# Supplementary material
Source: PubMed Central journal article supplement (PMC5903265)
Supplement: NIHMS958131-supplement-Supporting_Information.pdf [file NIHMS958131-supplement-Supporting_Information.pdf]

# *Parameterization of Acyclic Diaminocarbene Ligands Applied to a Gold(I)-Catalyzed Enantioselective Tandem Rearrangement/Cyclization*

Zachary L. Niemeyer<sup>†</sup>, Suresh Pindi<sup>‡</sup>, Dimitri A. Khrakovsky<sup>‡</sup>, Christian N. Kuzniewski<sup>‡</sup>, Cynthia M. Hong<sup>‡</sup>, Leo A. Joyce<sup>∨</sup>, Matthew S. Sigman<sup>\*†</sup>, F. Dean Toste<sup>\*‡</sup>

<sup>†</sup>Department of Chemistry, University of Utah, 315 South 1400 East, Salt Lake City, Utah 84112, United States

<sup>‡</sup>Department of Chemistry, University of California, Berkeley, California 94720, United States

<sup>∨</sup>Merck & Co., Inc., MRL, Department of Process Research & Development, Rahway, NJ 07065, USA

## **Table of Contents**

|                                                                  |      |
|------------------------------------------------------------------|------|
| General Considerations                                           | S2   |
| Catalyst Preparation                                             | S2   |
| Substrate Preparation                                            | S23  |
| Enantioselective 3,3-rearrangement-[2+2]cyclization reaction     | S28  |
| Reaction Optimization                                            | S29  |
| Product purification and characterization                        | S31  |
| Determination of absolute stereochemistry through VCD experiment | S37  |
| Computational Details                                            | S60  |
| References                                                       | S90  |
| X-ray analysis                                                   | S91  |
| HPLC Traces                                                      | S115 |
| <sup>1</sup> H and <sup>13</sup> C NMR Spectra                   | S129 |
| Computed Geometry Coordinates                                    | S183 |

## General Considerations:

Unless otherwise noted, reagents were obtained from commercial sources and used without further purification. Silver triflate (AgOTf) was obtained from Aldrich and stored amber bottle in desiccator. Dry tetrahydrofuran (THF), dichloromethane (DCM), and toluene were obtained by passage through activated alumina columns under argon. All other solvents used are HPLC grade. TLC analysis of reaction mixtures was performed on Merck silica gel 60 F254 TLC plates and visualized by ultraviolet light, iodine and/or potassiumpermanganate stain. Flash chromatography was carried out with ICN SiliTech 32-63 D60 Å silica gel.  $^1\text{H}$  and  $^{13}\text{C}$  NMR spectra were recorded with Bruker AVQ-400, AV-500, DRX-500, or AV-600 spectrometers and were referenced to residual  $^1\text{H}$  and  $^{13}\text{C}$  signals of the deuterated solvents, respectively ( $\delta\text{H}$  7.26,  $\delta\text{C}$  77.16 for chloroform and  $\delta\text{H}$  5.32,  $\delta\text{C}$  54.00 for dichloromethane).  $^{19}\text{F}$  NMR spectra were recorded with Bruker AVQ-400 spectrometer and were referenced to  $^{19}\text{F}$  signal of the hexafluorobenzene ( $\delta\text{F}$  -164.9). Chemical shifts ( $\delta$ ) are given in parts per million (ppm) and coupling constants values (J) are given in Hertz (Hz). Abbreviations for multiplicities are as follows: (s) singlet, (brs) broad singlet, (d) doublet, (dd) doublet of doublets, (t) triplet, (q) quartet, (m) multiplet. Enantioselectivity was determined by chiral HPLC using Daicel Chiralpak IC column (0.46 cm x 25 cm). Generally, racemic samples were prepared by the procedure of Zhang using  $\text{PPh}_3\text{AuCl}$  or  $\text{IPrAuCl}$  (IPr = 1,3-bis(2,6-diisopropylphenyl)imidazol-2-ylidene) and AgOTf.<sup>15</sup> Mass spectral data were obtained from the UC Berkeley Catalysis Center operated by usage of an Agilent Time of Flight (Q-TOF) mass spectrometer in ESI mode and micro-Mass/Analytical Facility operated by the College of Chemistry, University of California, Berkeley. X-ray crystallographic analysis was carried out at the College of Chemistry X-Ray Crystallographic Facility (CHEXRAY, University of California, Berkeley). Absolute stereochemistry was determined through VCD experiments at Merck facility.

## Catalyst Preparation:

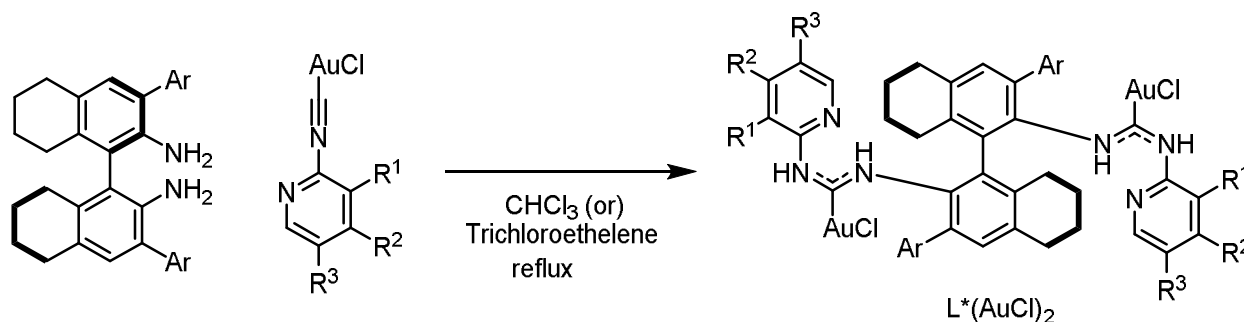

### General procedure for the preparation of Au (I) complexes:

5,5',6,6',7,7',8,8'-octahydro-3,3'-diido-2,2'-diamino-1,1'-binaphthyl and 5,5',6,6',7,7',8,8'-octahydro-3,3'-aryl substituted 2,2'-diamino-1,1'-binaphthyls<sup>16,18</sup> and Isocyanopyridyl gold(I) complexes<sup>17</sup>, and were prepared by following the procedure that was reported by our group and others previously<sup>18</sup>. The general synthesis procedure is described as follows.

A round bottomed flask equipped with reflux condenser was loaded with 3,3'-disubstituted H8-BINAM derivative (1.0 equiv.) and dissolved in CHCl<sub>3</sub> or trichloroethelene. Substituted Isocyanopyridyl gold (I) complex<sup>17</sup> (2.0 equiv.) was added and heated to reflux for 6h. At this stage, the other portion of Isocyanopyridyl gold (I) complex (1.0 equiv.) was added and further continued heating until the TLC indicates the starting material consumed. The reaction mixture was concentrated in vacuo and purified by column chromatography (1:1 DCM/Hexanes→DCM). The isolated product was further purified by vapor diffusion recrystallization with CHCl<sub>3</sub>/Pentane. The crystals were collected filtering through a fine frit Buchner filter funnel, and crystals were dissolved in DCM and dried in vacuo to give desired L\*(AuCl)<sub>2</sub> complex as powdered compound. The mother liquor was crystallized again by following the same procedure to yield another crop of L\*(AuCl)<sub>2</sub> complex.

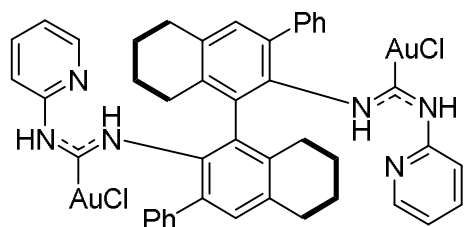

#### Complex L1\*(AuCl)<sub>2</sub>

0.0794 mmol scale, 73% yield (64.4 mg, 0.0576 mmol)

<sup>1</sup>H NMR (500 MHz, CD<sub>2</sub>Cl<sub>2</sub>) δ 13.44 (s, 2H), 8.36 (s, 2H), 8.29 – 8.22 (m, 2H), 7.80 – 7.66 (m, 2H), 7.31 (d, *J* = 7.5 Hz, 4H), 7.24 (dt, *J* = 14.5, 7.1 Hz, 6H), 7.18 – 7.07 (m, 4H), 6.86 (d, *J* = 8.3 Hz, 2H), 2.83 (d, *J* = 7.2 Hz, 4H), 2.61 (dt, *J* = 13.4, 6.5 Hz, 2H), 2.52 – 2.27 (m, 2H), 2.01 (d, *J* = 10.6 Hz, 2H), 1.87 (td, *J* = 14.8, 12.9, 6.6 Hz, 6H); <sup>13</sup>C NMR (126 MHz, CD<sub>2</sub>Cl<sub>2</sub>) δ 195.24, 155.17, 145.88, 139.79, 139.31, 138.51, 138.31, 135.26, 134.99, 133.40, 132.65, 130.59, 128.69,

127.25, 120.12, 114.95, 30.10, 28.75, 23.87, 23.46; HRMS (ESI+): calc'd for  $[C_{44}H_{40}N_6Au_2Cl_2]Na$ : 1139.1915, found: 1139.1934

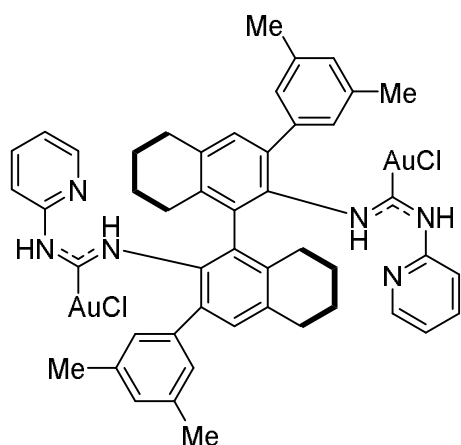

Complex L2\*(AuCl)<sub>2</sub>

0.287 mmol scale, 80% yield (269.5 mg, 0.230 mmol)

<sup>1</sup>H NMR (400 MHz, CD<sub>2</sub>Cl<sub>2</sub>) δ 13.39 (s, 2H), 8.33 – 8.24 (m, 2H), 8.14 (s, 2H), 7.72 (ddd, *J* = 8.3, 7.4, 1.9 Hz, 2H), 7.15 (s, 2H), 7.12 (ddd, *J* = 7.4, 5.1, 1.0 Hz, 2H), 6.94 – 6.92 (m, 4H), 6.86 – 6.82 (m, 4H), 2.83 (t, *J* = 6.0 Hz, 4H), 2.72 – 2.52 (m, 2H), 2.37 (dt, *J* = 16.1, 5.1 Hz, 2H), 2.15 (s, 12H), 2.06 – 1.97 (m, 2H), 1.95 – 1.80 (m, 6H); <sup>13</sup>C NMR (126 MHz, CD<sub>2</sub>Cl<sub>2</sub>) δ 195.39, 155.07, 145.94, 139.43, 139.38, 138.55, 138.46, 138.13, 135.32, 134.74, 133.29, 132.29, 128.65, 128.56, 120.13, 114.64, 30.15, 28.75, 23.90, 23.49, 21.37; HRMS (ESI+): calc'd for  $[C_{48}H_{48}N_6Au_2Cl_2]Na$ : 1195.2541, found: 1195.2546.

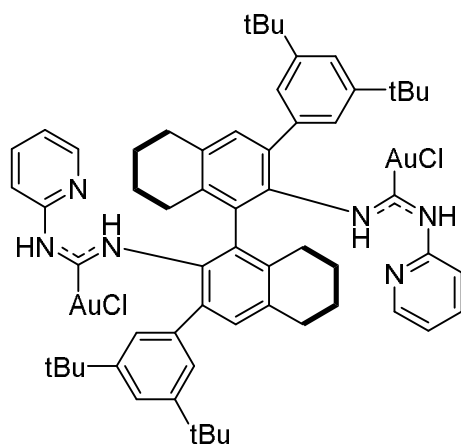

Complex L3\*(AuCl)<sub>2</sub>



0.156 mmol scale, 64% yield (133.6 mg, 0.0995 mmol)

$^1\text{H}$  NMR (500 MHz,  $\text{CD}_2\text{Cl}_2$ )  $\delta$  13.44 (s, 2H), 8.27 (d,  $J = 4.2$  Hz, 4H), 7.69 (t,  $J = 7.9$  Hz, 2H), 7.24 (t,  $J = 2.0$  Hz, 2H), 7.19 (s, 2H), 7.10 (d,  $J = 1.9$  Hz, 6H), 6.79 (d,  $J = 8.3$  Hz, 2H), 2.86 (t,  $J = 5.8$  Hz, 4H), 2.66 (d,  $J = 17.0$  Hz, 2H), 2.45 (dd,  $J = 14.1, 9.0$  Hz, 2H), 2.05 (q,  $J = 7.7$  Hz, 2H), 1.90 (dd,  $J = 20.1, 12.5$  Hz, 6H), 1.13 (s, 36H);  $^{13}\text{C}$  NMR (126 MHz,  $\text{CD}_2\text{Cl}_2$ )  $\delta$  195.54, 155.25, 150.99, 145.94, 139.63, 139.51, 138.69, 138.38, 135.35, 134.63, 133.52, 132.28, 125.25, 121.03, 120.12, 114.55, 35.14, 31.55, 30.24, 28.93, 23.98, 23.58; HRMS (ESI+): calc'd for  $[\text{C}_{60}\text{H}_{72}\text{N}_6\text{Au}_2\text{Cl}_2]\text{Na}$ : 1363.4419, found: 1363.4442.

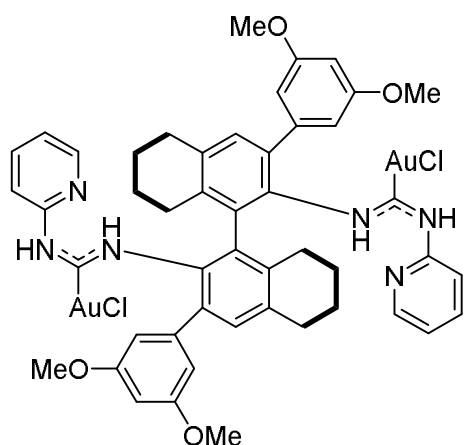

Complex L4\*(AuCl)<sub>2</sub>

$^1\text{H}$  NMR (500 MHz,  $\text{CD}_2\text{Cl}_2$ )  $\delta$  13.39 (s, 2H), 8.42 (s, 2H), 8.24 (d,  $J = 5.1$  Hz, 2H), 7.72 (t,  $J = 7.9$  Hz, 2H), 7.16 (s, 2H), 7.15 – 7.01 (m, 2H), 6.88 (d,  $J = 8.3$  Hz, 2H), 6.46 (d,  $J = 2.5$  Hz, 4H), 6.30 (t,  $J = 2.5$  Hz, 2H), 3.61 (s, 12H), 2.83 (s, 4H), 2.58 (d,  $J = 17.1$  Hz, 2H), 2.38 (dd,  $J = 13.9, 8.8$  Hz, 2H), 2.05 – 1.78 (m, 8H);  $^{13}\text{C}$  NMR (126 MHz,  $\text{CD}_2\text{Cl}_2$ )  $\delta$  195.14, 160.96, 155.21, 145.82, 141.68, 139.41, 138.54, 138.45, 135.26, 135.13, 133.33, 132.32, 120.17, 114.96, 108.50, 100.32, 55.84, 30.12, 28.79, 23.86, 23.45; HRMS (ESI+): calc'd for  $[\text{C}_{48}\text{H}_{48}\text{O}_4\text{N}_6\text{Au}_2\text{Cl}_2]\text{Na}$ : 1259.2338, found: 1259.2367.

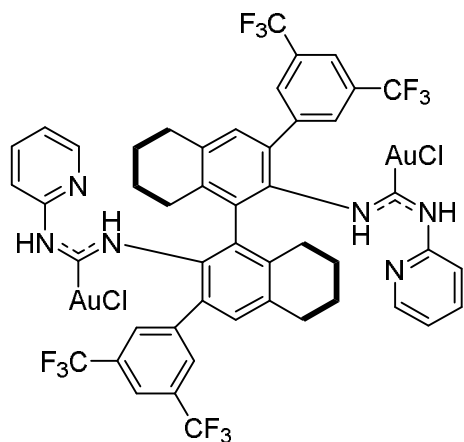

Complex L5\*(AuCl)<sub>2</sub>

0.268 mmol scale, 77% yield (287.7 mg, 0.207 mmol)

<sup>1</sup>H NMR (500 MHz, CD<sub>2</sub>Cl<sub>2</sub>) δ 13.57 (s, 2H), 8.78 (s, 2H), 8.25 (d, *J* = 5.0 Hz, 2H), 7.77 (s, 4H), 7.74 (d, *J* = 10.0 Hz, 4H), 7.25 (s, 2H), 7.19 – 7.08 (m, 2H), 6.90 (d, *J* = 8.3 Hz, 2H), 2.89 (t, *J* = 5.9 Hz, 4H), 2.70 – 2.57 (m, 2H), 2.43 (dt, *J* = 17.2, 5.1 Hz, 2H), 2.18 – 1.81 (m, 8H); <sup>13</sup>C NMR (126 MHz, CDCl<sub>3</sub>) δ 195.16, 155.05, 144.82, 141.08, 138.94, 138.26, 135.83, 135.45, 134.95, 133.56, 131.76, 131.40 (q, *J* = 33.1 Hz), 130.63, 123.28 (q, *J* = 273.4 Hz), 120.60, 119.82, 115.07, 29.82, 28.58, 23.38, 23.00; <sup>19</sup>F NMR (376 MHz, CD<sub>2</sub>Cl<sub>2</sub>) δ -63.54; HRMS (ESI<sup>+</sup>): calc'd for [C<sub>48</sub>H<sub>36</sub>N<sub>6</sub>Au<sub>2</sub>Cl<sub>2</sub>F<sub>12</sub>]Na: 1411.1410, found: 1411.1391.

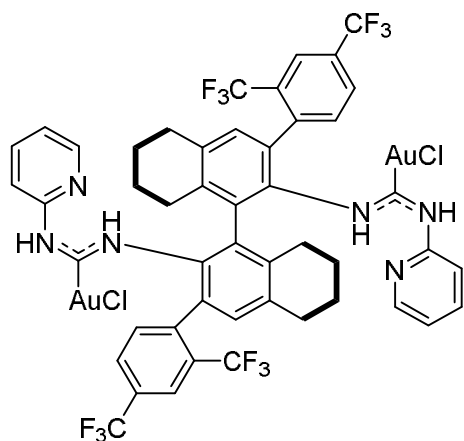

Complex L6\*(AuCl)<sub>2</sub>

0.0996 mmol scale, 56% yield (77.0 mg, 0.0554 mmol)

<sup>1</sup>H NMR (600 MHz, CD<sub>2</sub>Cl<sub>2</sub>) δ 13.50 (s, 2H), 8.40 (s, 2H), 8.19 (dd, *J* = 5.2, 1.8 Hz, 2H), 8.07 (d, *J* = 8.5 Hz, 2H), 7.81 (s, 2H), 7.80 (s, 2H), 7.71 – 7.67 (m, 2H), 7.14 – 7.06 (m, 2H), 7.00 (s, 2H), 6.87 (d, *J* = 8.3 Hz, 2H), 2.96 – 2.70 (m, 4H), 2.54 (dt, *J* = 17.2, 6.5 Hz, 2H), 2.25 (dt, *J* = 17.1,

5.3 Hz, 2H), 2.06 – 1.70 (m, 8H);  $^{13}\text{C}$  NMR (126 MHz,  $\text{CDCl}_3$ )  $\delta$  194.26, 154.88, 145.65, 141.48, 139.21, 138.44, 137.49, 136.85, 135.17, 134.68, 134.09, 132.57, 130.50 (q,  $J = 33.3$  Hz), 129.33 (q,  $J = 30.2$  Hz), 128.66 – 128.21 (m), 124.02 (q,  $J = 273.2$  Hz), 124.06 – 123.18 (m), 120.26, 114.78, 29.92, 28.18, 23.60, 23.21;  $^{19}\text{F}$  NMR (376 MHz,  $\text{CDCl}_3$ )  $\delta$  -59.63, -63.28; HRMS (ESI+): calc'd for  $[\text{C}_{48}\text{H}_{36}\text{N}_6\text{Au}_2\text{Cl}_2\text{F}_{12}]\text{Na}$ : 1411.1410, found: 1411.1427.

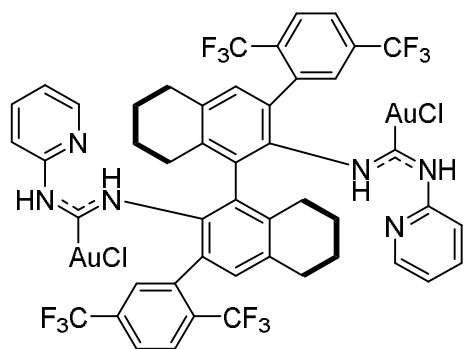

Complex L7\*(AuCl)<sub>2</sub>

0.101 mmol scale, 65% yield (90.2 mg, 0.0649 mmol)

$^1\text{H}$  NMR (500 MHz,  $\text{CDCl}_3$ )  $\delta$  13.50 (s, 2H), 8.69 (s, 2H), 8.31 – 8.09 (m, 4H), 7.86 – 7.45 (m, 6H), 7.08 (dd,  $J = 7.4, 5.2$  Hz, 2H), 7.03 (s, 2H), 6.90 (d,  $J = 8.3$  Hz, 2H), 2.81 (dh,  $J = 23.0, 5.9$  Hz, 4H), 2.54 (dt,  $J = 14.5, 7.0$  Hz, 2H), 2.25 (dt,  $J = 17.4, 5.3$  Hz, 2H), 2.14 – 1.75 (m, 8H);  $^{13}\text{C}$  NMR (126 MHz,  $\text{CDCl}_3$ )  $\delta$  194.64, 154.94, 145.62, 139.21, 138.68, 138.42, 137.47, 135.15, 134.71, 134.41, 133.29 (q,  $J = 33.3$  Hz), 132.84 – 132.76 (m), 132.69, 131.71 (q,  $J = 31.2, 30.8$  Hz), 127.10 (q,  $J = 4.9$  Hz), 125.28 (q,  $J = 3.8$  Hz), 124.14 (q,  $J = 275.4$  Hz), 123.82 (q,  $J = 274.3$  Hz), 120.22, 114.88, 29.95, 28.20, 23.64, 23.26;  $^{19}\text{F}$  NMR (376 MHz,  $\text{CDCl}_3$ )  $\delta$  -59.61, -63.25; HRMS (ESI+): calc'd for  $[\text{C}_{48}\text{H}_{36}\text{N}_6\text{Au}_2\text{Cl}_2\text{F}_{12}]\text{Na}$ : 1411.1410, found: 1411.1432.

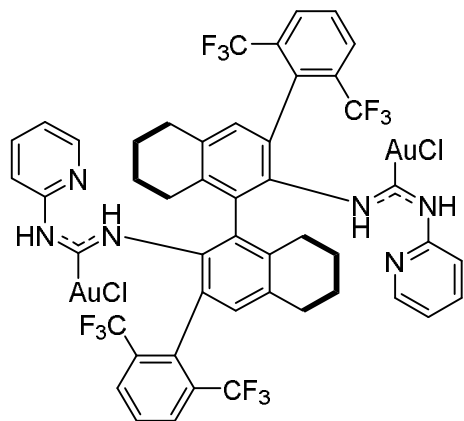

Complex L8\*(AuCl)<sub>2</sub>

0.0977 mmol scale, 53% yield (71.7 mg, 0.0516 mmol)

$^1\text{H}$  NMR (500 MHz,  $\text{CDCl}_3$ )  $\delta$  13.50 (s, 2H), 8.54 (s, 2H), 8.19 (d,  $J = 4.3$  Hz, 2H), 8.08 (d,  $J = 8.3$  Hz, 2H), 7.80 (s, 4H), 7.68 (t,  $J = 8.2$  Hz, 2H), 7.09 (dd,  $J = 7.6, 4.9$  Hz, 2H), 7.00 (s, 2H), 6.88 (d,  $J = 8.3$  Hz, 2H), 2.79 (tdd,  $J = 17.4, 14.4, 12.0, 7.8$  Hz, 4H), 2.54 (dt,  $J = 14.4, 6.8$  Hz, 2H), 2.25 (dt,  $J = 17.4, 5.2$  Hz, 2H), 2.06 – 1.73 (m, 8H);  $^{13}\text{C}$  NMR (126 MHz,  $\text{CDCl}_3$ )  $\delta$  194.53, 154.82, 145.71, 141.45, 139.30, 138.52, 137.54, 136.86, 135.18, 134.72, 134.07, 132.58, 130.56 (q,  $J = 33.4$  Hz), 129.38 (q,  $J = 30.3$  Hz), 128.62 – 128.31 (m), 124.05 (q,  $J = 274.3$  Hz), 123.79 – 123.18 (m), 120.33, 114.75, 29.94, 28.21, 23.61, 23.22;  $^{19}\text{F}$  NMR (376 MHz,  $\text{CDCl}_3$ )  $\delta$  -59.63, -63.28; HRMS (ESI+): calc'd for  $[\text{C}_{48}\text{H}_{36}\text{N}_6\text{Au}_2\text{Cl}_2\text{F}_{12}]\text{Na}$ : 1411.1410, found: 1411.1429.

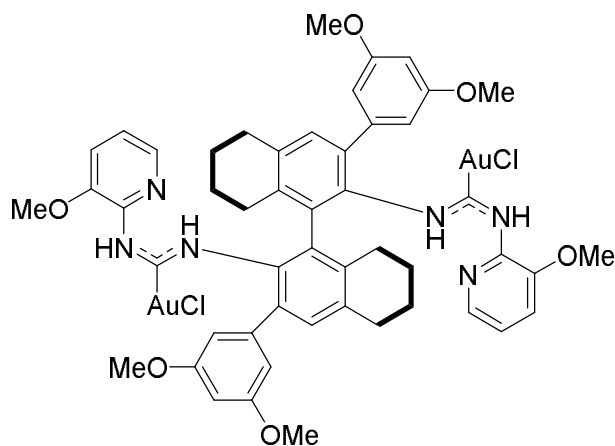

Complex L9\*(AuCl)<sub>2</sub>

0.179 mmol scale, 79% yield (183.5 mg, 0.141 mmol)

$^1\text{H}$  NMR (4:1 rotamer ratio, asterisks denote minor rotamer peaks, 600 MHz,  $\text{CD}_2\text{Cl}_2$ )  $\delta$  13.66\* (s, 0H), 13.56 (s, 2H), 8.54 (s, 2H), 8.51\* (s, 0H), 7.73 (d,  $J = 5.1$  Hz, 2H), 7.60\* (d,  $J = 5.4$  Hz, 0H), 7.32\* (s, 0H), 7.20 (s, 2H), 7.16 (d,  $J = 8.1$  Hz, 2H), 7.13\* (s, 0H), 7.06 (dd,  $J = 8.3, 5.1$  Hz, 2H), 7.03 – 6.96\* (m, 0H), 6.47\* (s, 0H), 6.45 (t,  $J = 1.8$  Hz, 4H), 6.36\* (d,  $J = 2.2$  Hz, 0H), 6.29 (q,  $J = 2.0$  Hz, 2H), 3.87\* (s, 0H), 3.84 (s, 6H), 3.75\* (s, 0H), 3.61 (s, 12H), 3.11 – 3.01\* (m, 0H), 2.97 – 2.81 (m, 4H), 2.71\* (dd,  $J = 15.8, 8.0$  Hz, 0H), 2.58 (dt,  $J = 17.1, 6.6$  Hz, 2H), 2.36 (dt,  $J = 16.9, 6.0$  Hz, 2H), 2.16 – 1.66\* (m, 8H, indistinguishable overlap of major and minor peaks);  $^{13}\text{C}$  NMR (asterisks denote minor rotamer peaks, 126 MHz,  $\text{CDCl}_3$ )  $\delta$  195.07, 161.02\*, 160.92, 145.87, 145.37\*, 144.65, 144.14\*, 141.87, 141.46\*, 139.39\*, 138.27, 138.14, 137.44\*, 137.19\*, 136.96\*, 136.14, 135.14, 134.93, 133.57, 132.43, 132.26\*, 120.81\*, 120.27, 118.57\*, 118.45, 108.87\*,

108.54, 100.17, 99.75\*, 56.54, 56.02\*, 55.78, 30.19, 29.28\*, 28.69, 23.89, 23.50, 23.38\*, 23.10\*;  
 HRMS (ESI+): calc'd for [C<sub>50</sub>H<sub>52</sub>O<sub>6</sub>N<sub>6</sub>Au<sub>2</sub>Cl<sub>2</sub>]Na: 1319.2549, found: 1319.2584.

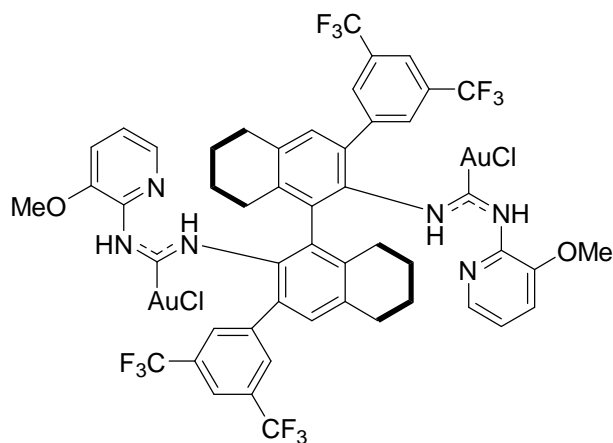

Complex L10\*(AuCl)<sub>2</sub>

0.153 mmol scale, 51% yield (112.6 mg, 0.0777 mmol)

<sup>1</sup>H NMR (5:1 rotamer ratio, asterisks denote minor rotamer peaks, 500 MHz, CD<sub>2</sub>Cl<sub>2</sub>) δ 13.93\* (s, 0H), 13.72 (s, 2H), 8.58 (s, 2H), 7.83\* (s, 0H), 7.82\* (s, 0H), 7.78\* (d, *J* = 1.4 Hz, 0H), 7.77 (t, *J* = 1.3 Hz, 4H), 7.73 (s, 2H), 7.71 – 7.68\* (m, 0H), 7.29 (s, 2H), 7.26\* (dd, *J* = 8.3, 1.3 Hz, 0H), 7.23\* (s, 0H), 7.21 (dd, *J* = 8.3, 1.4 Hz, 2H), 7.13 (dd, *J* = 8.2, 5.1 Hz, 2H), 7.11 – 7.07\* (m, 0H), 3.87\* (s, 0H), 3.83 (s, 6H), 3.10\* (d, *J* = 17.3 Hz, 0H), 3.00 – 2.86 (m, 4H), 2.79\* (d, *J* = 17.1 Hz, 0H), 2.64 (dt, *J* = 17.4, 6.4 Hz, 2H), 2.43 (dt, *J* = 17.5, 5.8 Hz, 2H), 2.16 – 1.69\* (m, 8H, indistinguishable overlap of major and minor peaks); <sup>13</sup>C NMR (asterisks denote minor rotamer peaks, 151 MHz, CD<sub>2</sub>Cl<sub>2</sub>) δ 196.19, 194.94\*, 145.76, 145.53\*, 144.84, 144.60\*, 142.07, 141.88\*, 140.60\*, 139.29, 139.07\*, 136.96, 136.30, 135.77\*, 135.21 (d, *J* = 4.3 Hz), 134.76\*, 133.78, 132.51, 132.39\*, 131.76 (q, *J* = 33.2 Hz), 131.48 – 130.80 (m), 124.85\*, 127.01 – 121.13 (m), 121.62\*, 120.98 (dd, *J* = 7.8, 3.9 Hz), 120.82, 118.96, 56.75, 30.25, 29.52\*, 28.94, 23.78, 23.40, 23.24\*, 22.97\*; <sup>19</sup>F NMR (asterisks denote minor rotamer peaks, 376 MHz, CDCl<sub>3</sub>) δ -63.32, -63.52\*; HRMS (ESI+): calc'd for [C<sub>50</sub>H<sub>40</sub>O<sub>2</sub>N<sub>6</sub>Au<sub>2</sub>Cl<sub>2</sub>F<sub>12</sub>]Na: 1471.1622, found: 1471.1649.

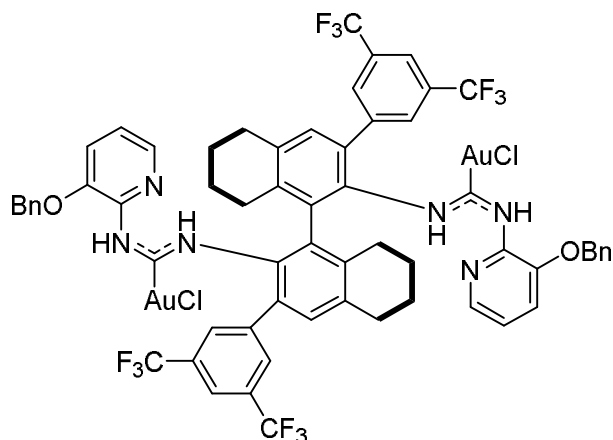

Complex L11\*(AuCl)<sub>2</sub>

0.093 mmol scale, 46% yield (68.6 mg, 0.0428 mmol)

<sup>1</sup>H NMR (7:1 rotamer ratio, asterisks denote minor rotamer peaks, 500 MHz, CDCl<sub>3</sub>) δ 14.02\* (s, 0H), 13.81 (s, 2H), 8.61 (d, *J* = 6.0 Hz, 2H), 8.56\* (s, 0H), 7.83\* (s, 0H), 7.79 (d, *J* = 5.2 Hz, 6H), 7.74 (s, 2H), 7.44 (d, *J* = 7.1 Hz, 4H), 7.39 – 7.34 (m, 4H), 7.33\* (d, *J* = 7.3 Hz, 0H), 7.30 (d, *J* = 3.3 Hz, 2H), 7.21 (d, *J* = 8.1 Hz, 2H), 7.07 (dd, *J* = 8.3, 4.7 Hz, 2H), 5.22 – 5.06 (m, 4H), 3.08\* (d, *J* = 17.1 Hz, 0H), 2.94 (t, *J* = 7.7 Hz, 4H), 2.79\* (d, *J* = 16.6 Hz, 0H), 2.65 (dd, *J* = 15.5, 7.1 Hz, 2H), 2.45 (dt, *J* = 17.6, 5.8 Hz, 2H), 2.13 – 1.68\* (m, 8H, indistinguishable overlap of major and minor peaks); <sup>13</sup>C NMR (asterisks denote minor rotamer peaks, 151 MHz, CD<sub>2</sub>Cl<sub>2</sub>) δ 196.40, 145.93, 143.83, 143.59\*, 142.08, 141.89\*, 139.33, 136.94, 136.51, 135.78, 135.33, 135.25, 133.81, 132.52, 131.77 (q, *J* = 33.0 Hz), 131.20, 129.28, 129.00, 128.42, 123.92 (q, *J* = 272.6 Hz), 121.50\*, 121.05, 120.70, 120.26, 78.13\*, 71.90, 30.26, 29.50\*, 28.97, 23.79, 23.41, 23.23\*, 22.97\*; <sup>19</sup>F NMR (asterisks denote minor rotamer peaks, 376 MHz, CDCl<sub>3</sub>) δ -63.35, -63.49\*; HRMS (ESI<sup>+</sup>): calc'd for [C<sub>62</sub>H<sub>48</sub>O<sub>2</sub>N<sub>6</sub>Au<sub>2</sub>Cl<sub>2</sub>F<sub>12</sub>]Na: 1623.2248, found: 1623.2308.

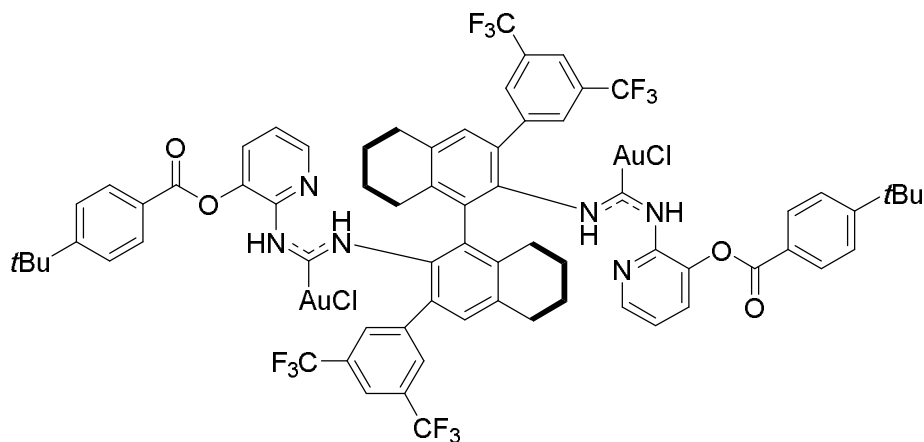

Complex L12\*AuCl)<sub>2</sub>

0.058 mmol scale, 27% yield (27.6 mg, 0.0158 mmol)

<sup>1</sup>H NMR (500 MHz, CD<sub>2</sub>Cl<sub>2</sub>) δ 13.74 (s, 2H), 8.40 (s, 2H), 8.16 (d, *J* = 5.2 Hz, 2H), 8.15 – 8.05 (m, 4H), 7.81 (s, 4H), 7.78 (dd, *J* = 8.1, 1.6 Hz, 2H), 7.74 (s, 2H), 7.60 – 7.46 (m, 4H), 7.32 (d, *J* = 3.2 Hz, 2H), 7.28 (dd, *J* = 8.2, 4.9 Hz, 2H), 2.94 (t, *J* = 6.7 Hz, 4H), 2.67 (dd, *J* = 16.4, 8.8 Hz, 2H), 2.49 (dt, *J* = 16.6, 4.8 Hz, 2H), 2.15 – 1.85 (m, 8H), 1.31 (s, 18H); <sup>13</sup>C NMR (126 MHz, CD<sub>2</sub>Cl<sub>2</sub>) δ 197.3, 163.9, 158.9, 147.4, 142.1, 141.6, 139.7, 136.8, 135.5, 135.3, 133.3, 132.7, 132.6, 131.7 (q, *J* = 35.2, 33.6 Hz), 131.1 – 131.0 (m), 131.0, 126.5, 125.6, 123.8 (q, *J* = 272.9 Hz), 121.5 – 121.0 (m), 120.7, 35.7, 31.3, 30.2, 29.1, 23.7, 23.3; <sup>19</sup>F NMR (376 MHz, CD<sub>2</sub>Cl<sub>2</sub>) δ -62.58; HRMS (ESI<sup>+</sup>): calc'd for [C<sub>70</sub>H<sub>60</sub>N<sub>6</sub>Au<sub>2</sub>Cl<sub>2</sub>F<sub>12</sub>]Na: 1763.3085, found: 1763.3063.

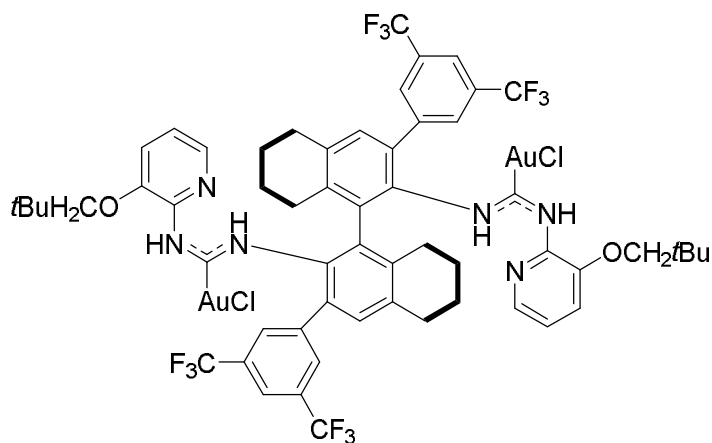

Complex L13\*AuCl)<sub>2</sub>

0.346 mmol scale, 43% yield (231.4 mg, 0.148 mmol)

<sup>1</sup>H NMR (7:1 rotamer ratio, asterisks denote minor rotamer peaks, 600 MHz, CD<sub>2</sub>Cl<sub>2</sub>) δ 14.06\* (s, 0H), 13.90 (s, 2H), 8.46 (s, 2H), 8.36\* (s, 0H), 7.86\* (s, 0H), 7.82\* (s, 0H), 7.81 (d, *J* = 5.1 Hz,

2H), 7.79 (s, 4H), 7.73 (s, 2H), 7.69\* (d,  $J = 5.1$  Hz, 0H), 7.30 (s, 2H), 7.27 (s, 0H), 7.24 (d,  $J = 8.0$  Hz, 2H), 7.13 (dd,  $J = 8.3, 5.0$  Hz, 2H), 7.08\* (dd,  $J = 8.3, 5.0$  Hz, 0H), 3.73 (d,  $J = 8.4$  Hz, 2H), 3.69\* (d,  $J = 8.9$  Hz, 0H), 3.62 (d,  $J = 8.5$  Hz, 2H), 3.17 – 3.02\* (m, 0H), 3.06 – 2.84 (m, 4H), 2.78\* (dt,  $J = 13.9, 6.1$  Hz, 0H), 2.75 – 2.61 (m, 2H), 2.46 (dt,  $J = 17.3, 5.3$  Hz, 2H), 2.39\* (d,  $J = 17.9$  Hz, 0H), 2.10 – 1.70\* (m, 8H, indistinguishable overlap of major and minor peaks), 1.02\* (s, 0H), 1.01 (s, 18H);  $^{13}\text{C}$  NMR (asterisks denote minor rotamer peaks, 151 MHz,  $\text{CD}_2\text{Cl}_2$ )  $\delta$  196.62, 195.10\*, 155.55\*, 145.90, 145.56\*, 144.47, 144.36\*, 142.00, 141.87\*, 140.64\*, 139.37, 139.11\*, 137.72\*, 136.95, 136.22\*, 136.10, 135.73\*, 135.40, 135.31, 134.67\*, 133.61, 132.54, 132.47\*, 131.75 (q,  $J = 33.0$  Hz), 131.24 – 131.13\* (m), 131.10 – 130.92 (m), 123.91 (q,  $J = 272.9$  Hz), 121.70\*, 121.16 – 120.93 (m), 120.85, 120.31\*, 119.82, 80.07\*, 79.84, 32.43\*, 32.35, 30.31\*, 30.25, 29.49\*, 29.01, 27.00, 26.88\*, 23.77, 23.36, 23.23\*, 22.95\*;  $^{19}\text{F}$  NMR (asterisks denote minor rotamer peaks, 376 MHz,  $\text{CDCl}_3$ )  $\delta$  -63.13\*, -63.51; HRMS (ESI+): calc'd for  $[\text{C}_{58}\text{H}_{56}\text{O}_2\text{N}_6\text{Au}_2\text{Cl}_2\text{F}_{12}]\text{Na}$ : 1583.2874, found: 1583.2883.

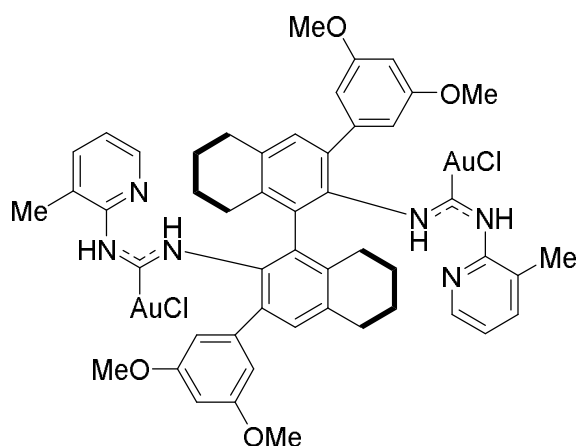

Complex L14\*(AuCl)<sub>2</sub>

0.199 mmol scale, 13% yield (32.9 mg, 0.0260 mmol)

$^1\text{H}$  NMR (500 MHz,  $\text{CD}_2\text{Cl}_2$ )  $\delta$  13.94 (s, 2H), 8.24 – 8.04 (m, 2H), 7.92 (s, 2H), 7.54 (d,  $J = 7.5$  Hz, 2H), 7.19 (s, 2H), 7.04 (dd,  $J = 7.5, 5.1$  Hz, 2H), 6.46 (d,  $J = 2.3$  Hz, 4H), 6.29 (t,  $J = 2.3$  Hz, 2H), 3.58 (s, 12H), 2.86 (d,  $J = 6.5$  Hz, 4H), 2.62 (dt,  $J = 14.3, 6.8$  Hz, 2H), 2.40 (dt,  $J = 16.4, 5.6$  Hz, 2H), 2.32 (s, 6H), 2.11 – 1.78 (m, 8H);  $^{13}\text{C}$  NMR (151 MHz,  $\text{CD}_2\text{Cl}_2$ )  $\delta$  196.04, 161.04, 153.95, 143.20, 141.80, 140.59, 138.60, 138.57, 135.32, 135.23, 133.44, 132.44, 123.07, 120.25, 108.51, 100.64, 55.84, 30.24, 28.87, 23.94, 23.49, 17.33; HRMS (ESI+): calc'd for  $[\text{C}_{50}\text{H}_{52}\text{O}_4\text{N}_6\text{Au}_2\text{Cl}_2\text{F}_{12}]\text{Na}$ : 1287.2651, found: 1287.2666.



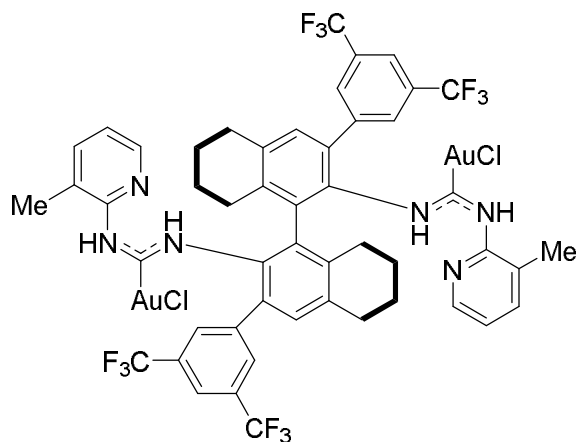

Complex L15\*(AuCl)<sub>2</sub>

0.265 mmol scale, 74% yield (280 mg, 0.197 mmol)

<sup>1</sup>H NMR (400 MHz, CD<sub>2</sub>Cl<sub>2</sub>) δ 14.15 (s, 2H), 8.12 (dd, *J* = 5.2, 1.8 Hz, 2H), 7.94 (s, 2H), 7.79 (d, *J* = 1.6 Hz, 4H), 7.73 (s, 2H), 7.58 (d, *J* = 7.4 Hz, 2H), 7.30 (s, 2H), 7.10 (dd, *J* = 7.5, 5.0 Hz, 2H), 2.91 (d, *J* = 5.6 Hz, 4H), 2.67 (dt, *J* = 13.8, 6.5 Hz, 2H), 2.47 (dt, *J* = 17.1, 5.0 Hz, 2H), 2.35 – 2.21 (m, 6H), 2.15 – 1.81 (m, 8H); <sup>13</sup>C NMR (126 MHz, CDCl<sub>3</sub>) δ 196.78, 153.65, 143.15, 141.79, 140.75, 139.39, 136.87, 135.35, 135.25, 133.49, 132.33, 131.66 (q, *J* = 33.2 Hz), 131.08, 123.81 (q, *J* = 272.8 Hz), 120.98 (q, *J* = 4.3 Hz), 30.18, 29.00, 23.70, 23.30, 17.15; <sup>19</sup>F NMR (376 MHz, CDCl<sub>3</sub>) δ -63.62; HRMS (ESI<sup>+</sup>): calc'd for [C<sub>50</sub>H<sub>40</sub>N<sub>6</sub>Au<sub>2</sub>Cl<sub>2</sub>F<sub>12</sub>]Na: 1439.1723, found: 1439.1726.

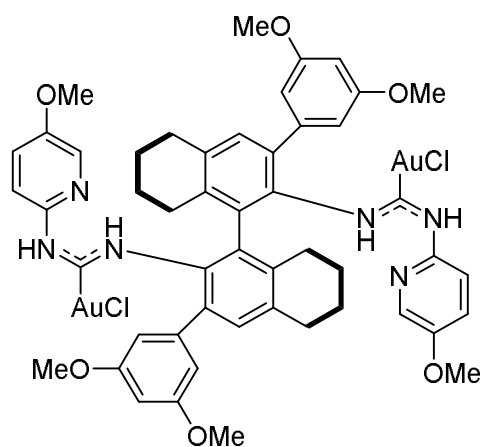

Complex L16\*(AuCl)<sub>2</sub>

0.187 mmol scale, 66% yield (161.2 mg, 0.124 mmol)

<sup>1</sup>H NMR (400 MHz, CD<sub>2</sub>Cl<sub>2</sub>) δ 13.04 (s, 2H), 8.19 (s, 2H), 7.89 (d, *J* = 3.0 Hz, 2H), 7.30 (dd, *J* = 9.0, 3.0 Hz, 2H), 7.15 (s, 2H), 6.86 (d, *J* = 9.0 Hz, 2H), 6.47 (d, *J* = 2.3 Hz, 4H), 6.31 (t, *J* = 2.3

Hz, 2H), 3.86 (s, 6H), 3.63 (s, 12H), 2.83 (d,  $J = 6.4$  Hz, 4H), 2.69 – 2.49 (m, 2H), 2.44 – 2.27 (m, 2H), 2.12 – 1.75 (m, 8H);  $^{13}\text{C}$  NMR (151 MHz,  $\text{CD}_2\text{Cl}_2$ )  $\delta$  193.87, 161.02, 153.30, 149.11, 141.84, 138.70, 138.29, 135.44, 135.13, 133.50, 132.30, 131.53, 125.71, 115.79, 108.67, 100.31, 56.63, 55.92, 30.18, 28.81, 23.96, 23.54; HRMS (ESI+): calc'd for  $[\text{C}_{50}\text{H}_{52}\text{O}_6\text{N}_6\text{Au}_2\text{Cl}_2]\text{Na}$ : 1319.2549, found: 1319.2568.

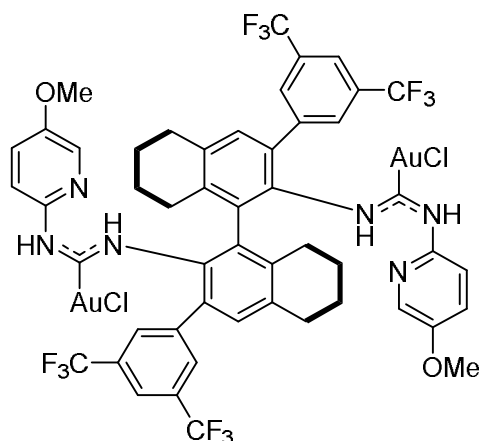

Complex L17\*AuCl)<sub>2</sub>

0.447 mmol scale, 73% yield (473.2 mg, 0.326 mmol)

$^1\text{H}$  NMR (500 MHz,  $\text{CD}_2\text{Cl}_2$ )  $\delta$  13.22 (s, 2H), 9.17 – 8.40 (m, 2H), 7.89 (d,  $J = 3.0$  Hz, 2H), 7.80 – 7.76 (m, 4H), 7.73 (s, 2H), 7.31 (dd,  $J = 9.0, 2.9$  Hz, 2H), 7.25 (s, 2H), 6.90 (d,  $J = 9.0$  Hz, 2H), 3.88 (d,  $J = 1.6$  Hz, 6H), 2.90 (t,  $J = 6.0$  Hz, 4H), 2.61 (dt,  $J = 16.2, 6.1$  Hz, 2H), 2.43 (dt,  $J = 16.8, 5.4$  Hz, 2H), 2.23 – 1.76 (m, 8H);  $^{13}\text{C}$  NMR (126 MHz,  $\text{CD}_3\text{CN}$ )  $\delta$  194.09, 153.91, 149.39, 142.60, 139.56, 137.73, 136.10, 135.63, 134.35, 132.39, 131.82 – 131.75 (m), 131.72 (q,  $J = 33.2$  Hz), 126.54, 124.37 (q,  $J = 272.3$  Hz), 121.20 (dd,  $J = 7.4, 4.0$  Hz), 118.31, 56.84, 30.23, 28.91, 23.89, 23.54;  $^{19}\text{F}$  NMR (376 MHz,  $\text{CDCl}_3$ )  $\delta$  -63.49; HRMS (ESI+): calc'd for  $[\text{C}_{50}\text{H}_{40}\text{O}_2\text{N}_6\text{Au}_2\text{Cl}_2\text{F}_{12}]\text{Na}$ : 1471.1622, found: 1471.1639.

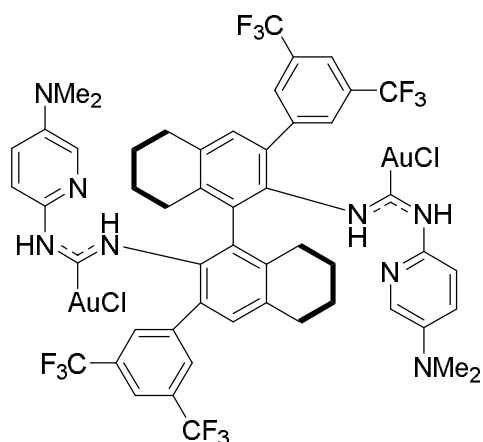

Complex L18\*(AuCl)<sub>2</sub>

0.101 mmol scale, 31% yield (46.4 mg, 0.0314 mmol)

<sup>1</sup>H NMR (500 MHz, CD<sub>2</sub>Cl<sub>2</sub>) δ 13.38 (s, 2H), 8.27 (s, 2H), 7.81 (s, 4H), 7.73 (s, 2H), 7.70 – 7.61 (m, 2H), 7.23 (s, 2H), 7.12 (dt, *J* = 8.6, 2.1 Hz, 2H), 6.76 (d, *J* = 8.8 Hz, 2H), 3.09 – 2.97 (m, 12H), 2.90 (t, *J* = 6.3 Hz, 4H), 2.74 – 2.52 (m, 2H), 2.43 (dt, *J* = 17.2, 5.5 Hz, 2H), 2.10 – 1.82 (m, 8H); <sup>13</sup>C NMR (126 MHz, CD<sub>2</sub>Cl<sub>2</sub>) δ 193.07, 145.56, 144.22, 142.11, 138.66, 136.70, 135.58, 135.35, 133.83, 132.17, 131.52 (q, *J* = 33.2 Hz), 131.19 – 130.98 (m), 128.63, 123.90 (q, *J* = 272.8 Hz), 123.26, 121.00 – 120.75 (m), 114.97, 40.61, 30.11, 28.90, 23.78, 23.36; <sup>19</sup>F NMR (376 MHz, CDCl<sub>3</sub>) δ -63.37; HRMS (ESI<sup>+</sup>): calc'd for [C<sub>52</sub>H<sub>46</sub>N<sub>8</sub>Au<sub>2</sub>Cl<sub>2</sub>F<sub>12</sub>]Na: 1497.2254, found: 1497.2255.

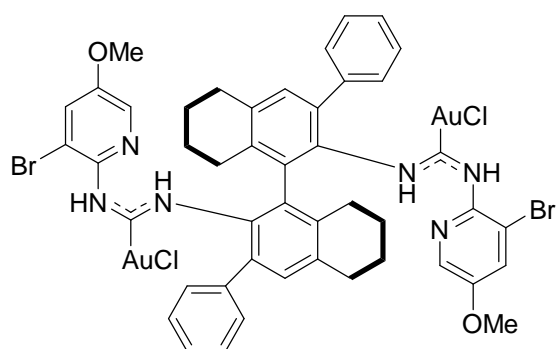

Complex L19\*(AuCl)<sub>2</sub>

0.112 mmol scale, 9% yield (13.1 mg, 0.0098 mmol)

<sup>1</sup>H NMR (400 MHz, CD<sub>2</sub>Cl<sub>2</sub>) δ 13.23 (s, 2H), 8.25 (s, 2H), 7.83 (d, *J* = 2.7 Hz, 2H), 7.56 (d, *J* = 2.7 Hz, 2H), 7.32 – 7.19 (m, 12H), 3.88 (s, 6H), 3.05 – 2.81 (m, 5H), 2.67 – 2.22 (m, 5H), 2.13 – 1.74 (m, 2H), 1.54 (s, 4H); <sup>13</sup>C NMR (126 MHz, CD<sub>2</sub>Cl<sub>2</sub>) δ 195.0, 152.6, 145.1, 139.3, 138.0,

137.7, 134.4, 134.3, 133.0, 132.5, 130.5, 130.1, 128.2, 128.2, 126.8, 109.1, 56.4, 29.7, 28.2, 23.4, 23.0; HRMS (ESI+): calc'd for  $[C_{46}H_{42}O_2N_6Au_2Br_2Cl_2]Na$ : 1355.0336, found: 1355.0353.

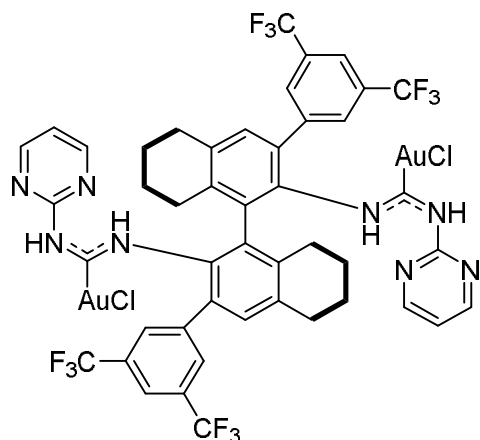

Complex L20\*(AuCl)<sub>2</sub>

0.100 mmol scale, 39% yield (53.9 mg, 0.0387 mmol)

<sup>1</sup>H NMR (500 MHz, CD<sub>2</sub>Cl<sub>2</sub>) δ 12.95 (s, 2H), 9.07 (s, 2H), 8.63 (s, 4H), 7.77 (s, 4H), 7.74 (s, 2H), 7.31 (s, 2H), 7.19 (t, *J* = 5.1 Hz, 2H), 2.92 (t, *J* = 6.1 Hz, 4H), 2.60 (dt, *J* = 16.9, 6.3 Hz, 2H), 2.44 (dt, *J* = 16.9, 5.3 Hz, 2H), 2.16 – 1.81 (m, 8H); <sup>13</sup>C NMR (126 MHz, CD<sub>2</sub>Cl<sub>2</sub>) δ 197.59, 159.04, 141.49, 139.73, 136.73, 135.47, 134.88, 133.34, 132.66, 131.75 (q, *J* = 33.2 Hz), 131.23 – 130.71 (m), 123.73 (q, *J* = 272.8 Hz), 121.27 – 121.03 (m), 118.13, 30.17, 29.04, 23.65, 23.34; <sup>19</sup>F NMR (376 MHz, CDCl<sub>3</sub>) δ -63.53; HRMS (ESI+): calc'd for  $[C_{46}H_{34}N_8Au_2Cl_2F_{12}]Na$ : 1413.1315, found: 1413.1350.

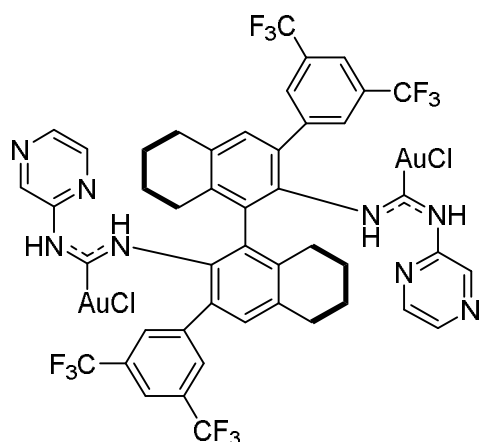

Complex L21\*(AuCl)<sub>2</sub>

0.0953 mmol scale, 38% yield (51.0 mg, 0.0366 mmol)

$^1\text{H}$  NMR (500 MHz,  $\text{CD}_2\text{Cl}_2$ )  $\delta$  12.74 (s, 2H), 10.19 (s, 2H), 8.44 (s, 2H), 8.36 (d,  $J = 2.9$  Hz, 2H), 8.15 – 8.01 (m, 2H), 7.72 (s, 2H), 7.65 (s, 4H), 7.26 (s, 2H), 2.94 (q,  $J = 6.2$  Hz, 4H), 2.61 – 2.47 (m, 2H), 2.48 – 2.28 (m, 2H), 2.07 – 1.80 (m, 8H);  $^{13}\text{C}$  NMR (126 MHz,  $\text{CD}_2\text{Cl}_2$ )  $\delta$  195.72, 151.11, 141.43, 140.20, 139.11, 138.95, 138.74, 136.54, 135.11, 134.61, 133.55, 132.50, 131.67 (q,  $J = 33.5$  Hz), 131.07, 123.79 (q,  $J = 272.5$  Hz), 121.39 – 120.83 (m), 30.11, 28.78, 23.73, 23.44;  $^{19}\text{F}$  NMR (376 MHz,  $\text{CDCl}_3$ )  $\delta$  -56.55; HRMS (ESI+): calc'd for  $[\text{C}_{46}\text{H}_{34}\text{N}_8\text{Au}_2\text{Cl}_2\text{F}_{12}]\text{Na}$ : 1413.1315, found: 1413.1339.

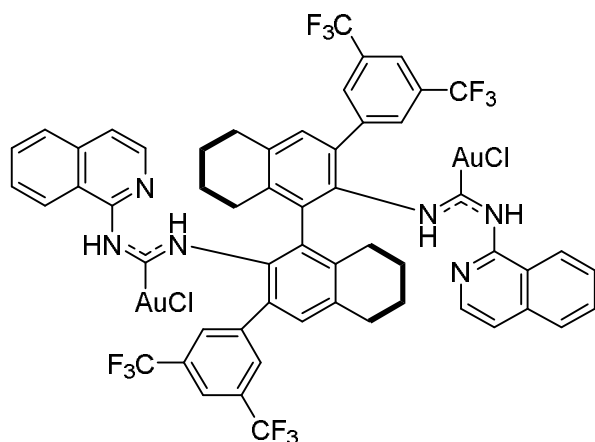

Complex L22\*(AuCl)<sub>2</sub>

0.105 mmol scale, 62% yield (92.0 mg, 0.062 mmol)

$^1\text{H}$  NMR (400 MHz,  $\text{CD}_2\text{Cl}_2$ )  $\delta$  14.67 (s, 2H), 8.97 (s, 2H), 8.14 (t,  $J = 7.4$  Hz, 4H), 7.89 (d,  $J = 8.1$  Hz, 2H), 7.81 (d,  $J = 7.9$  Hz, 6H), 7.73 – 7.65 (m, 4H), 7.56 (d,  $J = 5.9$  Hz, 2H), 7.27 (s, 2H), 2.87 (d,  $J = 5.9$  Hz, 4H), 2.85 – 2.69 (m, 2H), 2.53 (d,  $J = 17.4$  Hz, 2H), 2.15 (d,  $J = 10.3$  Hz, 2H), 2.03 – 1.85 (m, 6H);  $^{13}\text{C}$  NMR (126 MHz,  $\text{CD}_2\text{Cl}_2$ )  $\delta$  197.6, 152.6, 144.4, 141.7, 139.6, 137.9, 137.5, 136.9, 135.4, 135.3, 133.4, 132.5, 132.2, 131.8, 131.5, 131.1, 128.9, 127.9, 124.8, 122.8, 122.7, 119.1, 119.0, 30.2, 29.2, 23.7, 23.3;  $^{19}\text{F}$  NMR (376 MHz,  $\text{CD}_2\text{Cl}_2$ )  $\delta$  -62.64; HRMS (ESI+): calc'd for  $[\text{C}_{56}\text{H}_{40}\text{N}_6\text{Au}_2\text{Cl}_2\text{F}_{12}]\text{H}^+$ : 1489.1904, found: 1489.1902.

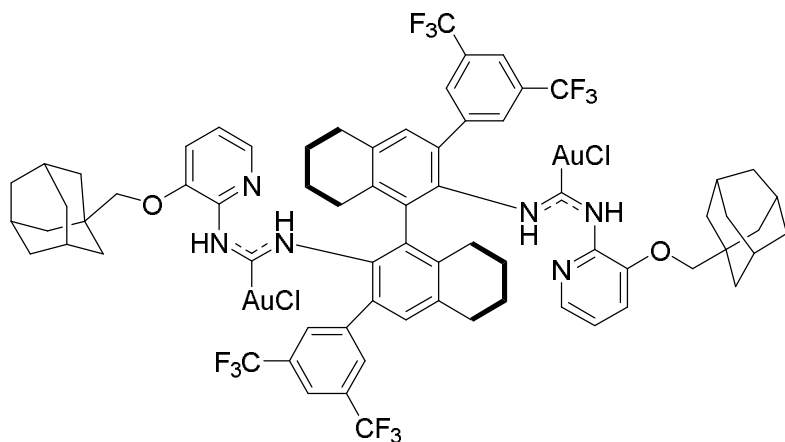

Complex L23\*(AuCl)<sub>2</sub>

0.209 mmol scale, 51% yield (185 mg, 0.108 mmol)

<sup>1</sup>H NMR (asterisks denote minor rotamer peaks, 600 MHz, CD<sub>2</sub>Cl<sub>2</sub>) δ 14.09\* (s, 0H), 13.97 (s, 1H), 8.46 (s, 1H), 8.37\* (s, 0H), 7.84 (d, *J* = 18.2 Hz, 1H), 7.81 – 7.76 (m, 3H), 7.73 (s, 1H), 7.71\* (dd, *J* = 5.2, 1.3 Hz, 0H), 7.31 – 7.22 (m, 3H), 7.12 (dd, *J* = 8.3, 5.0 Hz, 1H), 7.08\* (dd, *J* = 8.3, 5.2 Hz, 0H), 3.66 (d, *J* = 9.2 Hz, 1H), 3.64 – 3.59\* (m, 0H), 3.55 (d, *J* = 9.2 Hz, 1H), 3.09\* (m, 0H), 2.92 (m, 2H), 2.80\* (dd, *J* = 15.1, 8.4 Hz, 0H), 2.68 (m, 1H), 2.45 (m, 1H), 2.11 – 2.04 (m, 1H), 2.04 – 1.87 (m, 7H), 1.85 – 1.54\* (m, indistinguishable overlap of major and minor peaks 20H); <sup>13</sup>C NMR (asterisks denote minor rotamer peaks, 126 MHz, CDCl<sub>3</sub>) δ 196.4, 145.7, 144.4, 144.0\*, 141.3, 138.6, 136.0, 135.3, 135.1, 135.0, 133.4, 132.2, 131.6, 131.3, 130.5, 124.4, 122.2, 120.3, 119.6, 80.1, 39.6\*, 39.5, 37.0, 36.8\*, 34.1\*, 34.1, 29.9, 29.1\*, 28.7, 28.1, 27.9, 23.3, 22.9, 22.8\*, 22.5\*; <sup>19</sup>F NMR (asterisks denote minor rotamer peaks, 376 MHz, CD<sub>2</sub>Cl<sub>2</sub>) δ -62.2\*, -62.6; HRMS (ESI<sup>+</sup>): calc'd for [C<sub>70</sub>H<sub>68</sub>O<sub>2</sub>N<sub>6</sub>Au<sub>2</sub>Cl<sub>2</sub>F<sub>12</sub>]Na: 1739.3818, found: 1739.3817.

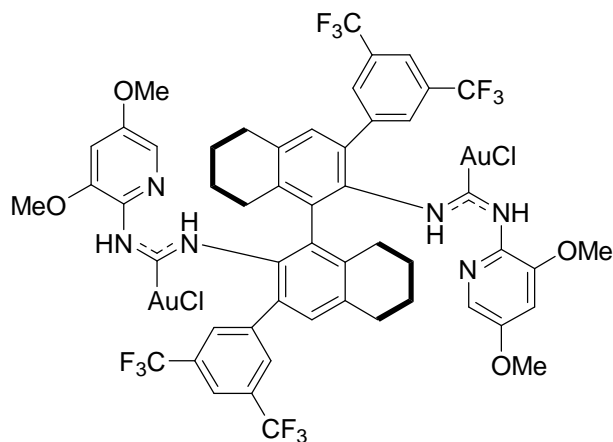

Complex L24\*(AuCl)<sub>2</sub>

0.252 mmol scale, 46% yield (173.0 mg, 0.115 mmol)

$^1\text{H}$  NMR (9:1 rotamer ratio, asterisks denote minor rotamer peaks, 600 MHz,  $\text{CD}_2\text{Cl}_2$ )  $\delta$  13.45\* (s, 0H), 13.41 (s, 2H), 8.42 (s, 2H), 7.88\* (s, 0H), 7.82\* (s, 0H), 7.78 (s, 4H), 7.73 (s, 2H), 7.41 (t,  $J = 1.9$  Hz, 2H), 7.29 (s, 2H), 7.27\* (d,  $J = 9.2$  Hz, 0H), 6.87\* (s, 0H), 6.85 – 6.76 (m, 2H), 3.89 (d,  $J = 1.6$  Hz, 6H), 3.86\* (s, 0H), 3.82 (d,  $J = 1.4$  Hz, 6H), 3.67\* (s, 0H), 3.09\* (d,  $J = 17.4$  Hz, 0H), 2.96 (p,  $J = 9.6, 8.2$  Hz, 4H), 2.76\* (d,  $J = 17.8$  Hz, 0H), 2.63 (dt,  $J = 17.0, 6.6$  Hz, 2H), 2.43 (dt,  $J = 17.2, 5.6$  Hz, 2H), 2.15 – 1.69\* (m, 8H, indistinguishable overlap of major and minor peaks);  $^{13}\text{C}$  NMR (151 MHz,  $\text{CD}_2\text{Cl}_2$ )  $\delta$  194.58, 154.42, 145.77, 142.18, 139.87, 138.99, 136.85, 135.24, 133.89, 132.49, 131.71 (q,  $J = 33.3$  Hz), 123.93 (q,  $J = 272.8$  Hz), 121.01 – 120.84 (m), 120.77, 107.70, 56.85, 56.79, 30.27, 28.90, 23.84, 23.45;  $^{19}\text{F}$  NMR (376 MHz,  $\text{CDCl}_3$ )  $\delta$  -63.45; HRMS (ESI+): calc'd for  $[\text{C}_{52}\text{H}_{44}\text{O}_4\text{N}_6\text{Au}_2\text{Cl}_2\text{F}_{12}]\text{Na}$ : 1531.1833, found: 1531.1846.

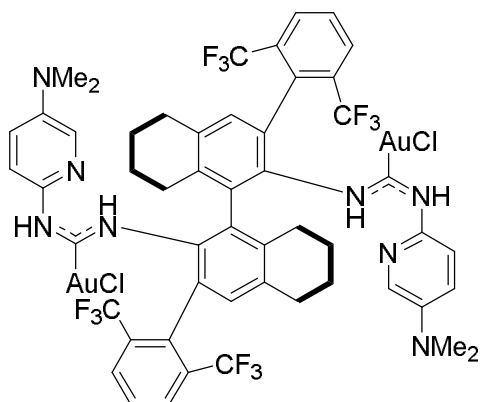

Complex L25\*(AuCl)<sub>2</sub>

0.126 mmol scale, 84% yield (155.0 mg, 0.105 mmol)

$^1\text{H}$  NMR (400 MHz,  $\text{CD}_2\text{Cl}_2$ )  $\delta$  13.26 (s, 2H), 8.22 (s, 2H), 8.08 (s, 2H), 7.78 – 7.54 (m, 6H), 7.07 (dd,  $J = 9.1, 3.1$  Hz, 2H), 7.01 (s, 2H), 6.74 (d,  $J = 9.0$  Hz, 2H), 2.95 (s, 12H), 2.81 (q,  $J = 7.4, 6.4$  Hz, 3H), 2.62 – 2.48 (m, 2H), 2.24 (d,  $J = 17.4$  Hz, 2H), 2.15 – 1.63 (m, 9H);  $^{13}\text{C}$  NMR (126 MHz,  $\text{CD}_2\text{Cl}_2$ )  $\delta$  192.4, 145.4, 144.2, 139.0, 138.0, 137.5, 135.5, 134.9, 134.7, 132.5, 128.7, 127.0, 125.2, 125.0, 123.2, 123.1, 114.8, 40.6, 29.9, 28.2, 23.7, 23.3;  $^{19}\text{F}$  NMR (376 MHz,  $\text{CD}_2\text{Cl}_2$ )  $\delta$  -58.67, -62.39; HRMS (ESI+): calc'd for  $[\text{M}-\text{Cl}] [\text{C}_{52}\text{H}_{46}\text{N}_8\text{Au}_2\text{ClF}_{12}]$ : 1439.2668, found: 1439.2680.

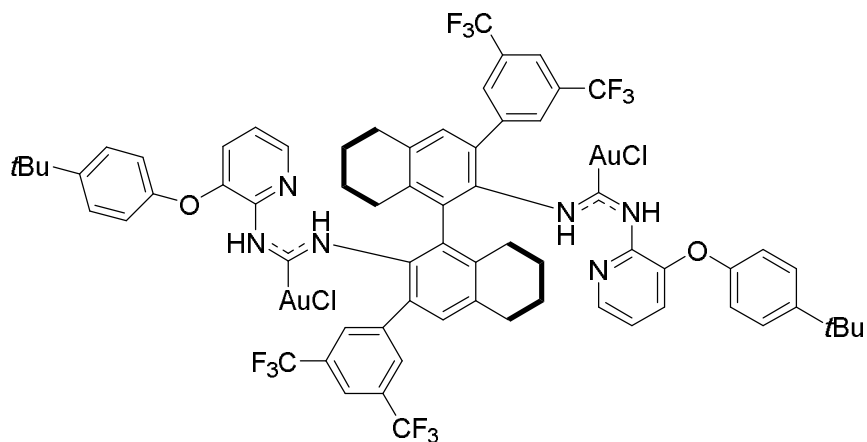

Complex L26\*(AuCl)<sub>2</sub>

0.0976 mmol scale, 73% yield (120 mg, 0.0712 mmol)

<sup>1</sup>H NMR (asterisks denote minor rotamer peaks, 400 MHz, CD<sub>2</sub>Cl<sub>2</sub>) δ 14.00\* (s, 0H), 13.77 (s, 2H), 8.75 (s, 2H), 7.98 – 7.70 (m, 7H), 7.50 – 7.31 (m, 5H), 7.19 – 7.11\* (m, 0H), 7.03 (m, 7H), 6.95\* (d, *J* = 8.8 Hz, 0H), 2.98 (m, 4H), 2.79 – 2.59 (m, 2H), 2.48 (dd, *J* = 14.6, 9.1 Hz, 2H), 2.16 – 1.80 (m, 8H), 1.31 (s, 18H); <sup>13</sup>C NMR (asterisks denote minor rotamer peaks, 126 MHz, CD<sub>2</sub>Cl<sub>2</sub>) δ 196.5, 151.8, 149.2, 146.0, 144.1, 142.0, 139.4, 138.0, 136.9, 135.3, 135.2, 133.8, 132.5, 132.2\*, 131.9, 131.6, 131.4\*, 131.2, 127.9\*, 127.6, 127.2\*, 125.0, 122.9, 122.8\*, 121.0\*, 120.7, 120.0\*, 35.0\*, 34.9, 31.7, 31.6, 30.3, 29.5\*, 29.0, 23.8, 23.4, 23.2\*, 22.9\*; <sup>19</sup>F NMR (asterisks denote minor rotamer peaks, 376 MHz, CD<sub>2</sub>Cl<sub>2</sub>) δ -62.2\*, -62.5; HRMS (ESI+): calc'd for [C<sub>68</sub>H<sub>60</sub>O<sub>2</sub>N<sub>6</sub>Au<sub>2</sub>Cl<sub>2</sub>F<sub>12</sub>]Na: 1707.3192, found: 1707.3165.

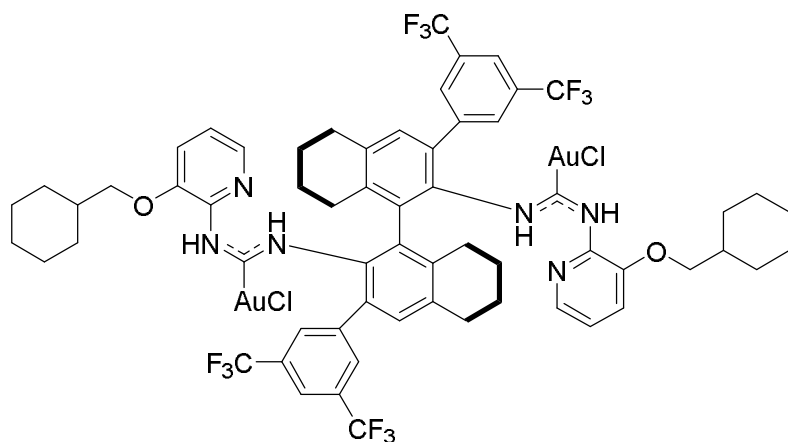

Complex L27\*(AuCl)<sub>2</sub>

0.153 mmol scale, 87% yield (217.0 mg, 0.134 mmol)



$^1\text{H}$  NMR (600 MHz, asterisks denote minor rotamer peaks,  $\text{CD}_2\text{Cl}_2$ )  $\delta$  14.08\* (s, 0H), 13.86 (s, 1H), 8.50 (s, 1H), 8.44\* (s, 0H), 7.83 (d,  $J = 1.6$  Hz, 0H), 7.81\* (s, 0H), 7.79 – 7.74 (m, 3H), 7.72 (m, 1H), 7.68\* (dd,  $J = 5.2, 1.3$  Hz, 0H), 7.27 (s, 1H), 7.25 – 7.22\* (m, 0H), 7.19 (dd,  $J = 8.3, 1.3$  Hz, 1H), 7.10 (dd,  $J = 8.2, 5.0$  Hz, 1H), 7.06\* (dd,  $J = 8.2, 5.1$  Hz, 0H), 3.88 – 3.80\* (m, 0H), 3.77 (d,  $J = 6.5$  Hz, 2H), 3.08\* (d,  $J = 17.3$  Hz, 0H), 3.02 – 2.85 (m, 2H), 2.82 – 2.73\* (m, 0H), 2.66 (m, 1H), 2.44 (m, 1H), 2.05 (m, 1H), 2.00 – 1.58 (m, 6H), 1.54 (s, 1H), 1.35 – 0.82 (m, 6H);  $^{13}\text{C}$  NMR (151 MHz, asterisks denote minor rotamer peaks,  $\text{CD}_2\text{Cl}_2$ )  $\delta$  196.5, 145.8, 145.6\*, 144.4, 144.2\*, 142.1, 141.9\*, 140.6\*, 139.3, 139.1\*, 136.9, 136.0\*, 135.9, 135.7\*, 135.4, 135.4, 134.7\*, 133.8, 132.6\*, 132.5, 132.4\*, 132.0\*, 131.8, 131.8, 131.6, 131.4\*, 131.1, 126.6\*, 124.8, 123.0, 121.6\*, 121.0\*, 120.8, 120.0\*, 119.5, 75.6, 37.4, 37.4\*, 30.4, 30.4(d,  $J = 3.3$  Hz), 30.3\*, 30.3, 30.2, 29.5\*, 29.0, 27.0, 26.9\*, 26.1(d,  $J = 8.2$  Hz), 26.1\*, 26.1\*, 26.0, 23.8, 23.4, 23.2\*, 23.0\*;  $^{19}\text{F}$  NMR (376 MHz, asterisk denote minor rotamer peak,  $\text{CD}_2\text{Cl}_2$ )  $\delta$  -62.19\*, -62.57; HRMS (ESI+): calc'd for  $[\text{C}_{62}\text{H}_{60}\text{O}_2\text{N}_6\text{Au}_2\text{Cl}_2\text{F}_{12}]\text{Na}$ : 1635.3192, found: 1635.3245.

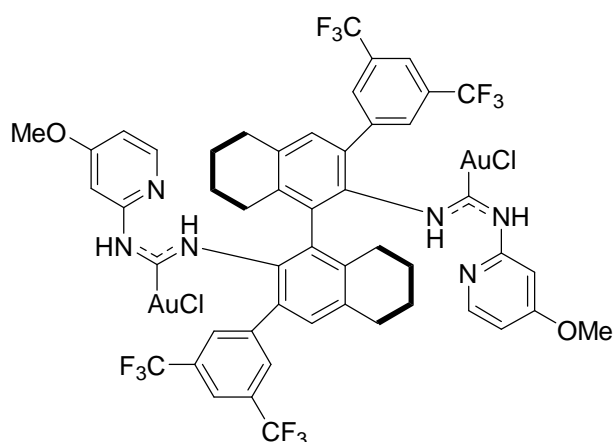

Complex L28\*(AuCl)<sub>2</sub>

0.237 mmol scale, 55% yield (190.0 mg, 0.131 mmol)

$^1\text{H}$  NMR (500 MHz,  $\text{CDCl}_3$ )  $\delta$  13.75 (s, 2H), 8.92 (s, 2H), 8.03 (d,  $J = 6.0$  Hz, 2H), 7.76 (s, 4H), 7.73 (s, 2H), 7.23 (s, 2H), 6.67 (dd,  $J = 5.9, 2.4$  Hz, 2H), 6.45 (d,  $J = 2.5$  Hz, 2H), 3.79 (s, 6H), 2.88 (t,  $J = 6.0$  Hz, 4H), 2.60 (dt,  $J = 16.8, 6.6$  Hz, 2H), 2.39 (dt,  $J = 16.7, 5.2$  Hz, 2H), 2.15 – 1.76 (m, 8H);  $^{13}\text{C}$  NMR (126 MHz,  $\text{CDCl}_3$ )  $\delta$  195.44, 167.89, 156.98, 146.66, 141.85, 138.90, 136.66, 135.37, 133.71, 132.19, 131.57 (q,  $J = 33.1$  Hz), 131.16 – 130.98 (m), 123.87 (q,  $J = 272.8$  Hz), 121.25 – 120.80 (m), 108.74, 98.98, 56.13, 30.13, 28.86, 23.72, 23.35;  $^{19}\text{F}$  NMR (376 MHz,

CDCl<sub>3</sub>) δ -63.49; HRMS (ESI+): calc'd for [C<sub>50</sub>H<sub>40</sub>O<sub>2</sub>N<sub>6</sub>Au<sub>2</sub>Cl<sub>2</sub>F<sub>12</sub>]Na: 1471.1622, found: 1471.1630.

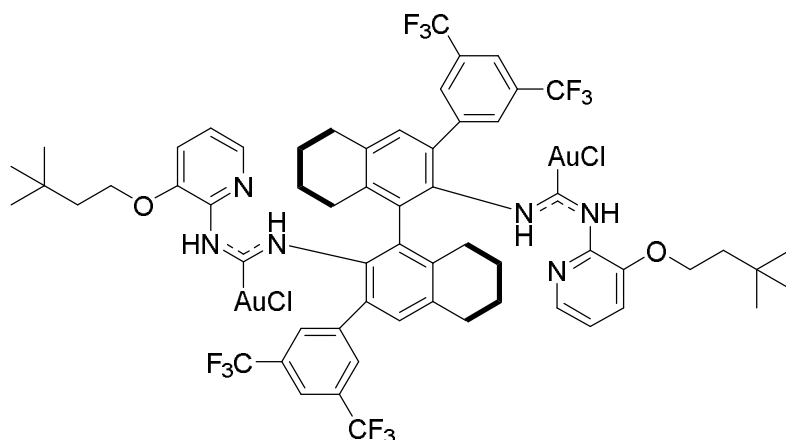

### Complex L29\*(AuCl)<sub>2</sub>

0.139 mmol scale, 62% yield (143.0 mg, 0.090 mmol)

<sup>1</sup>H NMR (600 MHz, asterisks denote minor rotamer peaks, CD<sub>2</sub>Cl<sub>2</sub>) δ 13.98\* (s, 0H), 13.76 (s, 2H), 8.54 (s, 2H), 8.49\* (s, 0H), 7.84\* (s, 1H), 7.82\* (s, 1H), 7.79 – 7.76 (m, 6H), 7.73 (s, 2H), 7.68 (d, *J* = 5.1 Hz, 0H), 7.28 (s, 2H), 7.26\* (d, *J* = 8.3 Hz, 0H), 7.23\* (s, 0H), 7.22 (dd, *J* = 8.3, 1.4 Hz, 2H), 7.11 (dd, *J* = 8.2, 5.0 Hz, 2H), 7.10 – 7.07\* (m, 0H), 4.15 – 4.00 (m, 5H, indistinguishable overlap of major and minor peaks), 3.09\* (d, *J* = 17.3 Hz, 0H), 3.03 – 2.86 (m, 4H), 2.83 – 2.74\* (m, 0H), 2.73 – 2.59 (m, 2H), 2.48 – 2.36 (m, 2H), 2.09 – 2.03 (m, 2H), 2.00 – 1.84 (m, 2H), 1.85 – 1.68 (m, 5H, indistinguishable overlap of major and minor peaks), 1.54 (s, 3H, indistinguishable overlap of major and minor peaks), 0.96\* (s, 4H), 0.94 (s, 18H); <sup>13</sup>C NMR (151 MHz, CD<sub>2</sub>Cl<sub>2</sub>) δ 196.3, 194.9\*, 145.8, 145.6\*, 144.2, 144.0\*, 142.1, 141.9\*, 140.6\*, 139.3, 139.1\*, 136.9, 136.1\*, 136.0, 135.7\*, 135.3, 134.7\*, 133.8, 132.6\*, 132.5, 132.4\*, 132.1\*, 131.8, 131.8\*, 131.6, 131.4\*, 131.1, 126.6\*, 124.8, 123.0, 121.6\*, 121.0\*, 121.0, 120.7, 119.7\*, 119.4, 100.6, 67.8\*, 67.7, 42.3\*, 42.2, 31.2\*, 30.3\*, 30.2, 30.1\*, 30.0, 29.9, 29.8, 29.5\*, 29.0, 23.8, 23.4, 23.2\*, 23.0\*; <sup>19</sup>F NMR (376 MHz, CD<sub>2</sub>Cl<sub>2</sub>) δ -62.13\*, -62.49; ; HRMS (ESI+): calc'd for [C<sub>60</sub>H<sub>60</sub>O<sub>2</sub>N<sub>6</sub>Au<sub>2</sub>Cl<sub>2</sub>F<sub>12</sub>]Na: 1611.3192, found: 1611.3241.

### Substrate Preparation:

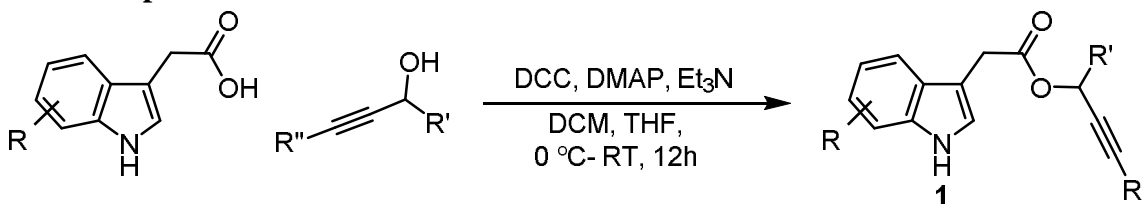

The synthesis of Indole propargyl acetates **1** was described before and the derivatives were prepared analogously.<sup>15</sup>

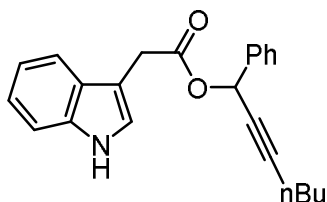

#### **1a**, 1-phenylhept-2-yn-1-yl 2-(1H-indol-3-yl)acetate

Compound **1a** was obtained in 90% yield; <sup>1</sup>H NMR (600 MHz, CDCl<sub>3</sub>) δ 8.07 (s, 1H), 7.58 (m, 1H), 7.55 – 7.50 (m, 2H), 7.41 – 7.34 (m, 3H), 7.31 (m, 1H), 7.20 (m, 1H), 7.12 (m, 1H), 7.06 (d, *J* = 2.4 Hz, 1H), 6.55 (t, *J* = 2.1 Hz, 1H), 3.97 – 3.66 (m, 2H), 2.28 (m, *J* = 7.1, 2.1 Hz, 2H), 1.53 (m, *J* = 8.5, 7.6, 6.2 Hz, 2H), 1.47 – 1.37 (m, 2H), 0.93 (t, *J* = 7.3 Hz, 3H); <sup>13</sup>C NMR (151 MHz, CDCl<sub>3</sub>) δ 171.0, 137.6, 136.1, 128.7, 128.5, 127.7, 127.2, 123.2, 122.1, 119.5, 118.9, 111.1, 108.0, 88.6, 76.7, 66.5, 31.4, 30.5, 21.9, 18.5, 13.6; HRMS-TOF Calculated for [C<sub>23</sub>H<sub>23</sub>NNaO<sub>2</sub>]: 368.1621; Found: 368.1636.

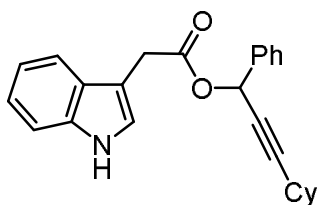

#### **1b**, 3-cyclohexyl-1-phenylprop-2-yn-1-yl 2-(1H-indol-3-yl)acetate

Compound **1b** was obtained in 92% yield; <sup>1</sup>H NMR (600 MHz, CDCl<sub>3</sub>) δ 8.08 (s, 1H), 7.60 (dd, *J* = 7.9, 1.1 Hz, 1H), 7.57 – 7.54 (m, 2H), 7.43 – 7.34 (m, 3H), 7.30 (m, 1H), 7.24 – 7.16 (m, 1H), 7.15 – 7.09 (m, 1H), 7.02 (d, *J* = 2.3 Hz, 1H), 6.60 (d, *J* = 1.9 Hz, 1H), 3.91 – 3.78 (m, 2H), 2.62 – 2.32 (m, 1H), 1.88 – 1.79 (m, 2H), 1.77 – 1.66 (m, 2H), 1.60 – 1.43 (m, 3H), 1.42 – 1.26 (m, 3H); <sup>13</sup>C NMR (151 MHz, CDCl<sub>3</sub>) δ 171.1, 137.8, 136.2, 128.8, 128.6, 128.6, 127.9, 127.9, 127.3, 123.3, 122.2, 119.6, 119.0, 111.3, 108.0, 92.6, 76.8, 66.6, 32.4, 32.4, 31.5, 29.2, 25.9, 24.8; HRMS-TOF Calculated for [C<sub>25</sub>H<sub>25</sub>NNaO<sub>2</sub>]: 394.1783; Found: 394.1802.

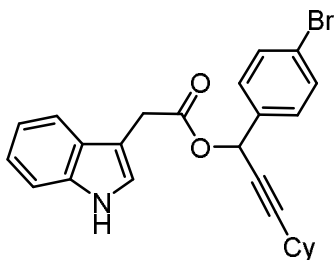

**1c**, 1-(4-bromophenyl)-3-cyclohexylprop-2-yn-1-yl 2-(1*H*-indol-3-yl)acetate

Compound 1c was obtained in 82% yield;  $^1\text{H}$  NMR (600 MHz,  $\text{CDCl}_3$ )  $\delta$  8.06 (s, 1H), 7.56 (m, 1H), 7.49 – 7.43 (m, 2H), 7.39 – 7.31 (m, 3H), 7.23 – 7.17 (m, 1H), 7.13 – 7.08 (m, 2H), 6.48 (d,  $J = 1.9$  Hz, 1H), 3.91 – 3.74 (m, 2H), 2.45 (h,  $J = 4.1$  Hz, 1H), 1.87 – 1.74 (m, 2H), 1.72 – 1.63 (m, 2H), 1.56 – 1.38 (m, 3H), 1.36 – 1.23 (m, 3H);  $^{13}\text{C}$  NMR (151 MHz,  $\text{CDCl}_3$ )  $\delta$  170.9, 136.9, 136.2, 131.7, 129.6, 127.3, 123.2, 122.9, 122.3, 119.8, 119.0, 111.3, 108.2, 93.0, 76.3, 65.9, 32.4, 32.4, 31.6, 29.2, 25.9, 24.9; HRMS-TOF Calculated for  $[\text{C}_{25}\text{H}_{24}\text{BrNNaO}_2]$ : 472.0888; Found: 472.0910.

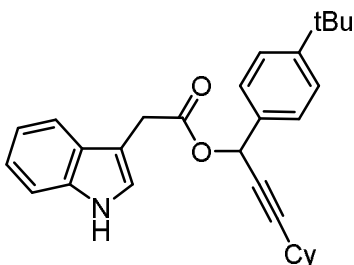

**1d**, 1-(4-(*tert*-butyl)phenyl)-3-cyclohexylprop-2-yn-1-yl 2-(1*H*-indol-3-yl)acetate

Compound 1d was obtained in 65% yield;  $^1\text{H}$  NMR (600 MHz,  $\text{CDCl}_3$ )  $\delta$  8.10 (s, 1H), 7.58 (dd,  $J = 7.9, 1.1$  Hz, 1H), 7.51 – 7.46 (m, 2H), 7.43 – 7.36 (m, 2H), 7.32 (m, 1H), 7.21 – 7.17 (m, 1H), 7.13 – 7.09 (m, 1H), 7.08 (d,  $J = 2.4$  Hz, 1H), 6.56 (d,  $J = 1.8$  Hz, 1H), 3.91 – 3.74 (m, 2H), 2.56 – 2.35 (m, 1H), 1.87 – 1.76 (m, 2H), 1.70 (m, 2H), 1.59 – 1.43 (m, 4H), 1.35 (s, 13H);  $^{13}\text{C}$  NMR (151 MHz,  $\text{CDCl}_3$ )  $\delta$  171.2, 151.8, 136.2, 134.7, 127.7, 127.3, 125.6, 123.3, 122.2, 119.6, 119.1, 111.2, 108.2, 92.4, 76.9, 66.4, 34.7, 32.5, 32.5, 31.6, 31.4, 29.2, 26.0, 24.9; HRMS-TOF Calculated for  $[\text{C}_{29}\text{H}_{33}\text{NNaO}_2]$ : 450.2409; Found: 450.2457.

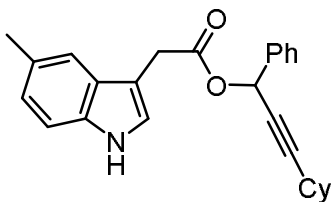

**1e**, 3-cyclohexyl-1-phenylprop-2-yn-1-yl 2-(5-methyl-1*H*-indol-3-yl)acetate

Compound 1e was obtained in 89% yield;  $^1\text{H}$  NMR (500 MHz,  $\text{CDCl}_3$ )  $\delta$  8.11 – 7.93 (m, 1H), 7.68 – 7.53 (m, 2H), 7.47 – 7.33 (m, 4H), 7.19 (d,  $J = 8.2$  Hz, 1H), 7.05 (dd,  $J = 8.3, 1.6$  Hz, 1H), 6.94 (d,  $J = 2.3$  Hz, 1H), 6.63 (d,  $J = 1.8$  Hz, 1H), 3.94 – 3.68 (m, 2H), 2.48 (s, 4H), 1.86 (m, 2H), 1.74 (m, 2H), 1.62 – 1.46 (m, 3H), 1.43 – 1.28 (m, 3H);  $^{13}\text{C}$  NMR (126 MHz,  $\text{CDCl}_3$ )  $\delta$  171.3, 137.7, 134.4, 128.7, 128.7, 128.6, 127.8, 127.4, 123.7, 123.5, 118.5, 111.0, 107.3, 92.6, 76.7, 66.5, 32.4, 32.4, 31.5, 29.1, 25.9, 24.8, 21.6; HRMS-TOF Calculated for  $[\text{C}_{26}\text{H}_{27}\text{NNaO}_2]$ : 408.1939; Found: 408.1978.

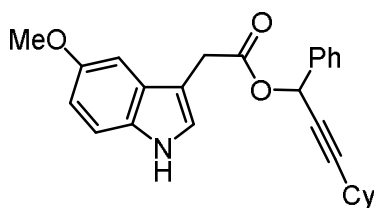

**1f**, 3-cyclohexyl-1-phenylprop-2-yn-1-yl 2-(5-methoxy-1H-indol-3-yl)acetate

Compound 1f was obtained in 68% isolated yield;  $^1\text{H}$  NMR (600 MHz,  $\text{CDCl}_3$ )  $\delta$  8.09 (s, 1H), 7.57 – 7.48 (m, 2H), 7.42 – 7.31 (m, 3H), 7.18 (d,  $J = 8.8$  Hz, 1H), 7.02 (dd,  $J = 12.8, 2.4$  Hz, 2H), 6.85 (dd,  $J = 8.8, 2.4$  Hz, 1H), 6.56 (d,  $J = 1.8$  Hz, 1H), 3.84 – 3.74 (m, 5H), 2.45 (q,  $J = 6.5, 4.2$  Hz, 1H), 1.81 – 1.77 (m, 2H), 1.73 – 1.64 (m, 2H), 1.57 – 1.39 (m, 3H), 1.36 – 1.25 (m, 3H);  $^{13}\text{C}$  NMR (151 MHz,  $\text{CDCl}_3$ )  $\delta$  171.1, 171.1, 154.2, 154.1, 137.8, 131.3, 128.8, 128.7, 128.6, 127.8, 127.6, 127.6, 124.1, 112.6, 112.0, 112.0, 107.8, 107.8, 100.6, 92.6, 76.7, 66.5, 55.8, 32.4, 32.4, 31.6, 29.2, 25.9, 24.8; HRMS-TOF Calculated for  $[\text{C}_{26}\text{H}_{27}\text{NNaO}_3]$ : 424.1889; Found: 424.1935.

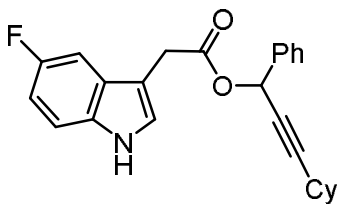

**1g**, 3-cyclohexyl-1-phenylprop-2-yn-1-yl 2-(5-fluoro-1H-indol-3-yl)acetate

Compound 1g was obtained in 96% isolated yield;  $^1\text{H}$  NMR (600 MHz,  $\text{CDCl}_3$ )  $\delta$  8.07 (s, 1H), 7.57 – 7.46 (m, 2H), 7.40 – 7.30 (m, 3H), 7.25 – 7.19 (m, 2H), 7.13 (d,  $J = 2.4$  Hz, 1H), 6.96 – 6.88 (m, 1H), 6.53 (d,  $J = 1.9$  Hz, 1H), 3.83 – 3.70 (m, 2H), 2.51 – 2.39 (m, 1H), 1.84 – 1.73 (m, 2H), 1.72 – 1.62 (m, 2H), 1.56 – 1.38 (m, 3H), 1.35 – 1.22 (m, 3H);  $^{13}\text{C}$  NMR (151 MHz,  $\text{CDCl}_3$ )  $\delta$  170.8, 158.8, 157.2, 137.7, 132.7, 128.9, 128.6, 127.9, 127.8, 127.7, 125.0, 111.9, 111.8, 110.8, 110.6, 108.6, 108.6, 104.3, 104.1, 92.8, 76.6, 66.7, 32.5, 32.4, 31.6, 29.2, 26.0, 24.9;  $^{19}\text{F}$  NMR (376 MHz,

$\text{CDCl}_3$ )  $\delta$  -123.57 (td,  $J = 9.5, 4.3$  Hz); HRMS-TOF Calculated for  $[\text{C}_{25}\text{H}_{24}\text{FNNaO}_2]$ : 412.1689; Found: 412.2082.

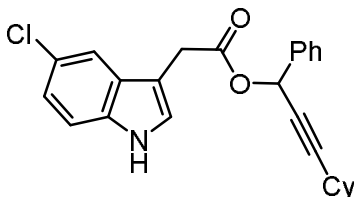

**1h**, 3-cyclohexyl-1-phenylprop-2-yn-1-yl 2-(5-chloro-1*H*-indol-3-yl)acetate

Compound 1h was obtained in 83% isolated yield;  $^1\text{H}$  NMR (600 MHz,  $\text{CDCl}_3$ )  $\delta$  8.13 (s, 1H), 7.53 (d,  $J = 7.6$  Hz, 3H), 7.42 – 7.31 (m, 3H), 7.17 (d,  $J = 8.6$  Hz, 1H), 7.11 (m, 1H), 7.04 (d,  $J = 2.4$  Hz, 1H), 6.53 (d,  $J = 1.8$  Hz, 1H), 3.82 – 3.66 (m, 2H), 2.54 – 2.38 (m, 1H), 1.85 – 1.74 (m, 2H), 1.73 – 1.62 (m, 2H), 1.57 – 1.40 (m, 3H), 1.29 (t,  $J = 10.0$  Hz, 3H);  $^{13}\text{C}$  NMR (151 MHz,  $\text{CDCl}_3$ )  $\delta$  170.9, 137.6, 134.6, 128.9, 128.7, 128.4, 127.9, 125.5, 124.7, 122.6, 118.6, 112.3, 108.0, 92.8, 76.6, 66.8, 32.4, 32.4, 31.5, 29.2, 25.9, 24.9; HRMS-TOF Calculated for  $[\text{C}_{25}\text{H}_{24}\text{ClNNaO}_2]$ : 428.1393; Found: 428.1812.

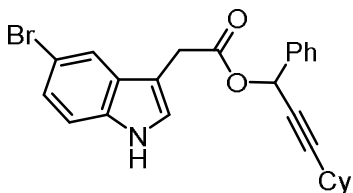

**1i**, 3-cyclohexyl-1-phenylprop-2-yn-1-yl 2-(5-bromo-1*H*-indol-3-yl)acetate

Compound 1i was obtained in 91% isolated yield;  $^1\text{H}$  NMR (600 MHz,  $\text{CDCl}_3$ )  $\delta$  8.22 (s, 1H), 7.70 (d,  $J = 1.8$  Hz, 1H), 7.60 – 7.52 (m, 2H), 7.43 – 7.34 (m, 3H), 7.22 (dd,  $J = 8.6, 1.9$  Hz, 1H), 7.06 (d,  $J = 8.6$  Hz, 1H), 6.90 (d,  $J = 2.5$  Hz, 1H), 6.56 (d,  $J = 1.8$  Hz, 1H), 3.81 – 3.69 (m, 2H), 2.56 – 2.41 (m, 1H), 1.81 (dd,  $J = 10.9, 5.7$  Hz, 2H), 1.69 (m, 2H), 1.59 – 1.22 (m, 6H);  $^{13}\text{C}$  NMR (151 MHz,  $\text{CDCl}_3$ )  $\delta$  171.1, 137.6, 134.8, 128.9, 128.7, 127.9, 125.0, 124.7, 121.5, 112.9, 112.8, 107.5, 92.9, 76.6, 66.9, 32.4, 32.4, 31.4, 29.1, 25.9, 24.8; HRMS-TOF Calculated for  $[\text{C}_{25}\text{H}_{24}\text{BrNNaO}_2]$ : 472.0888; Found: 472.1345.

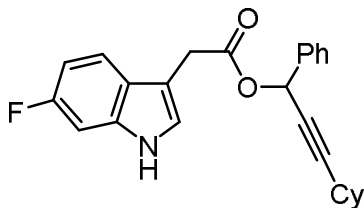

**1j**, 3-cyclohexyl-1-phenylprop-2-yn-1-yl 2-(6-fluoro-1*H*-indol-3-yl)acetate

Compound 1j was obtained in 80% isolated yield;  $^1\text{H}$  NMR (600 MHz,  $\text{CDCl}_3$ )  $\delta$  8.32 – 8.17 (m, 1H), 7.65 – 7.53 (m, 2H), 7.46 (dd,  $J = 8.7, 5.2$  Hz, 1H), 7.42 – 7.37 (m, 3H), 6.96 – 6.83 (m, 3H), 6.60 (d,  $J = 1.8$  Hz, 1H), 3.86 – 3.75 (m, 2H), 2.58 – 2.42 (m, 1H), 1.91 – 1.78 (m, 2H), 1.71 (m, 2H), 1.61 – 1.43 (m, 3H), 1.40 – 1.25 (m, 3H);  $^{13}\text{C}$  NMR (151 MHz,  $\text{CDCl}_3$ )  $\delta$  171.2, 160.8, 159.3, 123.7, 123.7, 123.7, 119.7, 119.6, 108.4, 108.2, 107.9, 97.6, 97.4, 92.8, 77.4, 77.2, 76.9, 76.6, 66.8, 32.4, 32.4, 31.5, 29.1, 25.9, 24.8;  $^{19}\text{F}$  NMR (376 MHz,  $\text{CDCl}_3$ )  $\delta$  -120.44 (td,  $J = 9.6, 5.3$  Hz); HRMS-TOF Calculated for  $[\text{C}_{25}\text{H}_{24}\text{FNNaO}_2]$ : 412.1689; Found: 412.2081.

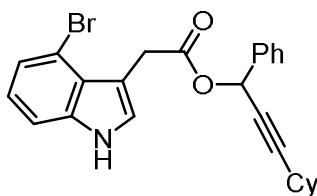

**1k**, 3-cyclohexyl-1-phenylprop-2-yn-1-yl 2-(4-bromo-1H-indol-3-yl)acetate

Compound 1k was obtained in 92% isolated yield;  $^1\text{H}$  NMR (500 MHz,  $\text{CDCl}_3$ )  $\delta$  8.46 (d,  $J = 2.6$  Hz, 1H), 7.73 – 7.51 (m, 2H), 7.48 – 7.33 (m, 3H), 7.21 (d,  $J = 7.6$  Hz, 1H), 7.07 (d,  $J = 8.1$  Hz, 1H), 6.91 (t,  $J = 7.8$  Hz, 1H), 6.67 (d,  $J = 2.2$  Hz, 2H), 4.11 – 3.97 (m, 2H), 2.52 (m, 1H), 1.94 – 1.80 (m, 2H), 1.74 (m, 2H), 1.53 (q,  $J = 10.3, 9.0$  Hz, 3H), 1.34 (m, 3H);  $^{13}\text{C}$  NMR (126 MHz,  $\text{CDCl}_3$ )  $\delta$  172.4, 137.7, 137.6, 128.8, 128.6, 128.0, 125.8, 125.3, 123.6, 122.8, 113.8, 110.9, 108.1, 92.7, 76.7, 66.7, 32.5, 32.4, 32.3, 29.2, 25.9, 24.9; HRMS-TOF Calculated for  $[\text{C}_{25}\text{H}_{24}\text{BrNNaO}_2]$ : 472.0888; Found: 472.0880.

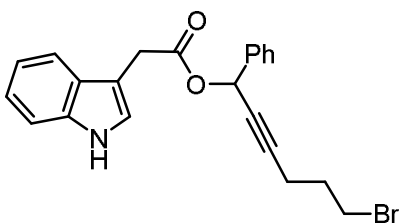

**1l**, 6-bromo-1-phenylhex-2-yn-1-yl 2-(1H-indol-3-yl)acetate

Compound 1l was obtained in 89% isolated yield;  $^1\text{H}$  NMR (500 MHz,  $\text{CDCl}_3$ )  $\delta$  8.10 (s, 1H), 7.60 (d,  $J = 7.9$  Hz, 1H), 7.56 – 7.50 (m, 2H), 7.44 – 7.35 (m, 3H), 7.31 (d,  $J = 8.1$  Hz, 1H), 7.24 – 7.18 (m, 1H), 7.13 (m, 1 Hz, 1H), 7.05 (d,  $J = 2.4$  Hz, 1H), 6.53 (t,  $J = 2.0$  Hz, 1H), 3.97 – 3.72 (m, 2H), 3.44 (t,  $J = 6.5$  Hz, 2H), 2.45 (m, 1 Hz, 2H), 2.01 (m, 2H);  $^{13}\text{C}$  NMR (126 MHz,  $\text{CDCl}_3$ )  $\delta$  171.1, 137.3, 136.1, 128.9, 128.7, 127.7, 127.2, 123.3, 122.2, 119.6, 118.9, 111.3, 107.9, 86.3,

78.0, 66.4, 32.5, 31.5, 31.1, 17.6; HRMS-TOF Calculated for [C<sub>25</sub>H<sub>24</sub>BrNNaO<sub>2</sub>]: 432.0575; Found: 432.0580.

**Enantioselective tandem 3,3-rearrangement-[2+2]cyclization reaction:**

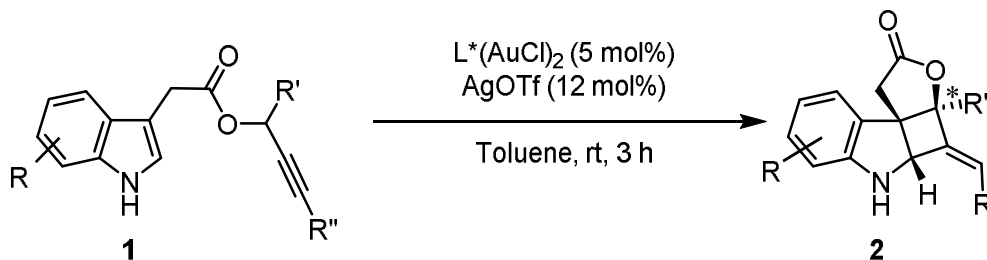

The corresponding gold(I) pre-catalyst L\*(AuCl)<sub>2</sub> (0.0025 mmol, 0.05 equiv) and silver triflate (1.6 mg, 0.006 mmol, 0.12 equiv) were weighed in a dram vial and toluene was added (1.0 mL). The heterogeneous mixture was sonicated for 5 min using a commercial ultrasonic cleaner, and then filtered through glass fiber into a second dram vial, which had been pre-weighed with substrate **1** (0.05 mmol, 1.0 equiv). The reaction vial was wrapped in aluminum foil and kept at room temperature for 3 h without stirring and then the reaction was quenched by addition of Et<sub>3</sub>N (ca. 200 μL, 1.4 mmol). The reaction solvent was then removed in vacuo and the crude reaction mixture was re-dissolved in Et<sub>2</sub>O and passed through a plug of silica gel to remove the catalyst. The solvent was again removed in vacuo and a solution of 1,3,5-trimethoxybenzene in CDCl<sub>3</sub> (1.0 mL, 0.03 M) was added via syringe for <sup>1</sup>H NMR analysis. A small portion of this sample was diluted with 85:15 hexanes:isopropanol and subjected to chiral HPLC analysis. For spectral data purpose, the crude mixture was purified by column chromatography Hexanes → 4:1 Hexanes/Ether.



## Reaction optimization:

ee trends in DCM and Toluene

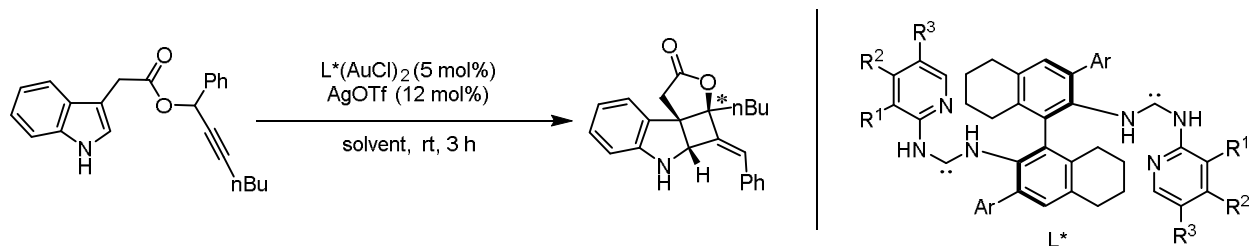

| Pre-catalyst | Ar                     | R <sup>1</sup>                          | R <sup>2</sup> | R <sup>3</sup> | % ee in DCM | % ee in Toluene |
|--------------|------------------------|-----------------------------------------|----------------|----------------|-------------|-----------------|
| 1            | 3,5-CH <sub>3</sub> Ph | H                                       | H              | H              | +30         | +39             |
| 2            | 3,5-OMePh              | H                                       | H              | H              | +59         | +50             |
| 3            | 3,5-CF <sub>3</sub> Ph | H                                       | H              | H              | +37         | +35             |
| 4            | 3,5-CF <sub>3</sub> Ph | Me                                      | H              | H              | -9          | -5              |
| 5            | 3,5-CF <sub>3</sub> Ph | H                                       | OMe            | H              | +52         | +62             |
| 6            | 3,5-CF <sub>3</sub> Ph | O(4-tBuPh)                              | H              | H              | -40         | -44             |
| 7            | 3,5-CF <sub>3</sub> Ph | OCH <sub>2</sub> Cy                     | H              | H              | -63         | -80             |
| 8            | 3,5-CF <sub>3</sub> Ph | OCH <sub>2</sub> tBu                    | H              | H              | -72         | -80             |
| 9            | 3,5-CF <sub>3</sub> Ph | OCH <sub>2</sub> CH <sub>2</sub> tButyl | H              | H              | -56         | -79             |
| 10           | 3,5-CF <sub>3</sub> Ph | OCH <sub>2</sub> Adamantyl              | H              | H              | -72         | -81             |

ee was determined by chiral HPLC analysis and are averages from two runs. '+' sign represents (*R,R,R*)-isomer and '-' sign represents (*S,S,S*)- isomer.

## Solvent optimization:

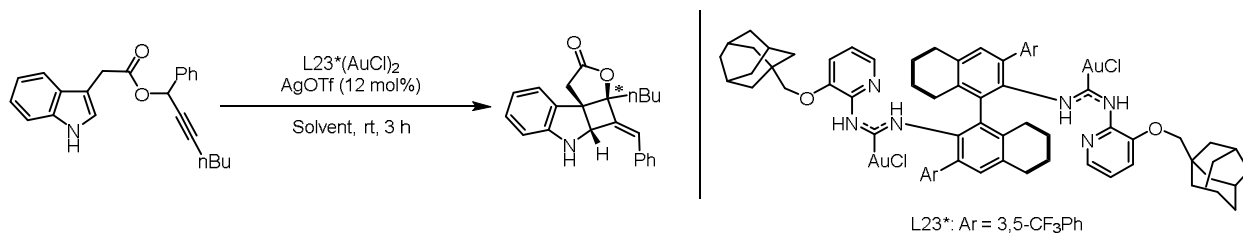

| Entry | Solvent     | % Yield | % ee |
|-------|-------------|---------|------|
| 1     | Benzene     | 89      | -81  |
| 2     | Cyclohexane | 65      | -69  |
| 3     | Hexanes     | ND      | ND   |

|   |                   |    |     |
|---|-------------------|----|-----|
| 4 | Trichloroethelene | 91 | -75 |
| 5 | Xylene            | 91 | -81 |
| 6 | Toluene           | 98 | -82 |
| 7 | Toluene:DCM (5:1) | 96 | -78 |
| 8 | Toluene:DCM (1:5) | 94 | -79 |
| 9 | DCM               | 95 | -72 |

<sup>a</sup>Unless otherwise noted, all reactions were carried out with 1a (0.05 mmol) for 3 h. <sup>b</sup>Yields are determined by NMR spectroscopy with 1,3,5- trimethoxybenzene as internal standard. <sup>c</sup>ee was determined by chiral HPLC analysis and are averages from two runs. ‘+’ sign represents (*R,R,R*)- isomer and ‘-’ sign represents (*S,S,S*)- isomer.

### Silver salt optimization

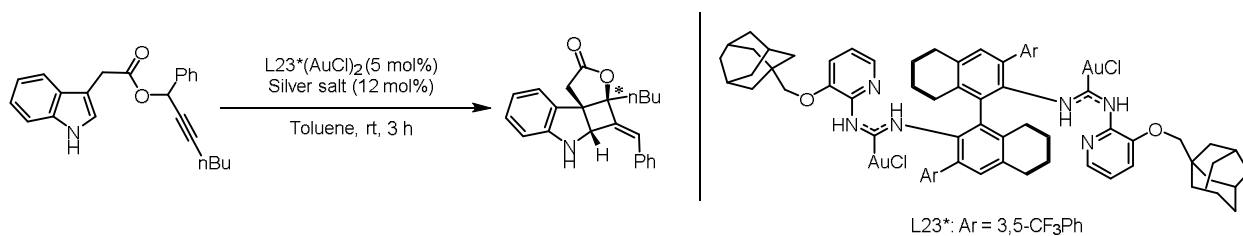

| Entry | Silver salt                               | % Yield | % ee |
|-------|-------------------------------------------|---------|------|
| 1     | AgOAc                                     | ND      | ND   |
| 2     | AgBF <sub>4</sub>                         | 74      | -82  |
| 3     | AgNTf <sub>2</sub>                        | 45      | -26  |
| 4     | AgONf                                     | 85      | -75  |
| 5     | AgPFBS                                    | 90      | -77  |
| 6     | AgONs                                     | 93      | -80  |
| 7     | 4-CF <sub>3</sub> -PhSO <sub>3</sub> Ag   | 87      | -80  |
| 8     | 3,5-CF <sub>3</sub> -PhSO <sub>3</sub> Ag | 74      | -80  |
| 9     | AgOTf                                     | 98      | -82  |

<sup>a</sup>Unless otherwise noted, all reactions were carried out with 1a (0.05 mmol) for 3 h. <sup>b</sup>Yields are determined by NMR spectroscopy with 1,3,5- trimethoxybenzene as internal standard. <sup>c</sup>ee was determined by chiral HPLC analysis and are averages from two runs. ‘+’ sign represents (*R,R,R*)- isomer and ‘-’ sign represents (*S,S,S*)- isomer.

## Product Purification/Characterization Data

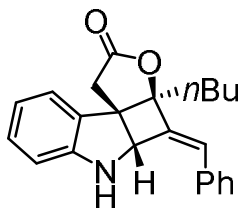

### Product 2a

Following the general procedure for enantioselective tandem 3,3-rearrangement-[2+2]cyclization reaction with L23\*(AuCl)<sub>2</sub> pre-catalyst, compound 2a, was isolated as white solid in 92% yield. <sup>1</sup>H NMR (500 MHz, CDCl<sub>3</sub>) δ 7.39 (d, *J* = 4.4 Hz, 4H), 7.36 – 7.29 (m, 1H), 7.13 (m, 2H), 6.84 (m, 1H), 6.67 (d, *J* = 7.8 Hz, 1H), 6.62 (d, *J* = 1.8 Hz, 1H), 5.02 (d, *J* = 2.1 Hz, 1H), 4.40 (s, 1H), 3.19 – 3.02 (m, 2H), 1.84 (m, 1H), 1.69 – 1.54 (m, 1H), 1.51 – 1.36 (m, 2H), 1.27 (m, 2H), 0.86 (m, 3H); <sup>13</sup>C NMR (126 MHz, CDCl<sub>3</sub>) δ 175.7, 152.9, 144.2, 135.2, 129.5, 129.0, 128.9, 128.5, 128.4, 125.7, 124.3, 119.8, 111.5, 96.9, 67.1, 58.8, 39.3, 32.2, 25.5, 23.0, 14.0; [α]<sub>D</sub><sup>20</sup> = –429 (c = 0.875, CHCl<sub>3</sub>); HPLC: IC column, 85:15 hexanes:isopropanol, 1.00 mL/min, t<sub>1</sub> = minor: 11.72 min, t<sub>2</sub> = major: 13.57 min. 82% ee; HRMS-TOF Calculated for [C<sub>23</sub>H<sub>23</sub>NNaO<sub>2</sub>]: 368.1621; Found: 368.1614.

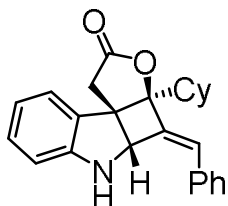

### Product 2b

Following the general procedure for enantioselective tandem 3,3-rearrangement-[2+2]cyclization reaction with L23\*(AuCl)<sub>2</sub> pre-catalyst, compound 2b, was isolated as white solid in 69% yield. <sup>1</sup>H NMR (500 MHz, CDCl<sub>3</sub>) δ 7.39 (d, *J* = 4.4 Hz, 4H), 7.36 – 7.28 (m, 1H), 7.20 – 7.11 (m, 2H), 6.83 (m, 1H), 6.73 – 6.64 (m, 2H), 4.92 (d, *J* = 1.8 Hz, 1H), 4.43 (s, 1H), 3.23 – 2.95 (m, 2H), 2.00 – 1.85 (m, 1H), 1.80 – 1.54 (m, 5H), 1.41 – 1.23 (m, 1H), 1.19 – 0.97 (m, 4H); <sup>13</sup>C NMR (126 MHz, CDCl<sub>3</sub>) δ 175.9, 153.4, 143.4, 135.4, 130.7, 129.5, 128.9, 128.4, 126.0, 124.8, 119.6, 111.2, 99.1, 67.8, 58.8, 41.1, 39.7, 26.7, 26.5, 26.2, 26.1, 26.0; [α]<sub>D</sub><sup>20</sup> = –343 (c = 0.683, CHCl<sub>3</sub>); HPLC:

IC column, 85:15 hexanes:isopropanol, 1.00 mL/min,  $t_1$  = minor: 11.55 min,  $t_2$  = major: 13.54 min. 91% ee; HRMS-TOF Calculated for  $[C_{25}H_{25}NNaO_2]$ : 394.1783; Found: 394.1794.

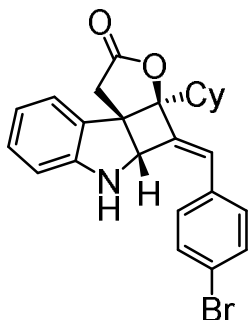

#### Product 2c

Following the general procedure for enantioselective tandem 3,3-rearrangement-[2+2]cyclization reaction with L23\*(AuCl)<sub>2</sub> pre-catalyst, compound 2c, was isolated as white solid in 84% yield.

<sup>1</sup>H NMR (500 MHz, CDCl<sub>3</sub>)  $\delta$  7.63 – 7.46 (m, 2H), 7.35 – 7.25 (m, 2H), 7.26 – 7.13 (m, 1H), 6.88 (m, 1H), 6.74 (d,  $J$  = 7.8 Hz, 1H), 6.64 (d,  $J$  = 1.7 Hz, 1H), 4.90 (s, 1H), 4.41 (s, 1H), 3.27 – 2.99 (m, 2H), 2.00 – 1.86 (m, 1H), 1.84 – 1.55 (m, 5H), 1.32 (m, 1H), 1.23 – 0.98 (m, 4H); <sup>13</sup>C NMR (126 MHz, CDCl<sub>3</sub>)  $\delta$  175.7, 153.3, 144.5, 134.3, 132.1, 129.9, 129.6, 129.6, 126.0, 124.9, 122.5, 119.9, 111.4, 98.9, 67.8, 59.0, 41.1, 39.7, 26.7, 26.5, 26.2, 26.1, 26.0;  $[\alpha]_D^{20}$  = –289 ( $c$  = 0.43, CHCl<sub>3</sub>); HPLC: IC column, 85:15 hexanes:isopropanol, 1.00 mL/min,  $t_1$  = minor: 10.48 min,  $t_2$  = major: 12.99 min. 86% ee; HRMS-TOF Calculated for  $[C_{25}H_{24}BrNNaO_2]$ : 472.0888; Found: 472.0880.

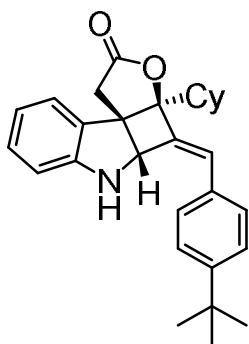

#### Product 2d

Following the general procedure for enantioselective tandem 3,3-rearrangement-[2+2]cyclization reaction with L23\*(AuCl)<sub>2</sub> pre-catalyst, compound 2d, was isolated as white solid in 60% yield.

<sup>1</sup>H NMR (600 MHz, CDCl<sub>3</sub>)  $\delta$  7.41 (d,  $J$  = 8.4 Hz, 2H), 7.33 (d,  $J$  = 8.4 Hz, 2H), 7.20 – 7.11 (m,

2H), 6.83 (m, 1H), 6.68 (d,  $J = 7.8$  Hz, 1H), 6.64 (d,  $J = 1.7$  Hz, 1H), 4.97 – 4.89 (m, 1H), 4.41 (s, 1H), 3.19 – 2.99 (m, 2H), 1.89 (m, 1H), 1.78 – 1.66 (m, 3H), 1.67 – 1.53 (m, 3H), 1.34 (s, 10H), 1.16 – 0.97 (m, 3H);  $^{13}\text{C}$  NMR (151 MHz,  $\text{CDCl}_3$ )  $\delta$  175.9, 153.4, 151.7, 142.4, 132.6, 130.4, 129.5, 128.2, 126.2, 125.9, 124.8, 119.6, 111.2, 99.3, 67.8, 58.8, 41.2, 39.7, 34.9, 31.4, 26.7, 26.6, 26.3, 26.2, 26.1;  $[\alpha]_{\text{D}}^{20} = -411$  ( $c = 0.575$ ,  $\text{CHCl}_3$ ); HPLC: IC column, 85:15 hexanes:isopropanol, 1.00 mL/min,  $t_1 =$  minor: 9.46 min,  $t_2 =$  major: 10.77 min. 94% ee; HRMS-TOF Calculated for  $[\text{C}_{29}\text{H}_{33}\text{NNaO}_2]$ : 450.2409; Found: 450.2394.

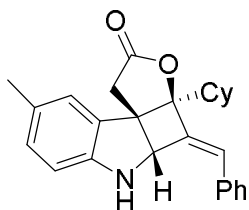

#### Product 2e

Following the general procedure for enantioselective tandem 3,3-rearrangement-[2+2]cyclization reaction with L23\*(AuCl) $_2$  pre-catalyst, compound 2e, was isolated as white solid in 85% yield.

$^1\text{H}$  NMR (600 MHz,  $\text{CDCl}_3$ )  $\delta$  7.44 – 7.36 (m, 4H), 7.30 (m, 1H), 6.99 (d,  $J = 1.6$  Hz, 1H), 6.96 (dd,  $J = 8.1, 1.7$  Hz, 1H), 6.66 (d,  $J = 1.8$  Hz, 1H), 6.62 (d,  $J = 7.9$  Hz, 1H), 4.89 (d,  $J = 1.8$  Hz, 1H), 4.29 (s, 1H), 3.21 – 2.93 (m, 2H), 2.30 (s, 3H), 1.90 (m, 1H), 1.79 – 1.55 (m, 6H), 1.39 – 1.24 (m, 1H), 1.15 – 1.01 (m, 3H);  $^{13}\text{C}$  NMR (151 MHz,  $\text{CDCl}_3$ )  $\delta$  175.9, 151.2, 143.6, 135.4, 130.7, 130.0, 129.3, 128.9, 128.5, 128.4, 126.5, 125.3, 111.4, 99.0, 68.1, 58.9, 41.2, 39.7, 26.8, 26.6, 26.3, 26.2, 26.0, 21.0;  $[\alpha]_{\text{D}}^{20} = -344$  ( $c = 0.65$ ,  $\text{CHCl}_3$ ); HPLC: IC column, 85:15 hexanes:isopropanol, 1.00 mL/min,  $t_1 =$  major: 10.02 min,  $t_2 =$  minor: 11.58 min. 89% ee; HRMS-TOF Calculated for  $[\text{C}_{26}\text{H}_{27}\text{NNaO}_2]$ : 408.1939; Found: 408.1935.

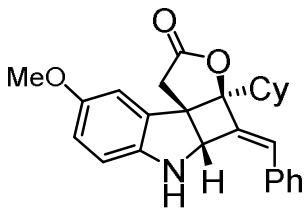

#### Product 2f

Following the general procedure for enantioselective tandem 3,3-rearrangement-[2+2]cyclization reaction with L23\*(AuCl) $_2$  pre-catalyst, compound 2f, was isolated as white solid in 66% yield.

$^1\text{H}$  NMR (500 MHz,  $\text{CDCl}_3$ )  $\delta$  7.44 – 7.35 (m, 4H), 7.34 – 7.28 (m, 1H), 6.79 – 6.71 (m, 2H), 6.69 – 6.64 (m, 2H), 4.90 (d,  $J$  = 1.8 Hz, 1H), 4.18 (s, 1H), 3.77 (s, 3H), 3.20 – 2.97 (m, 2H), 1.90 (m, 1H), 1.80 – 1.55 (m, 5H), 1.40 – 1.23 (m, 1H), 1.20 – 0.98 (m, 4H);  $^{13}\text{C}$  NMR (126 MHz,  $\text{CDCl}_3$ )  $\delta$  175.8, 154.3, 147.2, 143.4, 135.3, 131.0, 128.9, 128.5, 128.4, 127.9, 115.1, 112.6, 111.0, 99.0, 68.5, 59.3, 56.3, 41.2, 39.6, 26.8, 26.7, 26.2, 26.2, 26.1;  $[\alpha]_{\text{D}}^{20}$  = –351 ( $c$  = 1.025,  $\text{CHCl}_3$ ); HPLC: IC column, 85:15 hexanes:isopropanol, 1.00 mL/min,  $t_1$  = minor: 18.48 min,  $t_2$  = major: 20.42 min. 92% ee; HRMS-TOF Calculated for  $[\text{C}_{26}\text{H}_{27}\text{NNaO}_3]$ : 424.1889; Found: 424.1847.

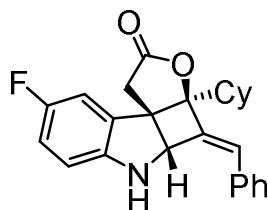

Product 2g

Following the general procedure for enantioselective tandem 3,3-rearrangement-[2+2]cyclization reaction with L23\*(AuCl) $_2$  pre-catalyst, compound 2g, was isolated as white solid in 80% yield.

$^1\text{H}$  NMR (500 MHz,  $\text{CDCl}_3$ )  $\delta$  7.39 (d,  $J$  = 4.4 Hz, 4H), 7.31 (m, 1H), 6.93 – 6.82 (m, 2H), 6.67 (d,  $J$  = 1.8 Hz, 1H), 6.63 (dd,  $J$  = 8.5, 4.3 Hz, 1H), 4.93 (s, 1H), 4.32 (s, 1H), 3.06 (s, 2H), 1.96 – 1.85 (m, 1H), 1.81 – 1.57 (m, 5H), 1.40 – 1.23 (m, 1H), 1.22 – 0.99 (m, 4H);  $^{13}\text{C}$  NMR (126 MHz,  $\text{CDCl}_3$ )  $\delta$  175.4, 158.3, 156.4, 149.5, 143.0, 135.2, 131.0, 128.9, 128.5, 128.5, 127.9, 127.8, 116.1, 116.0, 112.0, 111.9, 111.9, 111.8, 99.0, 68.6, 59.1, 59.1, 41.2, 39.6, 26.8, 26.7, 26.2, 26.1, 26.0;  $^{19}\text{F}$  NMR (376 MHz,  $\text{CDCl}_3$ )  $\delta$  -123.42 (td,  $J$  = 8.4, 4.2 Hz);  $[\alpha]_{\text{D}}^{20}$  = –330 ( $c$  = 0.61,  $\text{CHCl}_3$ ); HPLC: IC column, 85:15 hexanes:isopropanol, 1.00 mL/min,  $t_1$  = minor: 10.61 min,  $t_2$  = major: 17.41 min. 92% ee; HRMS-TOF Calculated for  $[\text{C}_{25}\text{H}_{24}\text{FNNaO}_2]$ : 412.1689; Found: 412.1687.

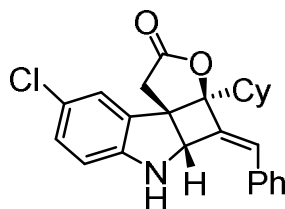

Product 2h

Following the general procedure for enantioselective tandem 3,3-rearrangement-[2+2]cyclization reaction with L23\*(AuCl) $_2$  pre-catalyst, compound 2h, was isolated as white solid in 66% yield.

$^1\text{H}$  NMR (500 MHz,  $\text{CDCl}_3$ )  $\delta$  7.45 – 7.29 (m, 5H), 7.16 – 7.05 (m, 2H), 6.67 (d,  $J$  = 1.7 Hz, 1H), 6.59 (d,  $J$  = 8.4 Hz, 1H), 5.02 – 4.90 (m, 1H), 4.39 (d,  $J$  = 4.1 Hz, 1H), 3.06 (s, 2H), 1.96 – 1.85

(m, 1H), 1.81 – 1.50 (m, 5H), 1.37 – 1.22 (m, 2H), 1.20 – 0.96 (m, 4H);  $^{13}\text{C}$  NMR (126 MHz,  $\text{CDCl}_3$ )  $\delta$  175.3, 152.0, 142.8, 135.2, 131.0, 129.5, 129.0, 128.6, 128.4, 128.0, 124.9, 124.2, 111.9, 99.0, 68.3, 58.8, 41.3, 39.6, 26.8, 26.8, 26.3, 26.2, 26.0);  $[\alpha]_{\text{D}}^{20} = -294$  ( $c = 0.4$ ,  $\text{CHCl}_3$ ); HPLC: IC column, 85:15 hexanes:isopropanol, 1.00 mL/min,  $t_1 =$  minor: 11.21 min,  $t_2 =$  major: 12.21 min. 88% ee; HRMS-TOF Calculated for  $[\text{C}_{25}\text{H}_{24}\text{ClNNaO}_2]$ : 428.1393; Found: 428.1384

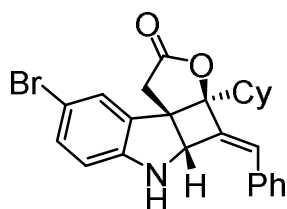

Product 2i

Following the general procedure for enantioselective tandem 3,3-rearrangement-[2+2]cyclization reaction with L23\*(AuCl) $_2$  pre-catalyst, compound 2i, was isolated as white solid in 72% yield.

$^1\text{H}$  NMR (500 MHz,  $\text{CDCl}_3$ )  $\delta$  7.48 – 7.32 (m, 5H), 7.31 – 7.19 (m, 3H), 6.70 (s, 1H), 6.58 (d,  $J = 8.3$  Hz, 1H), 4.97 (q,  $J = 1.8$  Hz, 1H), 4.53 – 4.37 (m, 1H), 3.09 (s, 2H), 1.93 (d,  $J = 12.0$  Hz, 1H), 1.84 – 1.56 (m, 5H), 1.43 – 0.97 (m, 5H);  $^{13}\text{C}$  NMR (126 MHz,  $\text{CDCl}_3$ )  $\delta$  175.3, 152.4, 142.8, 135.2, 132.3, 130.9, 129.0, 128.6, 128.4, 128.4, 127.8, 112.4, 110.9, 99.1, 68.2, 58.7, 41.2, 39.6, 26.8, 26.7, 26.2, 26.1, 26.0;  $[\alpha]_{\text{D}}^{20} = -361$  ( $c = 0.53$ ,  $\text{CHCl}_3$ ); HPLC: IC column, 85:15 hexanes:isopropanol, 1.00 mL/min,  $t_1 =$  major: 11.22 min,  $t_2 =$  minor: 12.05 min. 90% ee; HRMS-TOF Calculated for  $[\text{C}_{25}\text{H}_{24}\text{BrNNaO}_2]$ : 472.0888; Found: 472.0884.

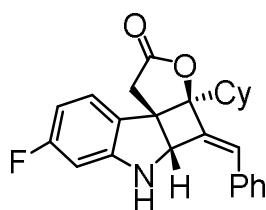

Product 2j

Following the general procedure for enantioselective tandem 3,3-rearrangement-[2+2]cyclization reaction with L23\*(AuCl) $_2$  pre-catalyst, compound 2j, was isolated as white solid in 80% yield.

$^1\text{H}$  NMR (600 MHz,  $\text{CDCl}_3$ )  $\delta$  7.42 – 7.29 (m, 5H), 7.06 (dd,  $J = 8.3, 5.4$  Hz, 1H), 6.67 (d,  $J = 1.8$  Hz, 1H), 6.55 – 6.43 (m, 1H), 6.42 – 6.24 (m, 1H), 4.97 (s, 1H), 4.49 (s, 1H), 3.19 – 2.95 (m, 2H), 1.91 (d,  $J = 12.6$  Hz, 1H), 1.81 – 1.53 (m, 6H), 1.36 – 1.23 (m, 1H), 1.19 – 0.99 (m, 3H);  $^{13}\text{C}$  NMR (151 MHz,  $\text{CDCl}_3$ )  $\delta$  175.5, 165.1, 163.5, 154.9, 154.8, 142.9, 135.3, 130.8, 129.0, 128.6, 128.4, 125.5, 125.5, 121.5, 121.5, 106.0, 105.8, 98.9, 98.5, 98.3, 68.5, 58.0, 41.2, 39.6, 26.8, 26.6, 26.3,

26.1, 26.1;  $^{19}\text{F}$  NMR (376 MHz,  $\text{CDCl}_3$ )  $\delta$  -111.79 (td,  $J = 9.2, 5.0$  Hz);  $[\alpha]_{\text{D}}^{20} = -303$  ( $c = 0.5$ ,  $\text{CHCl}_3$ ); HPLC: IC column, 85:15 hexanes:isopropanol, 1.00 mL/min,  $t_1 =$  minor: 9.72 min,  $t_2 =$  major: 13.50 min. 84% ee; HRMS-TOF Calculated for  $[\text{C}_{25}\text{H}_{24}\text{FNNaO}_2]$ : 412.1689; Found: 412.1685.

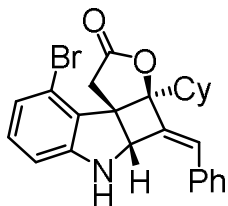

Product 2k

Following the general procedure for enantioselective tandem 3,3-rearrangement-[2+2]cyclization reaction with  $\text{L23}^*(\text{AuCl})_2$  pre-catalyst, compound 2b, was isolated as white solid in 34% yield.

$^1\text{H}$  NMR (600 MHz,  $\text{CDCl}_3$ )  $\delta$  7.43 – 7.37 (m, 2H), 7.37 – 7.30 (m, 3H), 6.99 – 6.94 (m, 1H), 6.90 (dd,  $J = 8.0, 1.0$  Hz, 1H), 6.72 (d,  $J = 1.7$  Hz, 1H), 6.57 (dd,  $J = 7.8, 1.1$  Hz, 1H), 4.87 (dd,  $J = 4.0, 1.8$  Hz, 1H), 4.49 (d,  $J = 4.1$  Hz, 1H), 4.13 (d,  $J = 19.1$  Hz, 1H), 2.83 (d,  $J = 19.1$  Hz, 1H), 2.06 (m, 2H), 1.75 (d,  $J = 10.6$  Hz, 1H), 1.65 – 1.57 (m, 2H), 1.56 (s, 1H), 1.46 – 1.35 (m, 1H), 1.21 – 1.03 (m, 4H);  $^{13}\text{C}$  NMR (151 MHz,  $\text{CDCl}_3$ )  $\delta$  175.6, 155.4, 142.8, 135.3, 131.0, 130.9, 129.0, 128.6, 128.4, 124.5, 124.1, 120.4, 109.6, 99.2, 68.5, 59.5, 42.5, 37.6, 28.4, 27.9, 26.6, 26.4, 26.4;  $[\alpha]_{\text{D}}^{20} = -13.8$  ( $c = 0.66$ ,  $\text{CHCl}_3$ ); HPLC: IC column, 85:15 hexanes:isopropanol, 1.00 mL/min,  $t_1 = 8.54$  min,  $t_2 = 9.23$  min. 3% ee; HRMS-TOF Calculated for  $[\text{C}_{25}\text{H}_{24}\text{BrNNaO}_2]$ : 472.0888; Found: 472.0886.

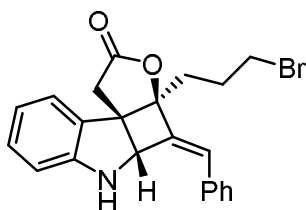

Product 2l

Following the general procedure for enantioselective tandem 3,3-rearrangement-[2+2]cyclization reaction with  $\text{L23}^*(\text{AuCl})_2$  pre-catalyst, compound 2b, was isolated as white solid in 67% yield.

$^1\text{H}$  NMR (600 MHz,  $\text{CDCl}_3$ )  $\delta$  7.40 (d,  $J = 5.7$  Hz, 4H), 7.36 – 7.30 (m, 1H), 7.18 – 7.09 (m, 2H), 6.86 (m, 1H), 6.69 (d,  $J = 7.9$  Hz, 1H), 6.63 (d,  $J = 1.8$  Hz, 1H), 5.02 (d,  $J = 1.8$  Hz, 1H), 3.42 – 3.27 (m, 2H), 3.11 (d,  $J = 2.6$  Hz, 2H), 2.03 – 1.90 (m, 3H), 1.79 (m, 1H);  $^{13}\text{C}$  NMR (126 MHz,  $\text{CDCl}_3$ )  $\delta$  175.8, 154.3, 147.2, 143.4, 135.3, 131.0, 128.9, 128.5, 128.4, 127.9, 115.1, 112.6, 111.0,



99.0, 68.5, 59.3, 56.3, 41.2, 39.6, 26.8, 26.7, 26.2, 26.2, 26.1;  $[\alpha]_D^{20} = -388$  ( $c = 0.38$ ,  $\text{CHCl}_3$ ); HPLC: IC column, 85:15 hexanes:isopropanol, 1.00 mL/min,  $t_1 =$  minor: 13.75 min,  $t_2 =$  major: 16.81 min. 84% ee; HRMS-TOF Calculated for  $[\text{C}_{25}\text{H}_{24}\text{BrNNaO}_2]$ : 432.0575; Found: 432.0570.

## Determination of absolute stereochemistry through VCD experiment

1. VCD Measurement and Calculations
2. Overlay of VCD and IR Spectra
3. Assigned Absolute Configuration
4. Conformations, Electronic Energies, and Coordinates of global and local minima

### *VCD Measurements and Calculations*

Sample was dissolved in  $\text{CDCl}_3$  (48.5 mg/mL final concentration for compound **2g**, and 50 mg/mL for compound **2c**). All experiments were performed using a 0.10-mm path length cell with  $\text{BaF}_2$  windows. The IR and VCD spectra were recorded using a ChiralIR<sup>TM</sup> VCD spectrometer equipped with the Dual PEM accessory (BioTools, Jupiter, FL), with  $4\text{ cm}^{-1}$  resolution. A dry  $\text{N}_2$  purge was used to eliminate water from the instrument. Data was collected in blocks, where the instrument recorded  $\sim 3000$  scans over the course of 1 h and averaged those scans into one block. Each of the runs involved averaging eight blocks for each sample, as well as the solvent. The solvent background average was then subtracted from the sample average. Collection times for sample and solvent ranged were approximately eight hours each.

The general approach for VCD assignment at Merck, including the details computational workflow, has been published elsewhere.<sup>1,2</sup> A subset of the details of the computational methodology is provided here. Conformers of each test structure were geometry optimized at the B3LYP/6-31G\*\* level and stationary points were confirmed by performing frequency calculations.<sup>3-11</sup> All calculations were performed using Gaussian 09.<sup>12</sup> Frequency calculations output the IR and VCD spectra.<sup>13</sup> Frequencies were scaled by a value of 0.98, but owing to the secondary scaling and shifting of the calculated VCD and IR spectra (during extraction of VCD by BioTools ViewVCD and during spectra alignment detailed below) in comparison to the experimental spectra, this initial scaling was, to some extent, arbitrary.

Output conformers were ranked according to DFT energy and a clustering was performed to remove duplicates. Initial identification of duplicates was performed solely on an electronic energy basis where compounds were considered identical if the difference in Hartrees was less

than 0.01. Rounding the differences led to inconsistencies in identification of duplicates. It became better to cluster the DFT minima by energy and then re-cluster each energy bucket by structure using an all atom RMS of 0.6 Å. This faithfully removed only identical compounds. Two Boltzmann distributions were calculated based on electronic energy (E) and free energy (G).

The in-house method for comparing VCD and IR spectra is based on published methodology.<sup>14</sup> We used the same formulas for calculating similarity for IR and VCD spectra of experimental and observed curves. Based on our experience in matching the curves by hand we introduced the following modifications to the algorithm: we scale the spectra (0 to 1 for IR, -1 to 1 for VCD) before comparing them; we isolate each peak for movement rather than groups of peaks; we isolate peaks independently for IR and VCD spectra; when looking for the best match we move the experimental peak only to higher frequencies with a maximum shift of 20 cm<sup>-1</sup>; if the user sees that the baseline of the spectrum is not corrected the user can ask the program to correct the baseline. For all figures contained in the manuscript, the output intensities from Gaussian for IR  $\Delta\epsilon$  (molar absorptivity) and VCD  $\Delta\epsilon$  are D ( $10^{-40}$  esu<sup>2</sup> cm<sup>2</sup>) and R ( $10^{-44}$  esu<sup>2</sup> cm<sup>2</sup>), respectively. However, owing to scaling all peaks the intensities are labeled only as ‘scaled’.

Calculations of the VCD and IR spectra involved modeling the *SSS* configuration (Figures S1-S2) provide the overlays of the calculated and measured IR and VCD spectra. A high degree of confidence is derived from the statistical and visual matching of the spectra. Assigned absolute configuration of the desired compounds is provided in Scheme S1.

*Overlay of VCD and IR Spectra*

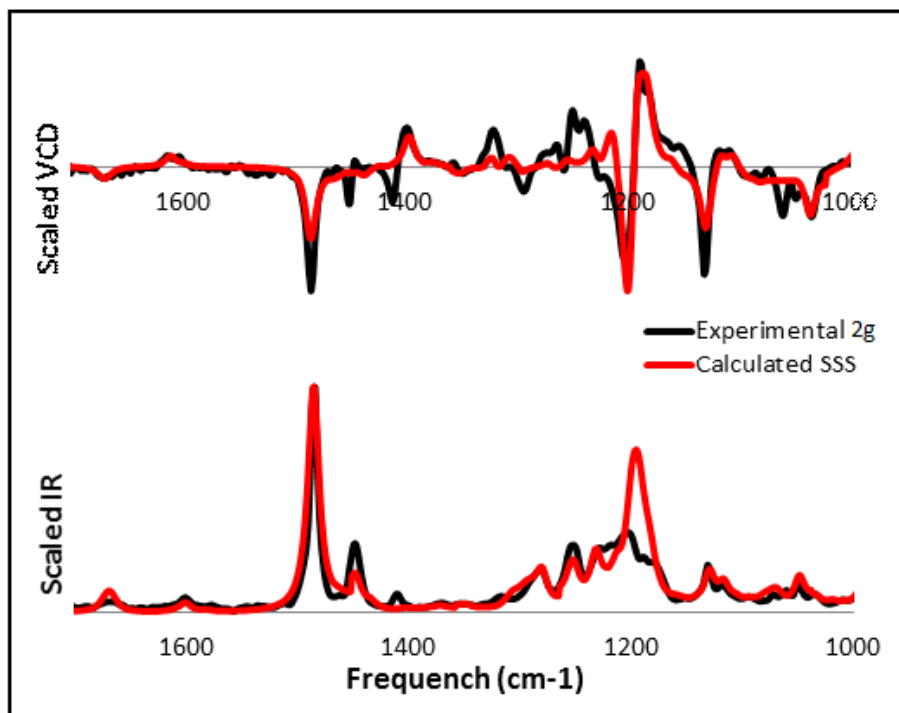

Figure S1: Overlay of measured (black) and calculated (red) VCD and IR spectra for compound 2g.

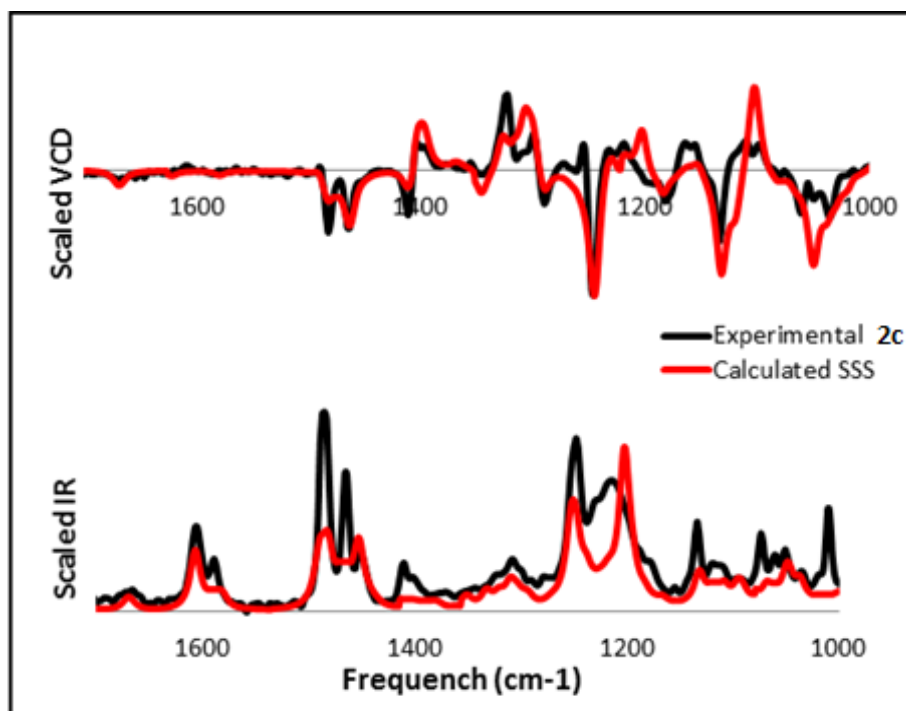

Figure S2: Overlay of measured (black) and calculated (red) VCD and IR spectra for compound 2c.

## Assigned Absolute Configuration

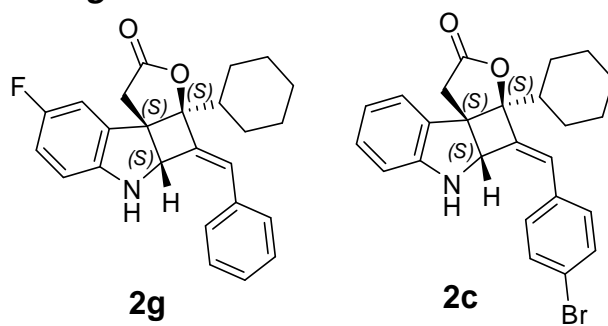

Scheme S1: Assigned absolute configuration of SSS for compounds **2g** and **2c**.

## Conformations, Electronic Energies, and Coordinates of global and local minima Compound 2g:

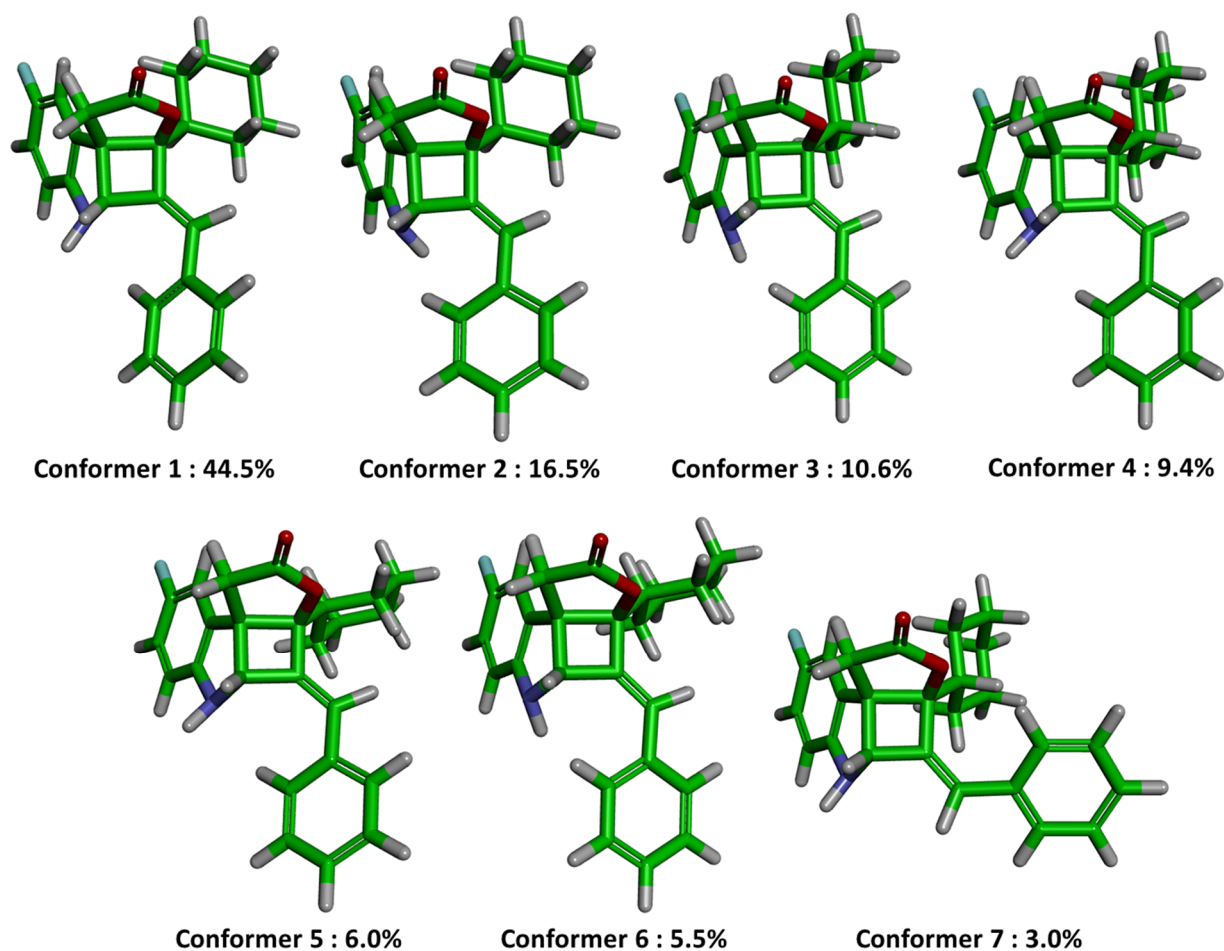

Figure S3: Conformers of the calculated SSS minima of compound **2g** contributing >2% to the Boltzmann distribution, percentages shown above based on *in vacuo* electronic energies.

**Coordinates and electronic energies for B3LYP/6-31G\*\* conformational minima contributing >2% to the *in vacuo* Boltzmann distribution.**

**Conformer 1**

B3LYP/6-31G\*\* Energy = -1272.170154 hartrees

|   |          |          |          |
|---|----------|----------|----------|
| 6 | 3.0256   | 1.49541  | 0.550382 |
| 6 | 3.74825  | 2.40014  | -0.22331 |
| 6 | 3.13757  | 3.24288  | -1.14574 |
| 6 | 1.75146  | 3.19156  | -1.31322 |
| 6 | 1.01161  | 2.29521  | -0.53969 |
| 6 | 1.64495  | 1.43877  | 0.379057 |
| 7 | -0.38338 | 2.11453  | -0.55935 |
| 6 | -0.75655 | 1.19775  | 0.536687 |
| 6 | 0.602932 | 0.617847 | 1.09058  |
| 6 | -1.18596 | -0.21304 | 0.168661 |
| 6 | 0.166766 | -0.82176 | 0.538147 |
| 8 | 0.064321 | -1.69133 | 1.69211  |
| 6 | 0.297698 | -1.0366  | 2.86559  |
| 6 | 0.744235 | 0.398711 | 2.59341  |
| 6 | -2.37261 | -0.78396 | -0.08081 |
| 6 | -3.6535  | -0.09575 | -0.29673 |
| 6 | -3.73213 | 1.18649  | -0.87085 |
| 6 | -4.96474 | 1.81214  | -1.04746 |
| 6 | -6.14304 | 1.17018  | -0.66141 |
| 6 | -6.08176 | -0.11163 | -0.11017 |
| 6 | -4.85121 | -0.74057 | 0.061788 |
| 8 | 0.175864 | -1.57165 | 3.93566  |
| 1 | -1.41967 | 1.69449  | 1.25603  |
| 6 | 0.994748 | -1.51886 | -0.55017 |
| 6 | 0.228902 | -2.67774 | -1.22249 |
| 6 | 1.06089  | -3.34453 | -2.32969 |
| 6 | 2.42373  | -3.82332 | -1.81244 |
| 6 | 3.18749  | -2.67852 | -1.13437 |
| 6 | 2.35268  | -2.02657 | -0.02078 |
| 9 | 5.09102  | 2.46341  | -0.0656  |
| 1 | 1.782    | 0.496071 | 2.93014  |
| 1 | 0.149861 | 1.08582  | 3.20237  |
| 1 | -0.71188 | -2.31044 | -1.64409 |
| 1 | -0.02851 | -3.42355 | -0.45831 |
| 1 | 1.21649  | -2.62344 | -3.14488 |
| 1 | 0.49923  | -4.18198 | -2.76038 |

|   |          |          |          |
|---|----------|----------|----------|
| 1 | 3.01645  | -4.24426 | -2.63331 |
| 1 | 2.27169  | -4.63512 | -1.08721 |
| 1 | 3.44669  | -1.9189  | -1.88528 |
| 1 | 4.13509  | -3.04347 | -0.72089 |
| 1 | 2.91901  | -1.20589 | 0.429945 |
| 1 | 2.16786  | -2.75921 | 0.773851 |
| 1 | 1.18728  | -0.75456 | -1.31705 |
| 1 | 3.55019  | 0.87456  | 1.26909  |
| 1 | 3.74816  | 3.93109  | -1.71981 |
| 1 | 1.26139  | 3.8469   | -2.02654 |
| 1 | -2.41705 | -1.87191 | -0.08093 |
| 1 | -2.82368 | 1.66387  | -1.22222 |
| 1 | -5.00769 | 2.79809  | -1.50164 |
| 1 | -7.10265 | 1.65858  | -0.80234 |
| 1 | -6.99433 | -0.62311 | 0.181621 |
| 1 | -4.80847 | -1.7384  | 0.490292 |
| 1 | -0.92262 | 2.97085  | -0.59468 |

**Conformer 2**

B3LYP/6-31G\*\* Energy = -1272.169216 hartrees

|   |          |          |          |
|---|----------|----------|----------|
| 6 | 3.03663  | 1.52416  | 0.471026 |
| 6 | 3.7347   | 2.35085  | -0.40745 |
| 6 | 3.09327  | 3.12343  | -1.36856 |
| 6 | 1.69753  | 3.10378  | -1.44991 |
| 6 | 0.982878 | 2.2887   | -0.57147 |
| 6 | 1.65007  | 1.48069  | 0.366147 |
| 7 | -0.41803 | 2.21285  | -0.44077 |
| 6 | -0.74263 | 1.24496  | 0.631386 |
| 6 | 0.631531 | 0.673311 | 1.12999  |
| 6 | -1.16927 | -0.14949 | 0.221613 |
| 6 | 0.184603 | -0.7684  | 0.583479 |
| 8 | 0.067472 | -1.62086 | 1.74866  |
| 6 | 0.343645 | -0.96624 | 2.91453  |
| 6 | 0.814186 | 0.458285 | 2.62602  |
| 6 | -2.3451  | -0.70817 | -0.10443 |
| 6 | -3.65365 | -0.06837 | -0.29796 |
| 6 | -4.77662 | -0.90274 | -0.45711 |
| 6 | -6.05216 | -0.37484 | -0.63824 |
| 6 | -6.23755 | 1.00785  | -0.66962 |
| 6 | -5.13509 | 1.85241  | -0.52032 |
| 6 | -3.85886 | 1.32553  | -0.33939 |

|   |          |          |          |
|---|----------|----------|----------|
| 8 | 0.233999 | -1.49576 | 3.98826  |
| 1 | -1.37652 | 1.71935  | 1.39175  |
| 6 | 1.01829  | -1.48539 | -0.48796 |
| 6 | 0.253049 | -2.63734 | -1.17271 |
| 6 | 1.10212  | -3.32372 | -2.25533 |
| 6 | 2.44702  | -3.81565 | -1.705   |
| 6 | 3.20991  | -2.6749  | -1.01938 |
| 6 | 2.35875  | -2.00757 | 0.072253 |
| 9 | 5.0845   | 2.39758  | -0.32095 |
| 1 | 1.86258  | 0.533769 | 2.93391  |
| 1 | 0.250652 | 1.16001  | 3.24771  |
| 1 | -0.66954 | -2.25889 | -1.62369 |
| 1 | -0.03722 | -3.3737  | -0.41126 |
| 1 | 1.28538  | -2.61087 | -3.07211 |
| 1 | 0.539288 | -4.15695 | -2.69261 |
| 1 | 3.05145  | -4.2505  | -2.50983 |
| 1 | 2.26891  | -4.61951 | -0.97705 |
| 1 | 3.49369  | -1.92336 | -1.76946 |
| 1 | 4.14417  | -3.04783 | -0.58347 |
| 1 | 2.92449  | -1.19157 | 0.532483 |
| 1 | 2.14783  | -2.73424 | 0.865574 |
| 1 | 1.24013  | -0.72848 | -1.25433 |
| 1 | 3.5872   | 0.938073 | 1.19937  |
| 1 | 3.68591  | 3.74746  | -2.02841 |
| 1 | 1.18208  | 3.7296   | -2.1716  |
| 1 | -2.35848 | -1.79064 | -0.21448 |
| 1 | -4.639   | -1.98049 | -0.43148 |
| 1 | -6.90048 | -1.04261 | -0.75572 |
| 1 | -7.22985 | 1.42455  | -0.81353 |
| 1 | -5.26889 | 2.92988  | -0.54943 |
| 1 | -3.02429 | 2.00953  | -0.23825 |
| 1 | -0.92899 | 2.07525  | -1.3053  |

### Conformer 3

B3LYP/6-31G\*\* Energy = -1272.168797 hartrees

|   |          |         |          |
|---|----------|---------|----------|
| 6 | 2.68434  | 1.61366 | 0.363366 |
| 6 | 3.01292  | 2.759   | -0.35901 |
| 6 | 2.05074  | 3.66571 | -0.78931 |
| 6 | 0.706608 | 3.4497  | -0.47166 |
| 6 | 0.361165 | 2.31187 | 0.260096 |
| 6 | 1.34228  | 1.38013 | 0.646157 |

|   |          |          |          |
|---|----------|----------|----------|
| 7 | -0.90391 | 1.98129  | 0.767395 |
| 6 | -0.84037 | 0.637408 | 1.35673  |
| 6 | 0.685923 | 0.239245 | 1.38218  |
| 6 | -1.12008 | -0.56629 | 0.465369 |
| 6 | 0.29291  | -1.11252 | 0.625282 |
| 8 | 0.292507 | -2.11154 | 1.69491  |
| 6 | 0.811631 | -1.65406 | 2.87085  |
| 6 | 1.27662  | -0.21199 | 2.70844  |
| 6 | -2.15267 | -1.00105 | -0.26884 |
| 6 | -3.49638 | -0.42036 | -0.40297 |
| 6 | -4.30818 | -0.84739 | -1.46992 |
| 6 | -5.5839  | -0.32244 | -1.66193 |
| 6 | -6.08476 | 0.638781 | -0.78274 |
| 6 | -5.30023 | 1.06218  | 0.292691 |
| 6 | -4.02325 | 0.539695 | 0.483241 |
| 8 | 0.872767 | -2.34345 | 3.85483  |
| 1 | -1.34569 | 0.614119 | 2.3306   |
| 6 | 1.02734  | -1.73945 | -0.56825 |
| 6 | 2.47354  | -2.15696 | -0.22753 |
| 6 | 3.13719  | -2.89958 | -1.39782 |
| 6 | 3.09149  | -2.07762 | -2.69295 |
| 6 | 1.65463  | -1.65401 | -3.02784 |
| 6 | 0.997881 | -0.898   | -1.86145 |
| 9 | 4.31393  | 2.99093  | -0.65418 |
| 1 | 2.37274  | -0.20326 | 2.69459  |
| 1 | 0.958172 | 0.385328 | 3.56662  |
| 1 | 2.47962  | -2.78901 | 0.665471 |
| 1 | 3.06326  | -1.25997 | 0.005067 |
| 1 | 2.61757  | -3.85518 | -1.55612 |
| 1 | 4.17271  | -3.14952 | -1.13871 |
| 1 | 3.5236   | -2.6499  | -3.52237 |
| 1 | 3.7141   | -1.17957 | -2.5746  |
| 1 | 1.05987  | -2.54882 | -3.26222 |
| 1 | 1.6415   | -1.0279  | -3.92769 |
| 1 | -0.03236 | -0.63382 | -2.11982 |
| 1 | 1.53106  | 0.045092 | -1.69945 |
| 1 | 0.468405 | -2.66774 | -0.77036 |
| 1 | 3.47213  | 0.93332  | 0.669008 |
| 1 | 2.36066  | 4.53862  | -1.35337 |
| 1 | -0.04921 | 4.16681  | -0.77631 |
| 1 | -1.98122 | -1.88986 | -0.87595 |
| 1 | -3.92507 | -1.59774 | -2.1565  |
| 1 | -6.18826 | -0.66629 | -2.49616 |



|   |          |          |          |
|---|----------|----------|----------|
| 1 | -7.07987 | 1.04813  | -0.92789 |
| 1 | -5.68814 | 1.79679  | 0.992367 |
| 1 | -3.44669 | 0.860211 | 1.34393  |
| 1 | -1.70352 | 2.16861  | 0.174639 |

### Conformer 4

B3LYP/6-31G\*\* Energy = -1272.168679 hartrees

|   |          |          |          |
|---|----------|----------|----------|
| 6 | 2.95986  | 1.25742  | 0.606963 |
| 6 | 3.6038   | 2.31041  | -0.03693 |
| 6 | 2.90602  | 3.34449  | -0.65312 |
| 6 | 1.50943  | 3.33755  | -0.63549 |
| 6 | 0.84794  | 2.29151  | 0.010314 |
| 6 | 1.56696  | 1.24671  | 0.617202 |
| 7 | -0.54693 | 2.12851  | 0.134809 |
| 6 | -0.80177 | 0.935205 | 0.963722 |
| 6 | 0.609991 | 0.289909 | 1.27626  |
| 6 | -1.21558 | -0.35352 | 0.265427 |
| 6 | 0.111577 | -1.0468  | 0.555386 |
| 8 | -0.05546 | -2.01408 | 1.63551  |
| 6 | 0.310604 | -1.53201 | 2.85517  |
| 6 | 0.910507 | -0.13884 | 2.70776  |
| 6 | -2.34601 | -0.84965 | -0.25466 |
| 6 | -3.63876 | -0.17393 | -0.42912 |
| 6 | -4.81492 | -0.94592 | -0.4341  |
| 6 | -6.06453 | -0.3466  | -0.56954 |
| 6 | -6.16367 | 1.03796  | -0.72184 |
| 6 | -5.00309 | 1.81433  | -0.74603 |
| 6 | -3.752   | 1.21773  | -0.60357 |
| 8 | 0.175844 | -2.1698  | 3.86665  |
| 1 | -1.4275  | 1.18896  | 1.82808  |
| 6 | 0.83509  | -1.77606 | -0.58602 |
| 6 | 0.973611 | -0.954   | -1.88332 |
| 6 | 1.57498  | -1.8072  | -3.01158 |
| 6 | 2.92617  | -2.41272 | -2.60472 |
| 6 | 2.80762  | -3.21106 | -1.29865 |
| 6 | 2.19651  | -2.3675  | -0.16838 |
| 9 | 4.95657  | 2.32987  | -0.05824 |
| 1 | 1.98795  | -0.21377 | 2.89554  |
| 1 | 0.499772 | 0.528105 | 3.47048  |
| 1 | 1.62372  | -0.09011 | -1.70527 |
| 1 | -0.0011  | -0.55796 | -2.18595 |

|   |          |          |          |
|---|----------|----------|----------|
| 1 | 1.68772  | -1.19834 | -3.91627 |
| 1 | 0.876361 | -2.61708 | -3.26641 |
| 1 | 3.65677  | -1.60293 | -2.46829 |
| 1 | 3.31494  | -3.05146 | -3.40673 |
| 1 | 3.78946  | -3.58982 | -0.99116 |
| 1 | 2.17406  | -4.0929  | -1.46933 |
| 1 | 2.88663  | -1.55027 | 0.079795 |
| 1 | 2.07803  | -2.97713 | 0.732443 |
| 1 | 0.174306 | -2.62858 | -0.81462 |
| 1 | 3.55229  | 0.484882 | 1.08572  |
| 1 | 3.45895  | 4.1414   | -1.13807 |
| 1 | 0.951076 | 4.13704  | -1.11231 |
| 1 | -2.32848 | -1.89995 | -0.54762 |
| 1 | -4.74192 | -2.02387 | -0.31621 |
| 1 | -6.96097 | -0.95969 | -0.56084 |
| 1 | -7.13687 | 1.50659  | -0.83421 |
| 1 | -5.07293 | 2.88899  | -0.8895  |
| 1 | -2.84974 | 1.81557  | -0.67303 |
| 1 | -1.03822 | 2.96033  | 0.440069 |

### Conformer 5

B3LYP/6-31G\*\* Energy = -1272.168259 hartrees

|   |          |          |          |
|---|----------|----------|----------|
| 6 | 3.19357  | -1.13816 | -0.4069  |
| 6 | 3.91129  | -1.99787 | 0.420748 |
| 6 | 3.29257  | -2.97683 | 1.19187  |
| 6 | 1.90182  | -3.10847 | 1.15443  |
| 6 | 1.16644  | -2.25646 | 0.32908  |
| 6 | 1.80855  | -1.27463 | -0.44589 |
| 7 | -0.23547 | -2.22657 | 0.177245 |
| 6 | -0.57052 | -1.20892 | -0.83858 |
| 6 | 0.790821 | -0.53524 | -1.26823 |
| 6 | -1.0746  | 0.155197 | -0.37492 |
| 6 | 0.21152  | 0.870808 | -0.78794 |
| 8 | 0.006971 | 1.62631  | -2.01747 |
| 6 | 0.426378 | 0.971697 | -3.1356  |
| 6 | 1.08504  | -0.34715 | -2.75134 |
| 6 | -2.25401 | 0.643212 | 0.033931 |
| 6 | -3.48894 | -0.1006  | 0.31877  |
| 6 | -4.72681 | 0.548985 | 0.159572 |
| 6 | -5.92364 | -0.12274 | 0.39515  |
| 6 | -5.90784 | -1.45494 | 0.813541 |

|   |          |          |          |
|---|----------|----------|----------|
| 6 | -4.6861  | -2.10455 | 1.00177  |
| 6 | -3.48716 | -1.43678 | 0.759941 |
| 8 | 0.285208 | 1.42899  | -4.23945 |
| 1 | -1.17809 | -1.64838 | -1.63885 |
| 6 | 0.98646  | 1.7669   | 0.196849 |
| 6 | 0.456979 | 3.21994  | 0.217106 |
| 6 | 1.30376  | 4.11346  | 1.13608  |
| 6 | 1.38126  | 3.55535  | 2.56307  |
| 6 | 1.87591  | 2.10276  | 2.55915  |
| 6 | 1.02817  | 1.21238  | 1.63655  |
| 9 | 5.25785  | -1.878   | 0.47286  |
| 1 | 2.15929  | -0.26253 | -2.95167 |
| 1 | 0.705956 | -1.15154 | -3.38747 |
| 1 | -0.5817  | 3.22019  | 0.576616 |
| 1 | 0.439117 | 3.62684  | -0.7964  |
| 1 | 0.893027 | 5.13005  | 1.14366  |
| 1 | 2.31941  | 4.19279  | 0.722785 |
| 1 | 0.382887 | 3.59503  | 3.02171  |
| 1 | 2.03449  | 4.18037  | 3.18362  |
| 1 | 1.86552  | 1.69291  | 3.57599  |
| 1 | 2.92293  | 2.07576  | 2.2253   |
| 1 | 0.002682 | 1.15944  | 2.02362  |
| 1 | 1.41959  | 0.1925   | 1.65164  |
| 1 | 2.02054  | 1.80395  | -0.18264 |
| 1 | 3.72312  | -0.39761 | -0.99757 |
| 1 | 3.90158  | -3.62203 | 1.81543  |
| 1 | 1.40658  | -3.86192 | 1.75887  |
| 1 | -2.33311 | 1.72588  | 0.126881 |
| 1 | -4.74333 | 1.58602  | -0.16525 |
| 1 | -6.86885 | 0.394042 | 0.257085 |
| 1 | -6.84005 | -1.9783  | 1.00445  |
| 1 | -4.66737 | -3.133   | 1.3515   |
| 1 | -2.53938 | -1.92694 | 0.954644 |
| 1 | -0.6602  | -3.13214 | 0.015642 |

### Conformer 6

B3LYP/6-31G\*\* Energy = -1272.168182 hartrees

|   |          |          |          |
|---|----------|----------|----------|
| 6 | -2.96493 | -1.47959 | 0.052887 |
| 6 | -3.38145 | -2.39866 | -0.90886 |
| 6 | -2.49839 | -3.27816 | -1.52464 |
| 6 | -1.14651 | -3.26942 | -1.16525 |

|   |          |          |          |
|---|----------|----------|----------|
| 6 | -0.71296 | -2.36021 | -0.19913 |
| 6 | -1.61558 | -1.45454 | 0.387771 |
| 7 | 0.57057  | -2.25281 | 0.357865 |
| 6 | 0.613145 | -1.06514 | 1.2238   |
| 6 | -0.8734  | -0.56568 | 1.34934  |
| 6 | 0.993438 | 0.282139 | 0.615021 |
| 6 | -0.38539 | 0.880528 | 0.886401 |
| 8 | -0.34741 | 1.64033  | 2.13376  |
| 6 | -0.91367 | 0.990499 | 3.1912   |
| 6 | -1.44822 | -0.36287 | 2.74228  |
| 6 | 2.08121  | 0.780799 | 0.011698 |
| 6 | 3.37898  | 0.134097 | -0.23176 |
| 6 | 3.79738  | -1.0499  | 0.406911 |
| 6 | 5.03761  | -1.61552 | 0.1208   |
| 6 | 5.89284  | -1.01482 | -0.80598 |
| 6 | 5.50008  | 0.165818 | -1.43798 |
| 6 | 4.26134  | 0.733416 | -1.14965 |
| 8 | -0.95828 | 1.47581  | 4.29085  |
| 1 | 1.11298  | -1.29413 | 2.17346  |
| 6 | -1.15573 | 1.71156  | -0.1561  |
| 6 | -1.03724 | 1.17484  | -1.5992  |
| 6 | -1.91001 | 1.98515  | -2.57079 |
| 6 | -1.56802 | 3.48036  | -2.53055 |
| 6 | -1.64611 | 4.02606  | -1.09828 |
| 6 | -0.77944 | 3.21174  | -0.12576 |
| 9 | -4.68937 | -2.429   | -1.25731 |
| 1 | -2.54342 | -0.31747 | 2.73515  |
| 1 | -1.16305 | -1.13618 | 3.46022  |
| 1 | -1.31414 | 0.119179 | -1.64648 |
| 1 | 0.010544 | 1.23753  | -1.91896 |
| 1 | -2.96825 | 1.84638  | -2.30804 |
| 1 | -1.79044 | 1.59307  | -3.58762 |
| 1 | -2.23697 | 4.04409  | -3.19161 |
| 1 | -0.5495  | 3.6277   | -2.91761 |
| 1 | -2.69074 | 3.9983   | -0.75651 |
| 1 | -1.34104 | 5.07886  | -1.07231 |
| 1 | -0.87824 | 3.60226  | 0.889424 |
| 1 | 0.277747 | 3.3279   | -0.40341 |
| 1 | -2.21565 | 1.64175  | 0.139221 |
| 1 | -3.68861 | -0.80285 | 0.495668 |
| 1 | -2.87542 | -3.97055 | -2.26936 |
| 1 | -0.45459 | -3.96839 | -1.62461 |
| 1 | 2.00477  | 1.79402  | -0.3791  |

|   |         |          |          |
|---|---------|----------|----------|
| 1 | 3.16609 | -1.51892 | 1.15317  |
| 1 | 5.34139 | -2.52532 | 0.630374 |
| 1 | 6.85878 | -1.45894 | -1.02643 |
| 1 | 6.16003 | 0.647138 | -2.15367 |
| 1 | 3.96309 | 1.65483  | -1.64293 |
| 1 | 1.35655 | -2.37372 | -0.2693  |

### Conformer 7

B3LYP/6-31G\*\* Energy = -1272.167594 hartrees

|   |          |          |          |
|---|----------|----------|----------|
| 6 | -3.38669 | -0.0059  | 0.349514 |
| 6 | -4.43623 | 0.379111 | -0.48124 |
| 6 | -4.46439 | 0.064766 | -1.83555 |
| 6 | -3.41014 | -0.66026 | -2.39748 |
| 6 | -2.35176 | -1.05774 | -1.57774 |
| 6 | -2.33136 | -0.71922 | -0.21153 |
| 7 | -1.21407 | -1.78527 | -1.95773 |
| 6 | -0.43425 | -2.10991 | -0.75248 |
| 6 | -1.11025 | -1.32051 | 0.43487  |
| 6 | 0.851316 | -1.32535 | -0.53183 |
| 6 | 0.260193 | -0.50913 | 0.620588 |
| 8 | 0.795096 | -0.96294 | 1.90016  |
| 6 | -0.00105 | -1.87205 | 2.5317   |
| 6 | -1.30444 | -2.04395 | 1.76311  |
| 6 | 2.0261   | -1.40508 | -1.17004 |
| 6 | 3.28467  | -0.68617 | -0.91418 |
| 6 | 4.14938  | -0.42983 | -1.9936  |
| 6 | 5.35138  | 0.247957 | -1.80458 |
| 6 | 5.72392  | 0.66567  | -0.52548 |
| 6 | 4.88876  | 0.392726 | 0.560074 |
| 6 | 3.68213  | -0.27925 | 0.373121 |
| 8 | 0.326328 | -2.40884 | 3.55709  |
| 1 | -0.33768 | -3.19566 | -0.62278 |
| 6 | 0.377183 | 1.02361  | 0.596465 |
| 6 | 0.002921 | 1.66793  | -0.75393 |
| 6 | 0.275961 | 3.18063  | -0.73192 |
| 6 | -0.46011 | 3.87335  | 0.423593 |
| 6 | -0.11546 | 3.22255  | 1.77049  |
| 6 | -0.37742 | 1.70752  | 1.75515  |
| 9 | -5.466   | 1.07754  | 0.052242 |
| 1 | -2.10782 | -1.59749 | 2.36005  |
| 1 | -1.53864 | -3.10719 | 1.66154  |

|   |          |          |          |
|---|----------|----------|----------|
| 1 | -1.05894 | 1.50017  | -0.96619 |
| 1 | 0.565945 | 1.19693  | -1.56576 |
| 1 | -0.01875 | 3.62336  | -1.69065 |
| 1 | 1.3568   | 3.35165  | -0.6283  |
| 1 | -1.54403 | 3.80327  | 0.254809 |
| 1 | -0.21638 | 4.9423   | 0.445088 |
| 1 | -0.6892  | 3.68999  | 2.57955  |
| 1 | 0.945013 | 3.40079  | 1.99811  |
| 1 | -0.07551 | 1.26698  | 2.71061  |
| 1 | -1.45524 | 1.53525  | 1.64254  |
| 1 | 1.44728  | 1.21888  | 0.753335 |
| 1 | -3.42155 | 0.250903 | 1.40306  |
| 1 | -5.30829 | 0.385837 | -2.43625 |
| 1 | -3.42163 | -0.91364 | -3.453   |
| 1 | 2.05885  | -2.08978 | -2.01961 |
| 1 | 3.86506  | -0.75751 | -2.99034 |
| 1 | 5.99952  | 0.444979 | -2.65358 |
| 1 | 6.66397  | 1.18787  | -0.37377 |
| 1 | 5.1836   | 0.693351 | 1.5613   |
| 1 | 3.05741  | -0.51883 | 1.22677  |
| 1 | -1.37097 | -2.54798 | -2.60332 |

**Compound 2c:**

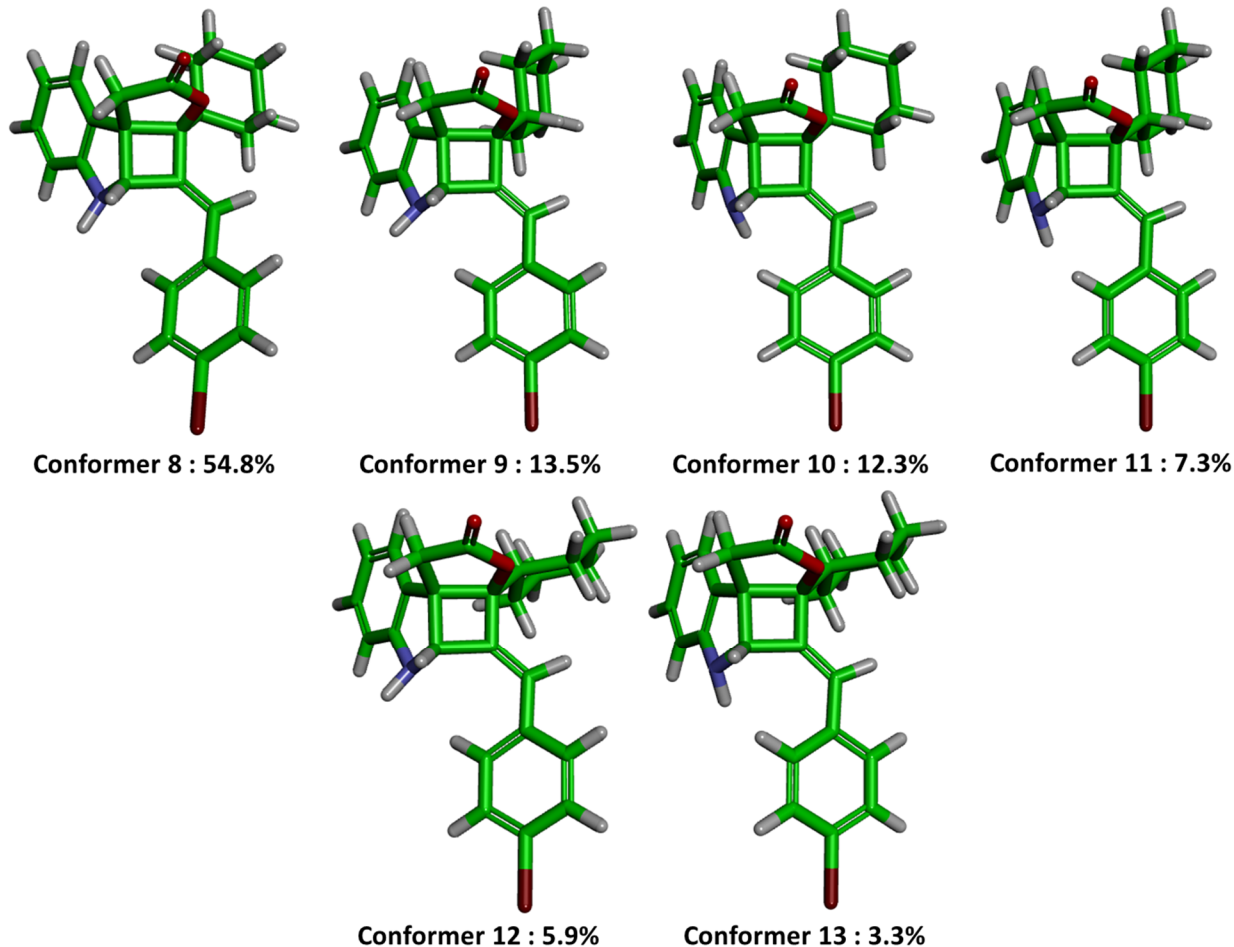

Figure S4: Conformers of the calculated SSS minima of compound **2c** contributing >2% to the Boltzmann distribution, percentages shown above based on *in vacuo* electronic energies.

**Coordinates and electronic energies for B3LYP/6-31G\*\* conformational minima contributing >2% to the *in vacuo* Boltzmann distribution.**

***Compound 2c***

**Conformer 8**

B3LYP/6-31G\*\* Energy = -3744.076920 hartrees

|   |         |         |          |
|---|---------|---------|----------|
| 6 | 4.01874 | 2.19795 | 0.515595 |
| 6 | 4.53792 | 3.24503 | -0.25674 |
| 6 | 3.71034 | 3.92961 | -1.15202 |
| 6 | 2.36153 | 3.59052 | -1.29455 |

|    |           |           |           |
|----|-----------|-----------|-----------|
| 6  | 1.85407   | 2.54531   | -0.518368 |
| 6  | 2.68113   | 1.83996   | 0.377275  |
| 7  | 0.539859  | 2.06032   | -0.513033 |
| 6  | 0.385466  | 1.09941   | 0.596252  |
| 6  | 1.85242   | 0.807822  | 1.09735   |
| 6  | 0.239624  | -0.37032  | 0.232767  |
| 6  | 1.70869   | -0.680272 | 0.522914  |
| 8  | 1.84443   | -1.57401  | 1.66291   |
| 6  | 1.98013   | -0.900854 | 2.83448   |
| 6  | 2.08166   | 0.596772  | 2.59168   |
| 6  | -0.806856 | -1.18766  | 0.047605  |
| 6  | -2.22154  | -0.80231  | -0.060633 |
| 6  | -2.63748  | 0.440672  | -0.572265 |
| 6  | -3.98791  | 0.77722   | -0.640304 |
| 6  | -4.93923  | -0.139091 | -0.195884 |
| 6  | -4.56465  | -1.38757  | 0.297648  |
| 6  | -3.21189  | -1.71246  | 0.353184  |
| 35 | -6.79863  | 0.317241  | -0.282661 |
| 8  | 2.02815   | -1.47871  | 3.89466   |
| 1  | -0.339014 | 1.46071   | 1.33551   |
| 6  | 2.61863   | -1.16462  | -0.612587 |
| 6  | 2.09432   | -2.43775  | -1.31013  |
| 6  | 3.00725   | -2.85733  | -2.47368  |
| 6  | 4.46262   | -3.04436  | -2.02409  |
| 6  | 4.9863    | -1.79227  | -1.30718  |
| 6  | 4.07159   | -1.38647  | -0.142093 |
| 1  | 1.36165   | 1.11812   | 3.2292    |
| 1  | 3.07997   | 0.919415  | 2.9068    |
| 1  | 2.03833   | -3.25353  | -0.576373 |
| 1  | 1.07876   | -2.2716   | -1.68325  |
| 1  | 2.62664   | -3.78048  | -2.92741  |
| 1  | 2.96636   | -2.08575  | -3.25575  |
| 1  | 4.52234   | -3.90274  | -1.34002  |
| 1  | 5.09809   | -3.28544  | -2.88507  |
| 1  | 6.00417   | -1.9639   | -0.93624  |
| 1  | 5.05023   | -0.961221 | -2.02352  |
| 1  | 4.08027   | -2.17685  | 0.618575  |
| 1  | 4.46075   | -0.482359 | 0.335905  |
| 1  | 2.61815   | -0.355917 | -1.35684  |
| 1  | 4.65716   | 1.68062   | 1.22686   |
| 1  | 5.58139   | 3.52693   | -0.155487 |
| 1  | 4.11717   | 4.74382   | -1.74552  |
| 1  | 1.71985   | 4.13142   | -1.984    |



|   |           |          |           |
|---|-----------|----------|-----------|
| 1 | -0.613606 | -2.25897 | 0.025246  |
| 1 | -1.90135  | 1.1354   | -0.961153 |
| 1 | -4.29432  | 1.73541  | -1.04526  |
| 1 | -5.3142   | -2.09614 | 0.631634  |
| 1 | -2.91634  | -2.68526 | 0.736227  |
| 1 | -0.187014 | 2.76274  | -0.583633 |

### Conformer 9

B3LYP/6-31G\*\* Energy = -3744.075598 hartrees

|    |           |           |           |
|----|-----------|-----------|-----------|
| 6  | -3.9915   | 1.96874   | -0.185257 |
| 6  | -4.31605  | 3.12773   | 0.529531  |
| 6  | -3.30226  | 3.98141   | 0.977418  |
| 6  | -1.95737  | 3.69723   | 0.726992  |
| 6  | -1.64428  | 2.53788   | 0.012963  |
| 6  | -2.65461  | 1.6656    | -0.433522 |
| 7  | -0.357136 | 2.09602   | -0.340059 |
| 6  | -0.491122 | 0.874168  | -1.14984  |
| 6  | -2.03855  | 0.547935  | -1.23574  |
| 6  | -0.268398 | -0.468194 | -0.458846 |
| 6  | -1.72884  | -0.881845 | -0.605027 |
| 8  | -1.85493  | -1.80563  | -1.74227  |
| 6  | -2.32667  | -1.21199  | -2.86618  |
| 6  | -2.64004  | 0.249495  | -2.60434  |
| 6  | 0.770618  | -1.16916  | 0.017379  |
| 6  | 2.18713   | -0.787815 | 0.090632  |
| 6  | 2.63188   | 0.54752   | 0.089329  |
| 6  | 3.98945   | 0.854155  | 0.144931  |
| 6  | 4.92022   | -0.181722 | 0.20756   |
| 6  | 4.51526   | -1.51469  | 0.231648  |
| 6  | 3.15458   | -1.8061   | 0.181566  |
| 35 | 6.79      | 0.235608  | 0.277859  |
| 8  | -2.46565  | -1.82784  | -3.89757  |
| 1  | 0.040229  | 0.975641  | -2.10245  |
| 6  | -2.46155  | -1.5376   | 0.573963  |
| 6  | -2.30608  | -0.793754 | 1.9161    |
| 6  | -2.95534  | -1.58434  | 3.06343   |
| 6  | -4.43347  | -1.88621  | 2.78029   |
| 6  | -4.60622  | -2.6014   | 1.43331   |
| 6  | -3.94962  | -1.8217   | 0.282755  |
| 1  | -2.24075  | 0.870235  | -3.41112  |

|   |          |           |           |
|---|----------|-----------|-----------|
| 1 | -3.72972 | 0.37084   | -2.60982  |
| 1 | -1.24703 | -0.620352 | 2.13249   |
| 1 | -2.77946 | 0.192345  | 1.84867   |
| 1 | -2.41285 | -2.53029  | 3.20455   |
| 1 | -2.85409 | -1.02415  | 4.00081   |
| 1 | -4.86026 | -2.49194  | 3.58912   |
| 1 | -4.9973  | -0.942723 | 2.76444   |
| 1 | -4.15239 | -3.60088  | 1.49315   |
| 1 | -5.67013 | -2.75603  | 1.21634   |
| 1 | -4.04974 | -2.38551  | -0.650335 |
| 1 | -4.47991 | -0.870507 | 0.144686  |
| 1 | -1.9653  | -2.51484  | 0.689031  |
| 1 | -4.78157 | 1.31831   | -0.550498 |
| 1 | -5.35589 | 3.3667    | 0.730252  |
| 1 | -3.56074 | 4.88163   | 1.5281    |
| 1 | -1.17187 | 4.36335   | 1.07179   |
| 1 | 0.555476 | -2.17869  | 0.36859   |
| 1 | 1.90766  | 1.35399   | 0.089585  |
| 1 | 4.31622  | 1.88822   | 0.151261  |
| 1 | 5.24591  | -2.3134   | 0.291296  |
| 1 | 2.8361   | -2.84468  | 0.201467  |
| 1 | 0.239279 | 2.81004   | -0.743525 |

### Conformer 10

B3LYP/6-31G\*\* Energy = -3744.075509 hartrees

|   |           |           |           |
|---|-----------|-----------|-----------|
| 6 | 3.99806   | 2.21959   | -0.025059 |
| 6 | 4.35102   | 3.17507   | -0.9881   |
| 6 | 3.35714   | 3.80992   | -1.73789  |
| 6 | 2.00245   | 3.5333    | -1.52653  |
| 6 | 1.66165   | 2.59114   | -0.552735 |
| 6 | 2.65695   | 1.90863   | 0.173648  |
| 7 | 0.375194  | 2.2591    | -0.116539 |
| 6 | 0.460293  | 1.17403   | 0.877511  |
| 6 | 1.99497   | 0.911305  | 1.09506   |
| 6 | 0.286853  | -0.258968 | 0.401736  |
| 6 | 1.76975   | -0.593209 | 0.595672  |
| 8 | 1.93245   | -1.41775  | 1.79046   |
| 6 | 2.29267   | -0.697307 | 2.88455   |
| 6 | 2.49988   | 0.764734  | 2.52378   |
| 6 | -0.766218 | -1.03224  | 0.092368  |
| 6 | -2.19273  | -0.685212 | 0.024199  |
| 6 | -2.72344  | 0.592086  | 0.295412  |

|    |           |           |           |
|----|-----------|-----------|-----------|
| 6  | -4.09105  | 0.839012  | 0.211413  |
| 6  | -4.95225  | -0.195439 | -0.152203 |
| 6  | -4.4662   | -1.47091  | -0.42871  |
| 6  | -3.09661  | -1.70316  | -0.337081 |
| 35 | -6.83305  | 0.145318  | -0.273117 |
| 8  | 2.42913   | -1.21727  | 3.96675   |
| 1  | -0.117274 | 1.42659   | 1.77516   |
| 6  | 2.62086   | -1.1793   | -0.539844 |
| 6  | 2.05079   | -2.48731  | -1.12887  |
| 6  | 2.92608   | -3.03029  | -2.27096  |
| 6  | 4.38726   | -3.21516  | -1.84295  |
| 6  | 4.95559   | -1.91669  | -1.25674  |
| 6  | 4.08594   | -1.39783  | -0.101956 |
| 1  | 1.98357   | 1.40085   | 3.2482    |
| 1  | 3.57083   | 0.981869  | 2.60755   |
| 1  | 1.97757   | -3.24053  | -0.332524 |
| 1  | 1.03838   | -2.31956  | -1.50743  |
| 1  | 2.51055   | -3.97885  | -2.63268  |
| 1  | 2.88416   | -2.32972  | -3.11724  |
| 1  | 4.44615   | -4.00872  | -1.08459  |
| 1  | 4.99324   | -3.54868  | -2.69414  |
| 1  | 5.982     | -2.07447  | -0.903685 |
| 1  | 5.00918   | -1.15206  | -2.04458  |
| 1  | 4.10531   | -2.12653  | 0.717572  |
| 1  | 4.50928   | -0.468509 | 0.291544  |
| 1  | 2.61247   | -0.423771 | -1.33784  |
| 1  | 4.7723    | 1.72489   | 0.554567  |
| 1  | 5.39636   | 3.41765   | -1.15226  |
| 1  | 3.63644   | 4.54381   | -2.48901  |
| 1  | 1.23238   | 4.05164   | -2.09049  |
| 1  | -0.560804 | -2.07575  | -0.133171 |
| 1  | -2.07794  | 1.41312   | 0.58207   |
| 1  | -4.48029  | 1.82774   | 0.427328  |
| 1  | -5.1408   | -2.27173  | -0.709644 |
| 1  | -2.71743  | -2.69913  | -0.548407 |
| 1  | -0.346262 | 2.17539   | -0.823357 |

### Conformer 11

B3LYP/6-31G\*\* Energy = -3744.075018 hartrees

|   |          |        |          |
|---|----------|--------|----------|
| 6 | -3.78642 | 2.1172 | 0.214692 |
|---|----------|--------|----------|

|    |           |           |           |
|----|-----------|-----------|-----------|
| 6  | -3.92786  | 3.16616   | 1.13371   |
| 6  | -2.79905  | 3.86364   | 1.57378   |
| 6  | -1.52194  | 3.55176   | 1.09676   |
| 6  | -1.39421  | 2.51186   | 0.172009  |
| 6  | -2.51946  | 1.77348   | -0.24362  |
| 7  | -0.235183 | 2.11628   | -0.499631 |
| 6  | -0.515739 | 0.905129  | -1.28015  |
| 6  | -2.07948  | 0.700103  | -1.21001  |
| 6  | -0.327693 | -0.460118 | -0.626044 |
| 6  | -1.81176  | -0.792616 | -0.718059 |
| 8  | -2.02857  | -1.58975  | -1.93728  |
| 6  | -2.57666  | -0.878729 | -2.95578  |
| 6  | -2.83065  | 0.554054  | -2.52524  |
| 6  | 0.69027   | -1.16419  | -0.111339 |
| 6  | 2.11822   | -0.822879 | -0.052613 |
| 6  | 2.95852   | -1.60391  | 0.762809  |
| 6  | 4.32128   | -1.33967  | 0.873767  |
| 6  | 4.86301   | -0.279543 | 0.150601  |
| 6  | 4.06607   | 0.508386  | -0.679135 |
| 6  | 2.70458   | 0.233882  | -0.776636 |
| 35 | 6.73594   | 0.097576  | 0.289572  |
| 8  | -2.80947  | -1.38734  | -4.02755  |
| 1  | -0.095556 | 0.982405  | -2.29013  |
| 6  | -2.52464  | -1.53358  | 0.421737  |
| 6  | -4.03916  | -1.70494  | 0.177558  |
| 6  | -4.68593  | -2.57588  | 1.26647   |
| 6  | -4.41396  | -2.02625  | 2.67331   |
| 6  | -2.91023  | -1.8336   | 2.91356   |
| 6  | -2.26787  | -0.95403  | 1.8285    |
| 1  | -2.50406  | 1.24738   | -3.30475  |
| 1  | -3.91138  | 0.687985  | -2.39783  |
| 1  | -4.52121  | -0.718534 | 0.175685  |
| 1  | -4.21491  | -2.15259  | -0.80594  |
| 1  | -5.76542  | -2.65016  | 1.08784   |
| 1  | -4.28715  | -3.59757  | 1.19219   |
| 1  | -4.92451  | -1.05948  | 2.78929   |
| 1  | -4.83754  | -2.69637  | 3.43133   |
| 1  | -2.73675  | -1.38699  | 3.90006   |
| 1  | -2.41637  | -2.81615  | 2.92424   |
| 1  | -2.68424  | 0.057249  | 1.89317   |
| 1  | -1.19238  | -0.863318 | 2.0109    |
| 1  | -2.0822   | -2.54269  | 0.402516  |
| 1  | -4.66226  | 1.57171   | -0.12517  |

|   |           |          |          |
|---|-----------|----------|----------|
| 1 | -4.91281  | 3.43424  | 1.50314  |
| 1 | -2.9121   | 4.67176  | 2.29138  |
| 1 | -0.651908 | 4.11355  | 1.42403  |
| 1 | 0.440006  | -2.1216  | 0.345036 |
| 1 | 2.5344    | -2.43199 | 1.32379  |
| 1 | 4.94912   | -1.95168 | 1.51155  |
| 1 | 4.50086   | 1.32225  | -1.24855 |
| 1 | 2.10537   | 0.842089 | -1.44471 |
| 1 | 0.640519  | 2.15188  | 0.008205 |

### Conformer 12

B3LYP/6-31G\*\* Energy = -3744.074808 hartrees

|    |           |           |           |
|----|-----------|-----------|-----------|
| 6  | -4.17691  | 1.99308   | -0.064282 |
| 6  | -4.5877   | 2.99424   | 0.824725  |
| 6  | -3.63496  | 3.76669   | 1.49679   |
| 6  | -2.26594  | 3.55484   | 1.3071    |
| 6  | -1.86587  | 2.55068   | 0.422388  |
| 6  | -2.81703  | 1.76972   | -0.260772 |
| 7  | -0.547106 | 2.17359   | 0.115366  |
| 6  | -0.585133 | 1.13098   | -0.926634 |
| 6  | -2.11007  | 0.814626  | -1.18414  |
| 6  | -0.377404 | -0.322617 | -0.502408 |
| 6  | -1.83743  | -0.695796 | -0.758243 |
| 8  | -1.95123  | -1.45299  | -2.00771  |
| 6  | -2.32862  | -0.691954 | -3.06476  |
| 6  | -2.61074  | 0.730221  | -2.62103  |
| 6  | 0.673758  | -1.09766  | -0.196746 |
| 6  | 2.08426   | -0.711983 | -0.056094 |
| 6  | 2.50379   | 0.595828  | 0.250983  |
| 6  | 3.85647   | 0.91253   | 0.353732  |
| 6  | 4.80726   | -0.086864 | 0.152949  |
| 6  | 4.42787   | -1.39739  | -0.130554 |
| 6  | 3.07223   | -1.70031  | -0.225152 |
| 35 | 6.67005   | 0.345071  | 0.285685  |
| 8  | -2.4231   | -1.15589  | -4.17727  |
| 1  | 0.013344  | 1.427     | -1.79546  |
| 6  | -2.69579  | -1.40646  | 0.304656  |
| 6  | -2.44767  | -0.890806 | 1.73814   |
| 6  | -3.38987  | -1.56275  | 2.74921   |
| 6  | -3.2702   | -3.09152  | 2.70901   |
| 6  | -3.47698  | -3.6237   | 1.28463   |

|   |          |          |           |
|---|----------|----------|-----------|
| 6 | -2.53884 | -2.94457 | 0.274728  |
| 1 | -2.13113 | 1.43834  | -3.30225  |
| 1 | -3.692   | 0.897965 | -2.6886   |
| 1 | -1.40773 | -1.10357 | 2.01668   |
| 1 | -2.56876 | 0.193908 | 1.78796   |
| 1 | -3.17226 | -1.18988 | 3.75729   |
| 1 | -4.42641 | -1.2717  | 2.5266    |
| 1 | -2.27144 | -3.3846  | 3.06308   |
| 1 | -3.99206 | -3.5502  | 3.39582   |
| 1 | -3.3251  | -4.70961 | 1.2561    |
| 1 | -4.51875 | -3.44749 | 0.980443  |
| 1 | -2.73596 | -3.32358 | -0.731351 |
| 1 | -1.49952 | -3.20785 | 0.515443  |
| 1 | -3.74129 | -1.18102 | 0.041278  |
| 1 | -4.91679 | 1.40454  | -0.600833 |
| 1 | -5.64595 | 3.17418  | 0.987254  |
| 1 | -3.96042 | 4.54662  | 2.17968   |
| 1 | -1.53016 | 4.15612  | 1.8332    |
| 1 | 0.481276 | -2.16301 | -0.077543 |
| 1 | 1.76548  | 1.36301  | 0.45394   |
| 1 | 4.164    | 1.92312  | 0.598796  |
| 1 | 5.17462  | -2.17031 | -0.273399 |
| 1 | 2.77359  | -2.72125 | -0.446306 |
| 1 | 0.085025 | 2.94335  | -0.073861 |

### Conformer 13

B3LYP/6-31G\*\* Energy = -3744.074264 hartrees

|   |          |           |           |
|---|----------|-----------|-----------|
| 6 | 3.90458  | 2.14038   | -0.543297 |
| 6 | 4.05011  | 2.99608   | -1.6446   |
| 6 | 2.92271  | 3.59064   | -2.21832  |
| 6 | 1.64078  | 3.36997   | -1.70206  |
| 6 | 1.50816  | 2.52662   | -0.596348 |
| 6 | 2.63457  | 1.89251   | -0.036274 |
| 7 | 0.345585 | 2.24915   | 0.12701   |
| 6 | 0.625681 | 1.19834   | 1.11548   |
| 6 | 2.18822  | 1.00332   | 1.09585   |
| 6 | 0.457769 | -0.264313 | 0.707349  |
| 6 | 1.95116  | -0.552349 | 0.843349  |
| 8 | 2.20003  | -1.1468   | 2.16468   |
| 6 | 2.73687  | -0.276914 | 3.05794   |
| 6 | 2.94225  | 1.0803    | 2.41503   |

|    |           |           |           |
|----|-----------|-----------|-----------|
| 6  | -0.56313  | -1.04826  | 0.331186  |
| 6  | -1.99133  | -0.718328 | 0.225858  |
| 6  | -2.8354   | -1.62076  | -0.4483   |
| 6  | -4.19808  | -1.37583  | -0.597276 |
| 6  | -4.73633  | -0.210959 | -0.055174 |
| 6  | -3.93593  | 0.699218  | 0.634323  |
| 6  | -2.57442  | 0.441769  | 0.771926  |
| 35 | -6.6087   | 0.142918  | -0.251804 |
| 8  | 2.99571   | -0.613301 | 4.18976   |
| 1  | 0.190747  | 1.45065   | 2.08971   |
| 6  | 2.75219   | -1.35843  | -0.195629 |
| 6  | 2.67302   | -2.88628  | 0.036472  |
| 6  | 3.56749   | -3.65187  | -0.950282 |
| 6  | 3.23284   | -3.31414  | -2.40897  |
| 6  | 3.27543   | -1.79917  | -2.6475   |
| 6  | 2.37615   | -1.03944  | -1.65914  |
| 1  | 2.59392   | 1.87178   | 3.08383   |
| 1  | 4.01815   | 1.22803   | 2.26417   |
| 1  | 2.95876   | -3.12659  | 1.06349   |
| 1  | 1.63327   | -3.21909  | -0.087386 |
| 1  | 4.61882   | -3.39864  | -0.751687 |
| 1  | 3.47013   | -4.7303   | -0.775282 |
| 1  | 3.92433   | -3.82771  | -3.08821  |
| 1  | 2.22639   | -3.68846  | -2.64526  |
| 1  | 4.30991   | -1.44347  | -2.54127  |
| 1  | 2.97114   | -1.56555  | -3.67491  |
| 1  | 2.4421    | 0.033793  | -1.85209  |
| 1  | 1.33101   | -1.32606  | -1.8308   |
| 1  | 3.80339   | -1.06363  | -0.048714 |
| 1  | 4.77745   | 1.66605   | -0.10219  |
| 1  | 5.03652   | 3.19114   | -2.05382  |
| 1  | 3.04005   | 4.24696   | -3.07635  |
| 1  | 0.772238  | 3.85158   | -2.14175  |
| 1  | -0.318719 | -2.06929  | 0.043528  |
| 1  | -2.41436  | -2.53032  | -0.867429 |
| 1  | -4.82837  | -2.08307  | -1.12473  |
| 1  | -4.3678   | 1.5956    | 1.06534   |
| 1  | -1.97422  | 1.14757   | 1.3345    |
| 1  | -0.52737  | 2.19108   | -0.383739 |

## Computational Details

Biaryl carboxylic acids used for parameterization were submitted to a geometry optimization in Gaussian 09<sup>12</sup> using the Def2TZVP basis set and M06-2x functional. This basis set and functional has been shown to be accurate for a large number of main group systems<sup>19</sup>. Input geometry for the unsubstituted biaryl carboxylic acid used a 90° dihedral angle between the two aryl rings, and a 0° dihedral angle between the carboxylic acid and the aryl ring. The –OH moiety of the carboxylic acid was pointed away from the second aryl ring. The optimized geometry of the unsubstituted biaryl carboxylic acid was used as the starting point for all subsequent calculations, with the 2-substitution being deemed the carbon closer in space to the carboxylic acid. Geometry optimization was then carried out on these structures.

Urea molecules used for parameterization were submitted to a geometry optimization in Gaussian 09 using the Jun-CC-pVTZ basis set and M06-2x functional. This basis set was chosen as a compromise between computation efficiency and accuracy with possible hydrogen bonding interactions<sup>20</sup>. Input geometry for the unsubstituted pyridine-urea ( $R^2, R^3, R^4 = H$ ) used a fully planar molecule. Output from this geometry optimization was used to build the input geometries for all subsequent molecules. Input geometries generally utilized planar molecules, with the exception of the –NMe<sub>2</sub> group, which had one bond in plane with the pyridine, and one 30° out of plane to conserve the sp<sup>3</sup> hybridization.

Triple zeta potential basis sets were chosen along with the M06-2x functional, as these generally lead to quantitative correlations. Infrared frequency and NBO charge distribution calculations were carried out on the optimized geometry. Linear scaling factors were not used as this would not affect the correlations<sup>21</sup>. All optimized structures lacked any imaginary frequencies and were thus deemed ground states and not transition states. Sterimol values were calculated using Molecular Modeling Pro<sup>22</sup>. Multivariate models were constructed and analyzed using Matlab Statistical toolbox version 2014a<sup>23</sup>.



## Catalyst Structures Versus Computed Structures

All catalysts utilized the H<sub>8</sub>-(*S*)-BINAM backbone. The entire structure is listed below, as well as the computed structures that were used in modeling.

Table S1: Catalyst and computed structures

| # | Structure                                                                           | Aryl Group                                                                           | Urea                                                                                  |
|---|-------------------------------------------------------------------------------------|--------------------------------------------------------------------------------------|---------------------------------------------------------------------------------------|
| 1 | 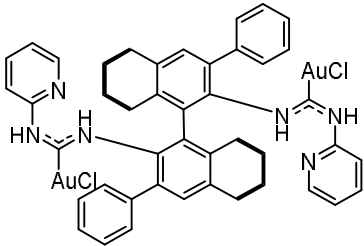   |    |    |
| 2 |   |    |    |
| 3 |  |  |  |
| 4 |  |  |  |

|   |                                                                                     |                                                                                      |                                                                                       |
|---|-------------------------------------------------------------------------------------|--------------------------------------------------------------------------------------|---------------------------------------------------------------------------------------|
| 5 | 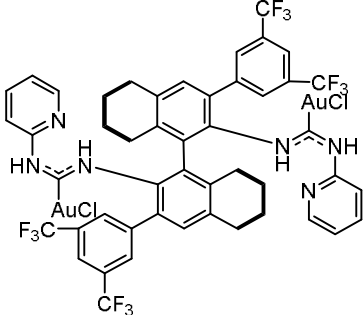   |    |    |
| 6 |    |    |    |
| 7 |   |    |    |
| 8 |  |  |  |
| 9 |  |  |  |

|    |                                                                                     |                                                                                      |                                                                                       |
|----|-------------------------------------------------------------------------------------|--------------------------------------------------------------------------------------|---------------------------------------------------------------------------------------|
| 10 | 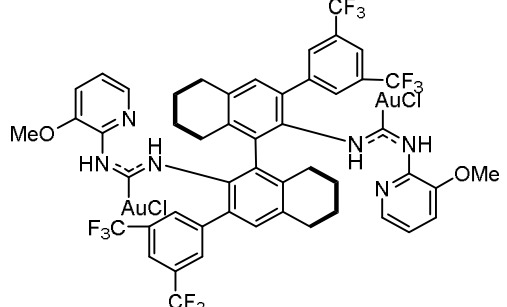   |    |    |
| 11 |    |    |    |
| 12 |   |   |   |
| 13 |  |  |  |
| 14 |  |  |  |

|    |  |  |  |
|----|--|--|--|
| 15 |  |  |  |
| 16 |  |  |  |
| 17 |  |  |  |
| 18 |  |  |  |
| 19 |  |  |  |

|    |  |  |  |
|----|--|--|--|
| 20 |  |  |  |
| 21 |  |  |  |
| 22 |  |  |  |
| 23 |  |  |  |
| 24 |  |  |  |

|    |  |  |  |
|----|--|--|--|
| 25 |  |  |  |
| 26 |  |  |  |
| 27 |  |  |  |
| 28 |  |  |  |
| 29 |  |  |  |

## Parameters List

The ADC catalysts have two distinctive  $^1\text{H}$  NMR shifts that correspond to the two NH shifts. Early modeling relied on these shifts and thus these are reported here. The first shift originates from the NH attached to the BINAM backbone. The second shift corresponds to the NH attached to the substituted aryl rings. These are highlighted in red for clarity.

Table S2: NMR Parameters

| #  | 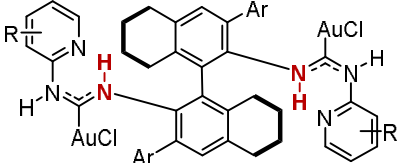<br>N-H Hydrogen Bonded | <br>N-H Aniline |
|----|----------------------------------------------------------------------------------------------------------|---------------------------------------------------------------------------------------------------|
| 1  | 13.44                                                                                                    | 8.36                                                                                              |
| 2  | 13.39                                                                                                    | 8.14                                                                                              |
| 3  | 13.44                                                                                                    | 8.27                                                                                              |
| 4  | 13.39                                                                                                    | 8.42                                                                                              |
| 5  | 13.57                                                                                                    | 8.78                                                                                              |
| 6  | 13.50                                                                                                    | 8.26                                                                                              |
| 7  | 13.49                                                                                                    | 8.32                                                                                              |
| 8  | 13.50                                                                                                    | 8.26                                                                                              |
| 9  | 13.55                                                                                                    | 8.54                                                                                              |
| 10 | 13.72                                                                                                    | 8.59                                                                                              |
| 11 | 13.81                                                                                                    | 8.61                                                                                              |
| 12 | 13.73                                                                                                    | 8.40                                                                                              |
| 13 | 13.90                                                                                                    | 8.45                                                                                              |
| 14 | 13.94                                                                                                    | 7.92                                                                                              |
| 15 | 14.16                                                                                                    | 7.94                                                                                              |
| 16 | 13.23                                                                                                    | 8.25                                                                                              |
| 17 | 13.22                                                                                                    | 8.76                                                                                              |
| 18 | 13.36                                                                                                    | 8.05                                                                                              |
| 19 | 13.23                                                                                                    | 8.25                                                                                              |
| 20 | 12.91                                                                                                    | 8.73                                                                                              |
| 21 | 12.74                                                                                                    | 10.04                                                                                             |
| 22 | 14.67                                                                                                    | 8.96                                                                                              |
| 23 | 13.97                                                                                                    | 8.46                                                                                              |
| 24 | 13.41                                                                                                    | 8.42                                                                                              |
| 25 | 13.26                                                                                                    | 8.22                                                                                              |
| 26 | 13.77                                                                                                    | 8.75                                                                                              |
| 27 | 13.86                                                                                                    | 8.50                                                                                              |
| 28 | 13.75                                                                                                    | 8.92                                                                                              |

|    |       |      |
|----|-------|------|
| 29 | 13.76 | 8.54 |
|----|-------|------|

Aryl groups were simulated with biaryl carboxylic acids. Table S3 includes the biaryl carboxylic acid along with the parameters derived from these groups. A number of groups were calculated but never synthesized. Regardless, parameters from these groups are reported here. Representatives of each parameter are visualized for clarity.

C=O stretch:

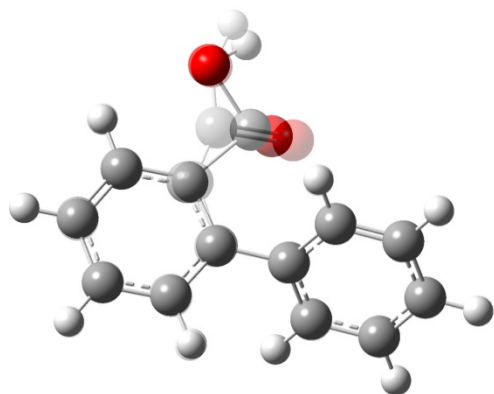

2,3/5,6 stretch:

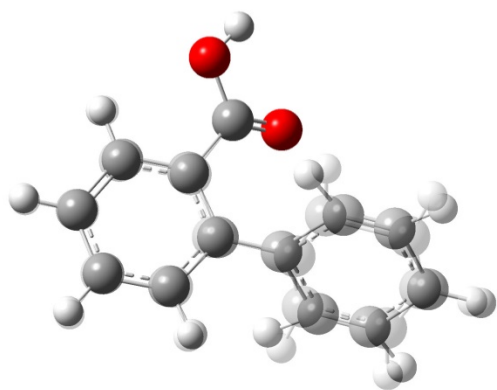

1,1' stretch:

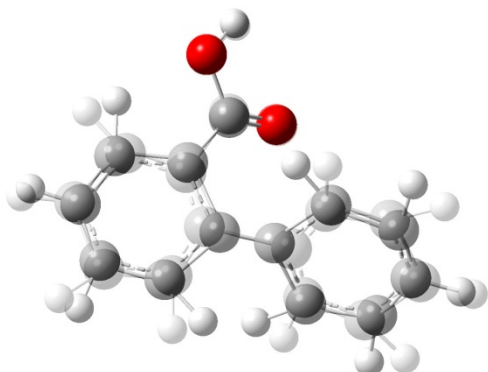



Table S3: Aryl group parameters

| Biaryl<br>Carboxylic acid                                                           | C=O<br>stretch | C=O<br>stretch<br>int | 2,3/5,6<br>stretch | 2,3/5,6<br>stretch<br>int | 1,1'<br>stretch | 1,1'<br>stretch<br>int |
|-------------------------------------------------------------------------------------|----------------|-----------------------|--------------------|---------------------------|-----------------|------------------------|
| 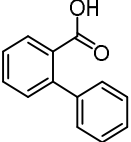   | 1858.34        | 341.1736              | 1688.33            | 1.0418                    | 1558.90         | 2.7241                 |
|    | 1857.77        | 342.1896              | 1685.94            | 11.3233                   | 1548.29         | 13.3398                |
|    | 1859.04        | 336.3355              | 1677.51            | 25.8803                   | 1545.59         | 31.9882                |
|   | 1863.37        | 340.6566              | 1694.34            | 142.4133                  | 1552.38         | 25.8095                |
|  | 1855.24        | 355.1680              | 1701.23            | 5.3772                    | 1678.04         | 6.5687                 |
|  | 1854.09        | 360.8599              | 1707.51            | 38.7875                   | 1572.63         | 4.2720                 |
|  | 1851.38        | 362.8027              | 1705.8             | 2.1496                    | 1544.48         | 13.6410                |
|  | 1849.34        | 361.5283              | 1690.77            | 13.9801                   | 1554.57         | 6.7959                 |

|                                                                                     |         |          |         |          |         |         |
|-------------------------------------------------------------------------------------|---------|----------|---------|----------|---------|---------|
| 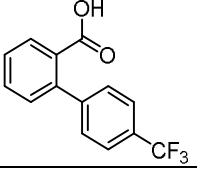   | 1857.43 | 350.8440 | 1702.61 | 25.1678  | 1578.33 | 6.2674  |
|    | 1856.01 | 354.4442 | 1684.52 | 15.6907  | 1560.74 | 2.1364  |
|    | 1857.54 | 343.5372 | 1696.09 | 26.9262  | 1576.25 | 59.5497 |
|    | 1852.15 | 351.9194 | 1733.11 | 23.9773  | 1552.97 | 79.4397 |
|   | 1843.36 | 362.7172 | 1675.62 | 220.6261 | 1556.1  | 15.0558 |
|  | 1858.33 | 341.3035 | 1640.87 | 1.3125   | 1551.52 | 9.8598  |

OCC sway:

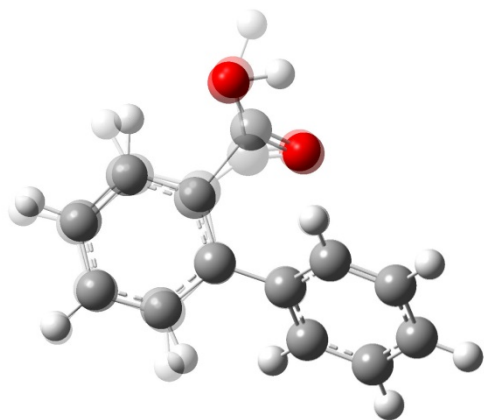

OCOH bend:

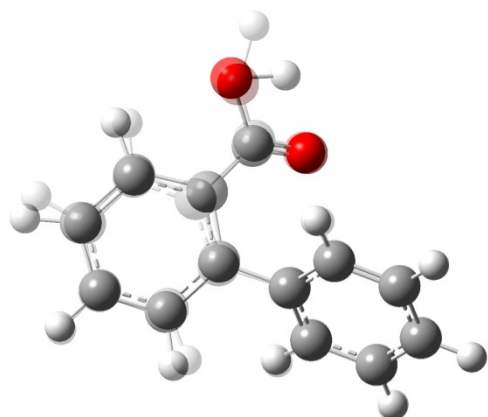

Biaryl Dihedral:

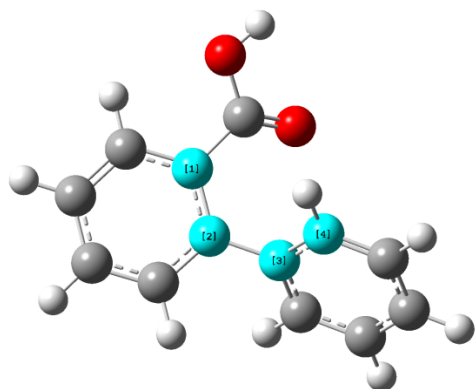

O--C Distance:

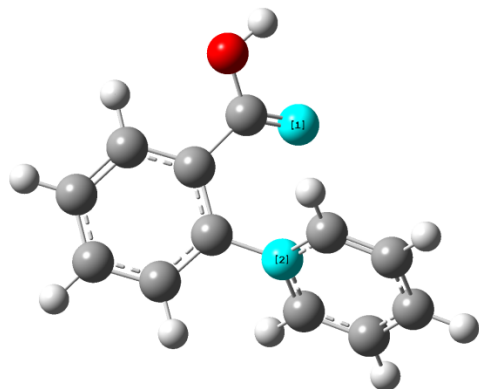

Table S3: Aryl group parameters continued

| Biaryl<br>Carboxylic acid                                                           | OCC<br>sway | OCC<br>sway int | OCOH<br>bend | OCOH<br>bend int | Biaryl<br>dihedral | O--C<br>distance |
|-------------------------------------------------------------------------------------|-------------|-----------------|--------------|------------------|--------------------|------------------|
| 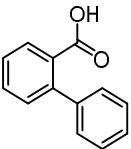   | 1388.10     | 115.2057        | 1222.86      | 219.1623         | 54.40708           | 2.91940          |
|    | 1385.48     | 115.2831        | 1218.27      | 193.8588         | 53.66714           | 2.93723          |
|    | 1385.80     | 110.4202        | 1219.03      | 195.6319         | 50.94804           | 2.94753          |
|   | 1386.55     | 113.5134        | 1224.03      | 168.2045         | 54.22598           | 2.94595          |
|  | 1392.83     | 134.5383        | 1220.02      | 192.8528         | 55.51729           | 2.85557          |
|  | 1398.04     | 145.8788        | 1222.42      | 189.9250         | 80.26448           | 2.76589          |
|  | 1395.47     | 128.0073        | 1221.36      | 207.9752         | 82.19531           | 2.75754          |
|  | 1396.24     | 142.4949        | 1220.61      | 181.7475         | 88.27557           | 2.72472          |

|                                                                                     |         |          |         |          |          |         |
|-------------------------------------------------------------------------------------|---------|----------|---------|----------|----------|---------|
| 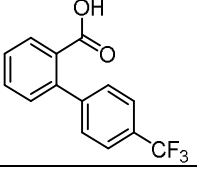   | 1390.76 | 123.3926 | 1220.82 | 199.8589 | 56.67441 | 2.87293 |
|    | 1390.70 | 132.8488 | 1217.93 | 195.9740 | 57.99285 | 2.85316 |
|    | 1386.99 | 122.6394 | 1218.23 | 172.4381 | 52.55287 | 2.91879 |
|    | 1395.63 | 141.2663 | 1221.84 | 208.4048 | 58.6311  | 2.80778 |
|   | 1403.31 | 163.0516 | 1223.19 | 217.6446 | 94.28291 | 2.68418 |
|  | 1388.40 | 122.9633 | 1215.86 | 187.6279 | 86.14638 | 2.76605 |

NBO<sub>C</sub>

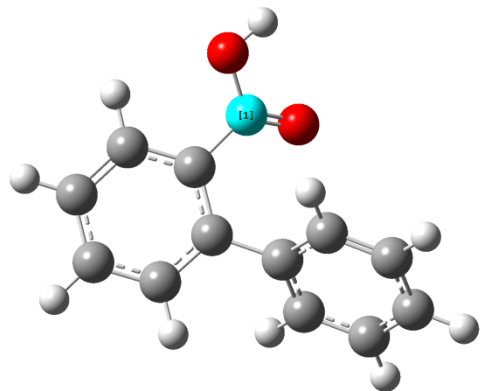

NBO<sub>O1</sub>

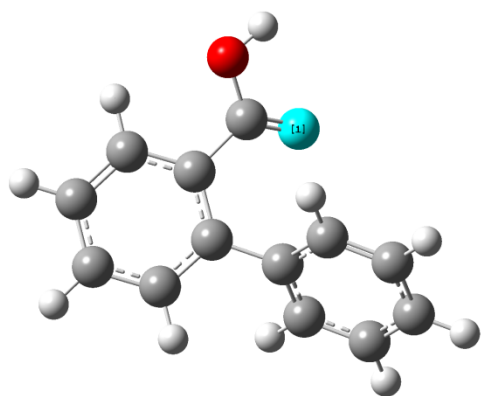

NBO<sub>O2</sub>

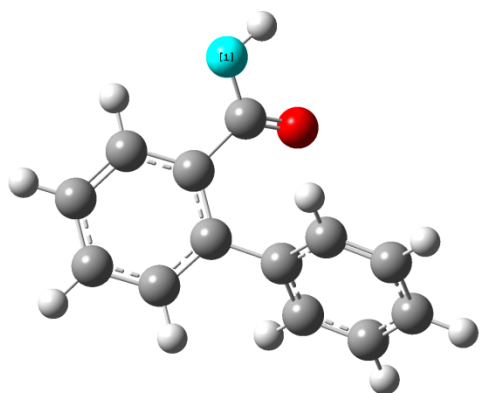

NBO<sub>H</sub>

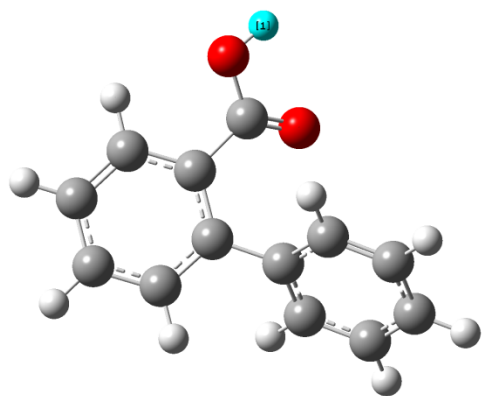

OCCC Dihedral

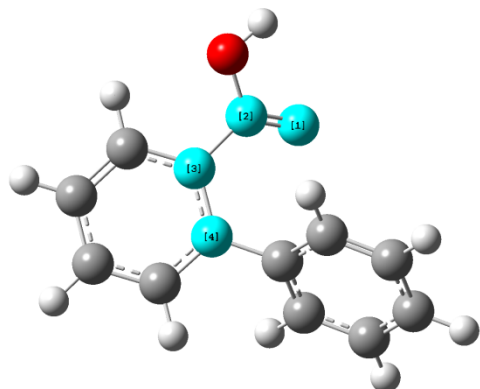

Table S3: Aryl Group Parameters Continued

| Biaryl Carboxylic acid                                                              | NBO <sub>C</sub> | NBO <sub>O1</sub> | NBO <sub>O2</sub> | NBO <sub>H</sub> | OCCC Dihedral |
|-------------------------------------------------------------------------------------|------------------|-------------------|-------------------|------------------|---------------|
| 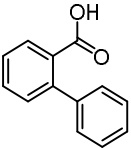   | 0.77962          | -0.57415          | -0.68885          | 0.49707          | 27.34645      |
|   | 0.78035          | -0.57490          | -0.68901          | 0.49600          | 29.08915      |
|  | 0.78037          | -0.57616          | -0.6884           | 0.49543          | 30.04504      |
|  | 0.78022          | -0.57290          | -0.68806          | 0.49575          | 31.20879      |
|  | 0.77732          | -0.57847          | -0.68341          | 0.50020          | 20.2494       |

|                                                                                     |         |          |          |          |          |
|-------------------------------------------------------------------------------------|---------|----------|----------|----------|----------|
| 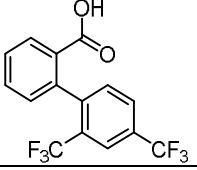   | 0.78729 | -0.58453 | -0.68256 | 0.50066  | 16.35259 |
|    | 0.78631 | -0.58425 | -0.68338 | 0.50080  | 13.75359 |
|    | 0.78793 | -0.58741 | -0.68394 | 0.50060  | 4.15664  |
|    | 0.77846 | -0.57535 | -0.68694 | 0.49919  | 22.54001 |
|   | 0.77830 | -0.57625 | -0.68549 | 0.50020  | 21.00061 |
|  | 0.77921 | -0.57557 | -0.68757 | 0.49812  | 26.94813 |
|  | 0.78436 | -0.58763 | -0.68080 | 0.50070  | 17.68428 |
|  | 0.79387 | -0.59380 | -0.67956 | 0.50104  | 0.01699  |
|  | 0.77914 | -0.57235 | -0.69072 | -0.49954 | 7.8812   |



Substitutions at the R groups on the pyridine moiety were simulated with ureas. Table S4 includes these ureas along with the parameters derived from these groups. A number of groups were calculated but never synthesized. Regardless, parameters from these groups are reported here. Representatives of each parameter are visualized for clarity.

C=O stretch:

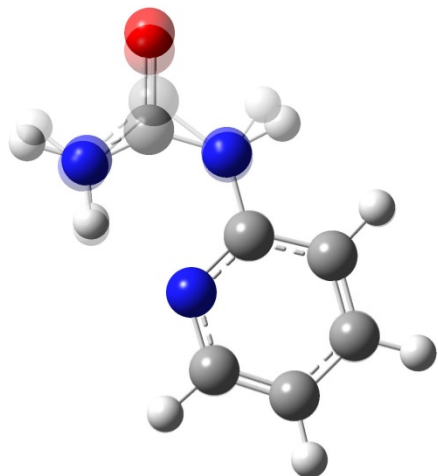

NH<sub>2</sub> scissor:

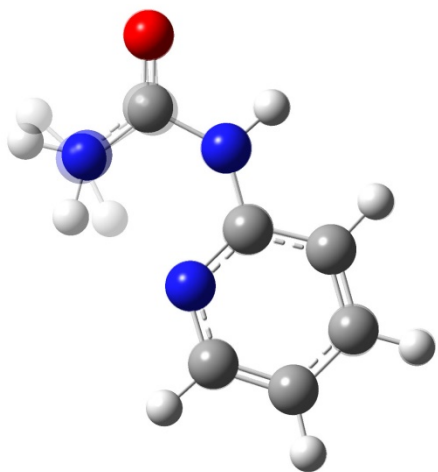

C–N stretch:

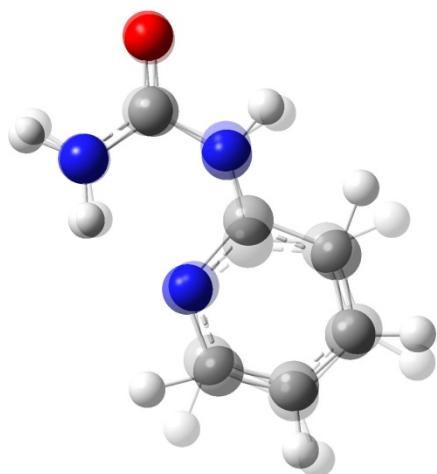

Table S4: Urea Parameters

| Urea                                                                                | C=O stretch | C=O stretch int | NH <sub>2</sub> scissor | NH <sub>2</sub> scissor int | C–N stretch | C–N stretch int |
|-------------------------------------------------------------------------------------|-------------|-----------------|-------------------------|-----------------------------|-------------|-----------------|
| 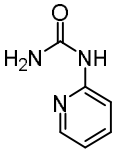   | 1812.26     | 719.85          | 1593.91                 | 420.2538                    | 1539.53     | 134.5852        |
|   | 1809.28     | 741.5668        | 1596.02                 | 452.3287                    | 1556.00     | 401.0913        |
|  | 1810.35     | 670.8827        | 1596.60                 | 463.4122                    | 1555.41     | 378.9649        |
|  | 1807.86     | 689.5108        | 1596.56                 | 467.3407                    | 1554.21     | 382.3888        |
|  | 1806.80     | 764.7300        | 1596.51                 | 346.2401                    | 1559.79     | 487.5909        |
|  | 1804.17     | 799.7262        | 1597.21                 | 371.2573                    | 1560.89     | 489.5687        |

|                                                                                     |         |          |         |          |         |          |
|-------------------------------------------------------------------------------------|---------|----------|---------|----------|---------|----------|
| 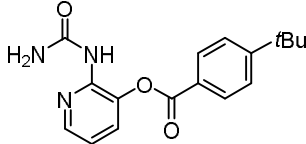   | 1815.44 | 674.1773 | 1597.21 | 439.2809 | 1551.15 | 345.7587 |
|    | 1805.51 | 780.7431 | 1598.50 | 404.5116 | 1563.21 | 581.6123 |
|    | 1809.93 | 708.1454 | 1590.92 | 481.5817 | 1532.96 | 206.3635 |
|    | 1807.63 | 686.7122 | 1595.65 | 473.4317 | 1554.28 | 384.1221 |
|    | 1809.95 | 724.4114 | 1596.06 | 488.0869 | 1551.71 | 383.9920 |
|  | 1807.18 | 718.5815 | 1595.37 | 475.1192 | 1552.70 | 392.0561 |
|  | 1802.79 | 657.8325 | 1594.75 | 471.7443 | 1553.51 | 386.1295 |
|  | 1809.05 | 695.9058 | 1591.84 | 438.1336 | 1537.68 | 255.3079 |
|  | 1811.88 | 715.9719 | 1592.88 | 360.1643 | 1553.68 | 613.3307 |
|  | 1818.21 | 703.7302 | 1598.82 | 394.2805 | 1545.92 | 464.3906 |

|                                                                                     |         |          |         |          |         |          |
|-------------------------------------------------------------------------------------|---------|----------|---------|----------|---------|----------|
| 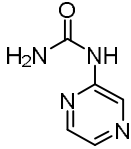   | 1820.30 | 720.7243 | 1600.44 | 370.5854 | 1538.73 | 207.3897 |
|    | 1817.63 | 697.1746 | 1591.14 | 391.2295 | 1523.99 | 158.5279 |
|    | 1807.76 | 704.6705 | 1596.09 | 471.1118 | 1553.30 | 375.3427 |
|    | 1804.24 | 699.0889 | 1595.23 | 448.9795 | 1544.48 | 340.9558 |
|    | 1804.90 | 705.1149 | 1600.51 | 415.9014 | 1539.67 | 324.9853 |
|   | 1815.72 | 792.8453 | 1592.58 | 347.0517 | 1511.82 | 183.0883 |
|  | 1810.69 | 774.2148 | 1595.10 | 595.9699 | 1529.45 | 204.9642 |

NBO<sub>C</sub>

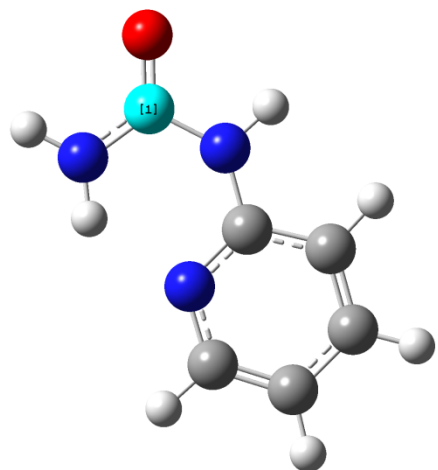

NBO<sub>O</sub>

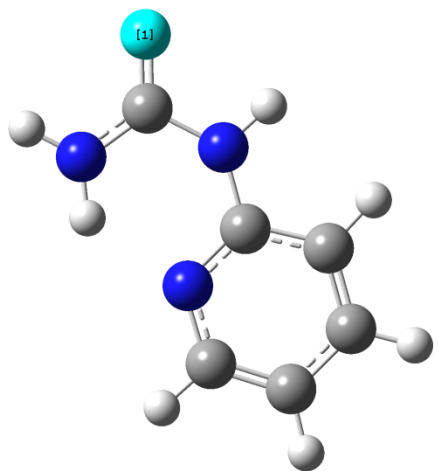

NBO<sub>N1</sub>

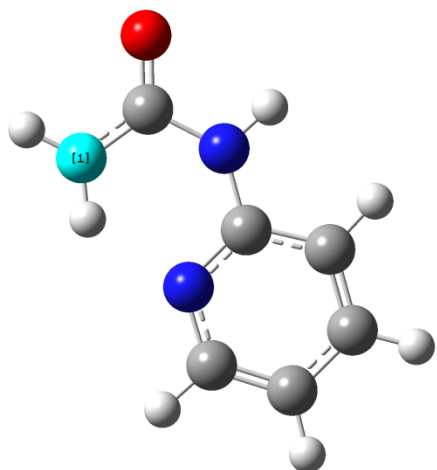

NBO<sub>N2</sub>

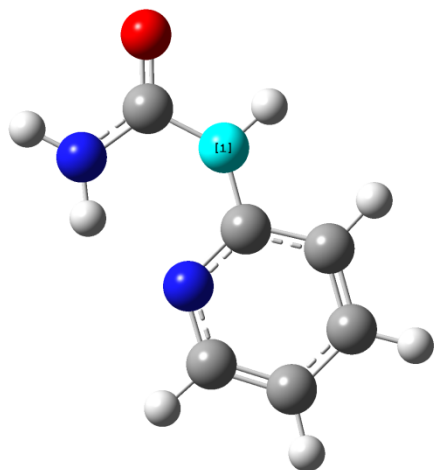

NBO<sub>Npyr</sub>

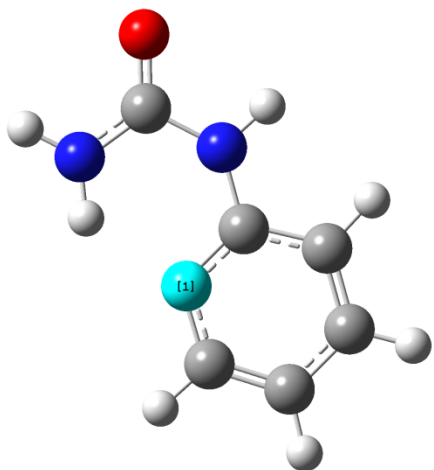

Table S4: Urea Parameters Continued

| Urea | NBO <sub>C</sub> | NBO <sub>O</sub> | NBO <sub>N1</sub> | NBO <sub>N2</sub> | NBO <sub>Npyr</sub> |
|------|------------------|------------------|-------------------|-------------------|---------------------|
|      | 0.80419          | -0.66130         | -0.84622          | -0.63986          | -0.52532            |
|      | 0.80474          | -0.65987         | -0.84750          | -0.64497          | -0.51350            |
|      | 0.80503          | -0.65970         | -0.84751          | -0.64573          | -0.51214            |

|                                                                                     |         |          |          |          |          |
|-------------------------------------------------------------------------------------|---------|----------|----------|----------|----------|
| 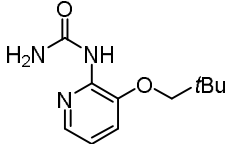   | 0.80450 | -0.66167 | -0.84743 | -0.64550 | 0.51400  |
|    | 0.80293 | -0.66560 | -0.84855 | -0.64282 | -0.50787 |
|    | 0.80280 | -0.66756 | -0.84910 | -0.64218 | -0.50936 |
|    | 0.80453 | -0.65350 | -0.85649 | -0.64740 | -0.51634 |
|   | 0.80395 | -0.66432 | -0.84986 | -0.64810 | -0.49508 |
|  | 0.80446 | -0.66320 | -0.84730 | -0.63916 | -0.54708 |
|  | 0.80483 | -0.66200 | -0.84776 | -0.64553 | -0.51317 |
|  | 0.80405 | -0.65940 | -0.84796 | -0.64418 | -0.51433 |
|  | 0.80402 | -0.66191 | -0.84803 | -0.64485 | -0.51539 |
|  | 0.80517 | -0.66255 | -0.84759 | -0.64551 | -0.51244 |

|                                                                                     |         |          |          |          |          |
|-------------------------------------------------------------------------------------|---------|----------|----------|----------|----------|
| 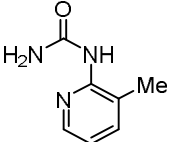   | 0.80597 | -0.66282 | -0.84551 | -0.64834 | -0.52275 |
|    | 0.80536 | -0.65673 | -0.84631 | -0.64884 | -0.49558 |
|    | 0.80379 | -0.65054 | -0.84546 | -0.63834 | -0.54423 |
|    | 0.80401 | -0.65253 | -0.84395 | -0.63838 | -0.49172 |
|    | 0.80624 | -0.66026 | -0.84272 | -0.63995 | -0.54222 |
|  | 0.80425 | -0.66133 | -0.84790 | -0.64539 | -0.51487 |
|  | 0.80581 | -0.66125 | -0.84778 | -0.65241 | -0.51960 |
|  | 0.80673 | -0.66008 | -0.84784 | -0.65754 | -0.50856 |
|  | 0.80402 | -0.65896 | -0.84509 | -0.63750 | -0.52893 |
|  | 0.80395 | -0.66389 | -0.84777 | -0.63908 | -0.50851 |



N--H Distance:

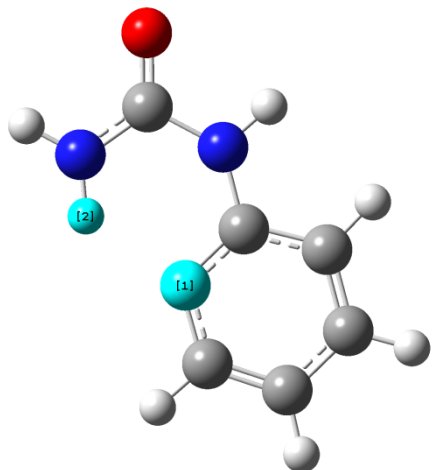

C-N distance:

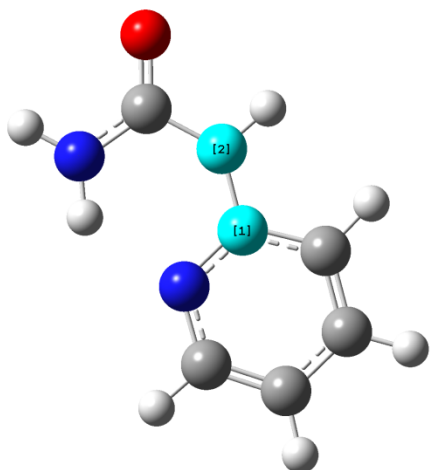

R<sub>2</sub>--H distance:

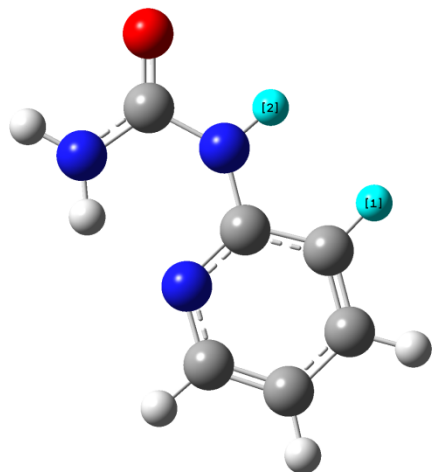

Table S4: Urea Parameters continued

| Urea                                                                                | N--H distance | C-N distance | R <sub>2</sub> --H distance |
|-------------------------------------------------------------------------------------|---------------|--------------|-----------------------------|
| 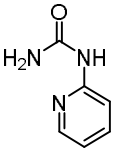   | 1.98775       | 1.38307      | 2.30744                     |
|    | 1.99172       | 1.3788       | 2.17126                     |
|    | 1.99116       | 1.37902      | 2.16650                     |
|    | 1.99233       | 1.37973      | 2.16393                     |
|   | 1.99361       | 1.38896      | 2.31721                     |
|  | 1.98966       | 1.38912      | 2.32234                     |
|  | 1.99477       | 1.37907      | 2.23116                     |
|  | 1.99704       | 1.38421      | 2.18394                     |
|  | 1.97941       | 1.38359      | 2.32458                     |

|                                                                                     |         |         |         |
|-------------------------------------------------------------------------------------|---------|---------|---------|
| 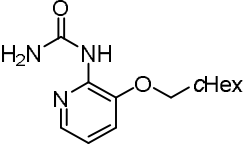   | 1.99129 | 1.37965 | 2.16457 |
|    | 1.99037 | 1.37929 | 2.18070 |
|    | 1.99007 | 1.3795  | 2.15761 |
|    | 1.99018 | 1.37997 | 2.15873 |
|    | 1.97755 | 1.38484 | 2.39457 |
|   | 1.99304 | 1.38070 | 2.56364 |
|  | 2.00592 | 1.38421 | *       |
|  | 2.00957 | 1.37762 | 2.32280 |
|  | 1.96433 | 1.37891 | 2.49283 |
|  | 1.99102 | 1.37936 | 2.16452 |

|                                                                                   |         |         |         |
|-----------------------------------------------------------------------------------|---------|---------|---------|
| 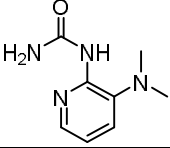 | 1.99380 | 1.38085 | 2.26409 |
|  | 1.99112 | 1.38811 | 2.32791 |
|  | 1.98365 | 1.38127 | 2.27462 |
|  | 1.99261 | 1.38606 | 2.32573 |

\*No R<sub>2</sub>--H distance due to no substituent

### Parameter Trends

A number of trends were identified that help to explain the origin of a number of parameters. These are highlighted below.

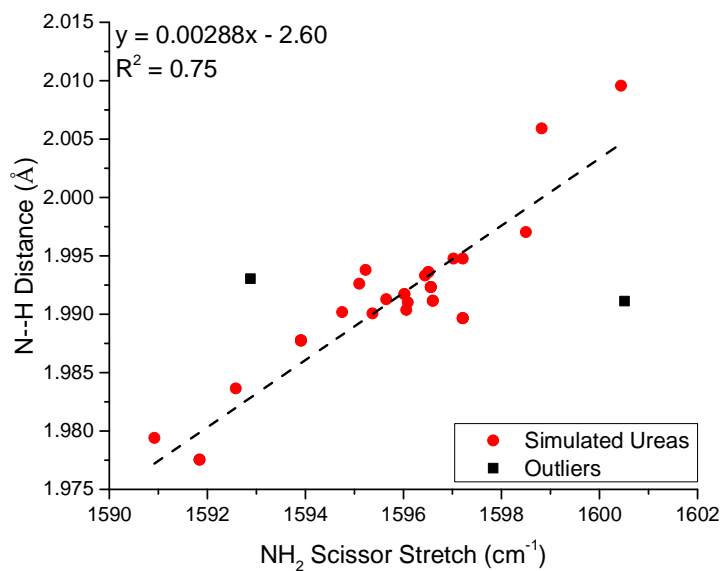

Further evidence of hydrogen bonding between the terminal hydrogen and the pyridine in the ureas

is shown between the relatively strong correlation between the distance of these two atoms and the IR scissoring frequency of the NH<sub>2</sub>. Models built using the scissoring frequency in place of the N-H distance showed slightly decreased correlation coefficients compared to an optimal model. Two structures were identified as outliers in this trend. The first structure, derived from L19, includes a bromine atom that is unique to any other complex. The second structure includes R<sup>1</sup> = NH<sub>2</sub>. The reason for this structure being an outlier is as yet unknown.

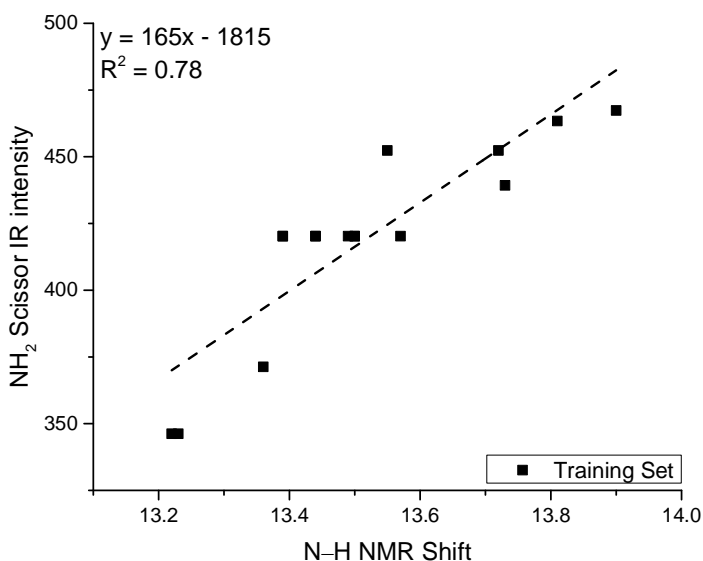

The intensity of the NH<sub>2</sub> scissor motion is correlated to the hydrogen bonded NMR shift. Small changes due to the variable aryl group are accounted for in the N-H hydrogen bonded NMR shift that cannot be accounted for in the NH<sub>2</sub> scissor IR intensity, as evidenced most clearly by the 8 complexes with varying aryl groups and a simulated intensity of 420.3. When comparing the entire set of complexes, three data points clearly become outliers from this trend. The first, from L28, contains a -OMe group on the pyridine ring that forms a resonance structure shown below, a likely cause of the lack of this correlation. The other two structures that are poorly correlated are the 1,3- and 1,4-pyrimidine structures (L20 and L21). The engagement of the second nitrogen in the aryl ring is a probable culprit for the origin of being off this trend line.

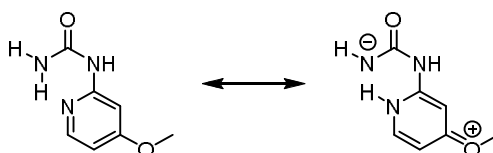

## References

1. E.C. Sherer, C.H. Lee, J. Shpungin, J.F. Cuff, C.X. Da, R. Ball, R. Bach, A. Crespo, X.Y. Gong, and C.J. Welch, *Journal of Medicinal Chemistry*, **2014**, *57*, 477.
2. Z.Q. Liu, C.S. Shultz, C.A. Sherwood, S. Krska, P.G. Dormer, R. Desmond, C. Lee, E.C. Sherer, J. Shpungin, J. Cuff, and F. Xu, *Tetrahedron Letters*, **2011**, *52*, 1685.
3. G.A. Petersson, and M.A. Allaham, *Journal of Chemical Physics*, **1991**, *94*, 6081.
4. G.A. Petersson, A. Bennett, T.G. Tensfeldt, M.A. Allaham, W.A. Shirley, and J. Mantzaris, *Journal of Chemical Physics*, **1988**, *89*, 2193.
5. V.A. Rassolov, J.A. Pople, M.A. Ratner, and T.L. Windus, *Journal of Chemical Physics*, **1998**, *109*, 1223.
6. V.A. Rassolov, M.A. Ratner, J.A. Pople, P.C. Redfern, and L.A. Curtiss, *Journal of Computational Chemistry*, **2001**, *22*, 976.
7. M.M. Francl, W.J. Pietro, W.J. Hehre, J.S. Binkley, M.S. Gordon, D.J. Defrees, and J.A. Pople, *Journal of Chemical Physics*, **1982**, *77*, 3654.
8. W.J. Hehre, R. Ditchfield, and J.A. Pople, *J. Chem. Phys.*, **1972**, *56*, 2257.
9. A.D. Becke, *J. Chem. Phys.*, **1993**, *98*, 5648.
10. C.T. Lee, W.T. Yang, and R.G. Parr, *Physical Review B*, **1988**, *37*, 785.
11. B. Miehlich, A. Savin, H. Stoll, and H. Preuss, *Chemical Physics Letters*, **1989**, *157*, 200.
12. M.J. Frisch, G.W. Trucks, H.B. Schlegel, G.E. Scuseria, M.A. Robb, J.R. Cheeseman, G. Scalmani, V. Barone, B. Mennucci, G.A. Petersson, H. Nakatsuji, M. Caricato, X. Li, H.P. Hratchian, A.F. Izmaylov, J. Bloino, G. Zheng, J.L. Sonnenberg, M. Hada, M. Ehara, K. Toyota, R. Fukuda, J. Hasegawa, M. Ishida, T. Nakajima, Y. Honda, O. Kitao, H. Nakai, T. Vreven, J. Montgomery, J.A., J.E. Peralta, F. Ogliaro, M. Bearpark, J.J. Heyd, E. Brothers, K.N. Kudin, V.N. Staroverov, R. Kobayashi, J. Normand, K. Raghavachari, A. Rendell, J.C. Burant, S.S. Iyengar, J. Tomasi, M. Cossi, N. Rega, J.M. Millam, M. Klene, J.E. Knox, J.B. Cross, V. Bakken, C. Adamo, J. Jaramillo, R. Gomperts, R.E. Stratmann, O. Yazyev, A.J. Austin, R. Cammi, C. Pomelli, J.W. Ochterski, R.L. Martin, K. Morokuma, V.G. Zakrzewski, G.A. Voth, P. Salvador, J.J. Dannenberg, S. Dapprich, A.D. Daniels, Ö. Farkas, J.B. Foresman, J.V. Ortiz, J. Cioslowski, and D.J. Fox. Gaussian 09, Revision A.02. Wallingford, CT: Gaussian, Inc.; 2009.
13. J.R. Cheeseman, M.J. Frisch, F.J. Devlin, and P.J. Stephens, *Chemical Physics Letters*, **1996**, *252*, 211.
14. J.A. Shen, C.Y. Zhu, S. Reiling, and R. Vaz, *Spectrochimica Acta Part a-Molecular and Biomolecular Spectroscopy*, **2010**, *76*, 418.
15. Zhang, L. *J. Am. Chem. Soc.* **2005**, *127*, 16804.
16. Kano, T.; Tanaka, Y.; Osawa, K.; Yurino, T.; Maruoka, K. *J. Org. Chem.* **2008**, *73*, 7387.
17. (a) Lacerda, R. B.; de Lima, C. K. F.; da Silva, L. L.; Romeiro, N. C.; Miranda, A. L. P.; Barreiro, E. J.; Fraga, C. A. M. *Bioorg. Med. Chem.* **2009**, *17*, 74. (b) Pirrung, M. C.; Ghorai, S. *J. Am. Chem. Soc.* **2006**, *128*, 11772. (c) Bartolomé, C.; Carrasco-Rando, M.; Coco, S.; Cordovilla, C.; Martín-Alvarez, J. M.; Espinet, P. *Inorg. Chem.* **2008**, *47*, 1616.
18. Khrakovsky, D. A.; Tao, C.; Johnson, M. W.; Thornbury, R. T.; Shevick, S. L.; Toste, F. D. *Angew. Chem. Int. Ed.* **2016**, *55*, 6079.
19. (a) Zhao, Y.; Truhlar, D., The M06 suite of density functionals for main group thermochemistry, thermochemical kinetics, noncovalent interactions, excited states, and

- transition elements: two new functionals and systematic testing of four M06-class functionals and 12 other functionals. *Theor. Chem. Acc.* **2008**,*120* (1-3), 215-241; (b) Weigend, F.; Ahlrichs, R., Balanced basis sets of split valence, triple zeta valence and quadruple zeta valence quality for H to Rn: Design and assessment of accuracy. *PCCP* **2005**,*7* (18), 3297-3305.
20. Papajak, E.; Zheng, J.; Xu, X.; Leverentz, H. R.; Truhlar, D. G., Perspectives on Basis Sets Beautiful: Seasonal Plantings of Diffuse Basis Functions. *J. Chem. Theory. Comput.* **2011**,*7* (10), 3027-3034.
  21. Merrick, J. P.; Moran, D.; Radom, L., An Evaluation of Harmonic Vibrational Frequency Scale Factors. *J. Phys. Chem. A* **2007**,*111* (45), 11683-11700.
  22. Quinn, J. A. *Molecular Modeling Pro*, 6.36; Norgwyn Montgomery Software Inc.: North Wales, PA
  23. *MATLAB and Statistics Toolbox Release 2014a*, The MathWorks, Inc.: Natick, Massachusetts, United States, 2014.

### X-ray analysis

**Complex L23\*(AuCl)<sub>2</sub> Crystallographic Data:** The obtained crystal was twinned, which was treated with CELL\_NOW and refined as a 2 component twin. Rotationally disordered CF<sub>3</sub> groups were restrained with ISOR and residual disordered solvent electron density was treated with SQUEEZE.

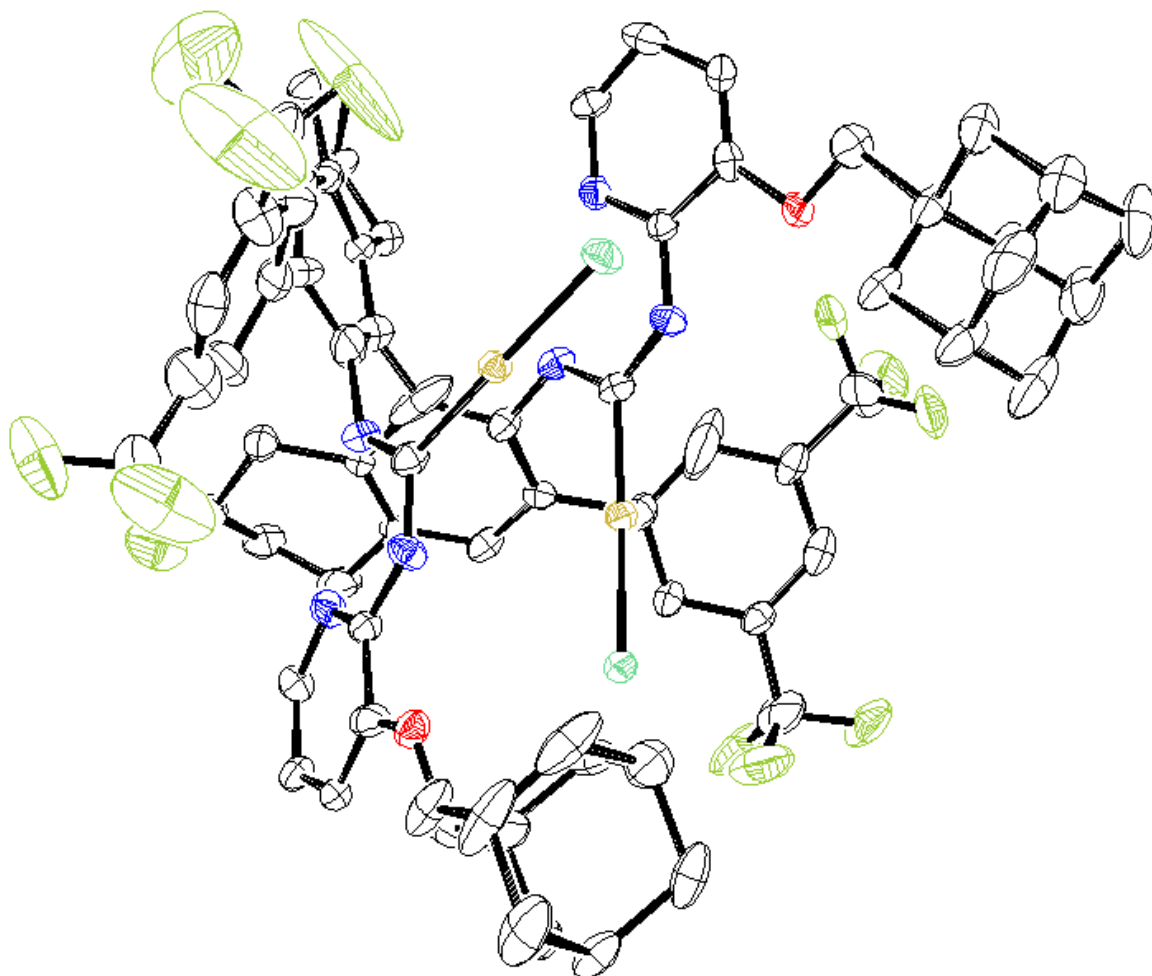

Table 1. Crystal data and structure refinement for cmh\_sp\_4.

|                                   |                                             |                  |
|-----------------------------------|---------------------------------------------|------------------|
| Identification code               | shelx                                       |                  |
| Empirical formula                 | C70 H68 Au2 Cl2 F12 N6 O2                   |                  |
| Formula weight                    | 1718.13                                     |                  |
| Temperature                       | 100(2) K                                    |                  |
| Wavelength                        | 0.71073 Å                                   |                  |
| Crystal system                    | Triclinic                                   |                  |
| Space group                       | P 1                                         |                  |
| Unit cell dimensions              | a = 11.2332(15) Å                           | a = 99.429(3)°.  |
|                                   | b = 13.4974(18) Å                           | b = 103.897(2)°. |
|                                   | c = 13.5685(18) Å                           | g = 101.439(2)°. |
| Volume                            | 1908.4(4) Å <sup>3</sup>                    |                  |
| Z                                 | 1                                           |                  |
| Density (calculated)              | 1.495 Mg/m <sup>3</sup>                     |                  |
| Absorption coefficient            | 3.983 mm <sup>-1</sup>                      |                  |
| F(000)                            | 846                                         |                  |
| Crystal size                      | 0.100 x 0.100 x 0.100 mm <sup>3</sup>       |                  |
| Theta range for data collection   | 1.579 to 25.375°.                           |                  |
| Index ranges                      | -13<=h<=13, -16<=k<=16, -16<=l<=16          |                  |
| Reflections collected             | 13583                                       |                  |
| Independent reflections           | 13583 [R(int) = ?]                          |                  |
| Completeness to theta = 25.000°   | 100.0 %                                     |                  |
| Absorption correction             | Semi-empirical from equivalents             |                  |
| Max. and min. transmission        | 0.745 and 0.504                             |                  |
| Refinement method                 | Full-matrix least-squares on F <sup>2</sup> |                  |
| Data / restraints / parameters    | 13583 / 95 / 824                            |                  |
| Goodness-of-fit on F <sup>2</sup> | 1.070                                       |                  |
| Final R indices [I>2sigma(I)]     | R1 = 0.0462, wR2 = 0.1116                   |                  |
| R indices (all data)              | R1 = 0.0477, wR2 = 0.1129                   |                  |
| Absolute structure parameter      | 0.023(5)                                    |                  |
| Extinction coefficient            | n/a                                         |                  |
| Largest diff. peak and hole       | 2.007 and -4.438 e.Å <sup>-3</sup>          |                  |



Table 2. Atomic coordinates ( $\times 10^4$ ) and equivalent isotropic displacement parameters ( $\text{\AA}^2 \times 10^3$ ) for cmh\_sp\_4.  $U(\text{eq})$  is defined as one third of the trace of the orthogonalized  $U_{ij}$  tensor.

|       | x         | y        | z         | $U(\text{eq})$ |
|-------|-----------|----------|-----------|----------------|
| C(1)  | 1054(16)  | 2554(18) | 1289(18)  | 27(5)          |
| C(2)  | -1198(17) | 2492(17) | 1165(18)  | 25(5)          |
| C(3)  | -2296(17) | 1880(20) | 2272(19)  | 27(4)          |
| C(4)  | -3377(17) | 2117(18) | 1752(19)  | 26(4)          |
| C(5)  | -3370(15) | 2590(16) | 899(19)   | 28(5)          |
| C(6)  | -2280(20) | 2770(20) | 520(30)   | 31(7)          |
| C(7)  | -3055(17) | 3800(20) | -560(20)  | 36(6)          |
| C(8)  | -2740(20) | 4330(20) | -1360(20) | 42(6)          |
| C(9)  | -3718(18) | 4940(20) | -1650(20) | 34(5)          |
| C(10) | -1420(17) | 5040(20) | -1058(19) | 34(5)          |
| C(11) | -2890(30) | 3520(20) | -2340(20) | 45(6)          |
| C(12) | -3540(20) | 5462(19) | -2506(18) | 33(5)          |
| C(13) | -3640(30) | 4660(30) | -3560(30) | 60(9)          |
| C(14) | -2660(40) | 4070(30) | -3270(30) | 60(10)         |
| C(15) | -2170(30) | 6190(20) | -2200(20) | 42(5)          |
| C(16) | -1430(30) | 4680(30) | -2970(20) | 55(8)          |
| C(17) | -1190(20) | 5560(20) | -1920(20) | 43(6)          |
| C(18) | 2130(20)  | 1600(20) | 2460(30)  | 71(11)         |
| C(19) | 2637(19)  | 890(20)  | 1730(30)  | 49(8)          |
| C(20) | 3716(18)  | 677(18)  | 2360(20)  | 31(5)          |
| C(21) | 4178(15)  | 919(15)  | 3434(16)  | 24(4)          |
| C(22) | 3574(13)  | 1444(15) | 4046(15)  | 21(4)          |
| C(23) | 2543(18)  | 1816(19) | 3477(19)  | 33(5)          |
| C(24) | 4014(16)  | 1678(18) | 5194(18)  | 29(4)          |
| C(25) | 4700(18)  | 893(17)  | 5601(16)  | 38(5)          |
| C(26) | 5787(15)  | 855(14)  | 5113(15)  | 34(4)          |
| C(27) | 5249(19)  | 460(20)  | 3900(20)  | 40(6)          |
| C(28) | 2298(12)  | 693(13)  | 722(10)   | 46(6)          |
| C(29) | 3152(9)   | 711(15)  | 130(12)   | 40(5)          |

|       |          |          |           |         |
|-------|----------|----------|-----------|---------|
| C(30) | 2711(13) | 452(15)  | -951(12)  | 44(5)   |
| C(31) | 1418(14) | 173(16)  | -1439(10) | 50(6)   |
| C(32) | 564(9)   | 155(15)  | -847(13)  | 70(8)   |
| C(33) | 1004(10) | 415(13)  | 233(13)   | 67(7)   |
| C(34) | 3710(30) | 550(20)  | -1570(30) | 47(7)   |
| C(35) | -770(30) | -180(20) | -1550(20) | 45(6)   |
| C(36) | 3332(15) | 4646(17) | 3326(16)  | 24(4)   |
| C(37) | 5558(16) | 4719(17) | 3367(18)  | 24(4)   |
| C(38) | 6735(18) | 3650(20) | 4032(18)  | 27(4)   |
| C(39) | 7768(18) | 4070(20) | 3780(20)  | 37(6)   |
| C(40) | 7663(18) | 4948(18) | 3260(20)  | 38(6)   |
| C(41) | 6630(20) | 5240(20) | 3060(20)  | 25(5)   |
| C(42) | 7283(19) | 6410(20) | 2090(20)  | 35(5)   |
| C(43) | 6920(20) | 7313(19) | 1596(19)  | 33(5)   |
| C(44) | 7010(30) | 8280(20) | 2380(30)  | 49(7)   |
| C(45) | 7890(20) | 7520(20) | 970(20)   | 38(5)   |
| C(46) | 5576(19) | 6927(19) | 837(19)   | 32(5)   |
| C(47) | 7570(30) | 8380(20) | 350(20)   | 47(6)   |
| C(48) | 7760(30) | 9340(30) | 1170(30)  | 61(9)   |
| C(49) | 6790(30) | 9080(30) | 1830(40)  | 65(11)  |
| C(50) | 5340(30) | 8700(20) | 960(30)   | 60(8)   |
| C(51) | 5320(30) | 7790(20) | 260(30)   | 48(7)   |
| C(52) | 6300(30) | 7970(30) | -380(30)  | 60(8)   |
| C(53) | 2312(16) | 3534(16) | 4263(17)  | 28(4)   |
| C(54) | 2070(30) | 2530(30) | 4050(20)  | 84(14)  |
| C(55) | 948(15)  | 1995(17) | 4463(19)  | 30(5)   |
| C(56) | 373(14)  | 2603(17) | 5087(17)  | 30(5)   |
| C(57) | 765(18)  | 3671(19) | 5246(19)  | 31(5)   |
| C(58) | 1710(13) | 4143(15) | 4871(16)  | 23(4)   |
| C(59) | -684(18) | 2070(20) | 5460(20)  | 42(6)   |
| C(60) | -636(17) | 1060(15) | 5603(14)  | 34(4)   |
| C(61) | -650(17) | 394(15)  | 4581(17)  | 34(4)   |
| C(62) | 542(17)  | 811(17)  | 4250(19)  | 32(5)   |
| C(63) | 1245(8)  | 5910(10) | 5185(12)  | 25(4)   |
| C(64) | 2173(11) | 5363(8)  | 5206(13)  | 30(4)   |
| C(65) | 3441(10) | 5893(10) | 5480(14)  | 105(12) |

|       |           |           |           |         |
|-------|-----------|-----------|-----------|---------|
| C(66) | 3781(8)   | 6970(10)  | 5733(13)  | 32(4)   |
| C(67) | 2853(11)  | 7518(8)   | 5712(12)  | 35(4)   |
| C(68) | 1585(10)  | 6988(10)  | 5438(12)  | 28(4)   |
| C(69) | 530(30)   | 7530(30)  | 5560(30)  | 57(8)   |
| C(70) | 5130(20)  | 7590(30)  | 6000(30)  | 59(10)  |
| N(1)  | 1088(13)  | 1967(15)  | 1949(14)  | 24(4)   |
| N(2)  | -79(13)   | 2752(16)  | 898(16)   | 26(4)   |
| N(3)  | -1185(13) | 2047(15)  | 1981(16)  | 28(4)   |
| N(4)  | 3345(13)  | 3945(15)  | 3948(14)  | 26(4)   |
| N(5)  | 4422(13)  | 5014(17)  | 3119(15)  | 24(4)   |
| N(6)  | 5643(14)  | 3919(15)  | 3824(15)  | 26(4)   |
| O(1)  | -2126(12) | 3217(13)  | -231(13)  | 27(3)   |
| O(2)  | 6382(12)  | 6064(13)  | 2666(15)  | 30(4)   |
| F(1)  | 3980(40)  | -470(30)  | -1790(30) | 157(14) |
| F(2)  | 4660(30)  | 1080(40)  | -1220(30) | 230(30) |
| F(3)  | 3280(30)  | 210(40)   | -2490(20) | 180(20) |
| F(4)  | -1070(20) | 230(40)   | -2450(30) | 125(14) |
| F(5)  | -1526(12) | 158(16)   | -913(15)  | 58(4)   |
| F(6)  | -1255(18) | -1190(20) | -1779(18) | 85(7)   |
| F(7)  | -293(17)  | 7341(18)  | 4560(19)  | 85(8)   |
| F(8)  | 980(17)   | 8554(14)  | 5737(16)  | 66(5)   |
| F(9)  | -160(20)  | 7206(15)  | 6043(19)  | 86(7)   |
| F(10) | 5628(15)  | 7896(16)  | 7035(15)  | 65(5)   |
| F(11) | 5269(14)  | 8353(16)  | 5620(30)  | 79(8)   |
| F(12) | 5847(11)  | 6993(12)  | 5674(15)  | 50(4)   |
| Cl(1) | 4382(4)   | 4040(4)   | 586(4)    | 30(1)   |
| Cl(2) | -102(3)   | 5315(4)   | 1771(4)   | 24(1)   |
| Au(1) | 2577(1)   | 3219(1)   | 904(1)    | 21(1)   |
| Au(2) | 1746(1)   | 4991(1)   | 2637(1)   | 21(1)   |

---

Table 3. Bond lengths [ $\text{\AA}$ ] and angles [ $^\circ$ ] for cmh\_sp\_4.

---

|              |           |
|--------------|-----------|
| C(1)-N(1)    | 1.29(3)   |
| C(1)-N(2)    | 1.35(2)   |
| C(1)-Au(1)   | 1.995(19) |
| C(2)-N(3)    | 1.34(3)   |
| C(2)-N(2)    | 1.39(2)   |
| C(2)-C(6)    | 1.47(3)   |
| C(3)-C(4)    | 1.38(3)   |
| C(3)-N(3)    | 1.38(3)   |
| C(3)-H(3)    | 0.9500    |
| C(4)-C(5)    | 1.41(3)   |
| C(4)-H(4)    | 0.9500    |
| C(5)-C(6)    | 1.43(3)   |
| C(5)-H(5)    | 0.9500    |
| C(6)-O(1)    | 1.30(3)   |
| C(7)-O(1)    | 1.46(3)   |
| C(7)-C(8)    | 1.47(4)   |
| C(7)-H(7A)   | 0.9900    |
| C(7)-H(7B)   | 0.9900    |
| C(8)-C(9)    | 1.51(3)   |
| C(8)-C(10)   | 1.52(3)   |
| C(8)-C(11)   | 1.53(4)   |
| C(9)-C(12)   | 1.49(4)   |
| C(9)-H(9A)   | 0.9900    |
| C(9)-H(9B)   | 0.9900    |
| C(10)-C(17)  | 1.51(4)   |
| C(10)-H(10A) | 0.9900    |
| C(10)-H(10B) | 0.9900    |
| C(11)-C(14)  | 1.61(5)   |
| C(11)-H(11A) | 0.9900    |
| C(11)-H(11B) | 0.9900    |
| C(12)-C(15)  | 1.57(4)   |
| C(12)-C(13)  | 1.61(4)   |
| C(12)-H(12)  | 1.0000    |
| C(13)-C(14)  | 1.50(4)   |

|              |         |
|--------------|---------|
| C(13)-H(13A) | 0.9900  |
| C(13)-H(13B) | 0.9900  |
| C(14)-C(16)  | 1.38(6) |
| C(14)-H(14)  | 1.0000  |
| C(15)-C(17)  | 1.53(4) |
| C(15)-H(15A) | 0.9900  |
| C(15)-H(15B) | 0.9900  |
| C(16)-C(17)  | 1.62(4) |
| C(16)-H(16A) | 0.9900  |
| C(16)-H(16B) | 0.9900  |
| C(17)-H(17)  | 1.0000  |
| C(18)-C(23)  | 1.31(5) |
| C(18)-N(1)   | 1.43(3) |
| C(18)-C(19)  | 1.56(5) |
| C(19)-C(28)  | 1.30(4) |
| C(19)-C(20)  | 1.41(3) |
| C(20)-C(21)  | 1.38(3) |
| C(20)-H(20)  | 0.9500  |
| C(21)-C(22)  | 1.39(3) |
| C(21)-C(27)  | 1.52(3) |
| C(22)-C(23)  | 1.46(2) |
| C(22)-C(24)  | 1.48(3) |
| C(23)-C(54)  | 1.40(2) |
| C(24)-C(25)  | 1.53(3) |
| C(24)-H(24A) | 0.9900  |
| C(24)-H(24B) | 0.9900  |
| C(25)-C(26)  | 1.53(2) |
| C(25)-H(25A) | 0.9900  |
| C(25)-H(25B) | 0.9900  |
| C(26)-C(27)  | 1.57(3) |
| C(26)-H(26A) | 0.9900  |
| C(26)-H(26B) | 0.9900  |
| C(27)-H(27A) | 0.9900  |
| C(27)-H(27B) | 0.9900  |
| C(28)-C(29)  | 1.3900  |
| C(28)-C(33)  | 1.3900  |

|              |           |
|--------------|-----------|
| C(29)-C(30)  | 1.3900    |
| C(29)-H(29)  | 0.9500    |
| C(30)-C(31)  | 1.3900    |
| C(30)-C(34)  | 1.55(3)   |
| C(31)-C(32)  | 1.3900    |
| C(31)-H(31)  | 0.9500    |
| C(32)-C(33)  | 1.3900    |
| C(32)-C(35)  | 1.51(3)   |
| C(33)-H(33)  | 0.9500    |
| C(34)-F(2)   | 1.11(4)   |
| C(34)-F(3)   | 1.20(5)   |
| C(34)-F(1)   | 1.47(4)   |
| C(35)-F(6)   | 1.31(4)   |
| C(35)-F(4)   | 1.42(4)   |
| C(35)-F(5)   | 1.43(3)   |
| C(36)-N(5)   | 1.34(3)   |
| C(36)-N(4)   | 1.37(3)   |
| C(36)-Au(2)  | 1.984(16) |
| C(37)-N(6)   | 1.34(3)   |
| C(37)-N(5)   | 1.39(2)   |
| C(37)-C(41)  | 1.46(3)   |
| C(38)-N(6)   | 1.33(3)   |
| C(38)-C(39)  | 1.34(3)   |
| C(38)-H(38)  | 0.9500    |
| C(39)-C(40)  | 1.48(4)   |
| C(39)-H(39)  | 0.9500    |
| C(40)-C(41)  | 1.28(3)   |
| C(40)-H(40)  | 0.9500    |
| C(41)-O(2)   | 1.36(3)   |
| C(42)-O(2)   | 1.47(3)   |
| C(42)-C(43)  | 1.56(3)   |
| C(42)-H(42A) | 0.9900    |
| C(42)-H(42B) | 0.9900    |
| C(43)-C(44)  | 1.51(4)   |
| C(43)-C(46)  | 1.55(3)   |
| C(43)-C(45)  | 1.55(3)   |

|              |         |
|--------------|---------|
| C(44)-C(49)  | 1.44(5) |
| C(44)-H(44A) | 0.9900  |
| C(44)-H(44B) | 0.9900  |
| C(45)-C(47)  | 1.58(4) |
| C(45)-H(45A) | 0.9900  |
| C(45)-H(45B) | 0.9900  |
| C(46)-C(51)  | 1.54(3) |
| C(46)-H(46A) | 0.9900  |
| C(46)-H(46B) | 0.9900  |
| C(47)-C(52)  | 1.47(5) |
| C(47)-C(48)  | 1.50(5) |
| C(47)-H(47)  | 1.0000  |
| C(48)-C(49)  | 1.60(5) |
| C(48)-H(48A) | 0.9900  |
| C(48)-H(48B) | 0.9900  |
| C(49)-C(50)  | 1.69(5) |
| C(49)-H(49)  | 1.0000  |
| C(50)-C(51)  | 1.42(5) |
| C(50)-H(50A) | 0.9900  |
| C(50)-H(50B) | 0.9900  |
| C(51)-C(52)  | 1.56(4) |
| C(51)-H(51)  | 1.0000  |
| C(52)-H(52A) | 0.9900  |
| C(52)-H(52B) | 0.9900  |
| C(53)-C(54)  | 1.30(4) |
| C(53)-N(4)   | 1.38(3) |
| C(53)-C(58)  | 1.44(3) |
| C(54)-C(55)  | 1.59(5) |
| C(55)-C(56)  | 1.43(3) |
| C(55)-C(62)  | 1.53(3) |
| C(56)-C(57)  | 1.39(3) |
| C(56)-C(59)  | 1.50(3) |
| C(57)-C(58)  | 1.37(3) |
| C(57)-H(57)  | 0.9500  |
| C(58)-C(64)  | 1.58(2) |
| C(59)-C(60)  | 1.41(3) |

|                |           |
|----------------|-----------|
| C(59)-H(59A)   | 0.9900    |
| C(59)-H(59B)   | 0.9900    |
| C(60)-C(61)    | 1.52(3)   |
| C(60)-H(60A)   | 0.9900    |
| C(60)-H(60B)   | 0.9900    |
| C(61)-C(62)    | 1.54(2)   |
| C(61)-H(61A)   | 0.9900    |
| C(61)-H(61B)   | 0.9900    |
| C(62)-H(62A)   | 0.9900    |
| C(62)-H(62B)   | 0.9900    |
| C(63)-C(64)    | 1.3900    |
| C(63)-C(68)    | 1.3900    |
| C(63)-H(63)    | 0.9500    |
| C(64)-C(65)    | 1.3900    |
| C(65)-C(66)    | 1.3900    |
| C(65)-H(65)    | 0.9500    |
| C(66)-C(67)    | 1.3900    |
| C(66)-C(70)    | 1.51(3)   |
| C(67)-C(68)    | 1.3900    |
| C(67)-H(67)    | 0.9500    |
| C(68)-C(69)    | 1.54(3)   |
| C(69)-F(9)     | 1.20(5)   |
| C(69)-F(8)     | 1.33(5)   |
| C(69)-F(7)     | 1.39(4)   |
| C(70)-F(11)    | 1.23(4)   |
| C(70)-F(10)    | 1.34(4)   |
| C(70)-F(12)    | 1.34(4)   |
| N(1)-H(1)      | 0.8800    |
| N(2)-H(2)      | 0.8800    |
| N(4)-H(4A)     | 0.8800    |
| N(5)-H(5A)     | 0.8800    |
| F(1)-F(3)      | 1.60(6)   |
| Cl(1)-Au(1)    | 2.283(4)  |
| Cl(2)-Au(2)    | 2.289(4)  |
| N(1)-C(1)-N(2) | 116.1(17) |



|                  |           |
|------------------|-----------|
| N(1)-C(1)-Au(1)  | 123.4(13) |
| N(2)-C(1)-Au(1)  | 120.4(16) |
| N(3)-C(2)-N(2)   | 118.1(16) |
| N(3)-C(2)-C(6)   | 127(2)    |
| N(2)-C(2)-C(6)   | 115(2)    |
| C(4)-C(3)-N(3)   | 123.2(19) |
| C(4)-C(3)-H(3)   | 118.4     |
| N(3)-C(3)-H(3)   | 118.4     |
| C(3)-C(4)-C(5)   | 119.8(17) |
| C(3)-C(4)-H(4)   | 120.1     |
| C(5)-C(4)-H(4)   | 120.1     |
| C(4)-C(5)-C(6)   | 121.1(17) |
| C(4)-C(5)-H(5)   | 119.5     |
| C(6)-C(5)-H(5)   | 119.5     |
| O(1)-C(6)-C(5)   | 128(2)    |
| O(1)-C(6)-C(2)   | 119(2)    |
| C(5)-C(6)-C(2)   | 113(2)    |
| O(1)-C(7)-C(8)   | 109.8(16) |
| O(1)-C(7)-H(7A)  | 109.7     |
| C(8)-C(7)-H(7A)  | 109.7     |
| O(1)-C(7)-H(7B)  | 109.7     |
| C(8)-C(7)-H(7B)  | 109.7     |
| H(7A)-C(7)-H(7B) | 108.2     |
| C(7)-C(8)-C(9)   | 108(2)    |
| C(7)-C(8)-C(10)  | 115.3(19) |
| C(9)-C(8)-C(10)  | 110(2)    |
| C(7)-C(8)-C(11)  | 109(2)    |
| C(9)-C(8)-C(11)  | 107(2)    |
| C(10)-C(8)-C(11) | 108(2)    |
| C(12)-C(9)-C(8)  | 112(2)    |
| C(12)-C(9)-H(9A) | 109.2     |
| C(8)-C(9)-H(9A)  | 109.2     |
| C(12)-C(9)-H(9B) | 109.2     |
| C(8)-C(9)-H(9B)  | 109.2     |
| H(9A)-C(9)-H(9B) | 107.9     |
| C(17)-C(10)-C(8) | 112(2)    |

|                     |           |
|---------------------|-----------|
| C(17)-C(10)-H(10A)  | 109.3     |
| C(8)-C(10)-H(10A)   | 109.3     |
| C(17)-C(10)-H(10B)  | 109.3     |
| C(8)-C(10)-H(10B)   | 109.3     |
| H(10A)-C(10)-H(10B) | 107.9     |
| C(8)-C(11)-C(14)    | 111(2)    |
| C(8)-C(11)-H(11A)   | 109.5     |
| C(14)-C(11)-H(11A)  | 109.5     |
| C(8)-C(11)-H(11B)   | 109.5     |
| C(14)-C(11)-H(11B)  | 109.5     |
| H(11A)-C(11)-H(11B) | 108.1     |
| C(9)-C(12)-C(15)    | 110.5(18) |
| C(9)-C(12)-C(13)    | 113(2)    |
| C(15)-C(12)-C(13)   | 104(2)    |
| C(9)-C(12)-H(12)    | 109.7     |
| C(15)-C(12)-H(12)   | 109.7     |
| C(13)-C(12)-H(12)   | 109.7     |
| C(14)-C(13)-C(12)   | 106(3)    |
| C(14)-C(13)-H(13A)  | 110.5     |
| C(12)-C(13)-H(13A)  | 110.5     |
| C(14)-C(13)-H(13B)  | 110.5     |
| C(12)-C(13)-H(13B)  | 110.5     |
| H(13A)-C(13)-H(13B) | 108.7     |
| C(16)-C(14)-C(13)   | 113(3)    |
| C(16)-C(14)-C(11)   | 109(3)    |
| C(13)-C(14)-C(11)   | 110(3)    |
| C(16)-C(14)-H(14)   | 108.3     |
| C(13)-C(14)-H(14)   | 108.3     |
| C(11)-C(14)-H(14)   | 108.3     |
| C(17)-C(15)-C(12)   | 110(2)    |
| C(17)-C(15)-H(15A)  | 109.7     |
| C(12)-C(15)-H(15A)  | 109.7     |
| C(17)-C(15)-H(15B)  | 109.7     |
| C(12)-C(15)-H(15B)  | 109.7     |
| H(15A)-C(15)-H(15B) | 108.2     |
| C(14)-C(16)-C(17)   | 111(2)    |

|                     |           |
|---------------------|-----------|
| C(14)-C(16)-H(16A)  | 109.4     |
| C(17)-C(16)-H(16A)  | 109.4     |
| C(14)-C(16)-H(16B)  | 109.4     |
| C(17)-C(16)-H(16B)  | 109.4     |
| H(16A)-C(16)-H(16B) | 108.0     |
| C(10)-C(17)-C(15)   | 109.6(19) |
| C(10)-C(17)-C(16)   | 109(2)    |
| C(15)-C(17)-C(16)   | 105(2)    |
| C(10)-C(17)-H(17)   | 110.8     |
| C(15)-C(17)-H(17)   | 110.8     |
| C(16)-C(17)-H(17)   | 110.8     |
| C(23)-C(18)-N(1)    | 121(3)    |
| C(23)-C(18)-C(19)   | 124(2)    |
| N(1)-C(18)-C(19)    | 115(3)    |
| C(28)-C(19)-C(20)   | 126(2)    |
| C(28)-C(19)-C(18)   | 126(2)    |
| C(20)-C(19)-C(18)   | 107(3)    |
| C(21)-C(20)-C(19)   | 129(2)    |
| C(21)-C(20)-H(20)   | 115.6     |
| C(19)-C(20)-H(20)   | 115.6     |
| C(20)-C(21)-C(22)   | 120.7(16) |
| C(20)-C(21)-C(27)   | 116.9(19) |
| C(22)-C(21)-C(27)   | 121.9(19) |
| C(21)-C(22)-C(23)   | 115.2(18) |
| C(21)-C(22)-C(24)   | 122.0(15) |
| C(23)-C(22)-C(24)   | 122.6(17) |
| C(18)-C(23)-C(54)   | 119(2)    |
| C(18)-C(23)-C(22)   | 123(2)    |
| C(54)-C(23)-C(22)   | 118(2)    |
| C(22)-C(24)-C(25)   | 112.2(18) |
| C(22)-C(24)-H(24A)  | 109.2     |
| C(25)-C(24)-H(24A)  | 109.2     |
| C(22)-C(24)-H(24B)  | 109.2     |
| C(25)-C(24)-H(24B)  | 109.2     |
| H(24A)-C(24)-H(24B) | 107.9     |
| C(24)-C(25)-C(26)   | 108.6(16) |

|                     |           |
|---------------------|-----------|
| C(24)-C(25)-H(25A)  | 110.0     |
| C(26)-C(25)-H(25A)  | 110.0     |
| C(24)-C(25)-H(25B)  | 110.0     |
| C(26)-C(25)-H(25B)  | 110.0     |
| H(25A)-C(25)-H(25B) | 108.3     |
| C(25)-C(26)-C(27)   | 109.8(14) |
| C(25)-C(26)-H(26A)  | 109.7     |
| C(27)-C(26)-H(26A)  | 109.7     |
| C(25)-C(26)-H(26B)  | 109.7     |
| C(27)-C(26)-H(26B)  | 109.7     |
| H(26A)-C(26)-H(26B) | 108.2     |
| C(21)-C(27)-C(26)   | 113.0(18) |
| C(21)-C(27)-H(27A)  | 109.0     |
| C(26)-C(27)-H(27A)  | 109.0     |
| C(21)-C(27)-H(27B)  | 109.0     |
| C(26)-C(27)-H(27B)  | 109.0     |
| H(27A)-C(27)-H(27B) | 107.8     |
| C(19)-C(28)-C(29)   | 123.5(12) |
| C(19)-C(28)-C(33)   | 116.5(12) |
| C(29)-C(28)-C(33)   | 120.0     |
| C(30)-C(29)-C(28)   | 120.0     |
| C(30)-C(29)-H(29)   | 120.0     |
| C(28)-C(29)-H(29)   | 120.0     |
| C(31)-C(30)-C(29)   | 120.0     |
| C(31)-C(30)-C(34)   | 122.1(16) |
| C(29)-C(30)-C(34)   | 117.7(16) |
| C(32)-C(31)-C(30)   | 120.0     |
| C(32)-C(31)-H(31)   | 120.0     |
| C(30)-C(31)-H(31)   | 120.0     |
| C(31)-C(32)-C(33)   | 120.0     |
| C(31)-C(32)-C(35)   | 110.1(15) |
| C(33)-C(32)-C(35)   | 129.8(15) |
| C(32)-C(33)-C(28)   | 120.0     |
| C(32)-C(33)-H(33)   | 120.0     |
| C(28)-C(33)-H(33)   | 120.0     |
| F(2)-C(34)-F(3)     | 123(4)    |

|                     |           |
|---------------------|-----------|
| F(2)-C(34)-F(1)     | 103(4)    |
| F(3)-C(34)-F(1)     | 73(3)     |
| F(2)-C(34)-C(30)    | 121(3)    |
| F(3)-C(34)-C(30)    | 115(2)    |
| F(1)-C(34)-C(30)    | 106(3)    |
| F(6)-C(35)-F(4)     | 110(3)    |
| F(6)-C(35)-F(5)     | 101(2)    |
| F(4)-C(35)-F(5)     | 106(3)    |
| F(6)-C(35)-C(32)    | 114(3)    |
| F(4)-C(35)-C(32)    | 119(2)    |
| F(5)-C(35)-C(32)    | 105(2)    |
| N(5)-C(36)-N(4)     | 116.6(16) |
| N(5)-C(36)-Au(2)    | 121.1(16) |
| N(4)-C(36)-Au(2)    | 122.0(13) |
| N(6)-C(37)-N(5)     | 120.4(17) |
| N(6)-C(37)-C(41)    | 119.8(18) |
| N(5)-C(37)-C(41)    | 120(2)    |
| N(6)-C(38)-C(39)    | 126(2)    |
| N(6)-C(38)-H(38)    | 117.1     |
| C(39)-C(38)-H(38)   | 117.1     |
| C(38)-C(39)-C(40)   | 115.2(19) |
| C(38)-C(39)-H(39)   | 122.4     |
| C(40)-C(39)-H(39)   | 122.4     |
| C(41)-C(40)-C(39)   | 121(2)    |
| C(41)-C(40)-H(40)   | 119.6     |
| C(39)-C(40)-H(40)   | 119.6     |
| C(40)-C(41)-O(2)    | 129(2)    |
| C(40)-C(41)-C(37)   | 120(2)    |
| O(2)-C(41)-C(37)    | 111(2)    |
| O(2)-C(42)-C(43)    | 109.6(17) |
| O(2)-C(42)-H(42A)   | 109.8     |
| C(43)-C(42)-H(42A)  | 109.8     |
| O(2)-C(42)-H(42B)   | 109.8     |
| C(43)-C(42)-H(42B)  | 109.8     |
| H(42A)-C(42)-H(42B) | 108.2     |
| C(44)-C(43)-C(46)   | 110(2)    |

|                     |           |
|---------------------|-----------|
| C(44)-C(43)-C(45)   | 111(2)    |
| C(46)-C(43)-C(45)   | 109(2)    |
| C(44)-C(43)-C(42)   | 114(2)    |
| C(46)-C(43)-C(42)   | 109.2(19) |
| C(45)-C(43)-C(42)   | 102.7(17) |
| C(49)-C(44)-C(43)   | 109(3)    |
| C(49)-C(44)-H(44A)  | 109.9     |
| C(43)-C(44)-H(44A)  | 109.9     |
| C(49)-C(44)-H(44B)  | 109.9     |
| C(43)-C(44)-H(44B)  | 109.9     |
| H(44A)-C(44)-H(44B) | 108.3     |
| C(43)-C(45)-C(47)   | 108.1(18) |
| C(43)-C(45)-H(45A)  | 110.1     |
| C(47)-C(45)-H(45A)  | 110.1     |
| C(43)-C(45)-H(45B)  | 110.1     |
| C(47)-C(45)-H(45B)  | 110.1     |
| H(45A)-C(45)-H(45B) | 108.4     |
| C(51)-C(46)-C(43)   | 108(2)    |
| C(51)-C(46)-H(46A)  | 110.1     |
| C(43)-C(46)-H(46A)  | 110.1     |
| C(51)-C(46)-H(46B)  | 110.1     |
| C(43)-C(46)-H(46B)  | 110.1     |
| H(46A)-C(46)-H(46B) | 108.4     |
| C(52)-C(47)-C(48)   | 117(3)    |
| C(52)-C(47)-C(45)   | 108(2)    |
| C(48)-C(47)-C(45)   | 106(3)    |
| C(52)-C(47)-H(47)   | 108.6     |
| C(48)-C(47)-H(47)   | 108.6     |
| C(45)-C(47)-H(47)   | 108.6     |
| C(47)-C(48)-C(49)   | 108(3)    |
| C(47)-C(48)-H(48A)  | 110.2     |
| C(49)-C(48)-H(48A)  | 110.2     |
| C(47)-C(48)-H(48B)  | 110.2     |
| C(49)-C(48)-H(48B)  | 110.2     |
| H(48A)-C(48)-H(48B) | 108.5     |
| C(44)-C(49)-C(48)   | 113(3)    |

|                     |           |
|---------------------|-----------|
| C(44)-C(49)-C(50)   | 110(3)    |
| C(48)-C(49)-C(50)   | 106(3)    |
| C(44)-C(49)-H(49)   | 109.5     |
| C(48)-C(49)-H(49)   | 109.5     |
| C(50)-C(49)-H(49)   | 109.5     |
| C(51)-C(50)-C(49)   | 107(2)    |
| C(51)-C(50)-H(50A)  | 110.2     |
| C(49)-C(50)-H(50A)  | 110.2     |
| C(51)-C(50)-H(50B)  | 110.2     |
| C(49)-C(50)-H(50B)  | 110.2     |
| H(50A)-C(50)-H(50B) | 108.5     |
| C(50)-C(51)-C(46)   | 111(3)    |
| C(50)-C(51)-C(52)   | 113(3)    |
| C(46)-C(51)-C(52)   | 108.1(19) |
| C(50)-C(51)-H(51)   | 108.2     |
| C(46)-C(51)-H(51)   | 108.2     |
| C(52)-C(51)-H(51)   | 108.2     |
| C(47)-C(52)-C(51)   | 109(3)    |
| C(47)-C(52)-H(52A)  | 109.9     |
| C(51)-C(52)-H(52A)  | 109.9     |
| C(47)-C(52)-H(52B)  | 109.9     |
| C(51)-C(52)-H(52B)  | 109.9     |
| H(52A)-C(52)-H(52B) | 108.3     |
| C(54)-C(53)-N(4)    | 110(2)    |
| C(54)-C(53)-C(58)   | 125(3)    |
| N(4)-C(53)-C(58)    | 124.1(18) |
| C(53)-C(54)-C(23)   | 133(4)    |
| C(53)-C(54)-C(55)   | 113(2)    |
| C(23)-C(54)-C(55)   | 114(3)    |
| C(56)-C(55)-C(62)   | 119.5(18) |
| C(56)-C(55)-C(54)   | 121(2)    |
| C(62)-C(55)-C(54)   | 119.1(18) |
| C(57)-C(56)-C(55)   | 117.3(19) |
| C(57)-C(56)-C(59)   | 123.2(18) |
| C(55)-C(56)-C(59)   | 119(2)    |
| C(58)-C(57)-C(56)   | 122.1(19) |

|                     |           |
|---------------------|-----------|
| C(58)-C(57)-H(57)   | 118.9     |
| C(56)-C(57)-H(57)   | 118.9     |
| C(57)-C(58)-C(53)   | 120.7(19) |
| C(57)-C(58)-C(64)   | 117.3(17) |
| C(53)-C(58)-C(64)   | 121.8(15) |
| C(60)-C(59)-C(56)   | 114.8(17) |
| C(60)-C(59)-H(59A)  | 108.6     |
| C(56)-C(59)-H(59A)  | 108.6     |
| C(60)-C(59)-H(59B)  | 108.6     |
| C(56)-C(59)-H(59B)  | 108.6     |
| H(59A)-C(59)-H(59B) | 107.5     |
| C(59)-C(60)-C(61)   | 108.9(17) |
| C(59)-C(60)-H(60A)  | 109.9     |
| C(61)-C(60)-H(60A)  | 109.9     |
| C(59)-C(60)-H(60B)  | 109.9     |
| C(61)-C(60)-H(60B)  | 109.9     |
| H(60A)-C(60)-H(60B) | 108.3     |
| C(60)-C(61)-C(62)   | 111.0(16) |
| C(60)-C(61)-H(61A)  | 109.4     |
| C(62)-C(61)-H(61A)  | 109.4     |
| C(60)-C(61)-H(61B)  | 109.4     |
| C(62)-C(61)-H(61B)  | 109.4     |
| H(61A)-C(61)-H(61B) | 108.0     |
| C(55)-C(62)-C(61)   | 113.8(16) |
| C(55)-C(62)-H(62A)  | 108.8     |
| C(61)-C(62)-H(62A)  | 108.8     |
| C(55)-C(62)-H(62B)  | 108.8     |
| C(61)-C(62)-H(62B)  | 108.8     |
| H(62A)-C(62)-H(62B) | 107.7     |
| C(64)-C(63)-C(68)   | 120.0     |
| C(64)-C(63)-H(63)   | 120.0     |
| C(68)-C(63)-H(63)   | 120.0     |
| C(63)-C(64)-C(65)   | 120.0     |
| C(63)-C(64)-C(58)   | 117.0(9)  |
| C(65)-C(64)-C(58)   | 123.0(9)  |
| C(66)-C(65)-C(64)   | 120.0     |



|                   |           |
|-------------------|-----------|
| C(66)-C(65)-H(65) | 120.0     |
| C(64)-C(65)-H(65) | 120.0     |
| C(65)-C(66)-C(67) | 120.0     |
| C(65)-C(66)-C(70) | 122.4(16) |
| C(67)-C(66)-C(70) | 117.6(16) |
| C(68)-C(67)-C(66) | 120.0     |
| C(68)-C(67)-H(67) | 120.0     |
| C(66)-C(67)-H(67) | 120.0     |
| C(67)-C(68)-C(63) | 120.0     |
| C(67)-C(68)-C(69) | 122.8(17) |
| C(63)-C(68)-C(69) | 116.5(17) |
| F(9)-C(69)-F(8)   | 118(3)    |
| F(9)-C(69)-F(7)   | 103(3)    |
| F(8)-C(69)-F(7)   | 101(3)    |
| F(9)-C(69)-C(68)  | 118(3)    |
| F(8)-C(69)-C(68)  | 109(3)    |
| F(7)-C(69)-C(68)  | 106(2)    |
| F(11)-C(70)-F(10) | 109(3)    |
| F(11)-C(70)-F(12) | 107(3)    |
| F(10)-C(70)-F(12) | 106(2)    |
| F(11)-C(70)-C(66) | 113.7(19) |
| F(10)-C(70)-C(66) | 111(3)    |
| F(12)-C(70)-C(66) | 110(3)    |
| C(1)-N(1)-C(18)   | 129(2)    |
| C(1)-N(1)-H(1)    | 115.7     |
| C(18)-N(1)-H(1)   | 115.7     |
| C(1)-N(2)-C(2)    | 130(2)    |
| C(1)-N(2)-H(2)    | 115.2     |
| C(2)-N(2)-H(2)    | 115.2     |
| C(2)-N(3)-C(3)    | 116.1(16) |
| C(36)-N(4)-C(53)  | 123.1(14) |
| C(36)-N(4)-H(4A)  | 118.5     |
| C(53)-N(4)-H(4A)  | 118.5     |
| C(36)-N(5)-C(37)  | 129(2)    |
| C(36)-N(5)-H(5A)  | 115.3     |
| C(37)-N(5)-H(5A)  | 115.3     |

|                   |           |
|-------------------|-----------|
| C(38)-N(6)-C(37)  | 118.7(17) |
| C(6)-O(1)-C(7)    | 114.5(18) |
| C(41)-O(2)-C(42)  | 110.9(18) |
| C(34)-F(1)-F(3)   | 46(2)     |
| C(34)-F(3)-F(1)   | 61(3)     |
| C(1)-Au(1)-Cl(1)  | 175.9(7)  |
| C(36)-Au(2)-Cl(2) | 177.0(6)  |

---

Symmetry transformations used to generate equivalent atoms:

Table 4. Anisotropic displacement parameters ( $\text{\AA}^2 \times 10^3$ ) for cmh\_sp\_4. The anisotropic displacement factor exponent takes the form:  $-2p^2 [ h^2 a^{*2} U^{11} + \dots + 2 h k a^* b^* U^{12} ]$

---

|       | U11     | U22    | U33     | U23     | U13     | U12    |
|-------|---------|--------|---------|---------|---------|--------|
| C(1)  | 32(8)   | 27(12) | 28(12)  | 12(9)   | 13(7)   | 12(7)  |
| C(2)  | 25(8)   | 22(11) | 28(12)  | 6(9)    | 5(7)    | 8(7)   |
| C(3)  | 27(7)   | 31(14) | 24(13)  | 7(8)    | 10(7)   | 4(7)   |
| C(4)  | 32(8)   | 23(11) | 30(12)  | 10(9)   | 16(8)   | 11(7)  |
| C(5)  | 21(7)   | 21(11) | 39(13)  | 1(9)    | 4(7)    | 6(7)   |
| C(6)  | 27(10)  | 32(15) | 33(14)  | -3(11)  | 5(9)    | 13(9)  |
| C(7)  | 20(8)   | 52(17) | 29(13)  | -6(11)  | 7(7)    | 4(9)   |
| C(8)  | 43(10)  | 50(16) | 28(13)  | -7(11)  | 5(8)    | 24(10) |
| C(9)  | 40(9)   | 31(13) | 29(13)  | -1(10)  | 6(8)    | 15(8)  |
| C(10) | 34(9)   | 43(15) | 27(12)  | 2(11)   | 7(8)    | 20(9)  |
| C(11) | 74(14)  | 28(13) | 34(14)  | 4(11)   | 9(11)   | 26(11) |
| C(12) | 53(10)  | 31(12) | 20(11)  | 6(9)    | 9(8)    | 24(9)  |
| C(13) | 95(19)  | 36(16) | 33(16)  | -10(12) | -6(13)  | 23(14) |
| C(14) | 130(30) | 35(14) | 24(13)  | 8(11)   | 11(14)  | 44(15) |
| C(15) | 83(15)  | 21(12) | 21(12)  | 6(9)    | 14(10)  | 13(11) |
| C(16) | 110(20) | 54(16) | 41(15)  | 27(13)  | 45(15)  | 58(17) |
| C(17) | 45(10)  | 43(16) | 49(16)  | 16(13)  | 22(10)  | 14(10) |
| C(18) | 36(10)  | 28(14) | 130(30) | 32(17)  | -10(14) | 6(9)   |
| C(19) | 33(9)   | 50(16) | 90(20)  | 52(16)  | 37(12)  | 25(10) |
| C(20) | 42(9)   | 23(11) | 41(13)  | 12(9)   | 27(9)   | 12(8)  |
| C(21) | 27(7)   | 21(9)  | 26(10)  | 6(7)    | 11(6)   | 5(6)   |

|       |         |        |         |         |         |        |
|-------|---------|--------|---------|---------|---------|--------|
| C(22) | 22(6)   | 21(9)  | 20(9)   | 5(7)    | 6(6)    | 6(6)   |
| C(23) | 36(8)   | 39(12) | 32(12)  | 20(10)  | 15(8)   | 16(8)  |
| C(24) | 31(8)   | 31(11) | 33(11)  | 16(9)   | 14(7)   | 11(7)  |
| C(25) | 46(10)  | 47(13) | 36(10)  | 23(9)   | 17(8)   | 29(9)  |
| C(26) | 30(8)   | 32(9)  | 45(10)  | 22(8)   | 12(7)   | 11(7)  |
| C(27) | 46(10)  | 37(13) | 62(16)  | 30(12)  | 36(10)  | 25(9)  |
| C(28) | 41(10)  | 27(12) | 63(15)  | -11(10) | 19(10)  | 4(8)   |
| C(29) | 46(10)  | 52(15) | 27(10)  | 3(10)   | 17(8)   | 18(9)  |
| C(30) | 50(11)  | 51(16) | 30(12)  | 17(10)  | 16(9)   | -1(10) |
| C(31) | 73(14)  | 30(13) | 46(13)  | 14(10)  | 15(11)  | 7(11)  |
| C(32) | 58(12)  | 63(16) | 87(15)  | 48(14)  | 1(12)   | 9(11)  |
| C(33) | 26(8)   | 38(11) | 131(16) | 49(12)  | -6(10)  | 2(8)   |
| C(34) | 57(13)  | 28(13) | 49(17)  | -7(11)  | 15(12)  | 7(9)   |
| C(35) | 61(13)  | 45(16) | 21(10)  | 8(10)   | 4(9)    | 3(11)  |
| C(36) | 26(7)   | 27(11) | 20(11)  | 4(9)    | 5(7)    | 12(7)  |
| C(37) | 26(8)   | 20(11) | 27(12)  | 6(9)    | 12(7)   | 6(7)   |
| C(38) | 32(8)   | 32(14) | 20(13)  | 5(8)    | 7(7)    | 17(8)  |
| C(39) | 22(8)   | 51(16) | 38(14)  | 4(12)   | 11(8)   | 10(9)  |
| C(40) | 33(9)   | 20(11) | 64(18)  | 6(11)   | 22(10)  | 4(8)   |
| C(41) | 30(10)  | 22(11) | 20(12)  | 4(9)    | 6(8)    | 0(8)   |
| C(42) | 42(10)  | 38(14) | 33(14)  | 17(12)  | 19(9)   | 12(9)  |
| C(43) | 56(11)  | 27(12) | 32(12)  | 13(10)  | 26(9)   | 20(9)  |
| C(44) | 80(15)  | 23(13) | 60(19)  | 10(12)  | 46(14)  | 17(11) |
| C(45) | 59(11)  | 28(13) | 41(15)  | 10(11)  | 34(10)  | 12(9)  |
| C(46) | 50(10)  | 29(12) | 28(12)  | 12(10)  | 17(8)   | 22(9)  |
| C(47) | 73(14)  | 36(14) | 45(16)  | 7(12)   | 41(13)  | 16(11) |
| C(48) | 100(20) | 30(16) | 60(20)  | 16(15)  | 46(17)  | 1(14)  |
| C(49) | 83(19)  | 30(17) | 100(30) | 0(18)   | 60(20)  | 16(15) |
| C(50) | 110(20) | 36(14) | 67(19)  | 29(13)  | 55(17)  | 41(15) |
| C(51) | 69(13)  | 43(16) | 56(18)  | 29(14)  | 31(12)  | 36(12) |
| C(52) | 100(20) | 40(17) | 60(20)  | 11(14)  | 54(17)  | 35(15) |
| C(53) | 32(8)   | 24(9)  | 30(11)  | 5(8)    | 11(7)   | 11(7)  |
| C(54) | 100(20) | 70(20) | 51(18)  | -36(15) | -44(15) | 68(19) |
| C(55) | 20(7)   | 20(10) | 48(13)  | 6(9)    | 7(7)    | 5(6)   |
| C(56) | 20(7)   | 30(11) | 32(11)  | -7(8)   | 4(6)    | 7(7)   |
| C(57) | 40(9)   | 29(11) | 31(12)  | 7(9)    | 15(8)   | 18(8)  |

|       |         |         |         |          |         |          |
|-------|---------|---------|---------|----------|---------|----------|
| C(58) | 20(6)   | 27(10)  | 20(9)   | 3(8)     | 5(6)    | 7(6)     |
| C(59) | 33(9)   | 50(15)  | 48(15)  | 4(11)    | 17(9)   | 21(9)    |
| C(60) | 36(8)   | 45(10)  | 33(9)   | 15(8)    | 20(7)   | 17(8)    |
| C(61) | 36(8)   | 27(9)   | 46(12)  | 12(9)    | 22(8)   | 7(7)     |
| C(62) | 34(8)   | 28(11)  | 39(12)  | 6(9)     | 21(8)   | 8(7)     |
| C(63) | 34(8)   | 21(9)   | 24(10)  | 6(7)     | 13(7)   | 8(6)     |
| C(64) | 35(8)   | 23(9)   | 33(11)  | 11(8)    | 12(7)   | 8(7)     |
| C(65) | 140(20) | 26(10)  | 150(30) | 17(14)   | 28(19)  | 25(14)   |
| C(66) | 48(10)  | 21(8)   | 21(9)   | 3(6)     | 0(7)    | 11(7)    |
| C(67) | 61(11)  | 21(8)   | 26(10)  | 5(7)     | 16(9)   | 9(8)     |
| C(68) | 33(8)   | 26(9)   | 29(11)  | 7(8)     | 14(7)   | 13(7)    |
| C(69) | 65(16)  | 42(15)  | 60(20)  | -14(14)  | 8(15)   | 27(13)   |
| C(70) | 32(11)  | 60(20)  | 70(20)  | 30(17)   | -16(11) | 3(11)    |
| N(1)  | 26(6)   | 28(10)  | 22(9)   | 7(8)     | 8(6)    | 12(6)    |
| N(2)  | 21(7)   | 34(11)  | 25(10)  | 12(9)    | 5(6)    | 4(6)     |
| N(3)  | 27(7)   | 28(10)  | 30(11)  | 12(8)    | 9(6)    | 4(6)     |
| N(4)  | 31(6)   | 30(10)  | 23(10)  | 10(8)    | 12(6)   | 15(6)    |
| N(5)  | 20(6)   | 30(10)  | 20(10)  | 6(8)     | 6(6)    | 6(6)     |
| N(6)  | 27(7)   | 21(10)  | 30(11)  | 2(8)     | 14(6)   | 3(6)     |
| O(1)  | 31(6)   | 23(9)   | 28(9)   | 9(7)     | 7(5)    | 8(5)     |
| O(2)  | 27(6)   | 22(9)   | 44(11)  | 4(8)     | 19(6)   | 4(6)     |
| F(1)  | 200(20) | 130(20) | 150(20) | -29(16)  | 86(19)  | 56(18)   |
| F(2)  | 118(19) | 300(50) | 140(30) | -170(30) | 110(20) | -150(30) |
| F(3)  | 109(18) | 340(60) | 57(16)  | -10(20)  | 63(15)  | -30(30)  |
| F(4)  | 73(13)  | 210(40) | 100(20) | 100(20)  | 19(13)  | 19(18)   |
| F(5)  | 47(6)   | 74(11)  | 65(11)  | 40(9)    | 19(6)   | 15(7)    |
| F(6)  | 77(10)  | 87(15)  | 58(11)  | -6(10)   | 18(8)   | -33(10)  |
| F(7)  | 64(10)  | 76(13)  | 90(13)  | -22(12)  | -23(9)  | 46(10)   |
| F(8)  | 74(9)   | 34(8)   | 74(11)  | -13(7)   | -8(8)   | 29(7)    |
| F(9)  | 126(15) | 72(12)  | 136(18) | 63(13)   | 107(15) | 76(12)   |
| F(10) | 60(8)   | 64(11)  | 44(9)   | -15(8)   | -1(6)   | -3(7)    |
| F(11) | 39(7)   | 42(10)  | 140(20) | 49(13)   | -8(10)  | -10(6)   |
| F(12) | 37(5)   | 27(6)   | 78(11)  | 2(7)     | 17(6)   | -6(5)    |
| Cl(1) | 23(2)   | 35(3)   | 34(3)   | 11(2)    | 12(2)   | 6(2)     |
| Cl(2) | 23(2)   | 23(2)   | 30(3)   | 9(2)     | 7(1)    | 7(1)     |
| Au(1) | 22(1)   | 22(1)   | 22(1)   | 7(1)     | 8(1)    | 7(1)     |

Au(2) 22(1) 22(1) 22(1) 6(1) 7(1) 7(1)

Table 5. Hydrogen coordinates ( $\times 10^4$ ) and isotropic displacement parameters ( $\text{\AA}^2 \times 10^3$ ) for cmh\_sp\_4.

|        | x     | y    | z     | U(eq) |
|--------|-------|------|-------|-------|
| H(3)   | -2314 | 1580 | 2858  | 32    |
| H(4)   | -4125 | 1965 | 1967  | 31    |
| H(5)   | -4100 | 2796 | 572   | 34    |
| H(7A)  | -3057 | 4318 | 51    | 44    |
| H(7B)  | -3910 | 3323 | -834  | 44    |
| H(9A)  | -4574 | 4465 | -1870 | 41    |
| H(9B)  | -3661 | 5467 | -1031 | 41    |
| H(10A) | -1310 | 5580 | -429  | 41    |
| H(10B) | -787  | 4635 | -884  | 41    |
| H(11A) | -3752 | 3054 | -2563 | 54    |
| H(11B) | -2274 | 3094 | -2184 | 54    |
| H(12)  | -4173 | 5880 | -2653 | 39    |
| H(13A) | -4492 | 4180 | -3834 | 73    |
| H(13B) | -3471 | 5034 | -4101 | 73    |
| H(14)  | -2748 | 3515 | -3893 | 72    |
| H(15A) | -2042 | 6498 | -2792 | 50    |
| H(15B) | -2056 | 6754 | -1599 | 50    |
| H(16A) | -1281 | 5024 | -3537 | 66    |
| H(16B) | -827  | 4246 | -2839 | 66    |
| H(17)  | -309  | 6016 | -1718 | 52    |
| H(20)  | 4188  | 322  | 1997  | 38    |
| H(24A) | 3277  | 1678 | 5474  | 35    |
| H(24B) | 4592  | 2380 | 5448  | 35    |
| H(25A) | 4105  | 199  | 5414  | 45    |
| H(25B) | 5033  | 1100 | 6369  | 45    |

|        |       |      |       |    |
|--------|-------|------|-------|----|
| H(26A) | 6280  | 386  | 5406  | 40 |
| H(26B) | 6361  | 1556 | 5278  | 40 |
| H(27A) | 5941  | 631  | 3578  | 48 |
| H(27B) | 4940  | -307 | 3737  | 48 |
| H(29)  | 4036  | 901  | 464   | 48 |
| H(31)  | 1117  | -4   | -2178 | 60 |
| H(33)  | 421   | 402  | 638   | 80 |
| H(38)  | 6787  | 3106 | 4394  | 32 |
| H(39)  | 8515  | 3830 | 3919  | 45 |
| H(40)  | 8371  | 5299 | 3080  | 46 |
| H(42A) | 7260  | 5823 | 1533  | 41 |
| H(42B) | 8152  | 6644 | 2565  | 41 |
| H(44A) | 6372  | 8132 | 2761  | 59 |
| H(44B) | 7860  | 8503 | 2887  | 59 |
| H(45A) | 7835  | 6877 | 470   | 46 |
| H(45B) | 8761  | 7763 | 1441  | 46 |
| H(46A) | 5512  | 6285 | 333   | 39 |
| H(46B) | 4946  | 6774 | 1226  | 39 |
| H(47)  | 8192  | 8523 | -55   | 56 |
| H(48A) | 7609  | 9919 | 837   | 73 |
| H(48B) | 8644  | 9538 | 1625  | 73 |
| H(49)  | 6838  | 9725 | 2343  | 78 |
| H(50A) | 4679  | 8547 | 1322  | 71 |
| H(50B) | 5183  | 9247 | 586   | 71 |
| H(51)  | 4450  | 7536 | -247  | 58 |
| H(52A) | 6255  | 7311 | -843  | 72 |
| H(52B) | 6099  | 8471 | -815  | 72 |
| H(57)  | 368   | 4090 | 5627  | 38 |
| H(59A) | -671  | 2498 | 6127  | 50 |
| H(59B) | -1499 | 2019 | 4947  | 50 |
| H(60A) | -1374 | 753  | 5829  | 41 |
| H(60B) | 144   | 1095 | 6149  | 41 |
| H(61A) | -1415 | 387  | 4032  | 41 |
| H(61B) | -688  | -327 | 4659  | 41 |
| H(62A) | 1249  | 556  | 4626  | 38 |
| H(62B) | 377   | 527  | 3496  | 38 |

|       |      |      |      |     |
|-------|------|------|------|-----|
| H(63) | 379  | 5548 | 4998 | 30  |
| H(65) | 4075 | 5519 | 5494 | 126 |
| H(67) | 3085 | 8254 | 5885 | 42  |
| H(1)  | 375  | 1764 | 2105 | 29  |
| H(2)  | -110 | 3097 | 399  | 31  |
| H(4A) | 4047 | 3747 | 4157 | 31  |
| H(5A) | 4419 | 5514 | 2777 | 28  |

### HPLC traces:

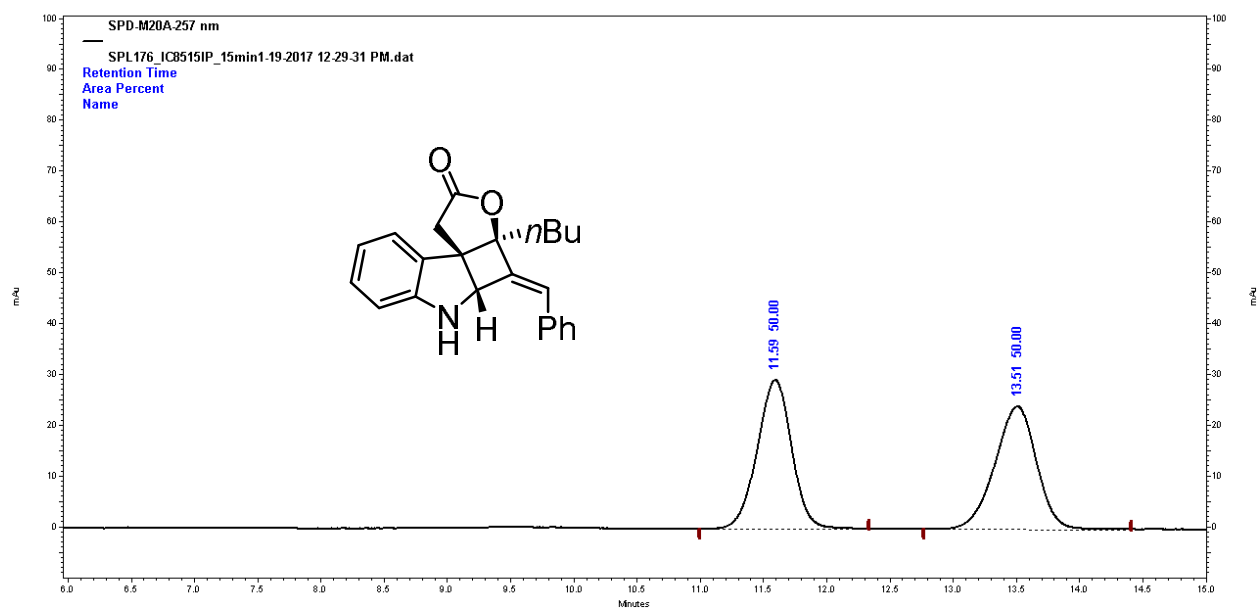

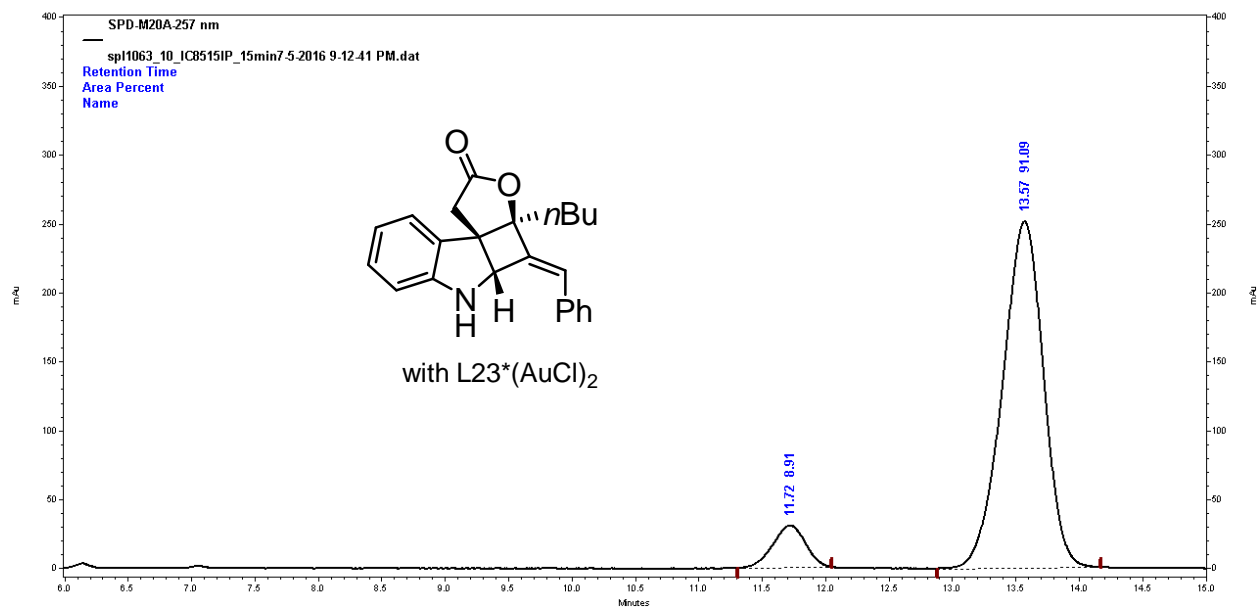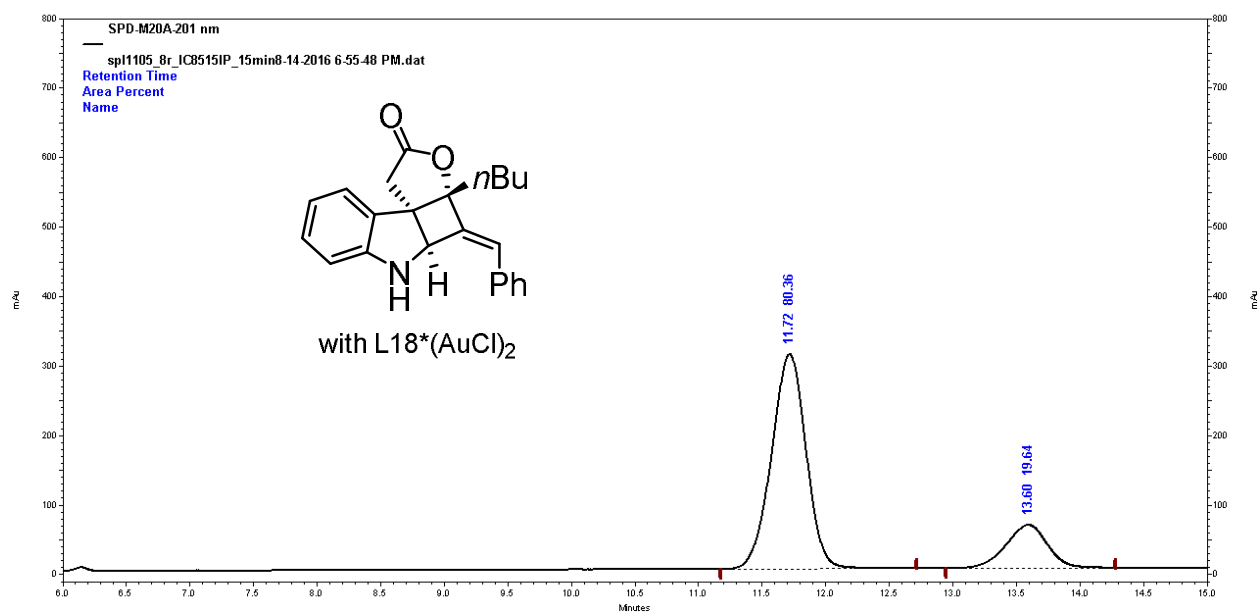



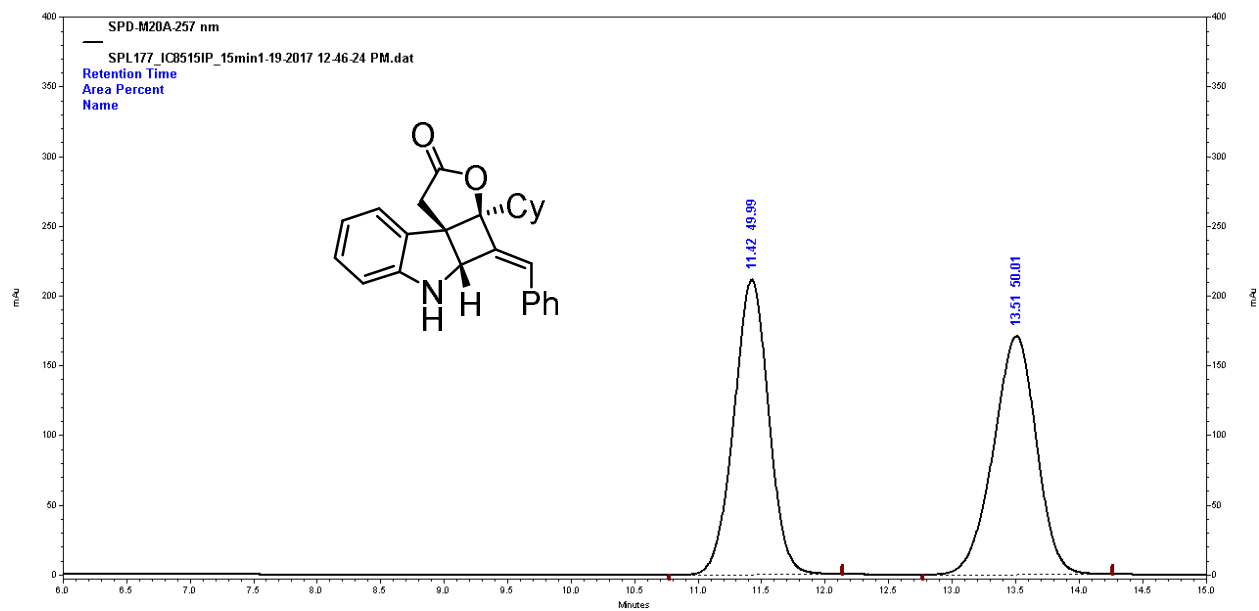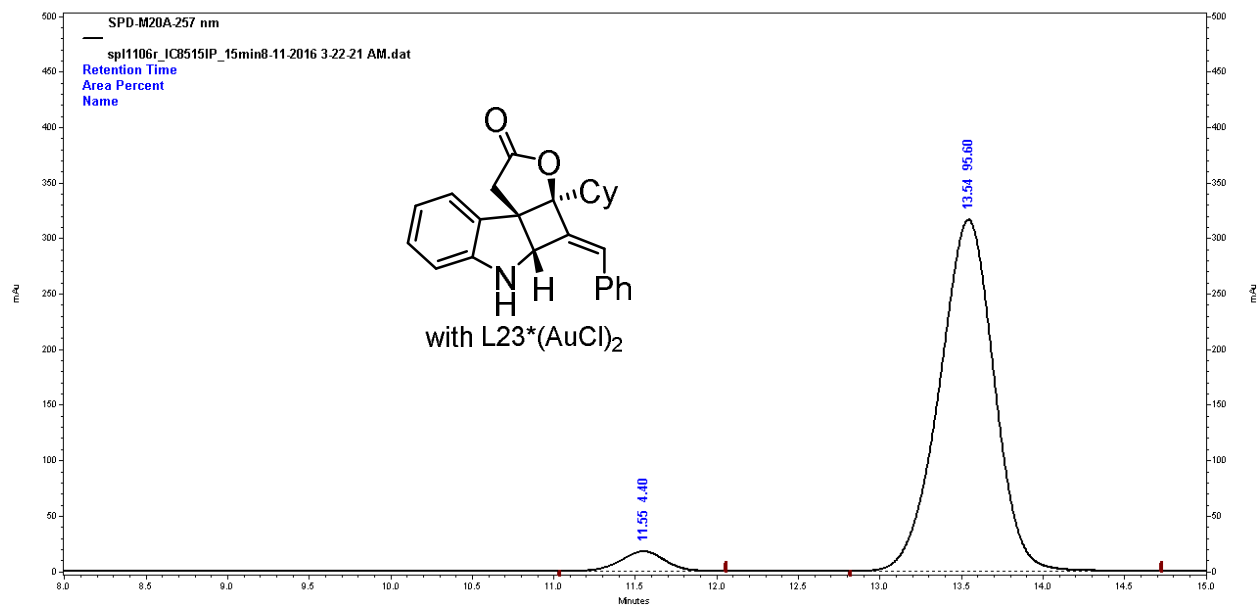

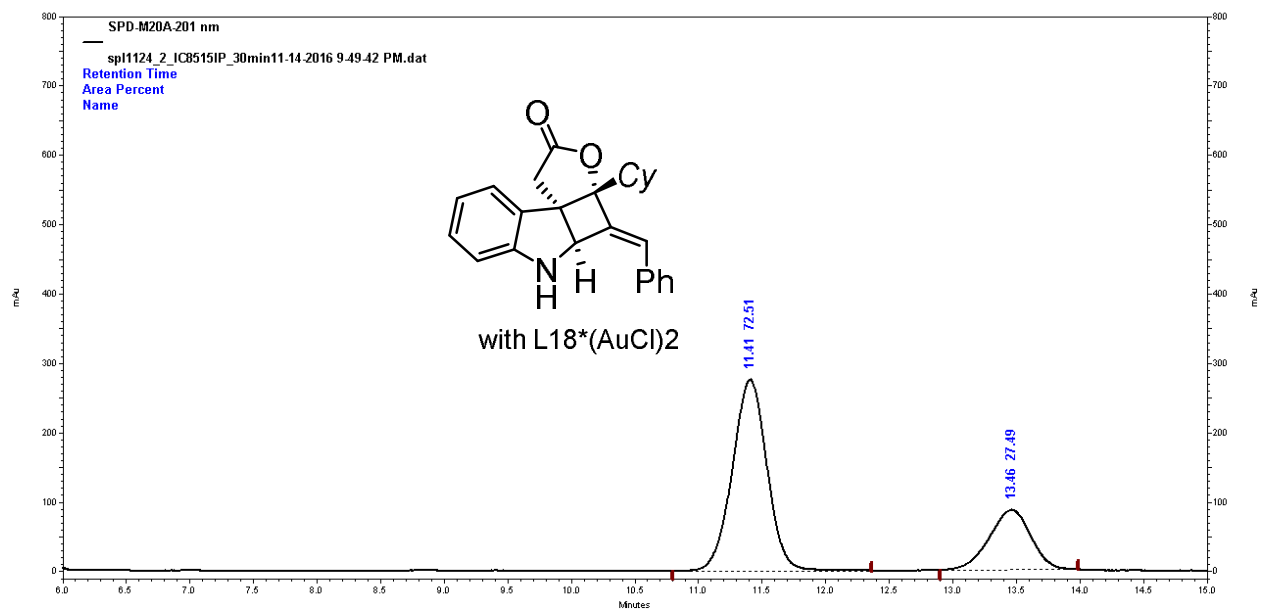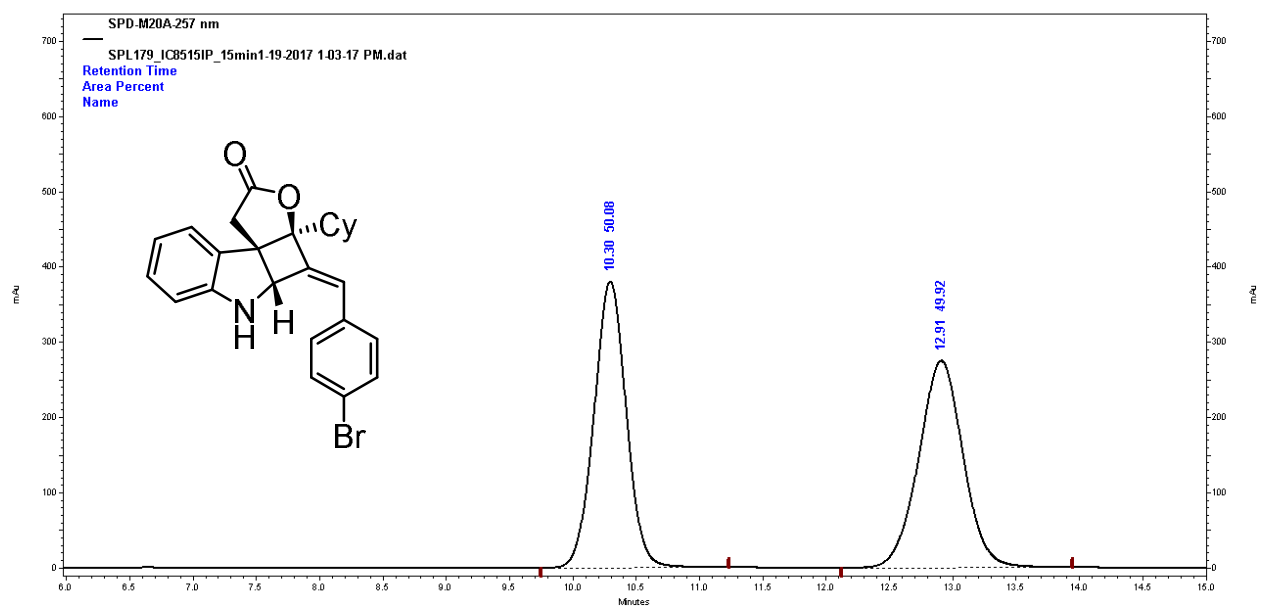

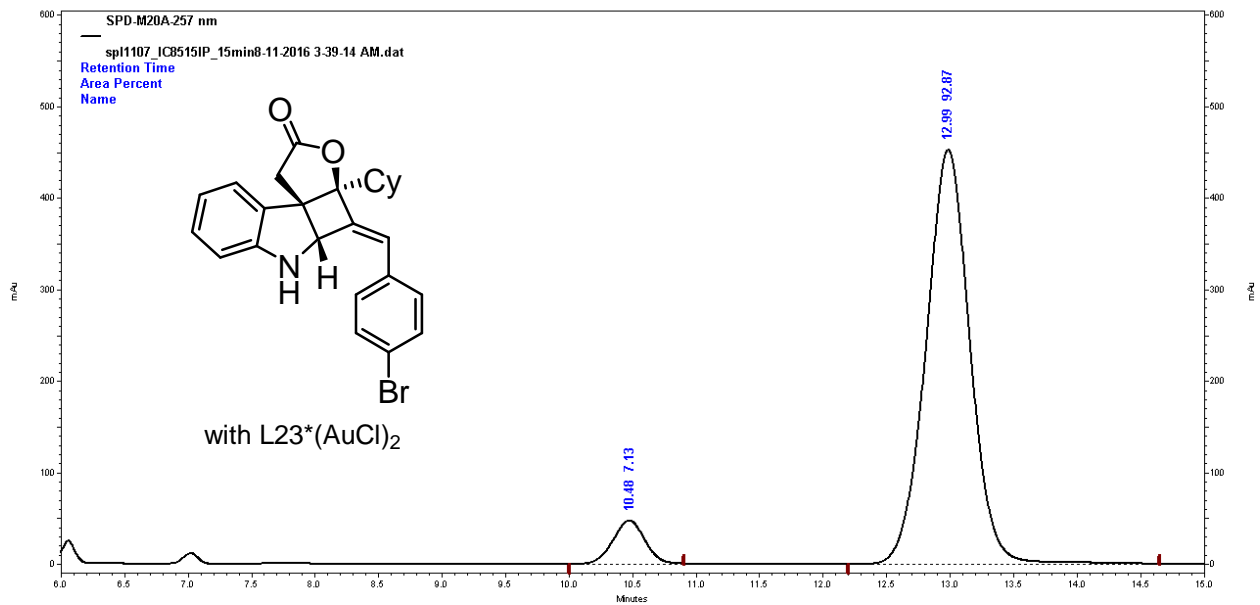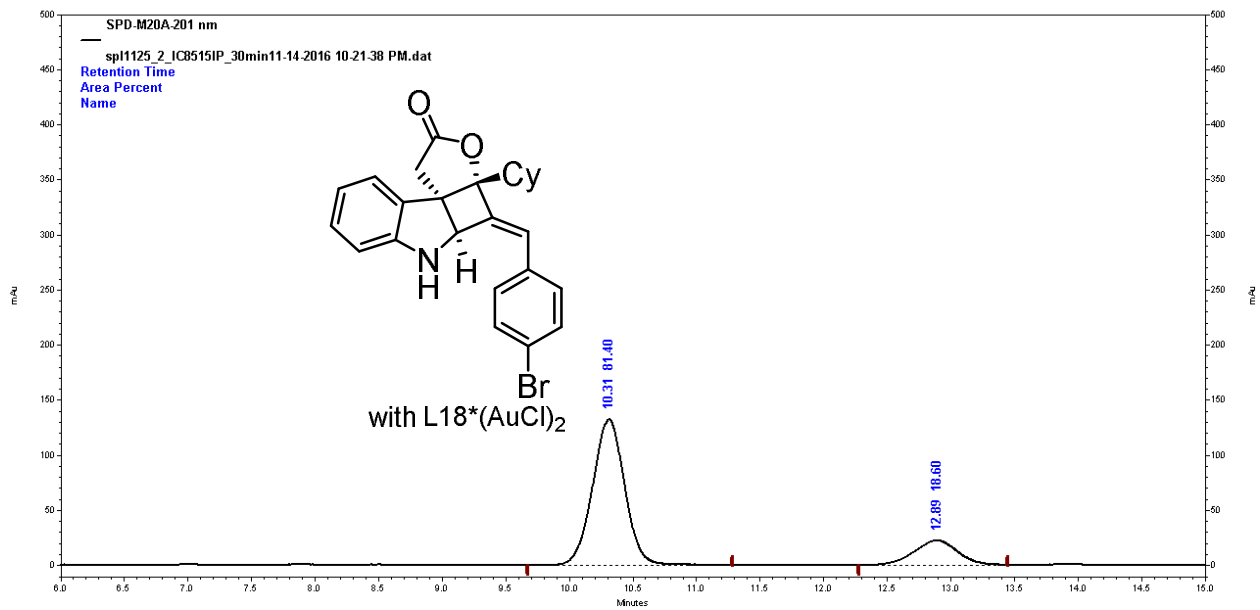

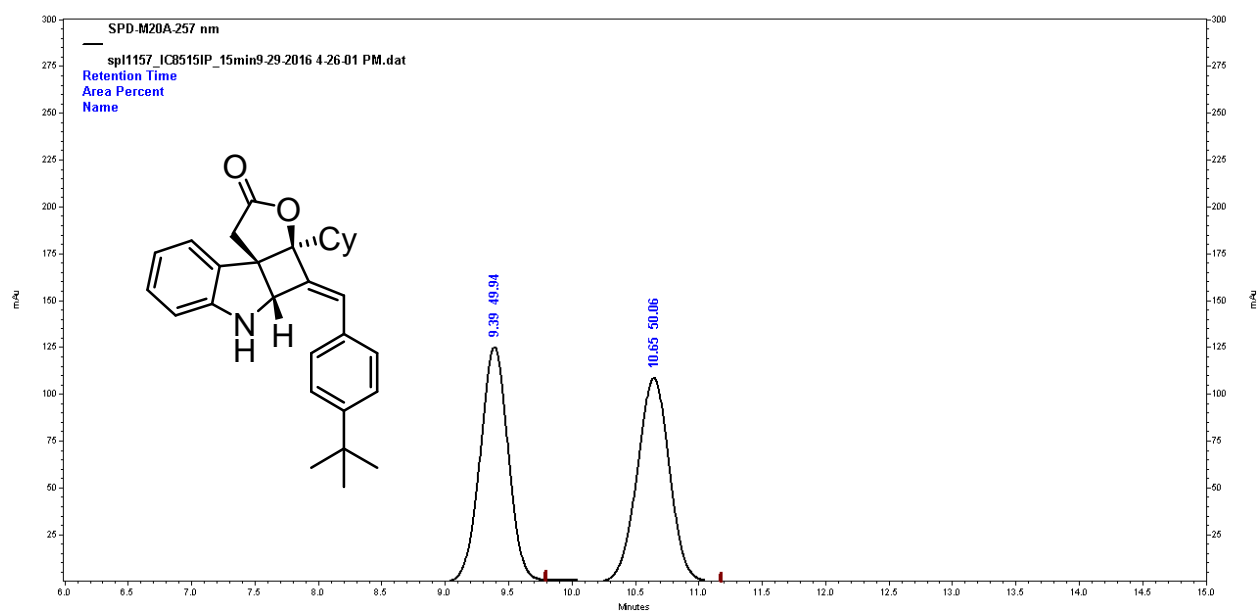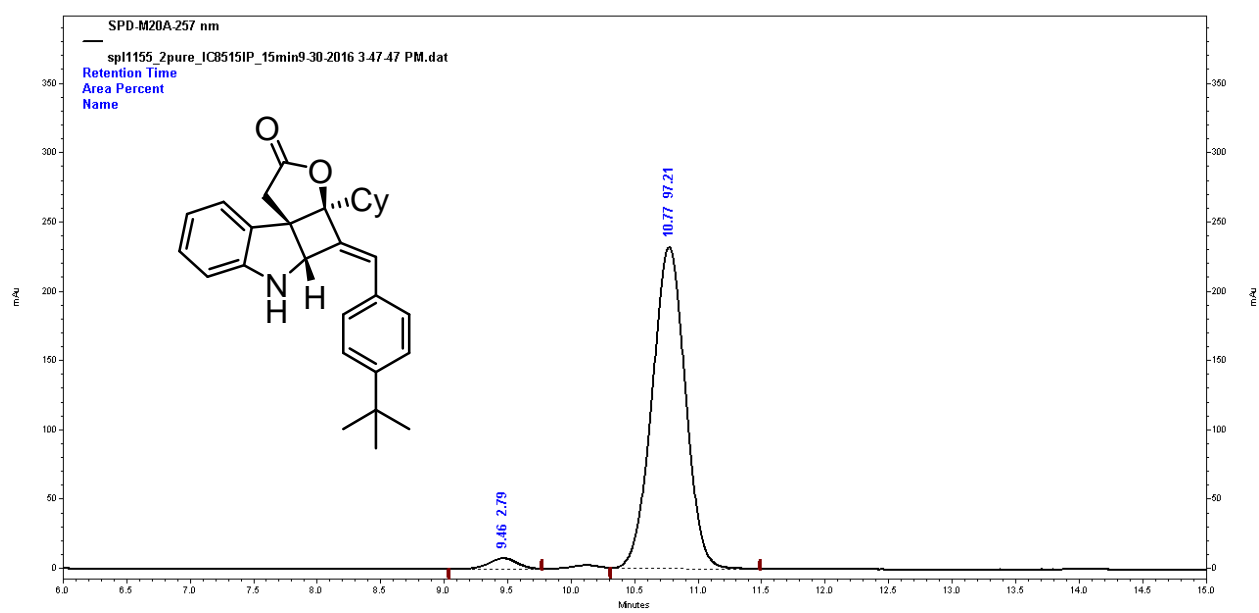

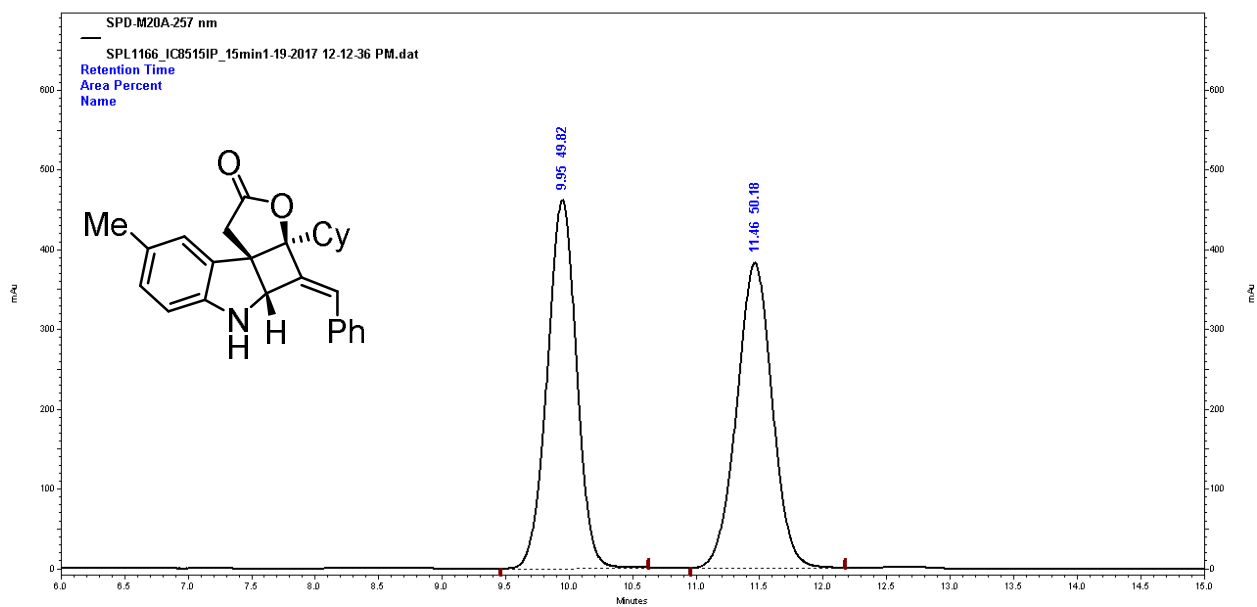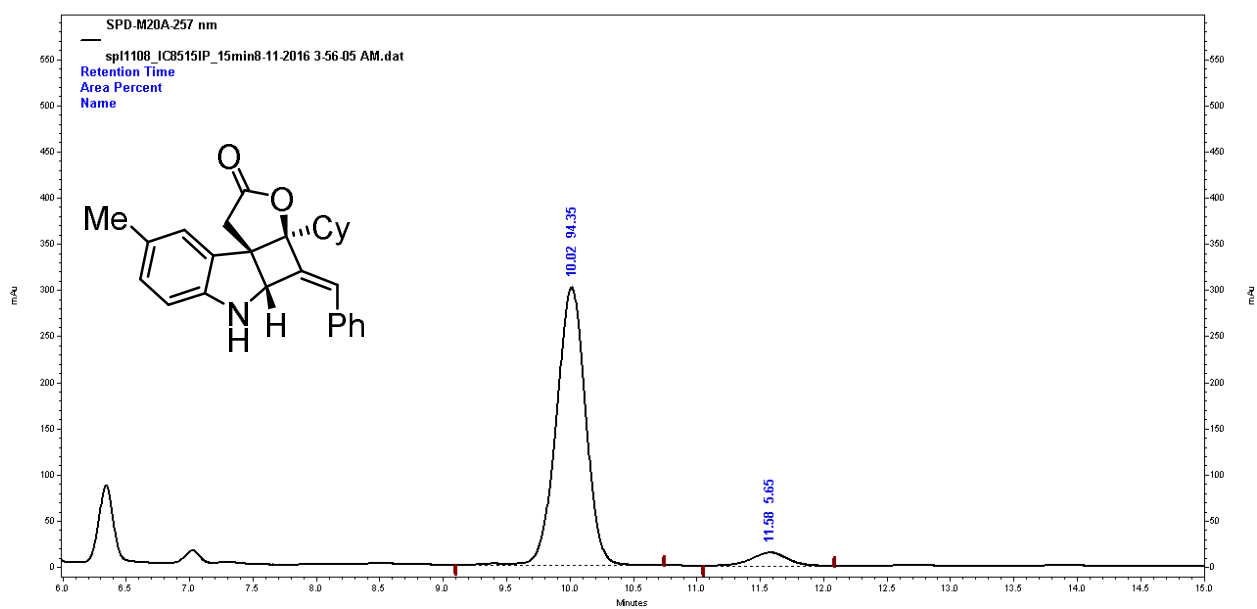

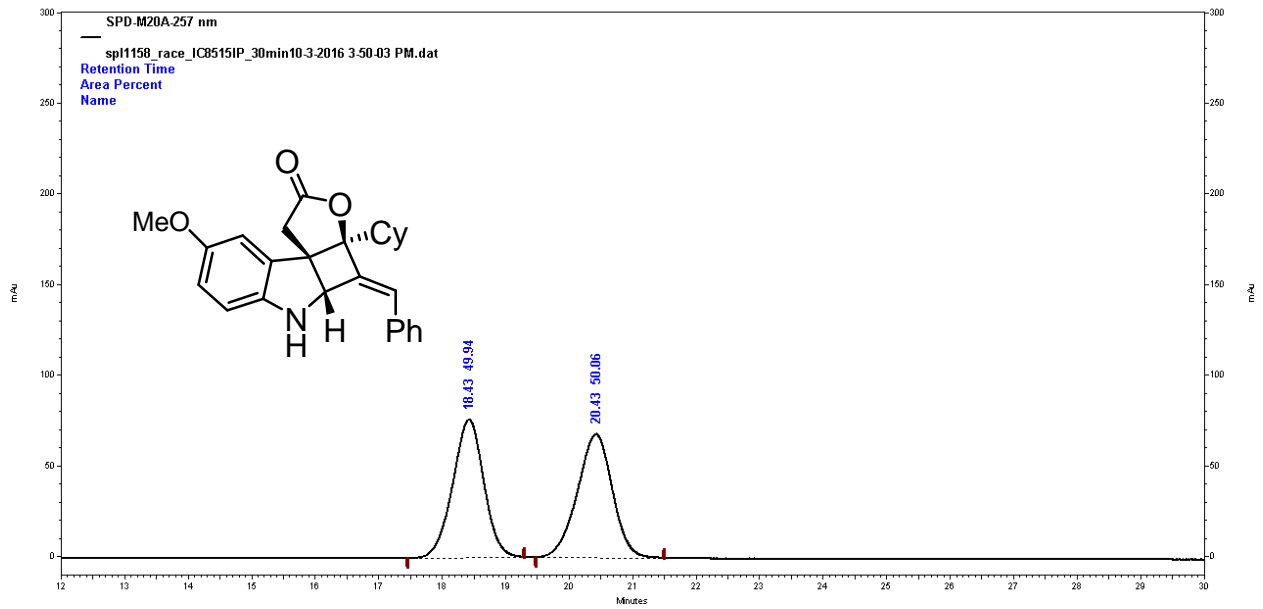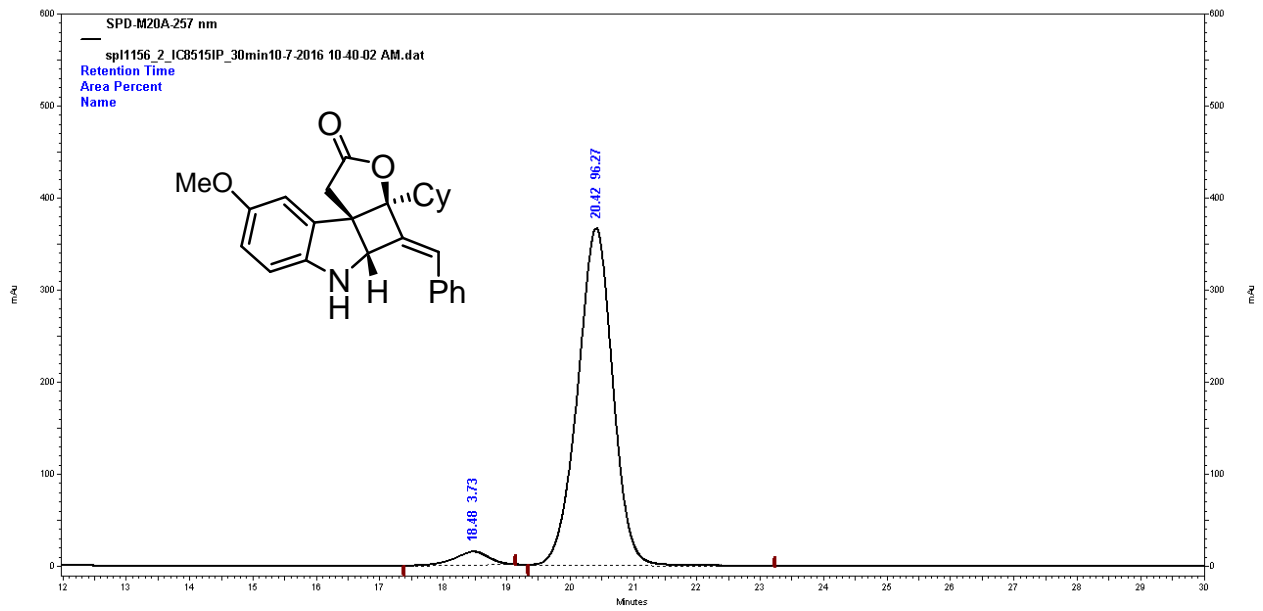

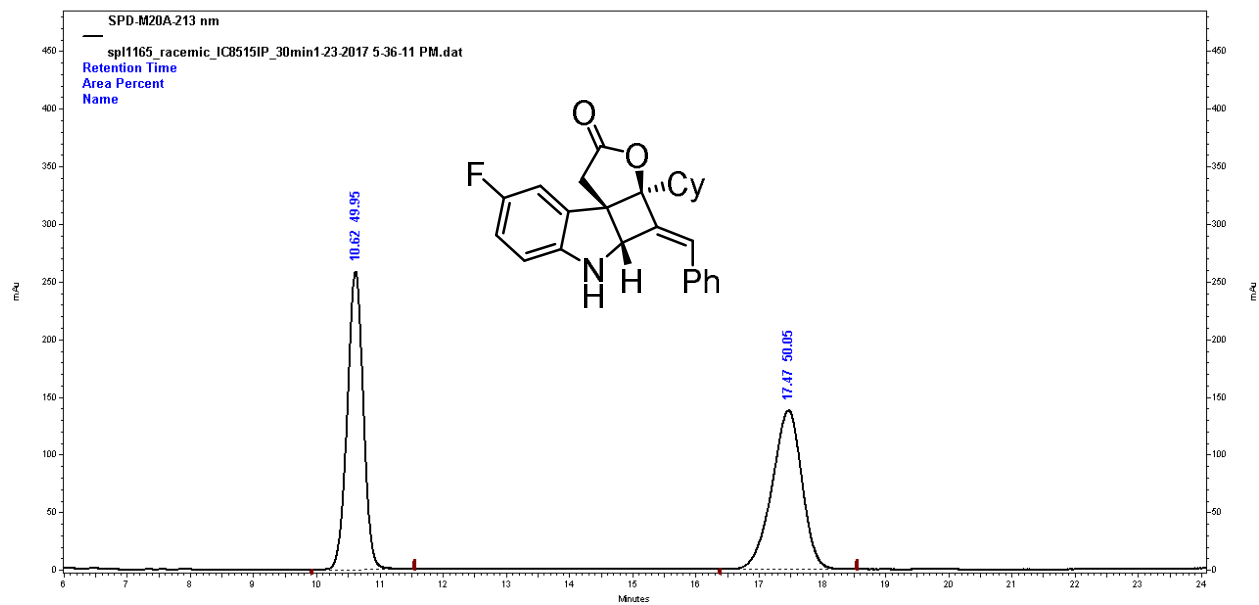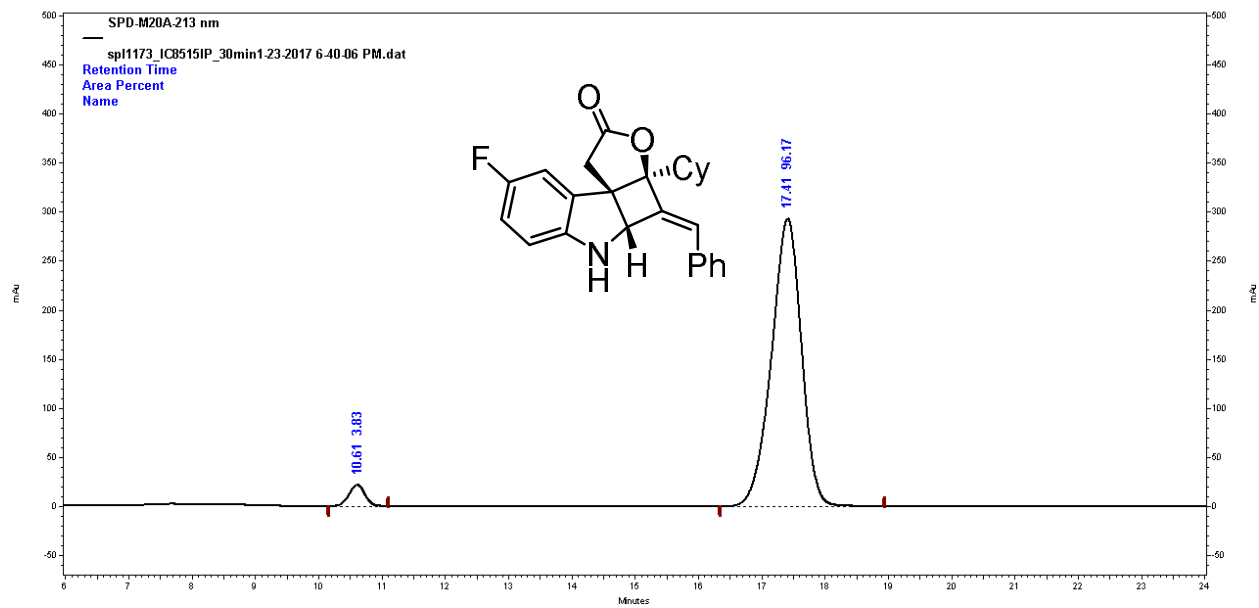

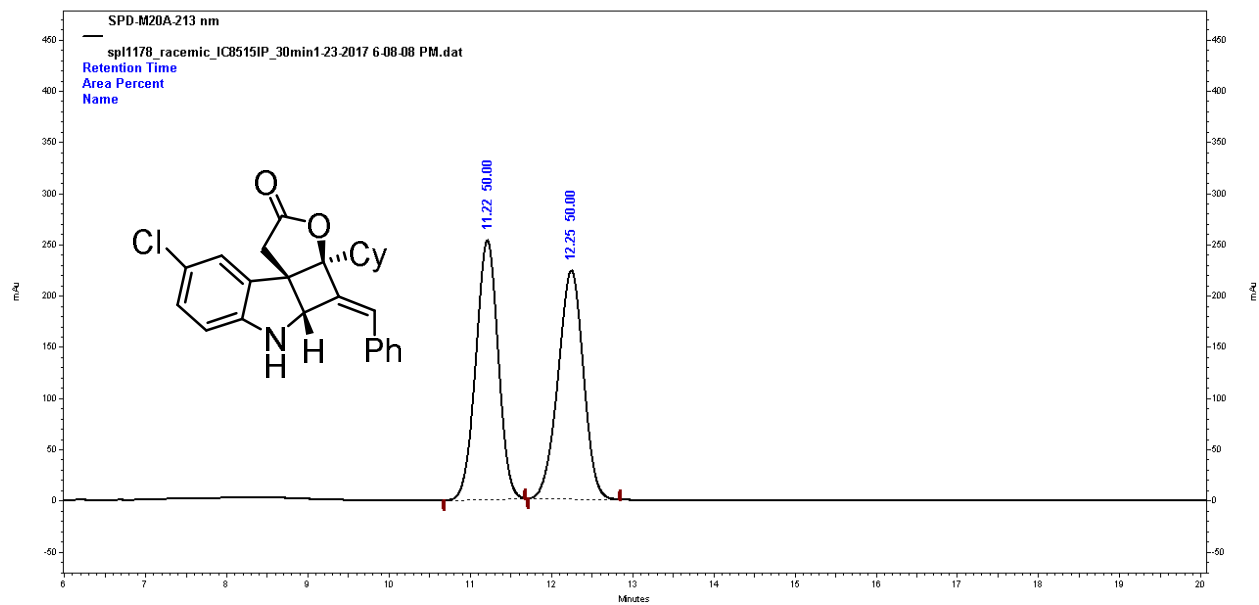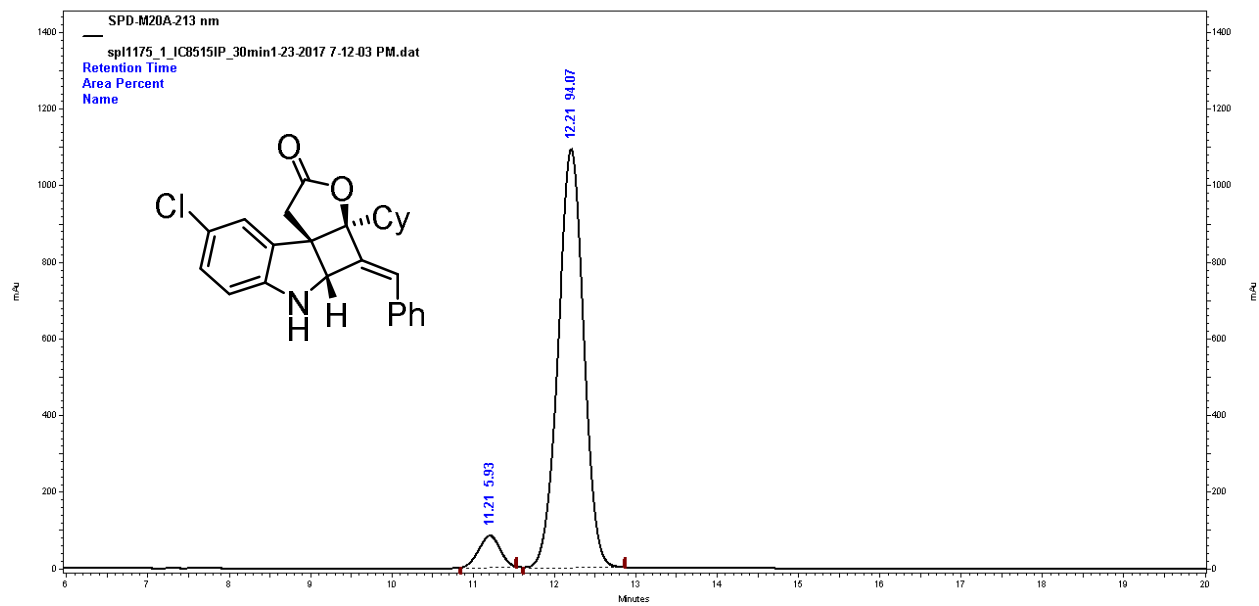



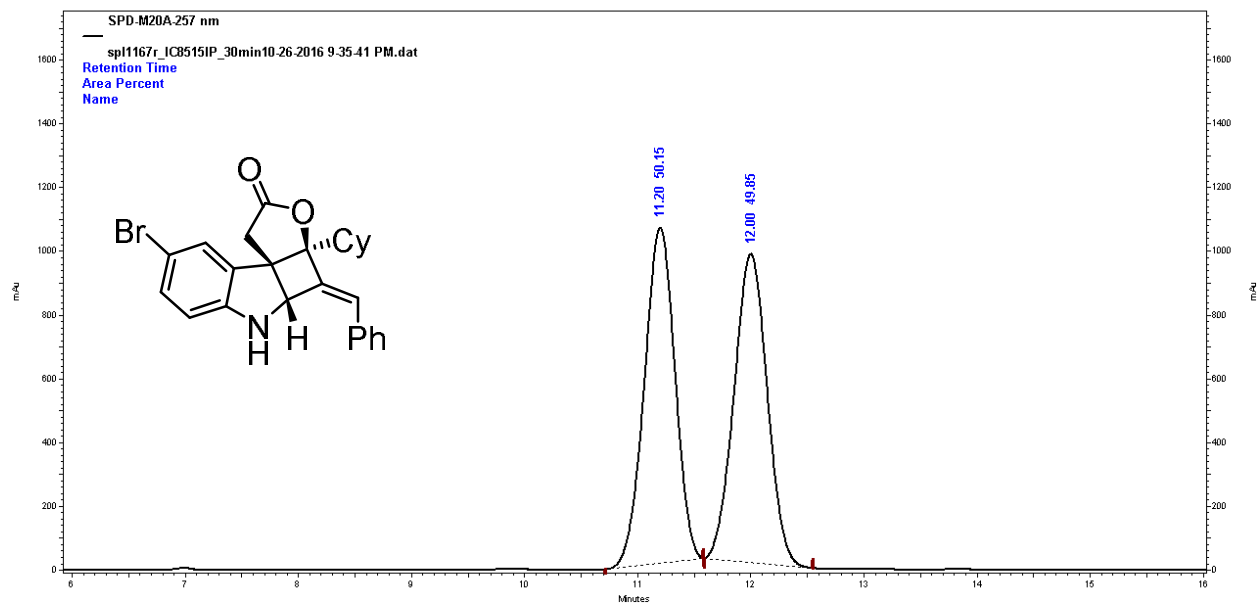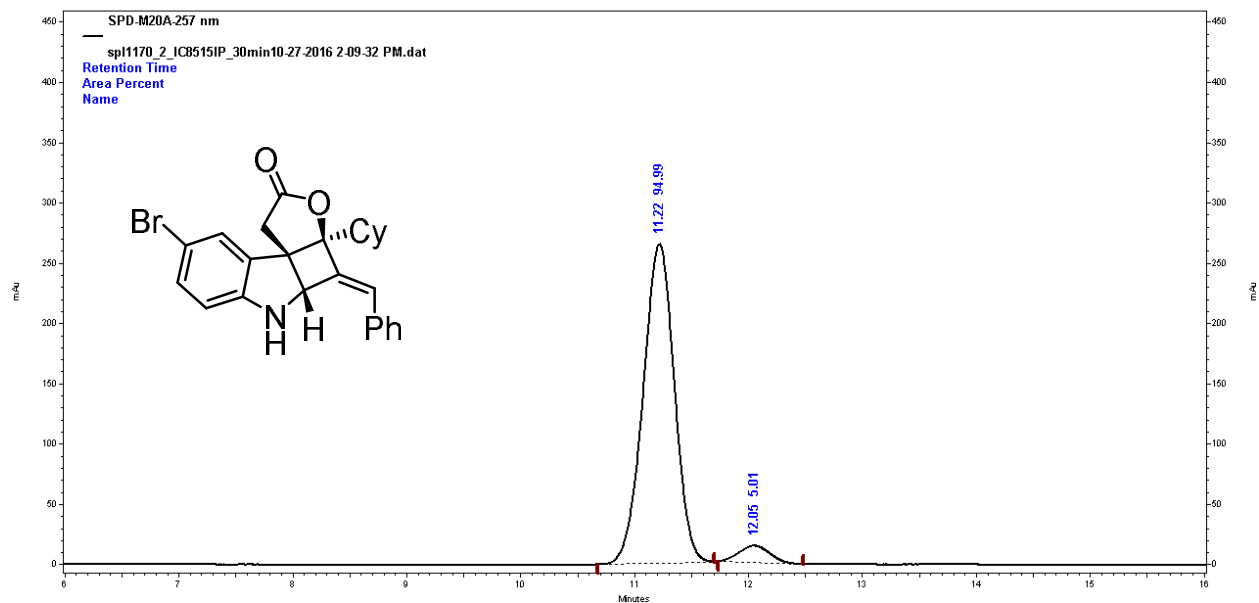

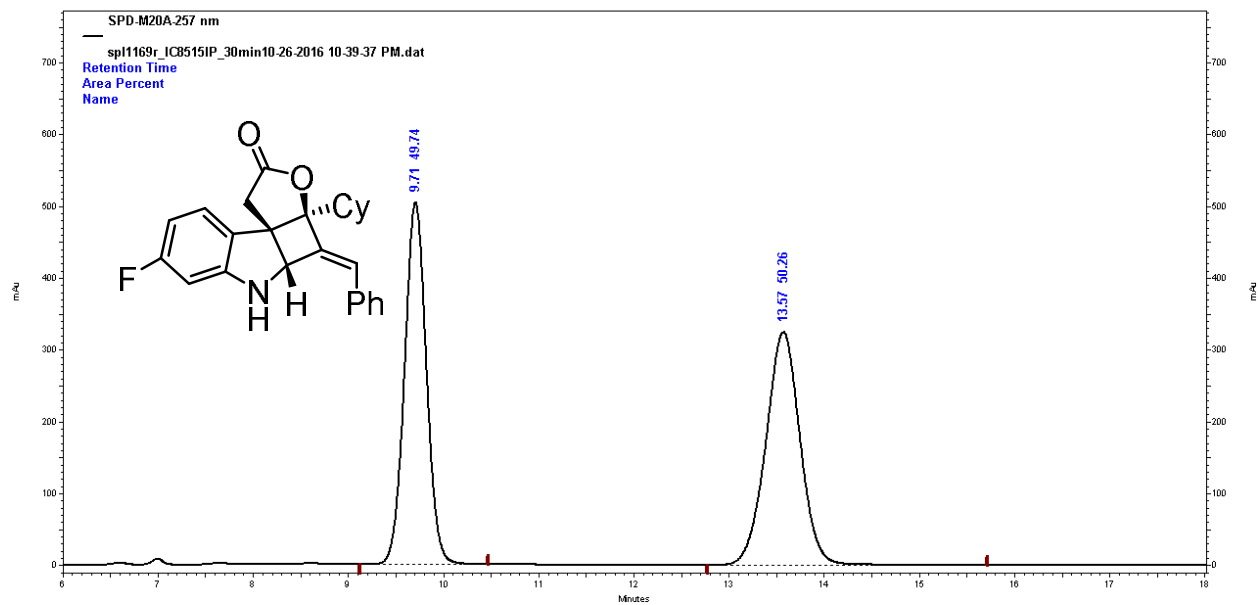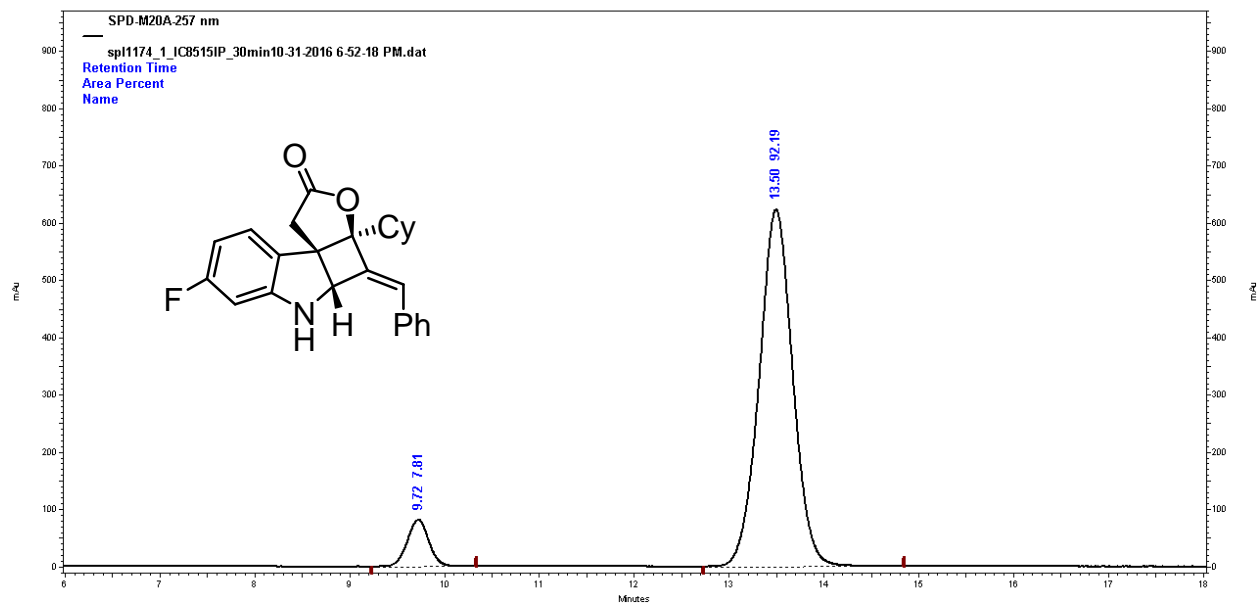

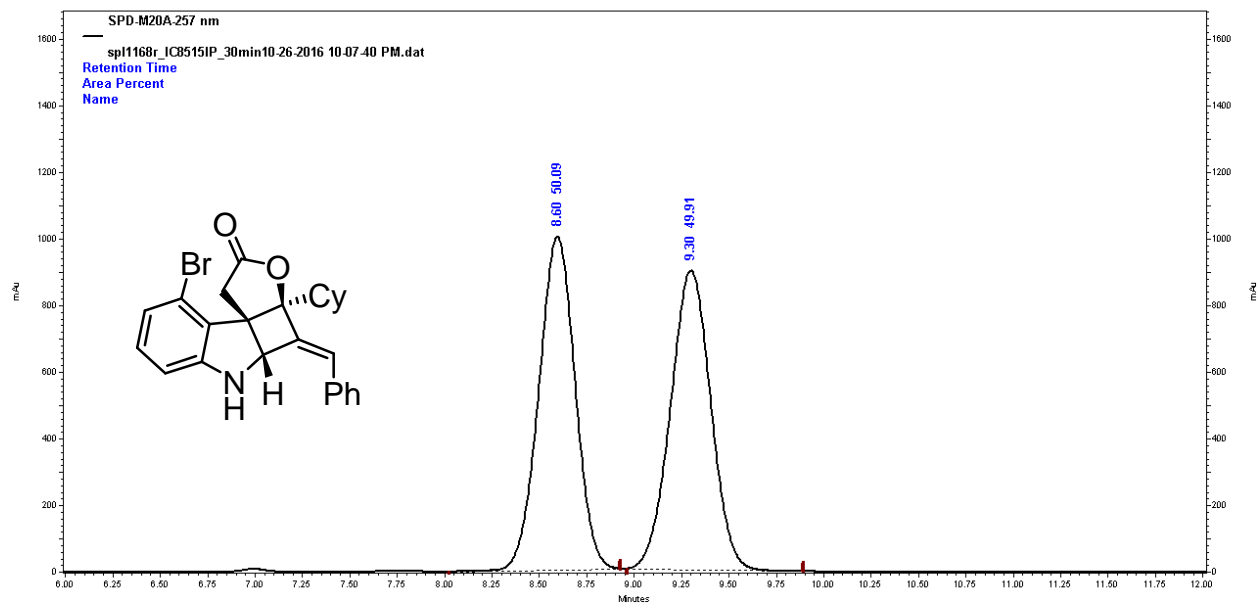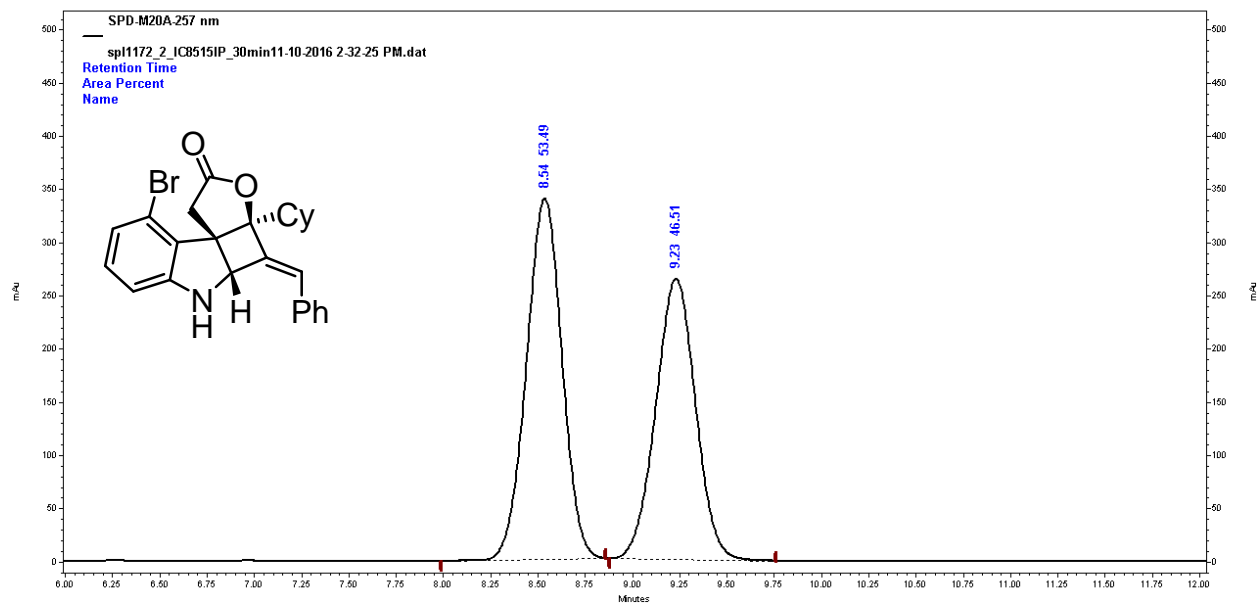

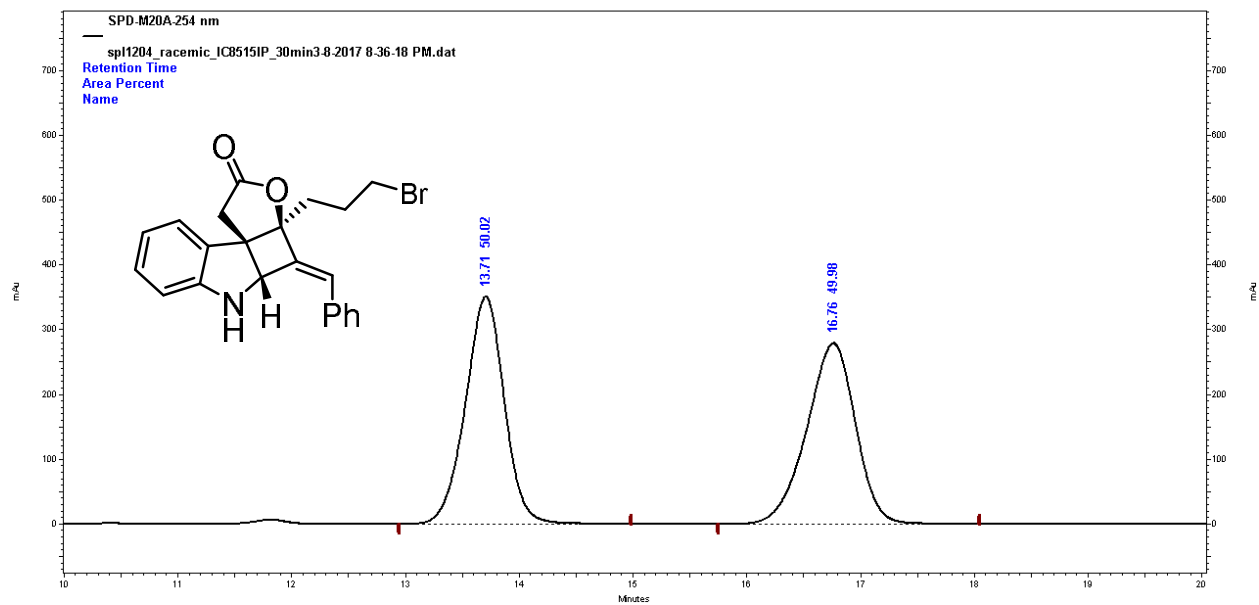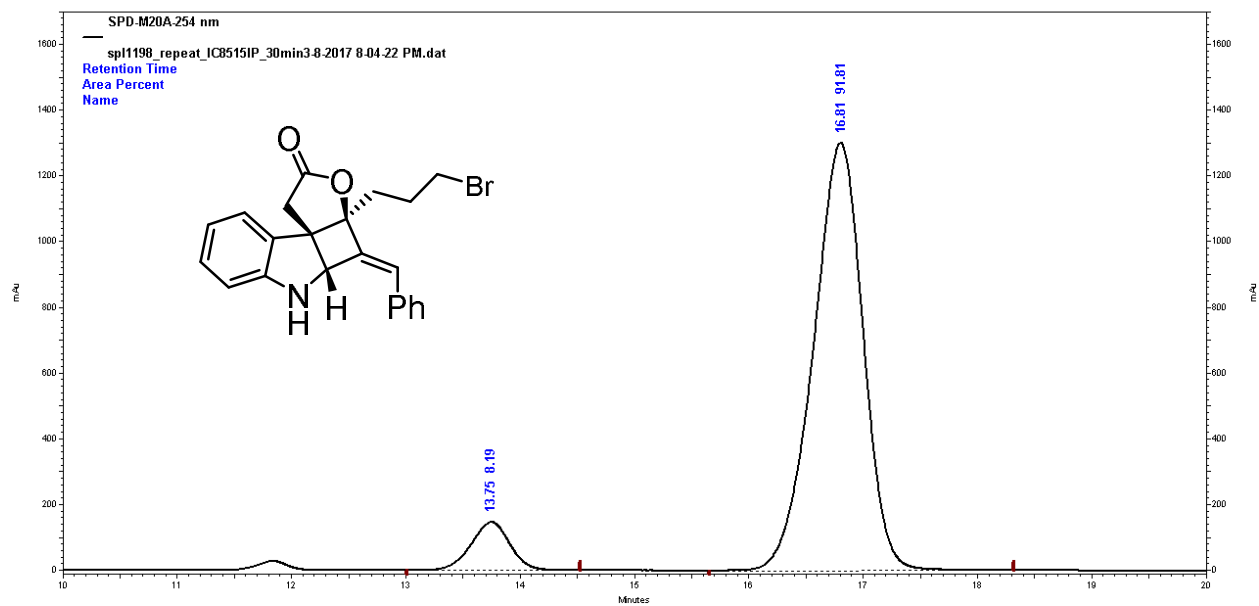

# $^1\text{H}$ and $^{13}\text{C}$ NMR Spectra:

## Complex L1\*(AuCl)<sub>2</sub>

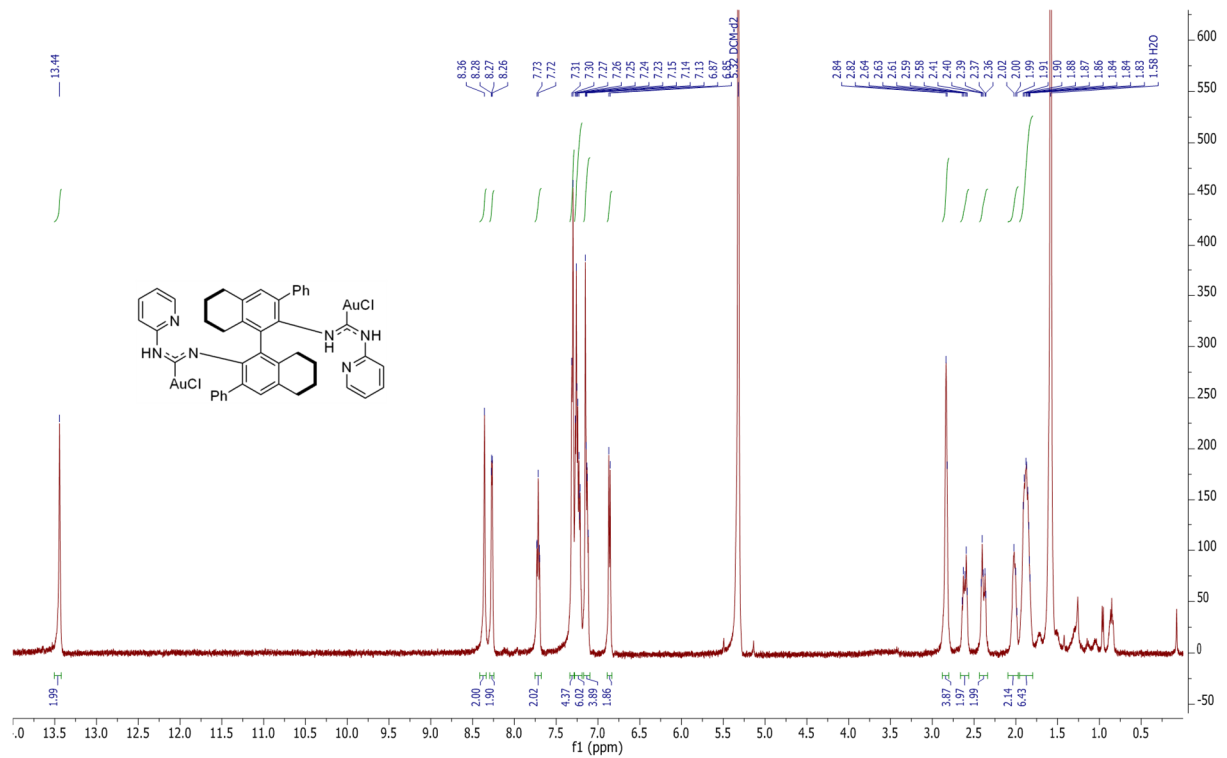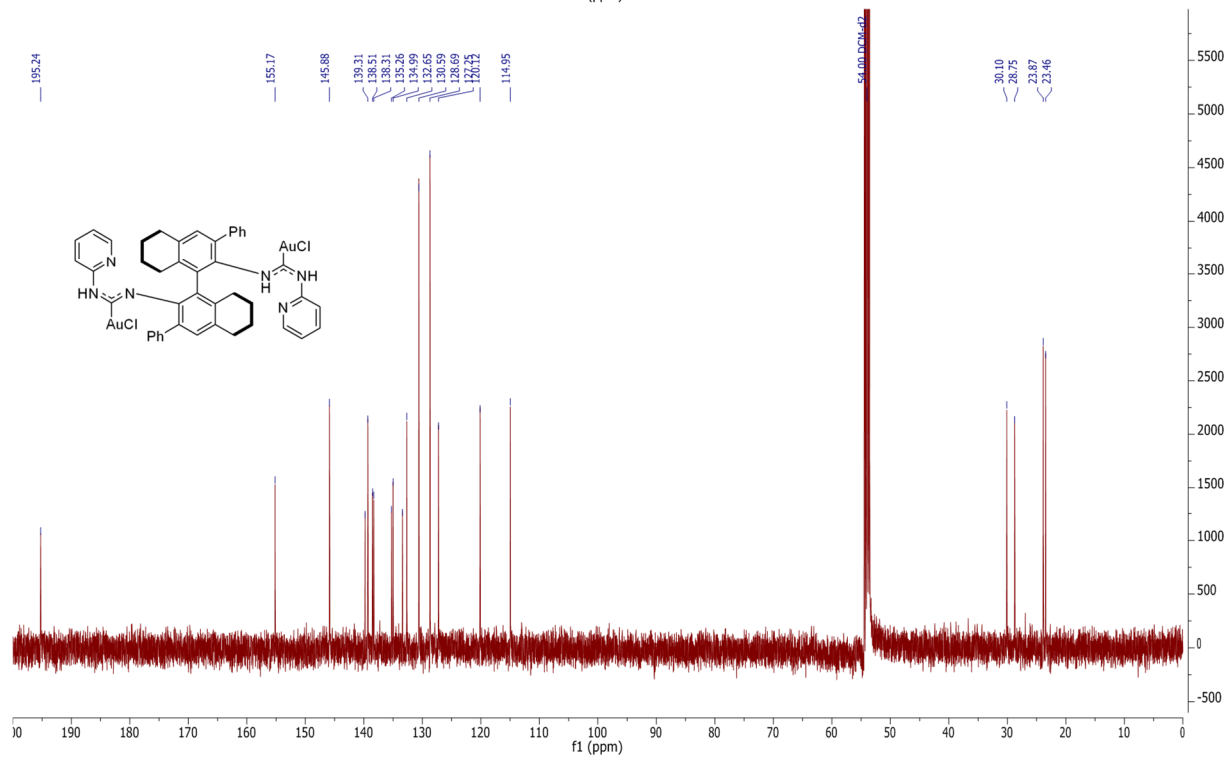

# Complex L2\*(AuCl)<sub>2</sub>

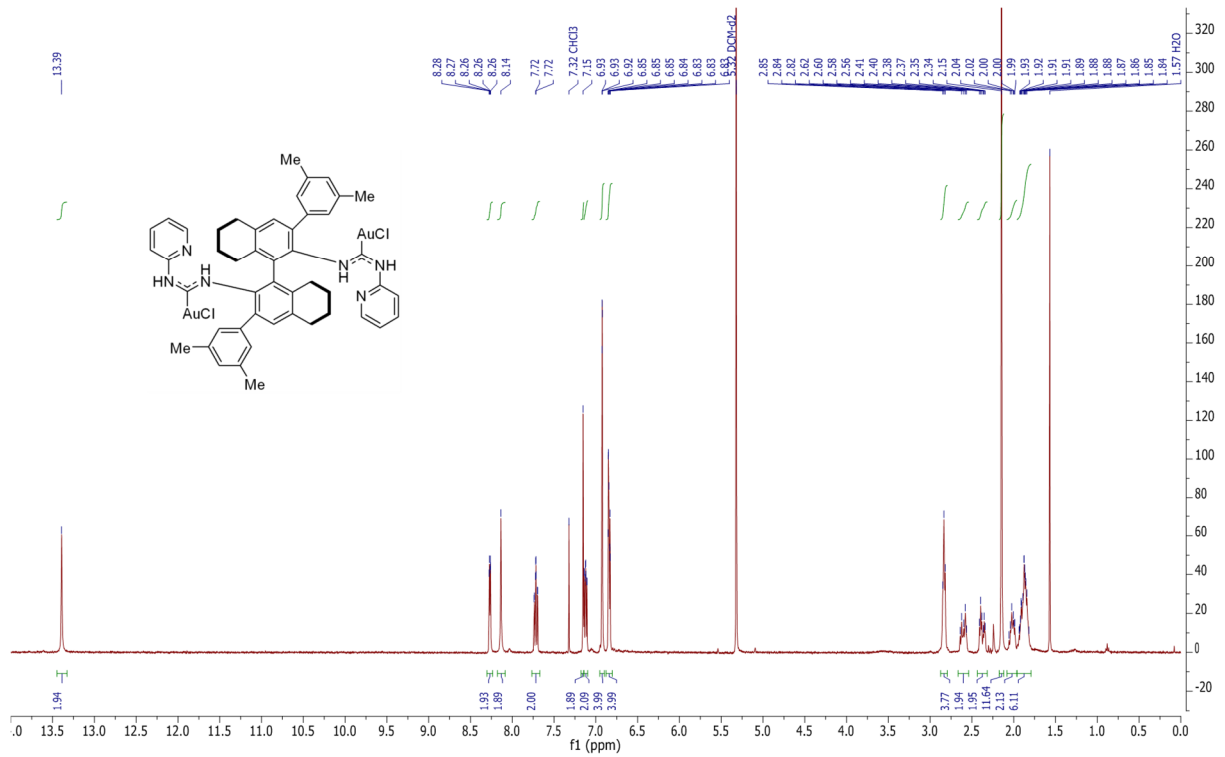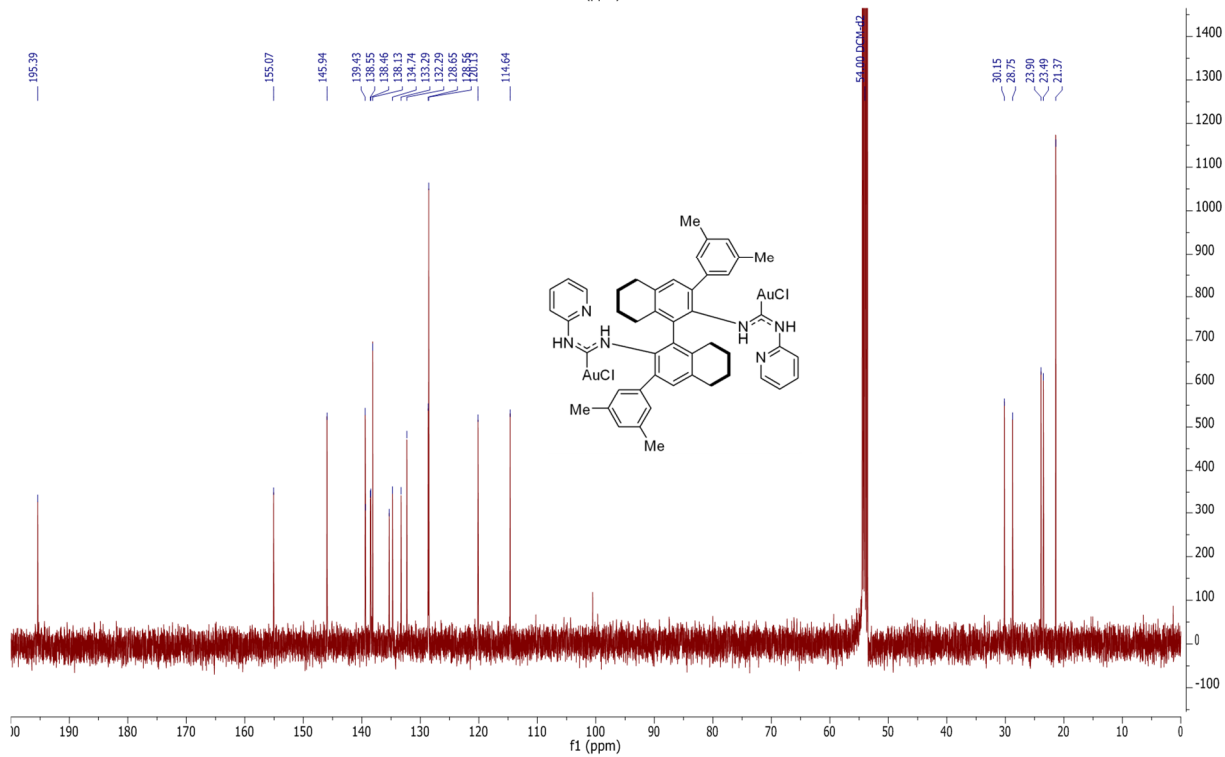

# Complex L3\*(AuCl)<sub>2</sub>

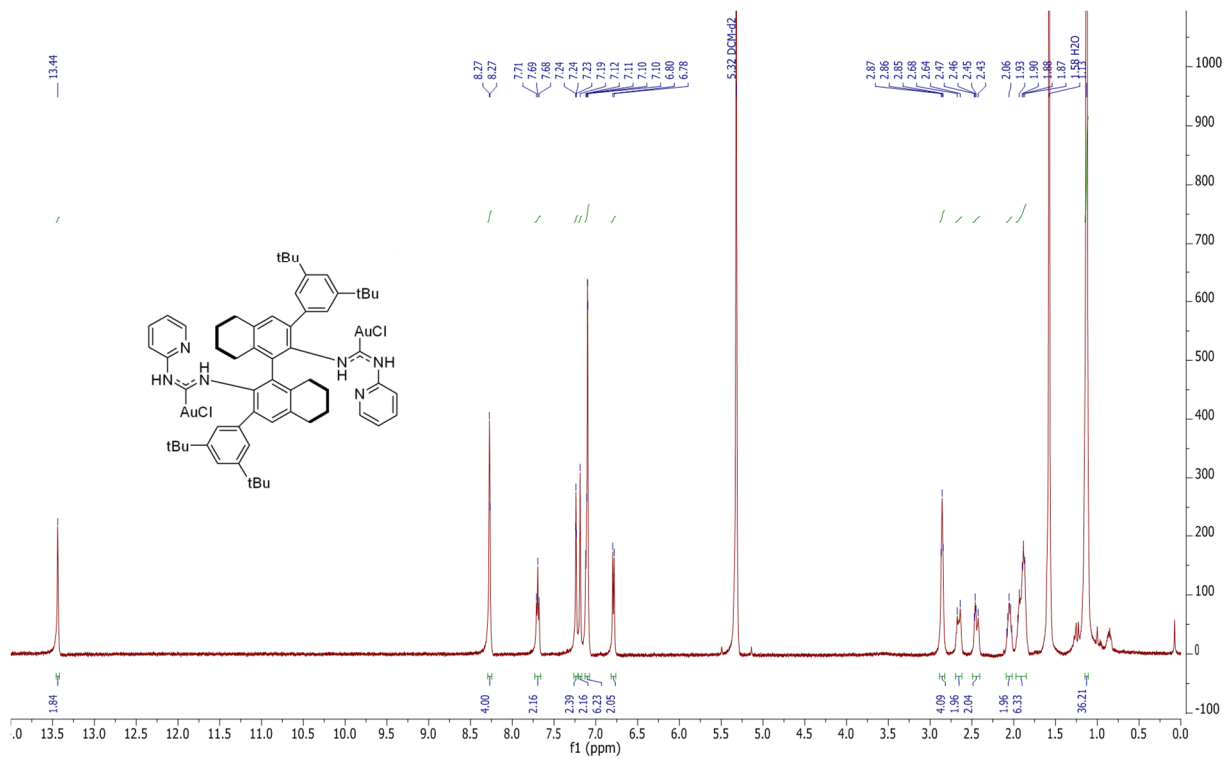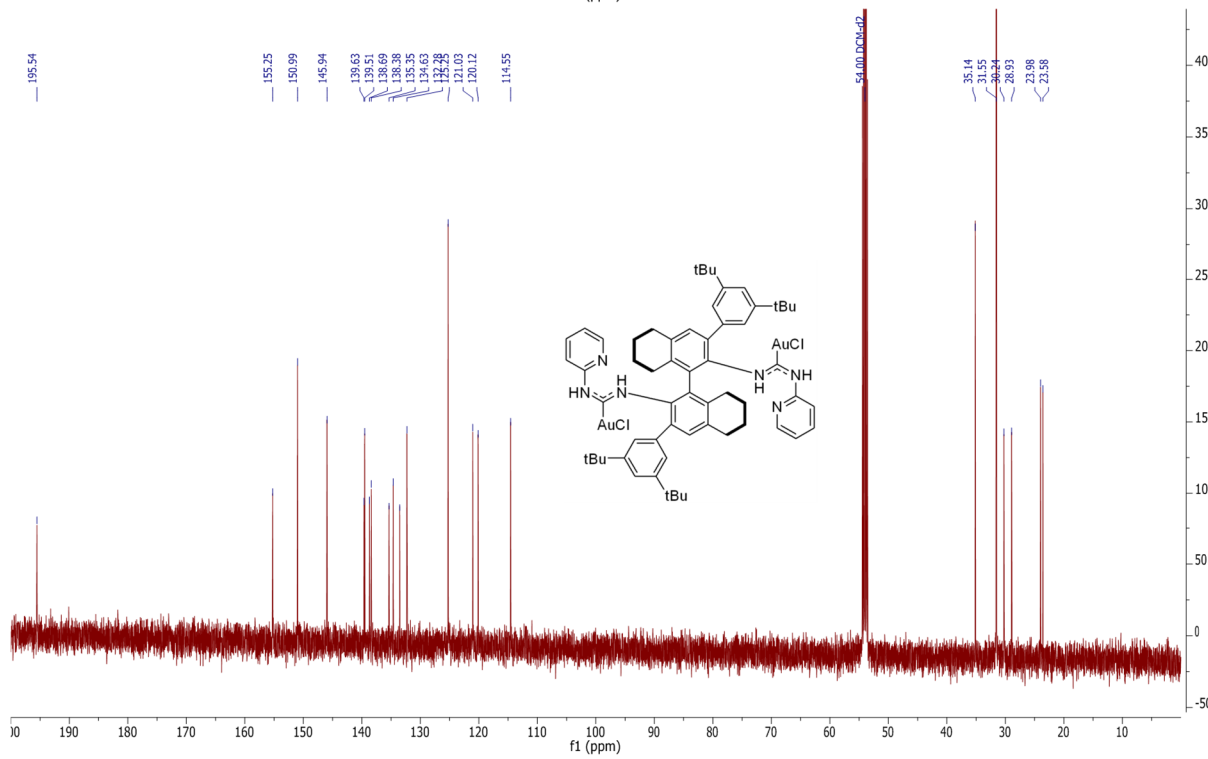

# Complex L4\*(AuCl)<sub>2</sub>

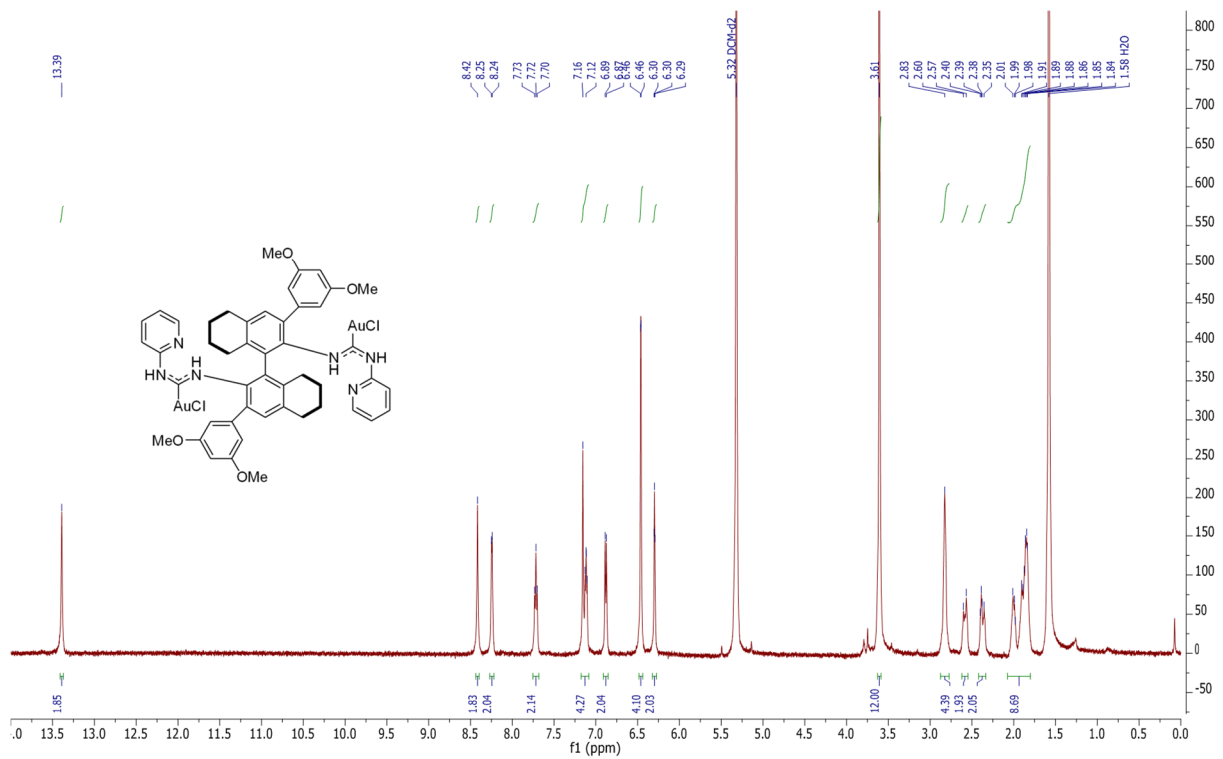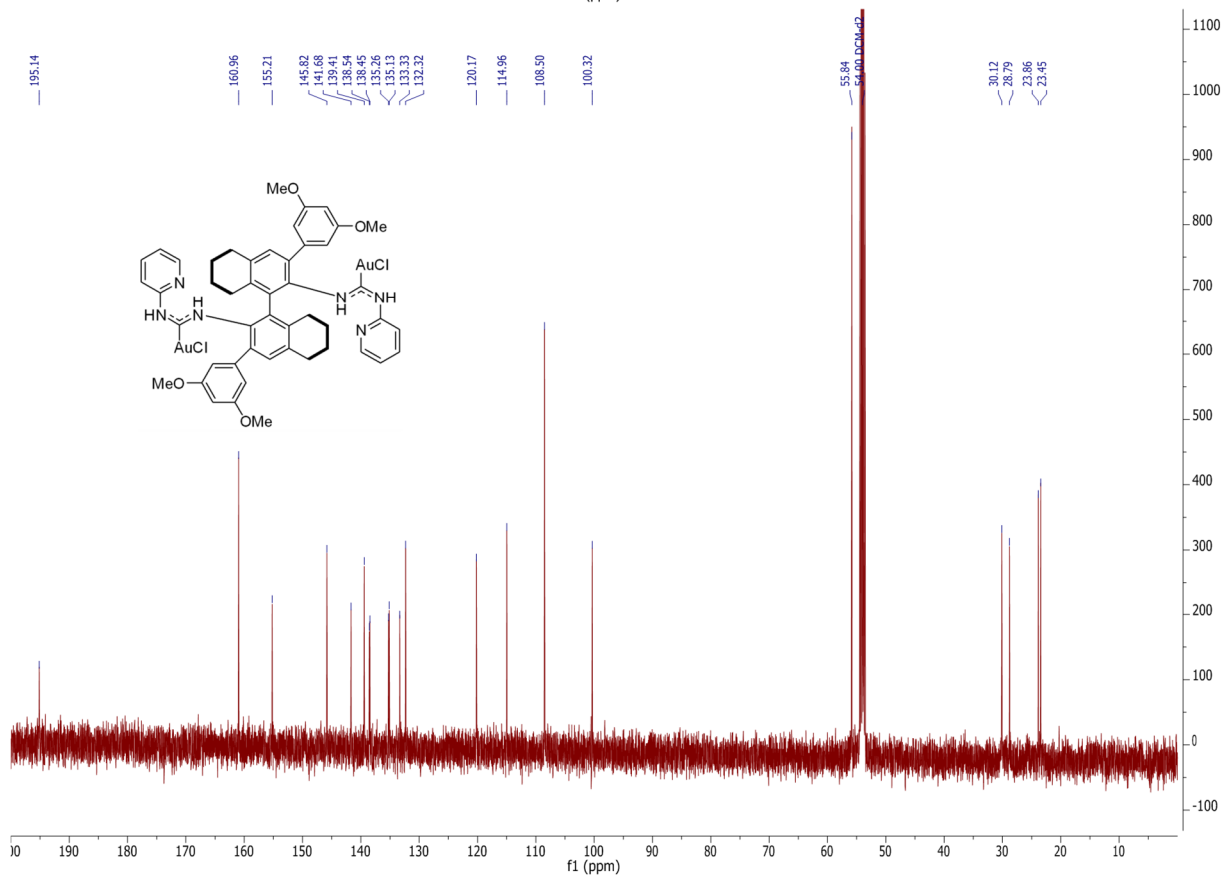





# Complex L6\*(AuCl)<sub>2</sub>

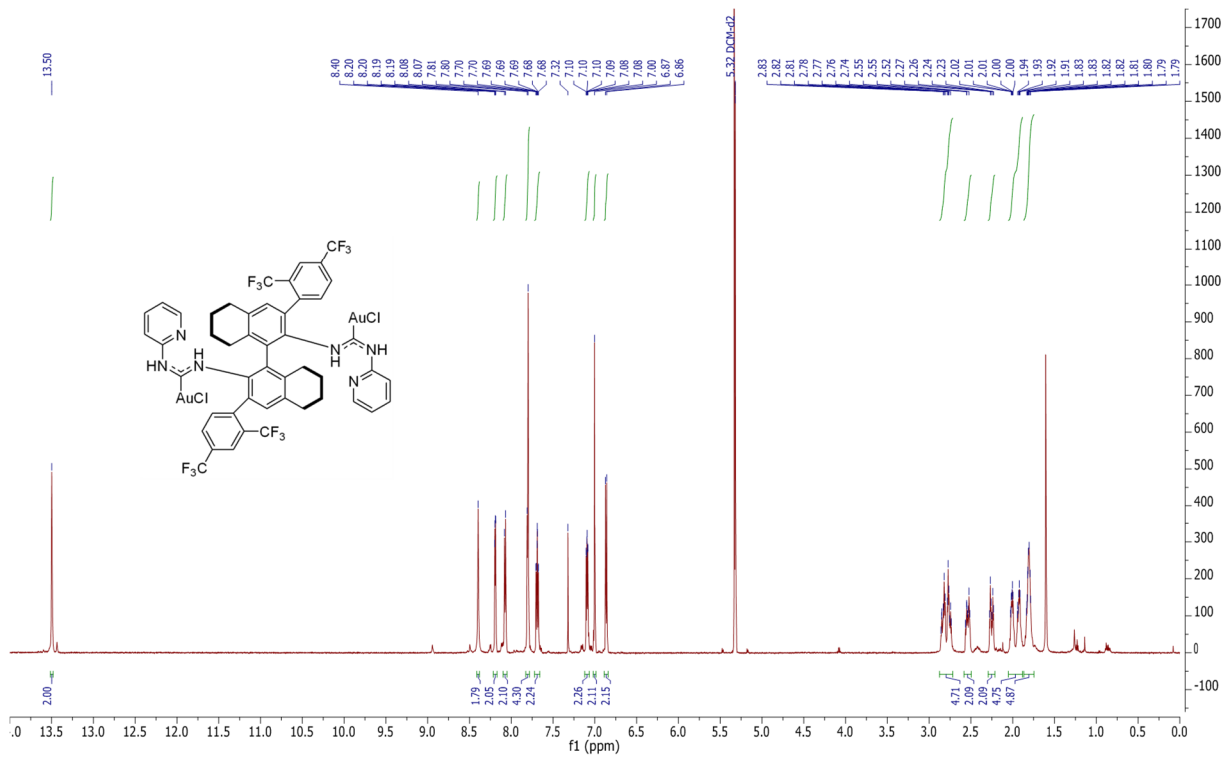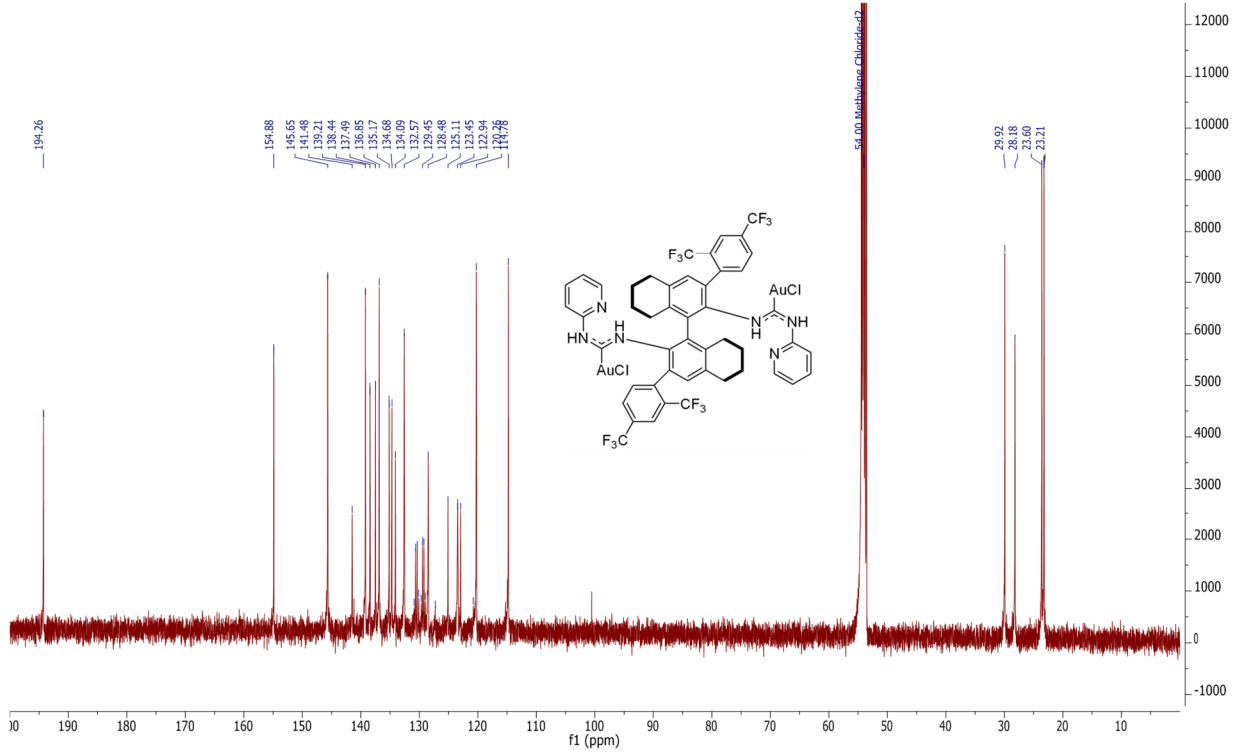

# Complex L7\*(AuCl)<sub>2</sub>

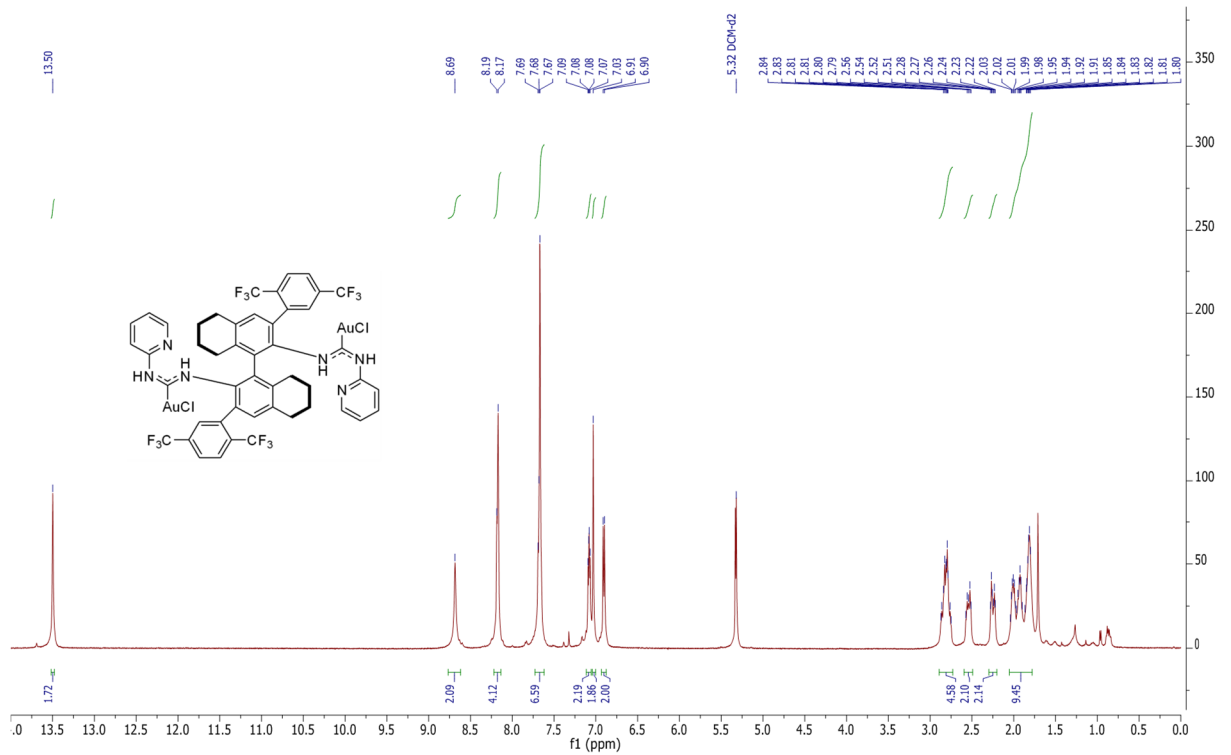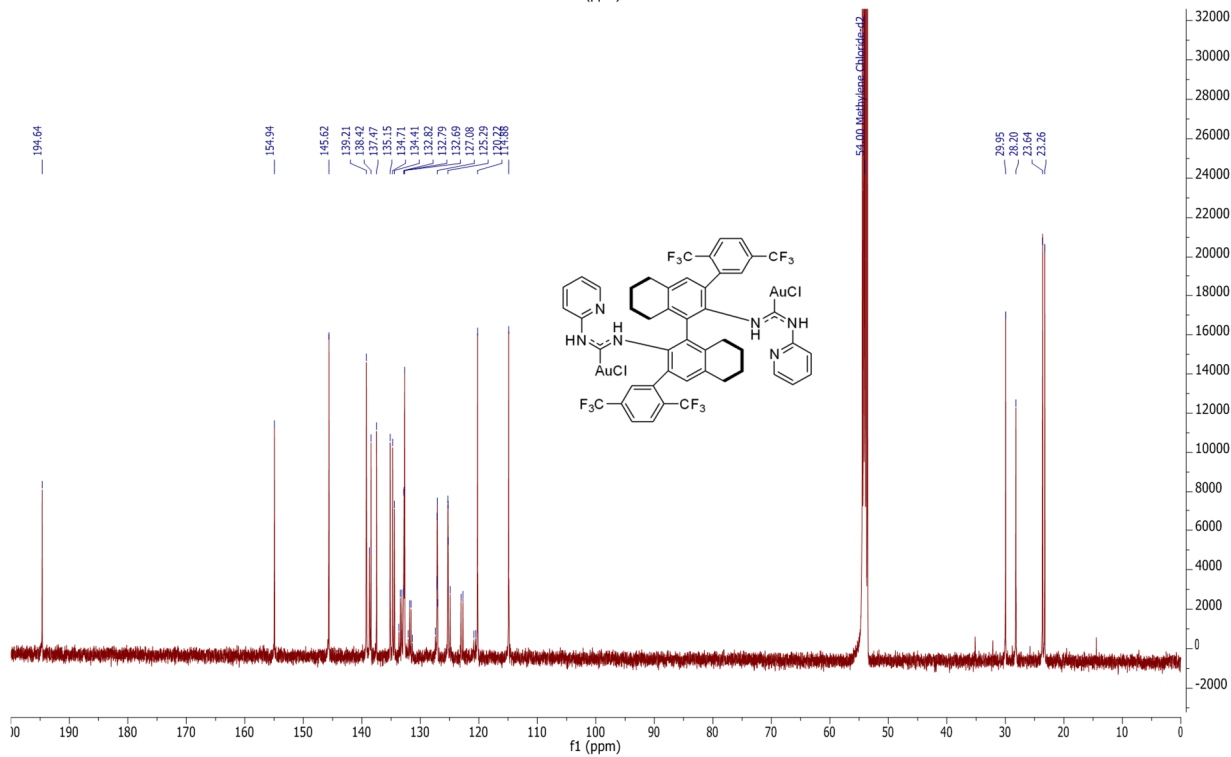

# Complex L8\*(AuCl)<sub>2</sub>

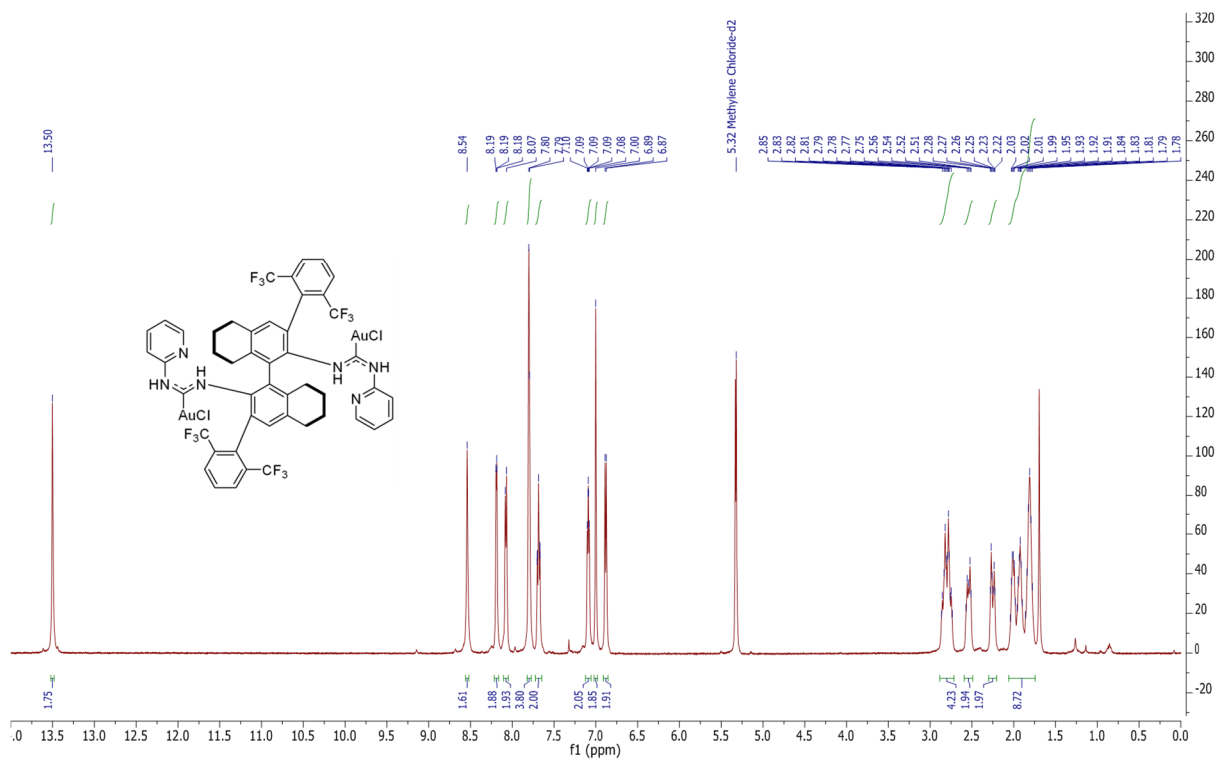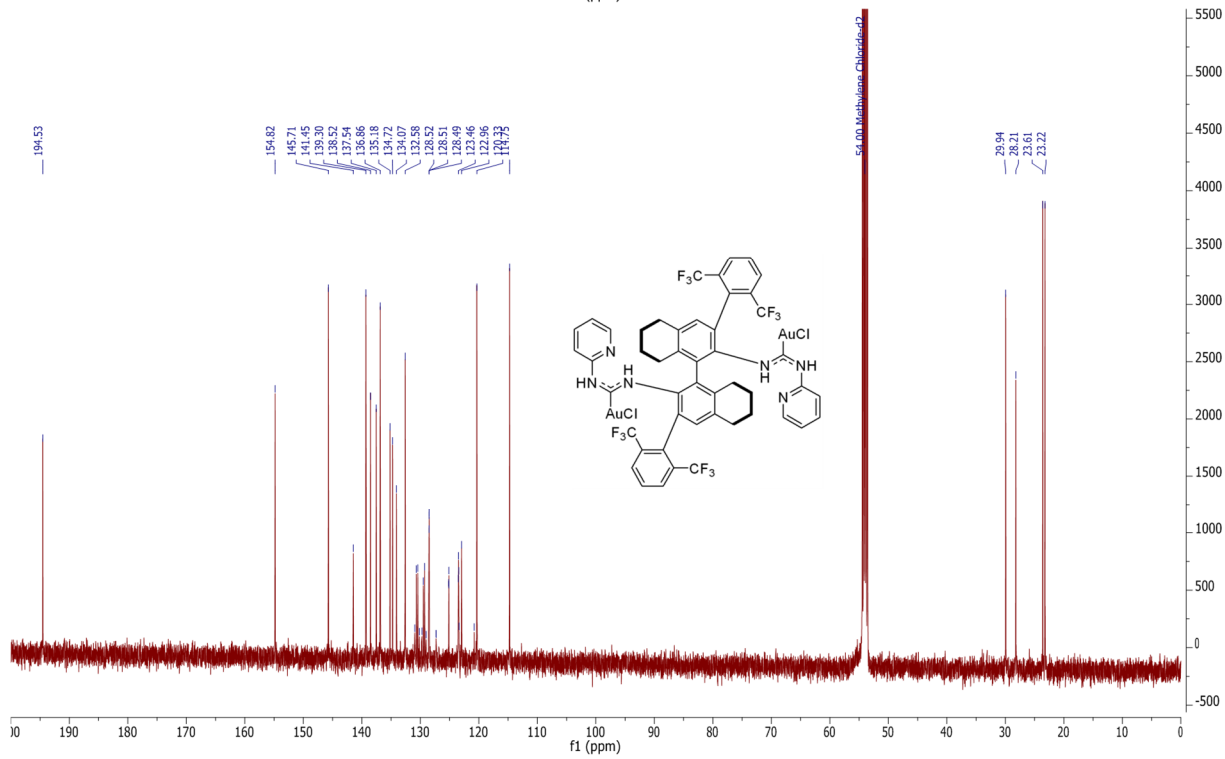

# Complex L9\*(AuCl)<sub>2</sub>

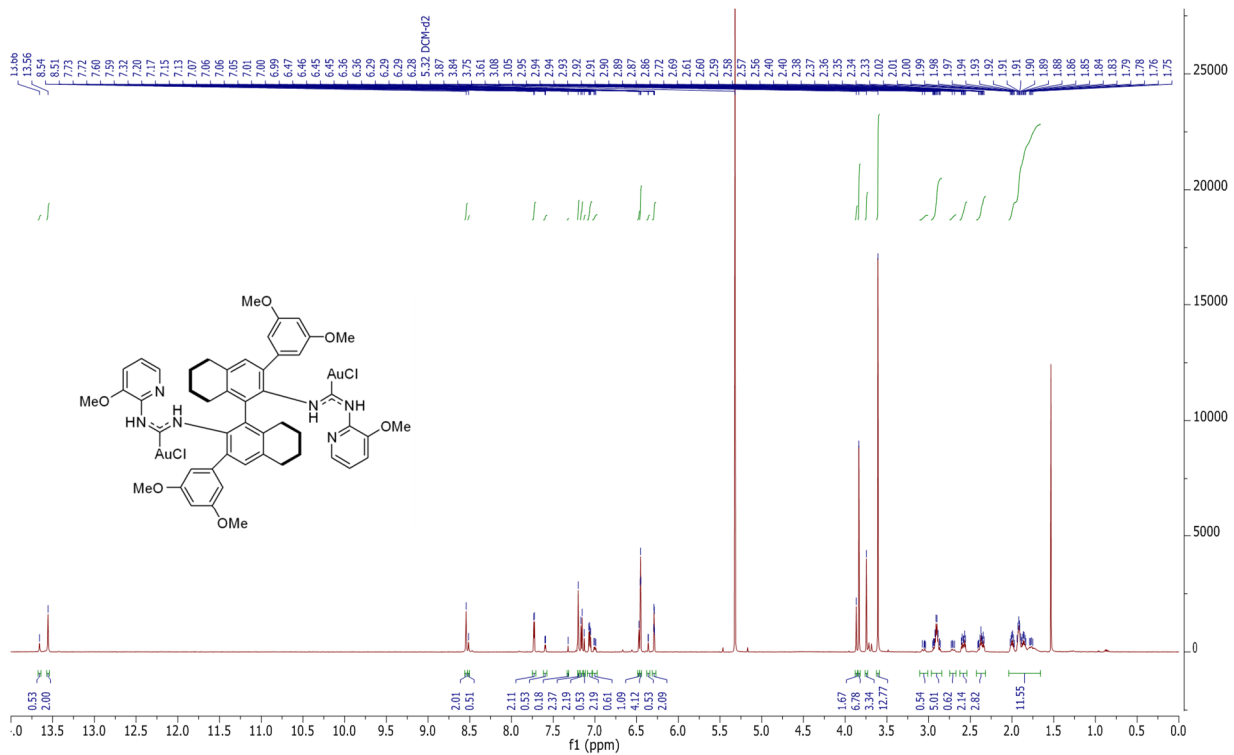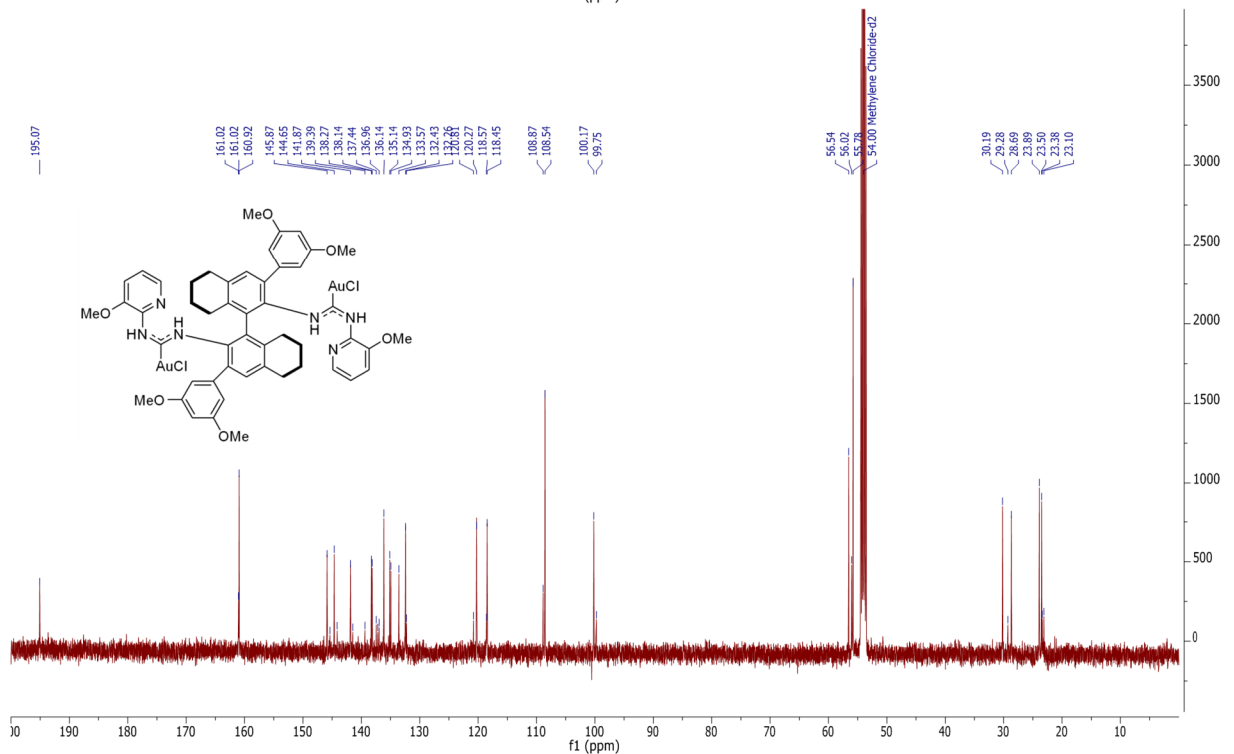

# Complex L10\*(AuCl)<sub>2</sub>

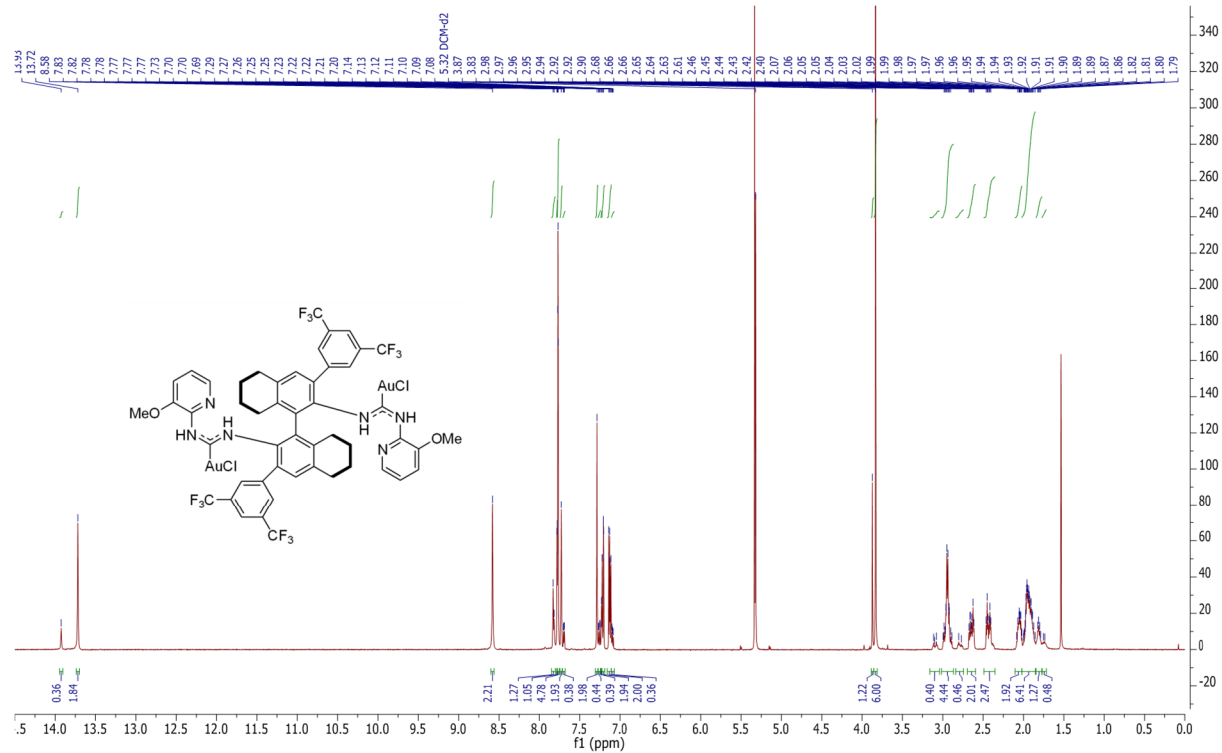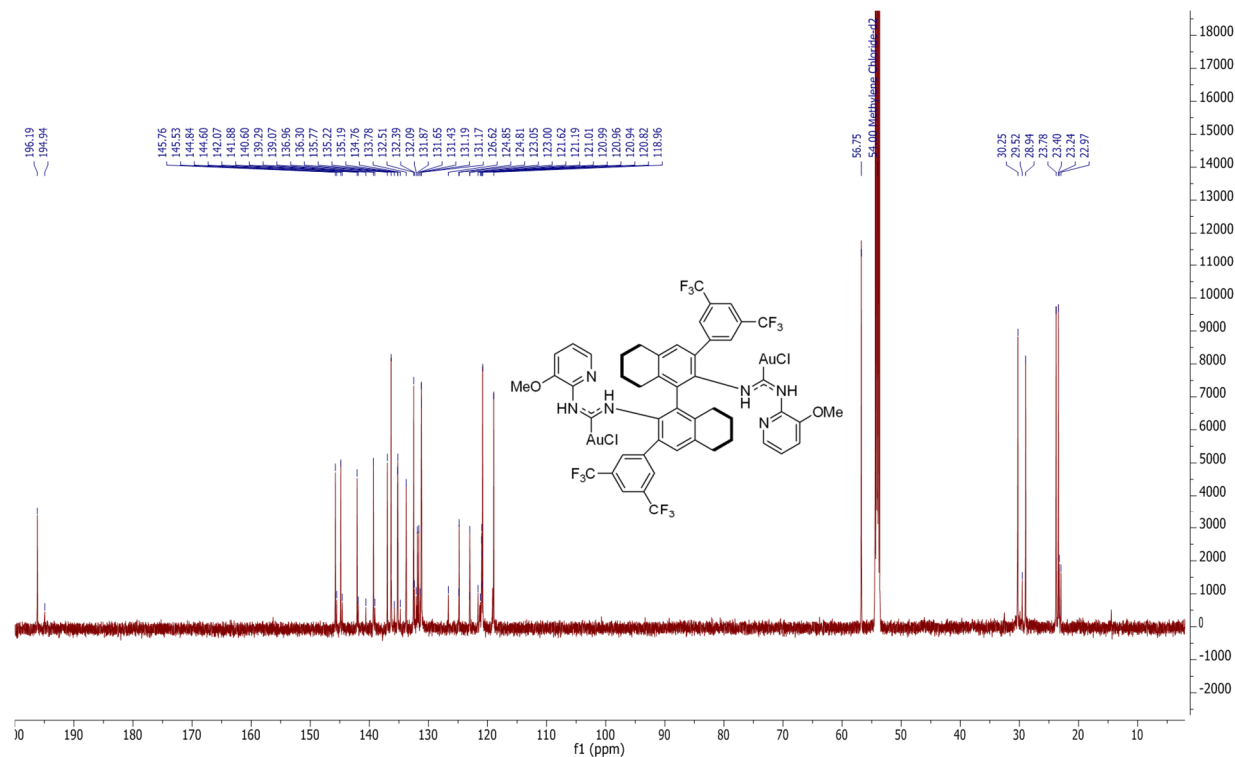

# Complex L11\*(AuCl)<sub>2</sub>

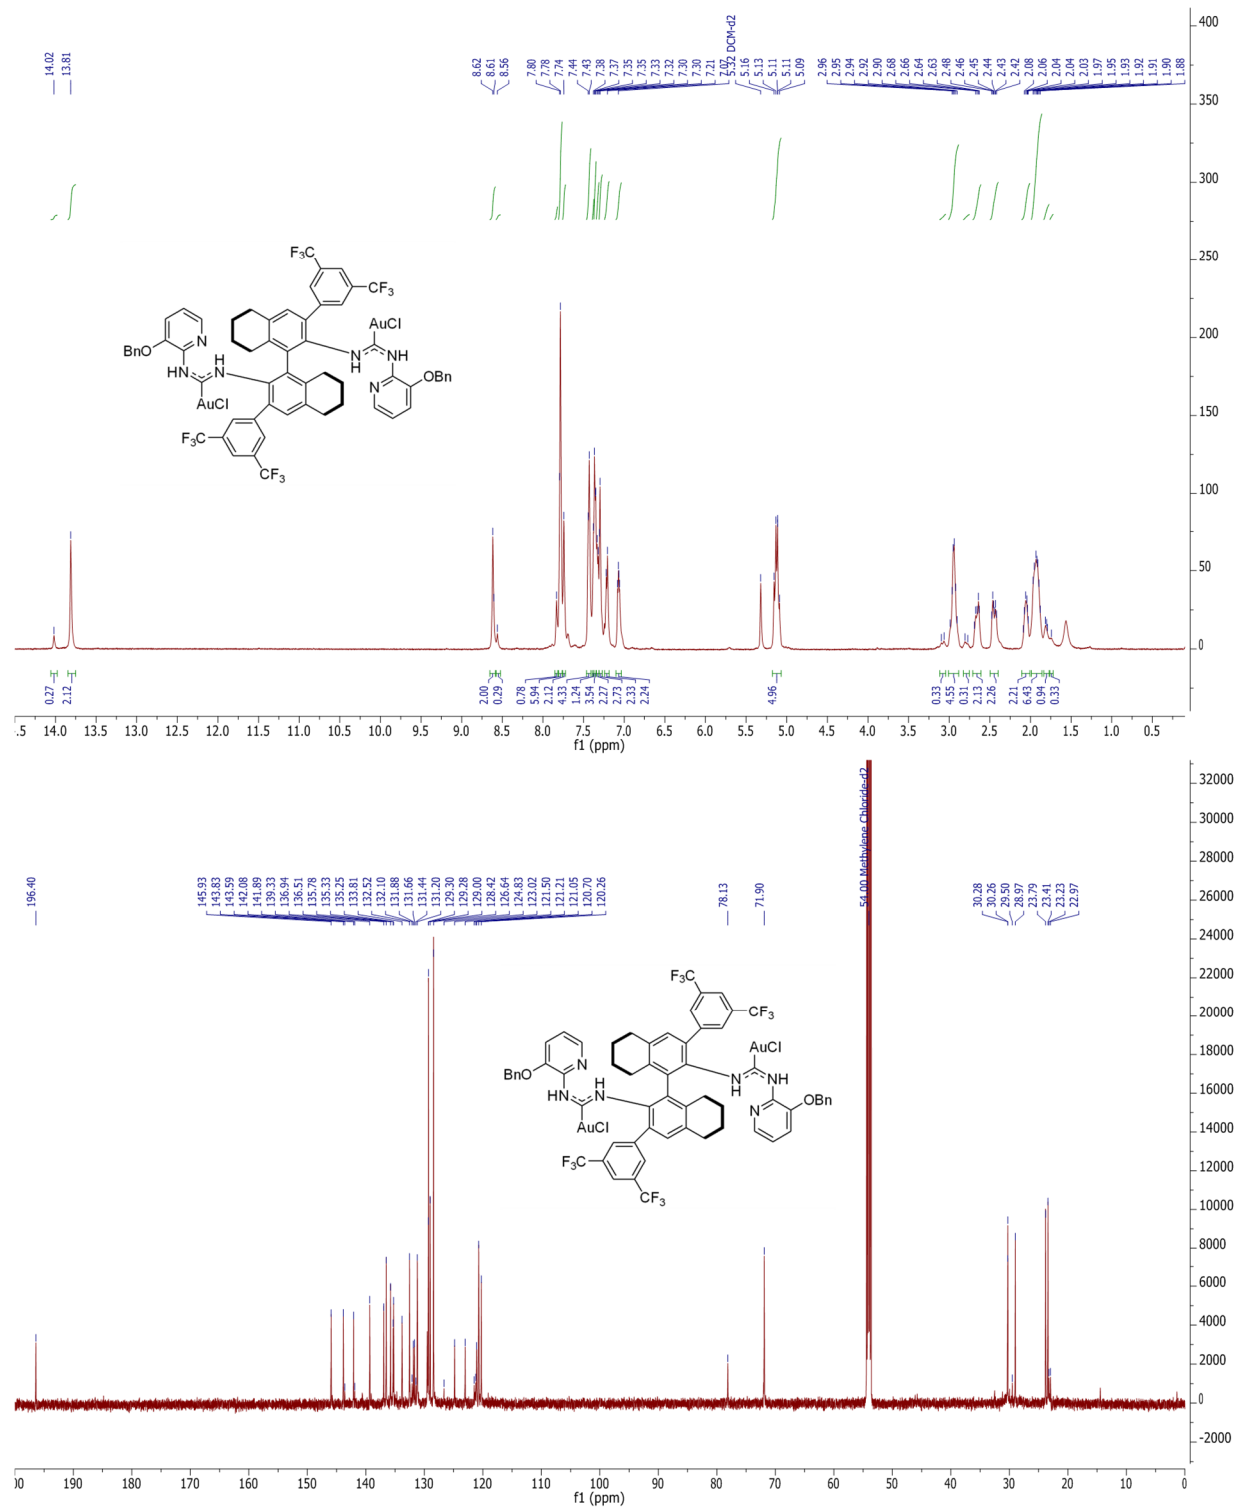

**Complex L12\*(AuCl)<sub>2</sub>**

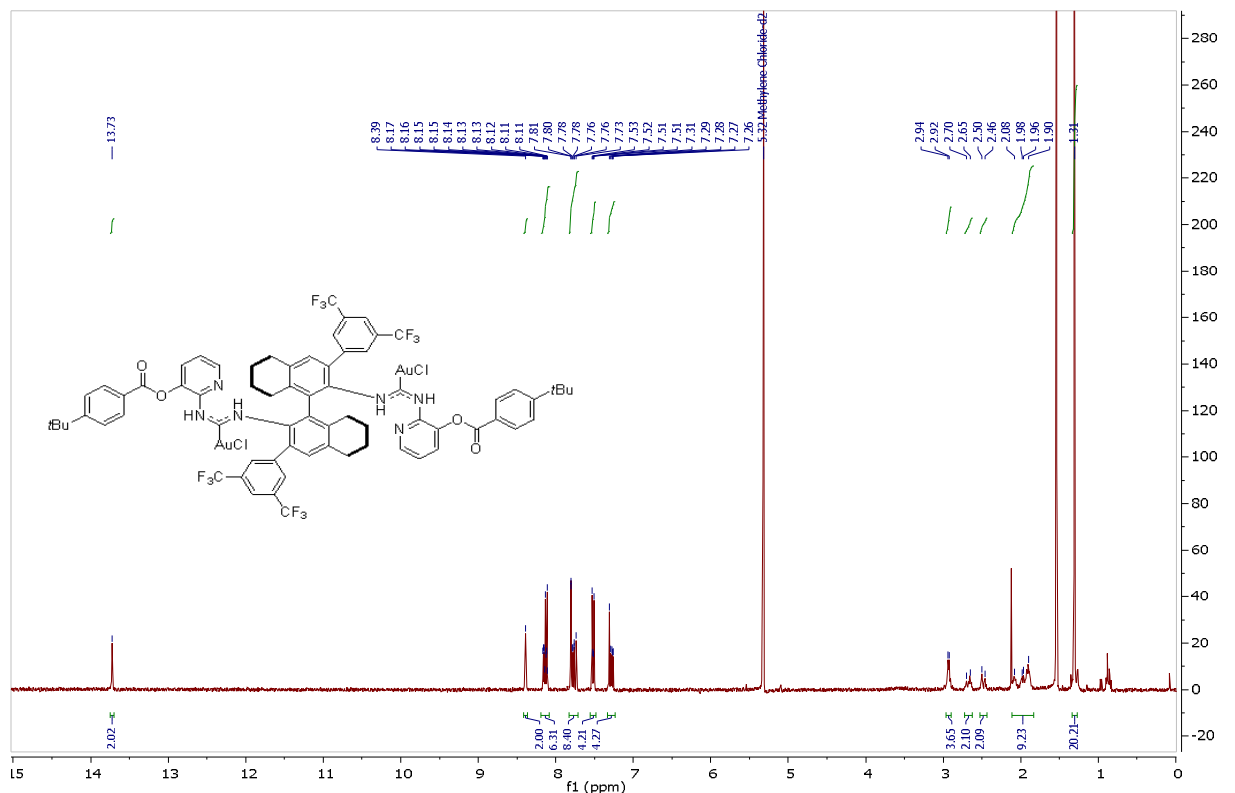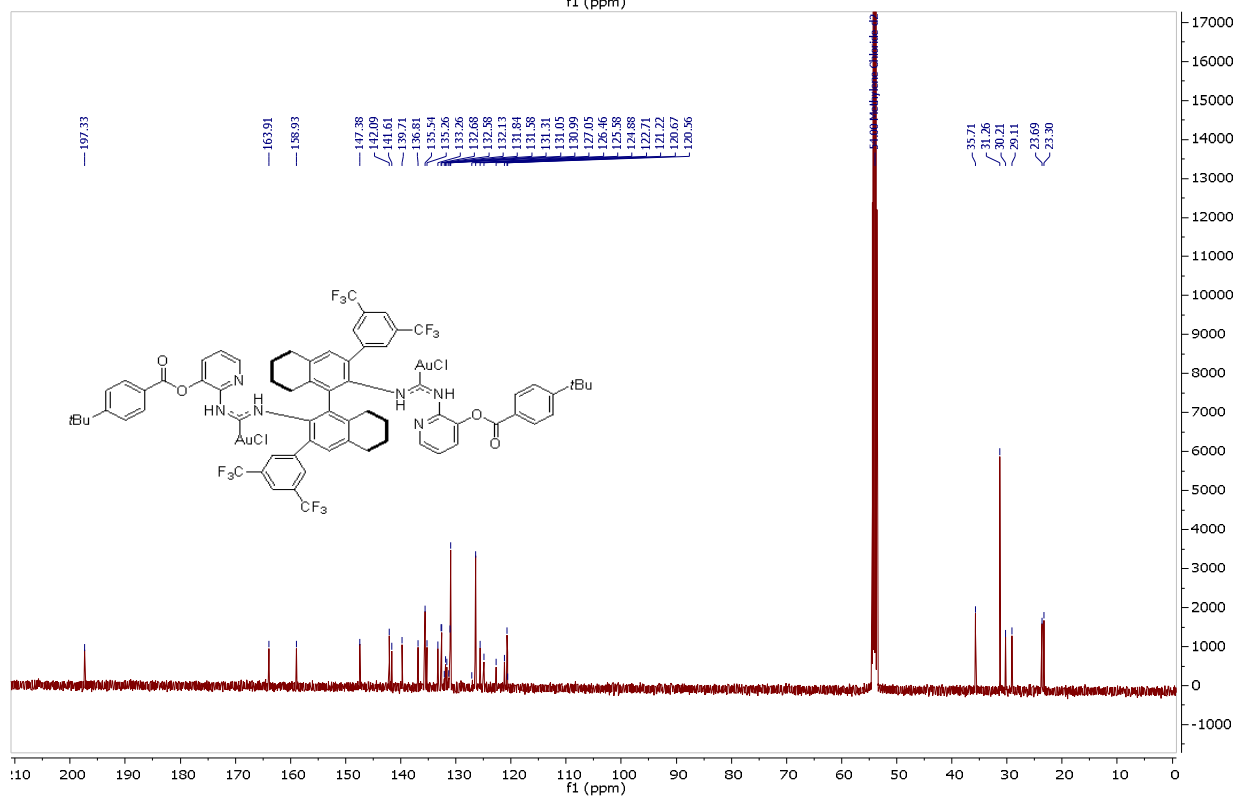



# Complex L13\*(AuCl)<sub>2</sub>

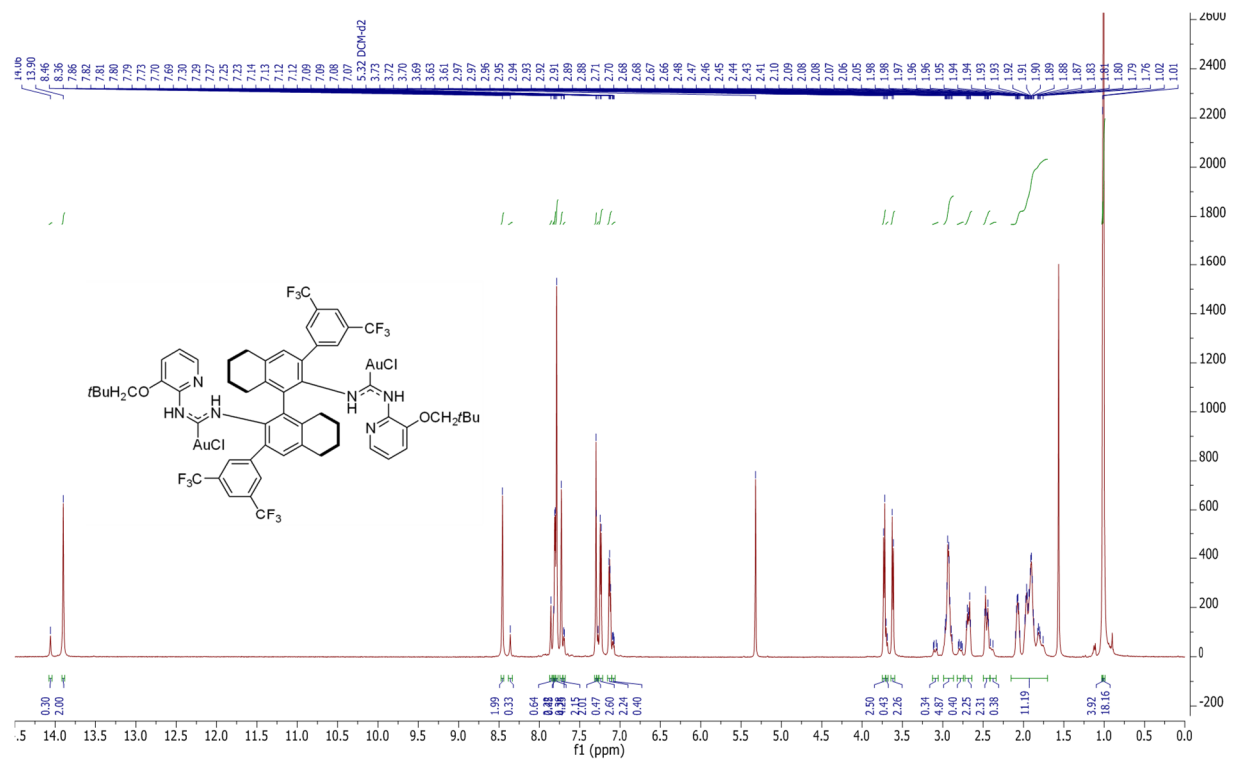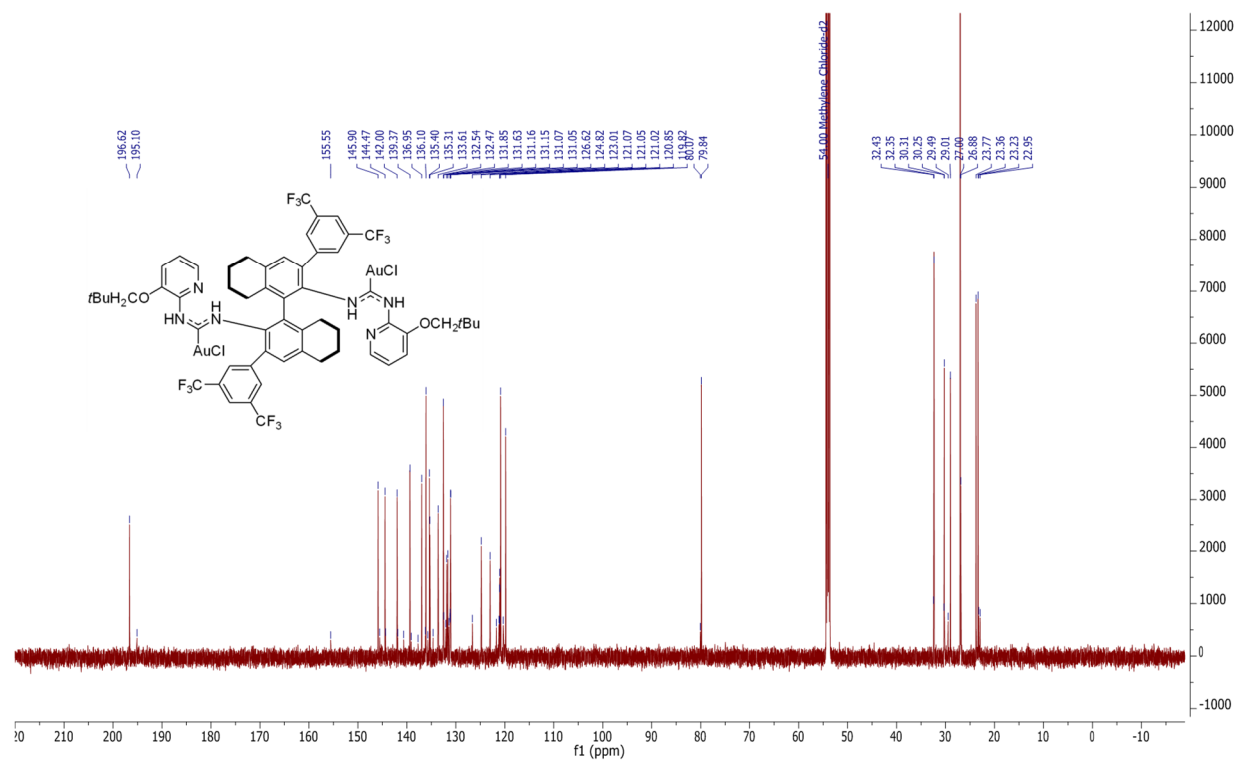

# Complex L14\*(AuCl)<sub>2</sub>

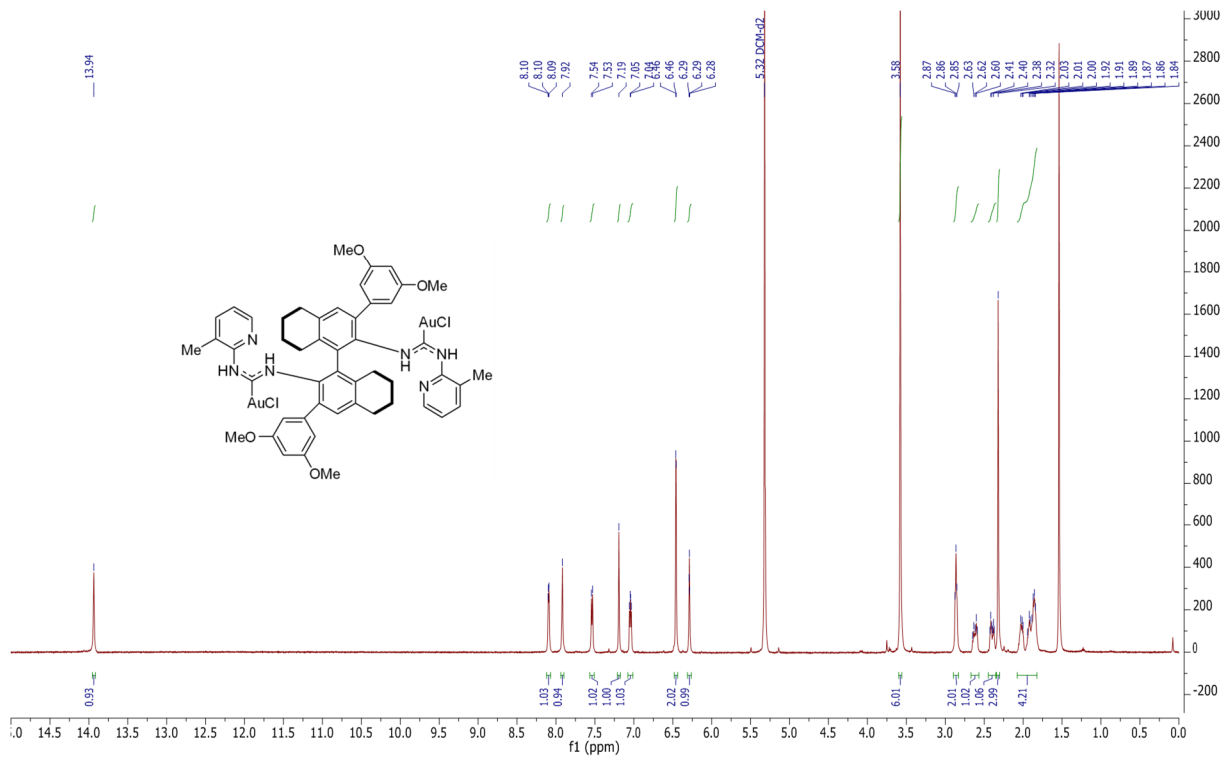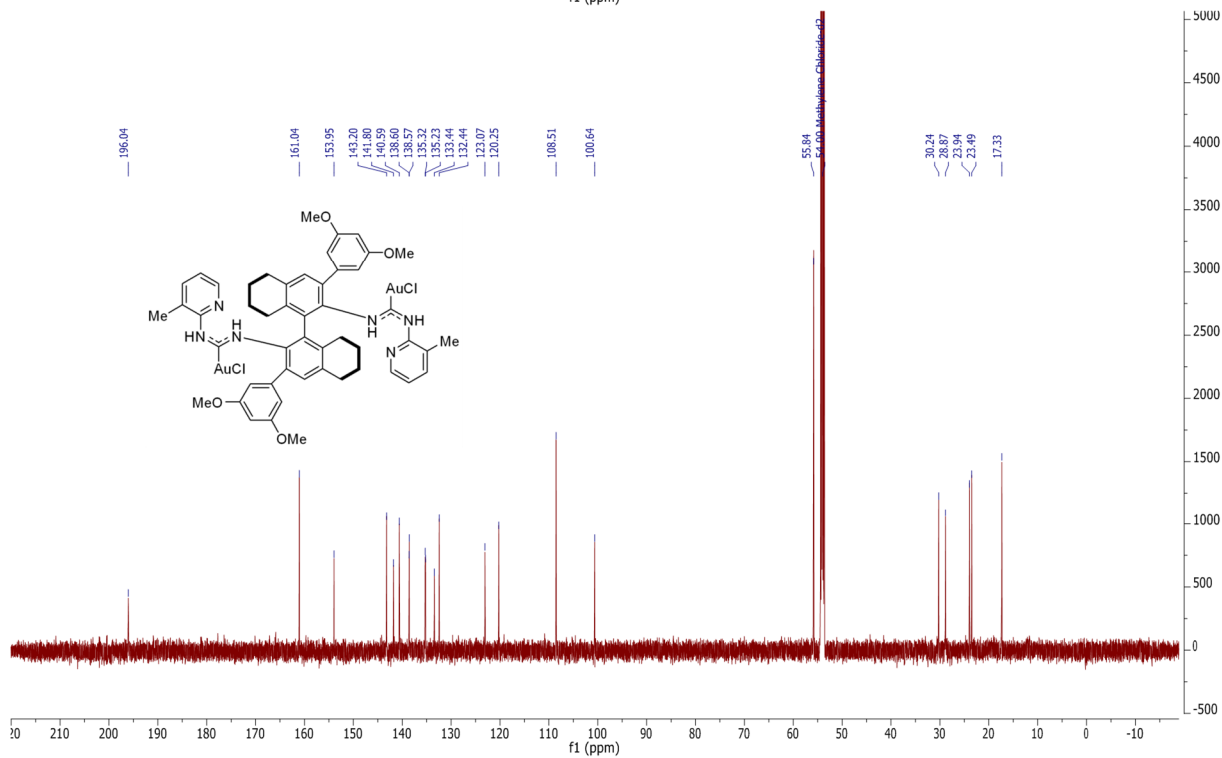

# Complex L15\*(AuCl)<sub>2</sub>

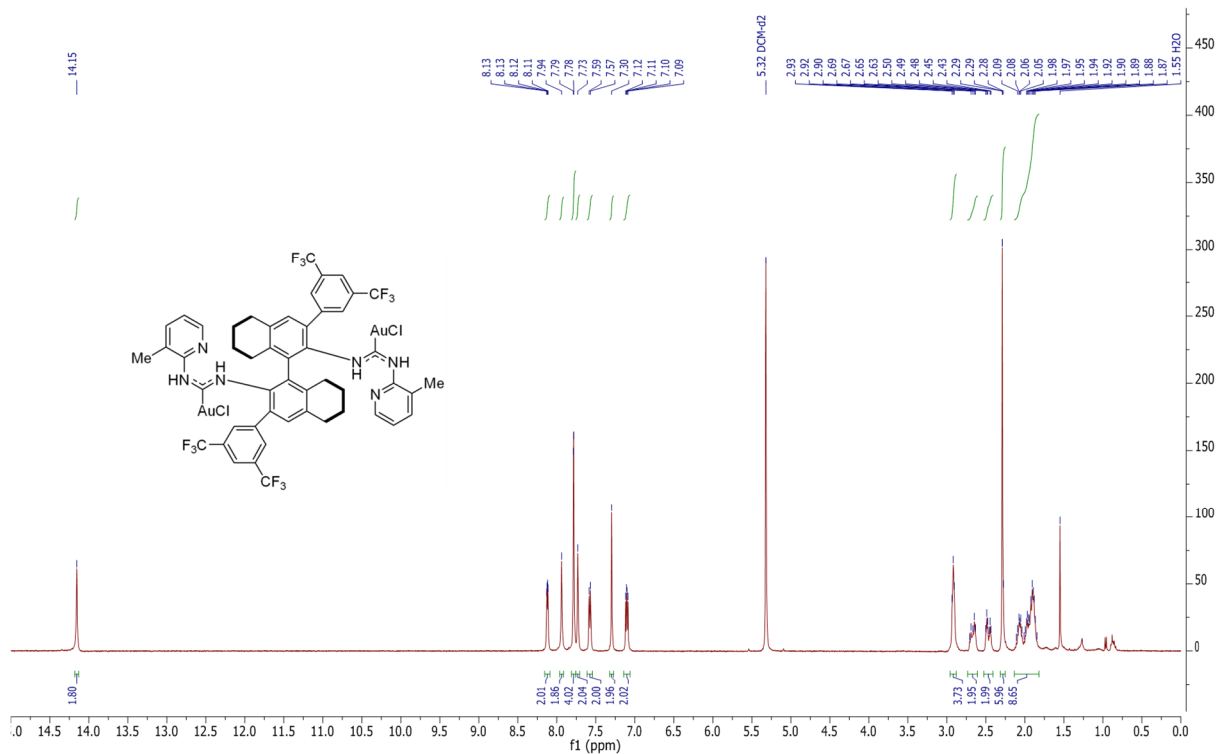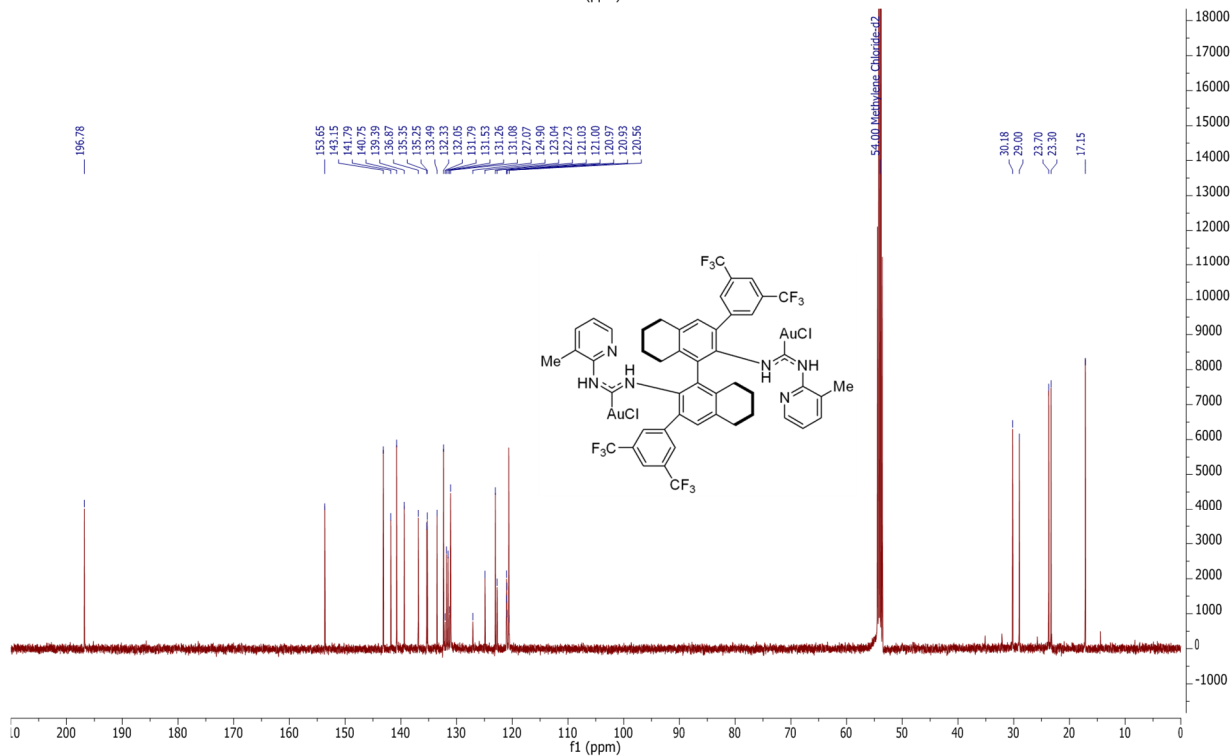

# Complex L16\*(AuCl)<sub>2</sub>

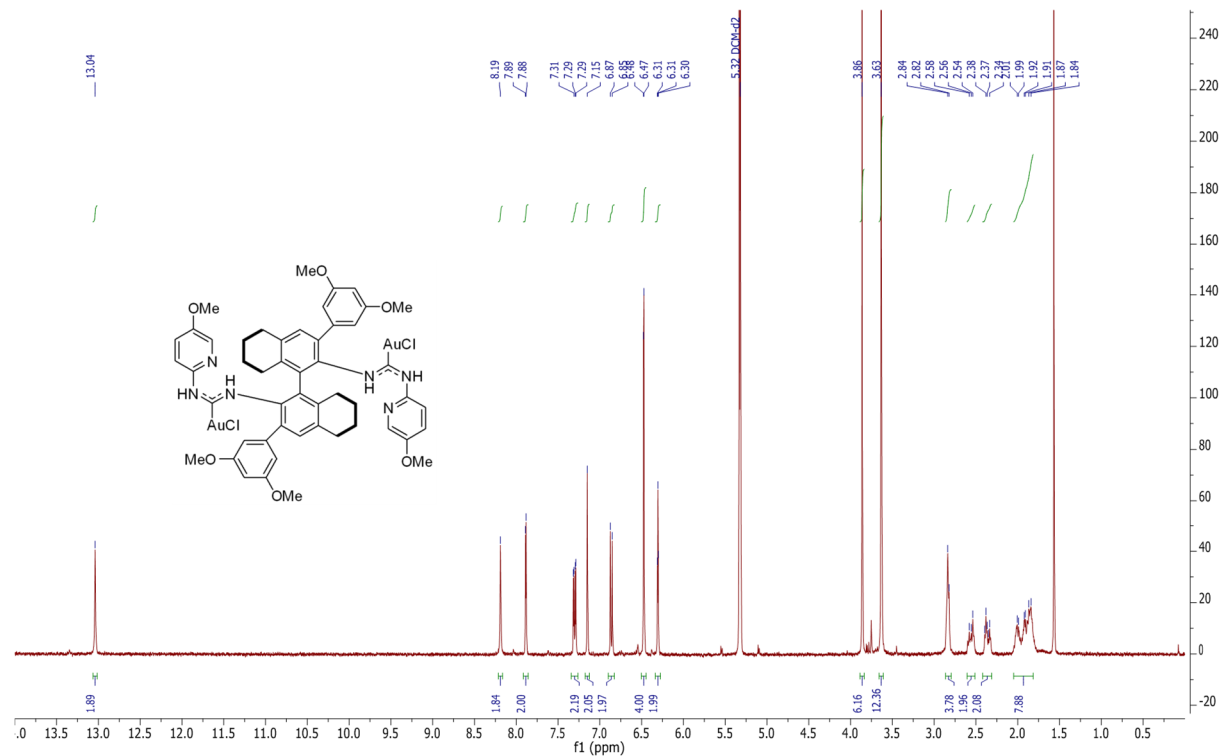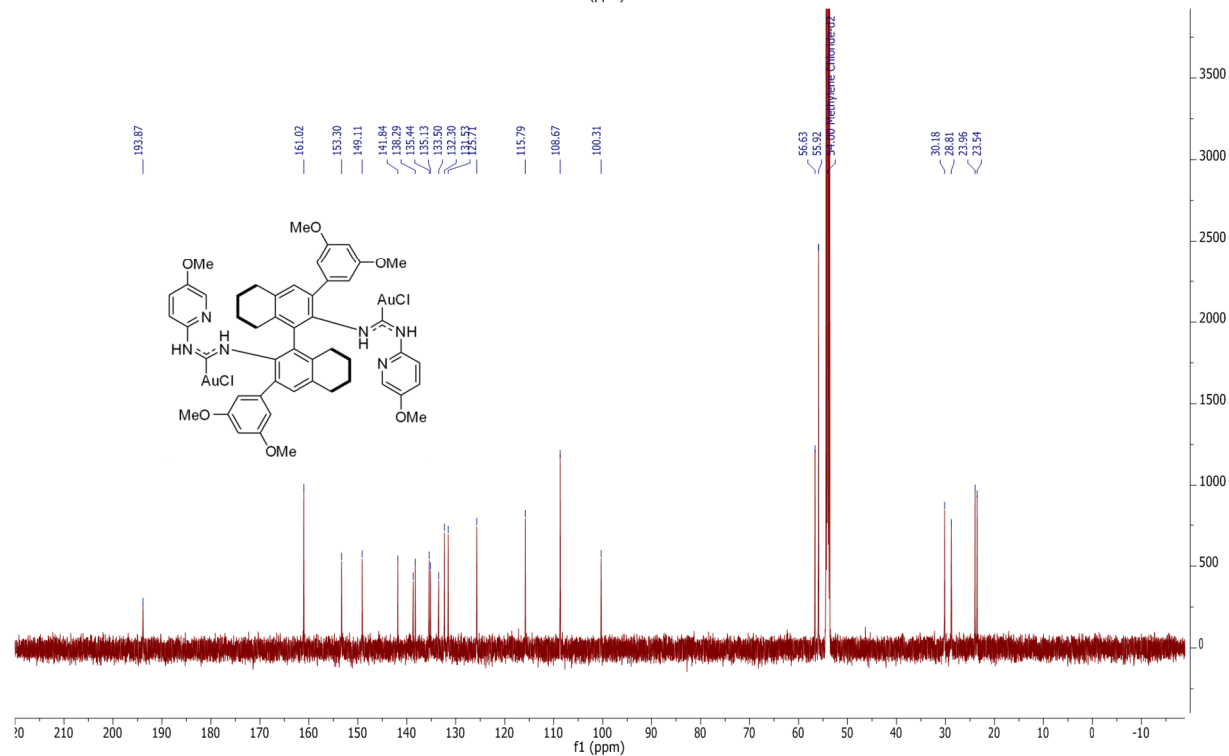

# Complex L17\*(AuCl)<sub>2</sub>

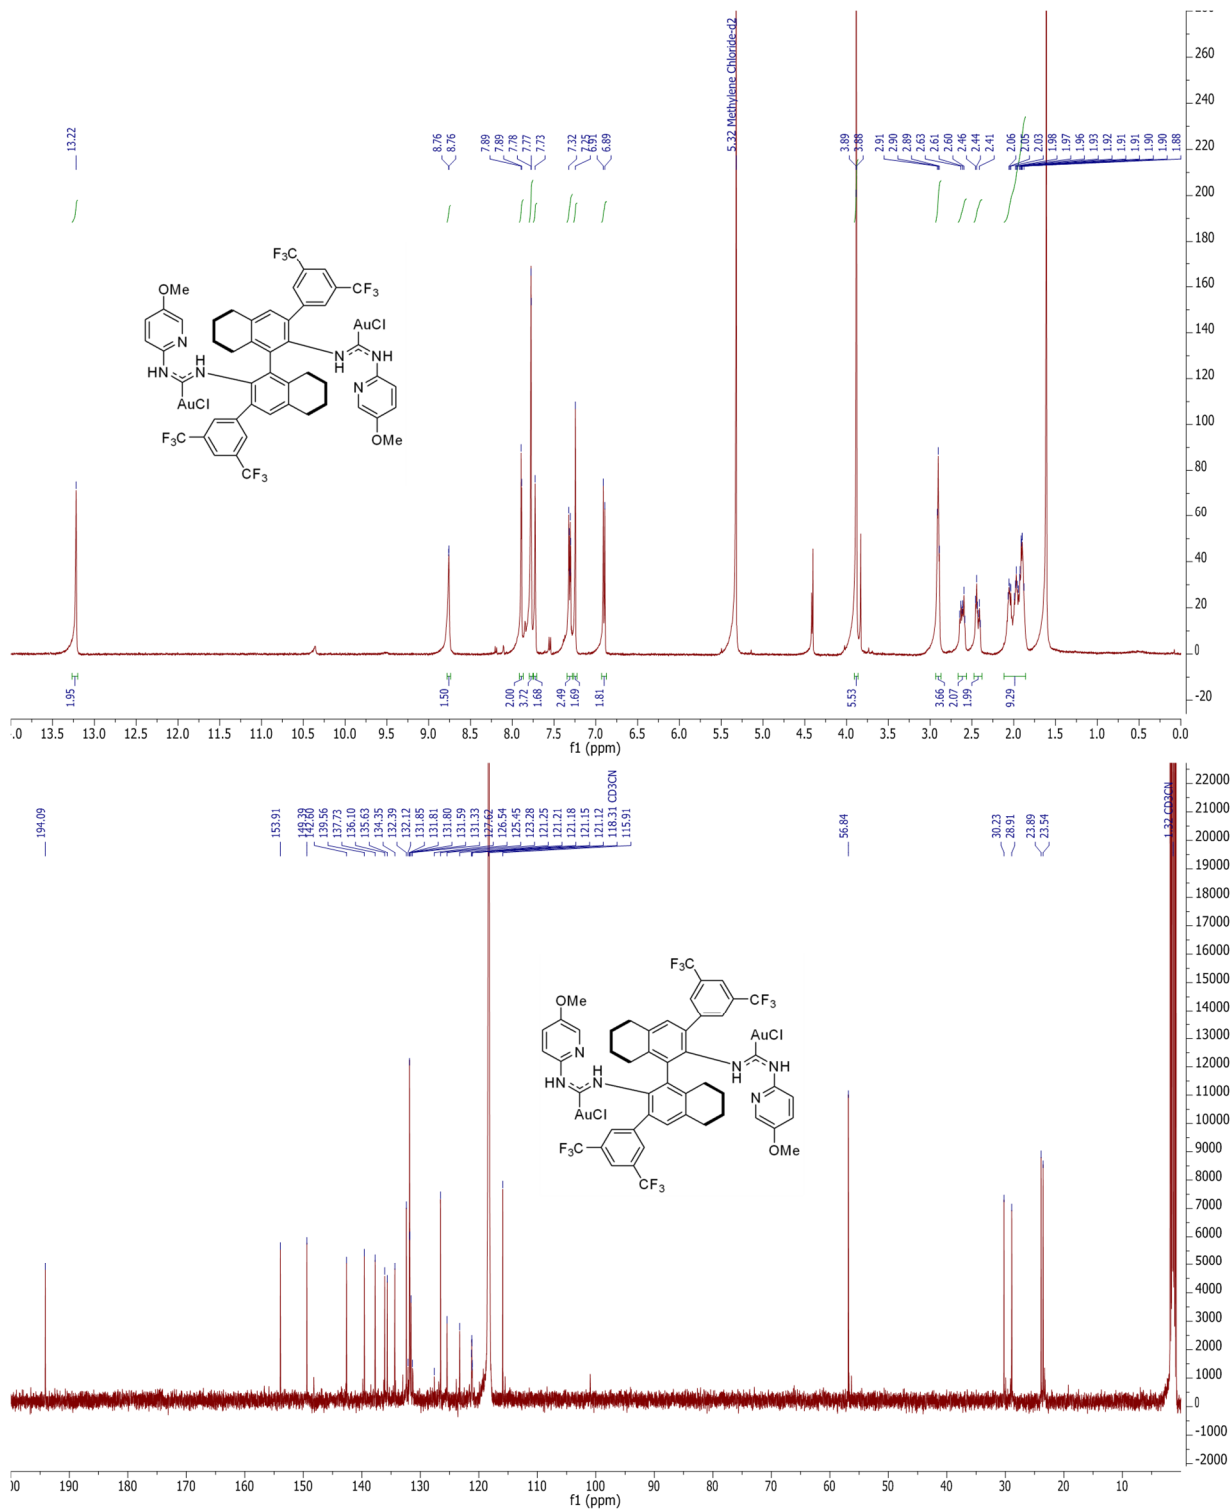

# Complex L18\*(AuCl)<sub>2</sub>

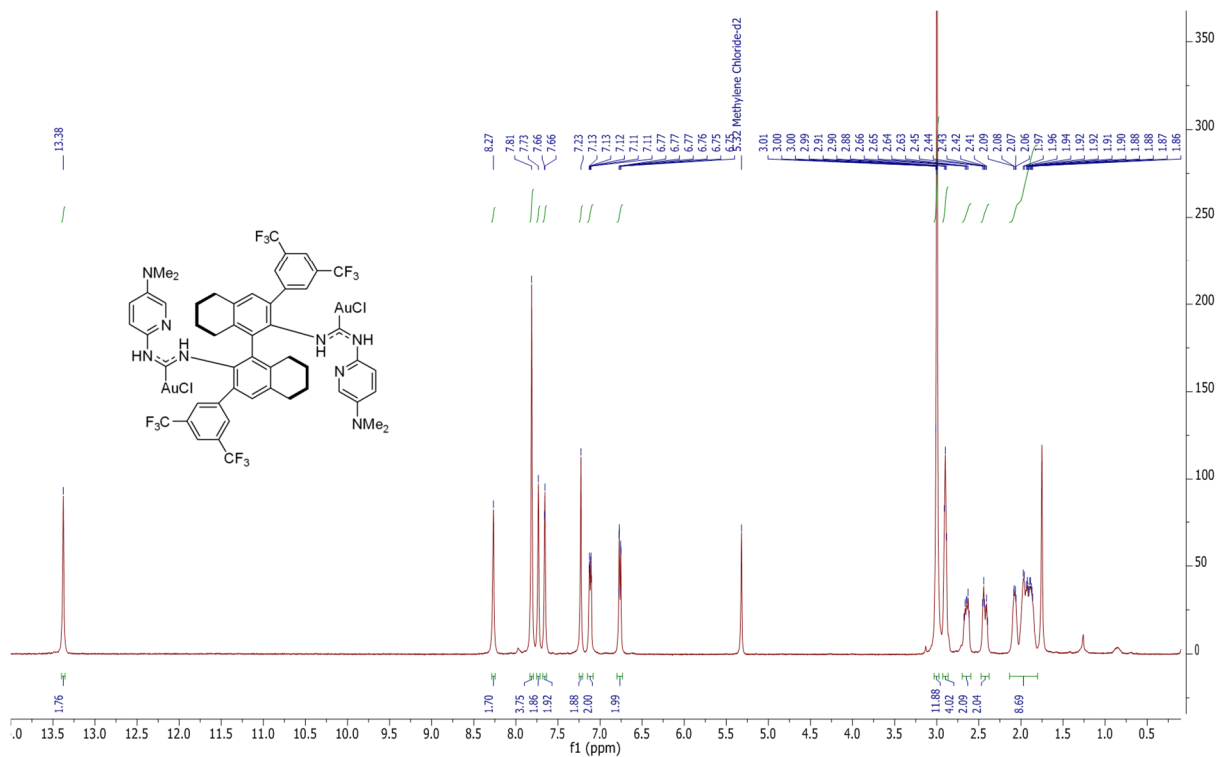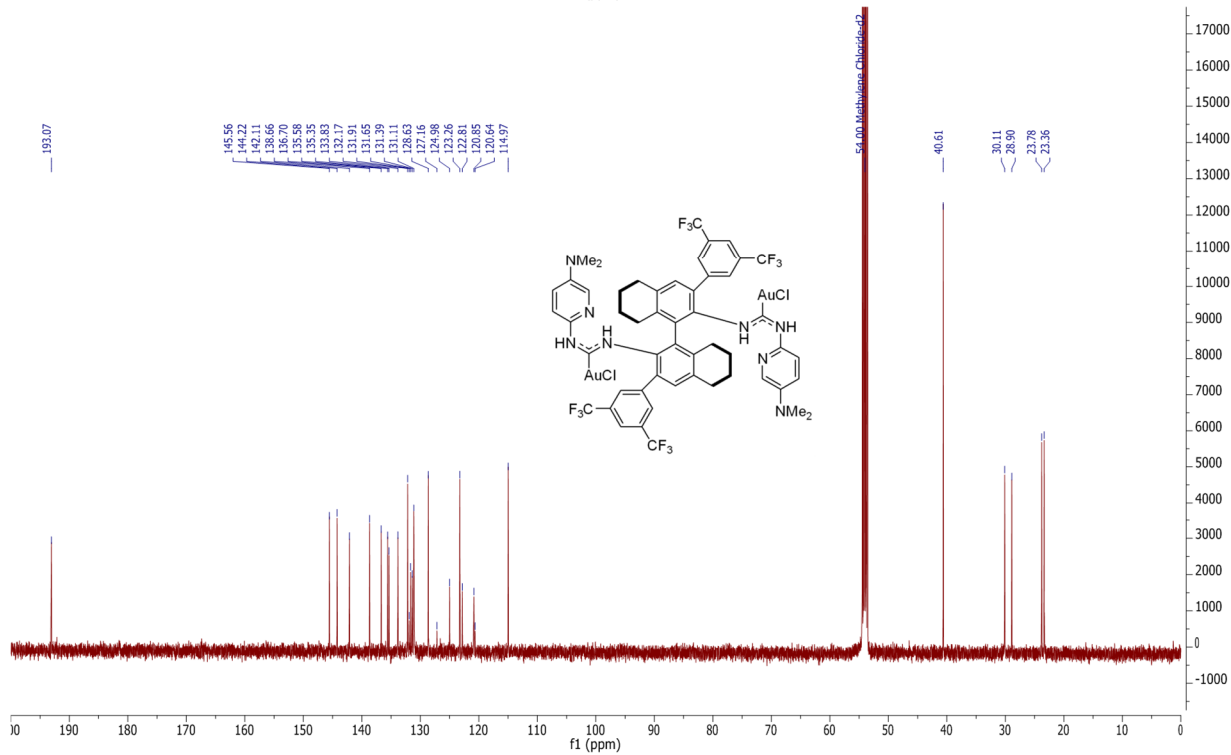



# Complex L20\*(AuCl)<sub>2</sub>

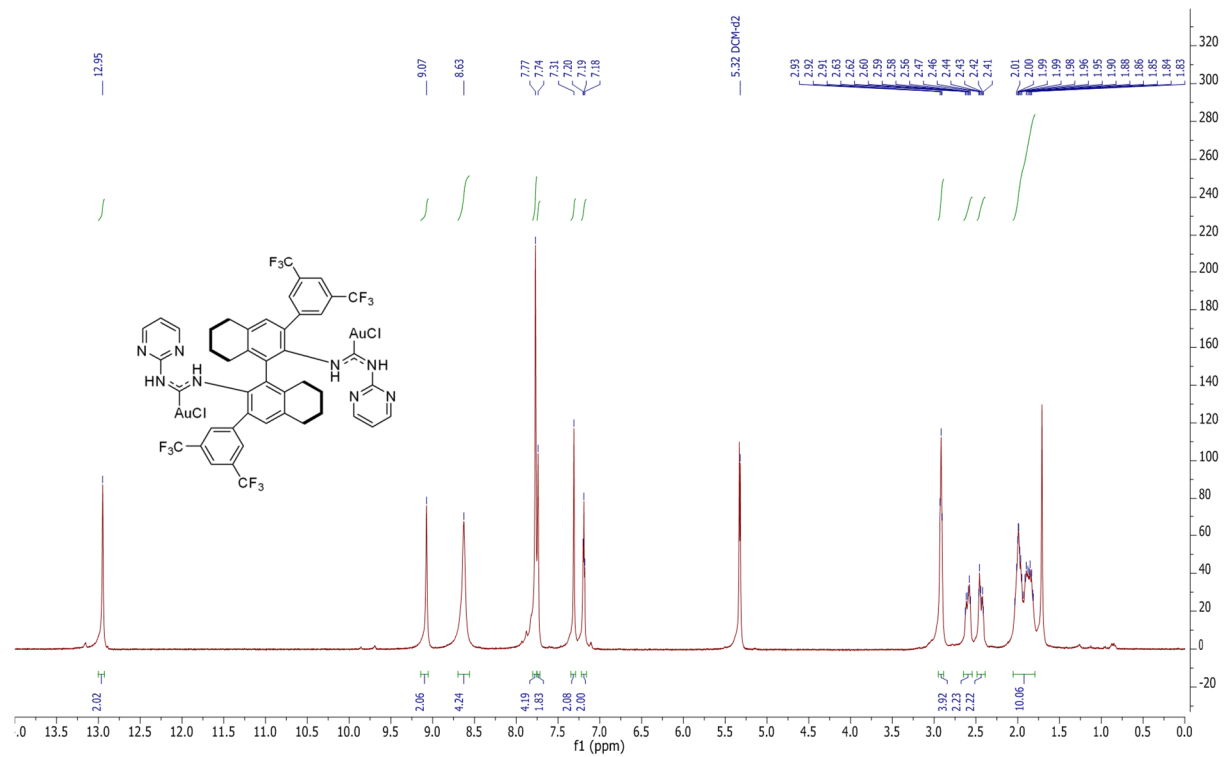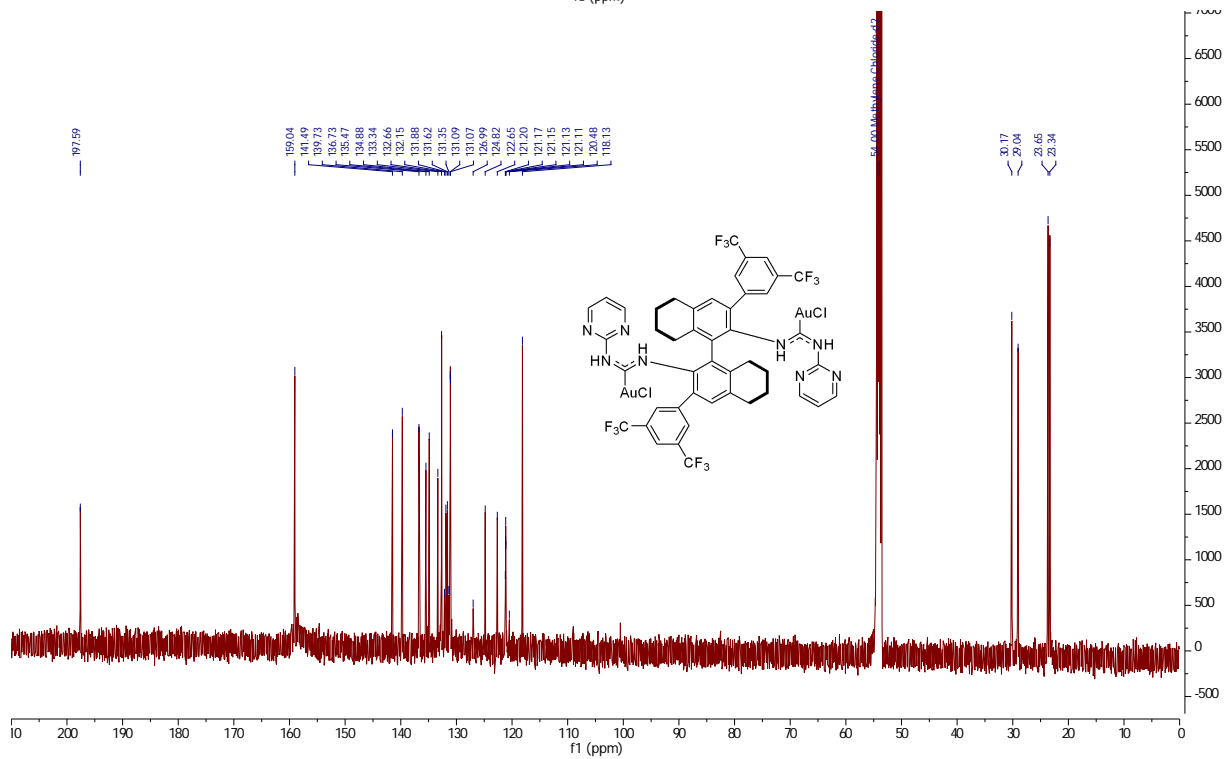



# Complex L21\*(AuCl)<sub>2</sub>

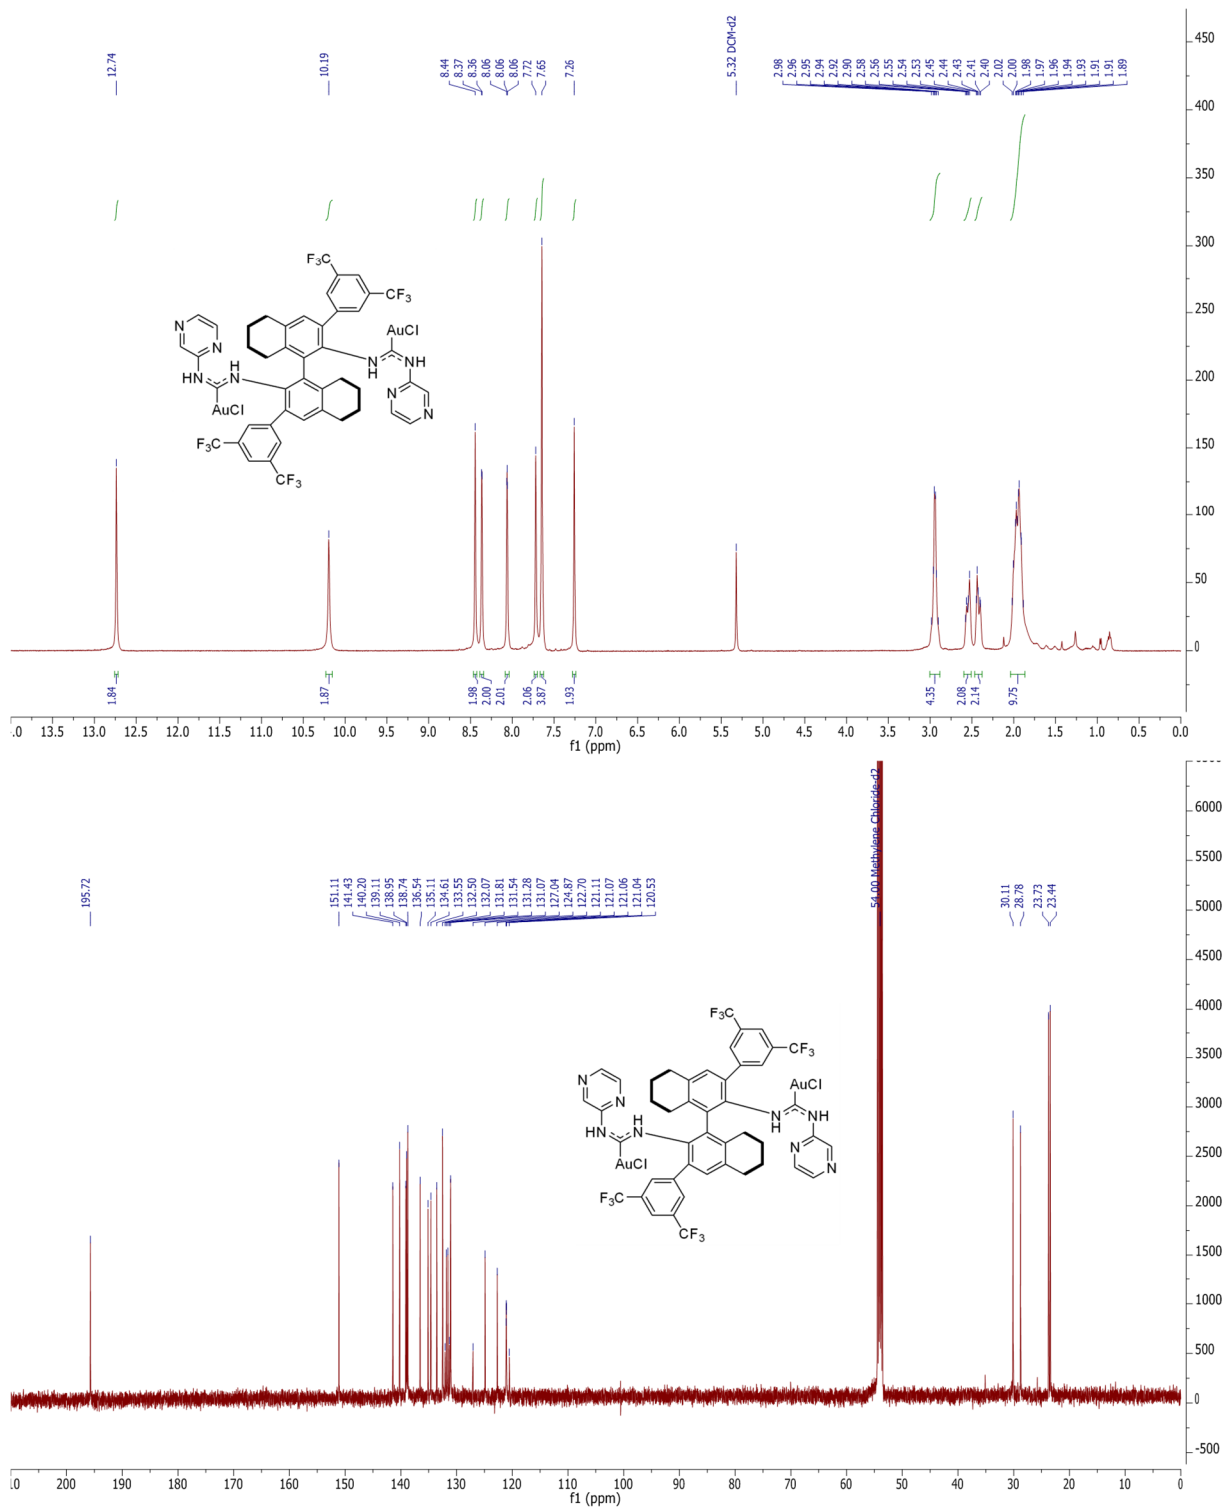

# Complex L22\*(AuCl)<sub>2</sub>

SPL1054H.1.fid  
 AVQ-400 QNP Proton starting parameters. 7/16/03. Revised 7/22/03 RN

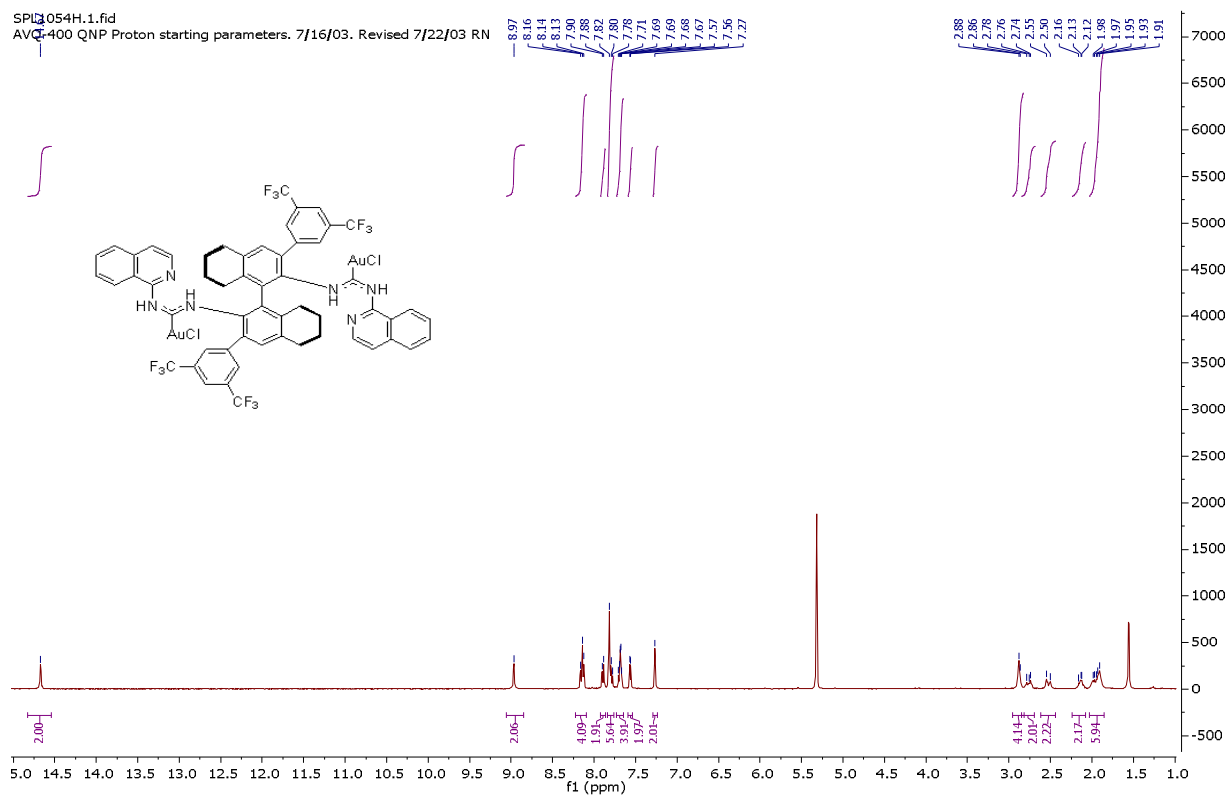

SPL1054CCC.1.fid  
 DRX-500 5mm Z80 probe 13C starting parameters. REV 12/12/00  
 With GPD proton decoupling. Use ns\*td0 scans  
 TBIC 103013

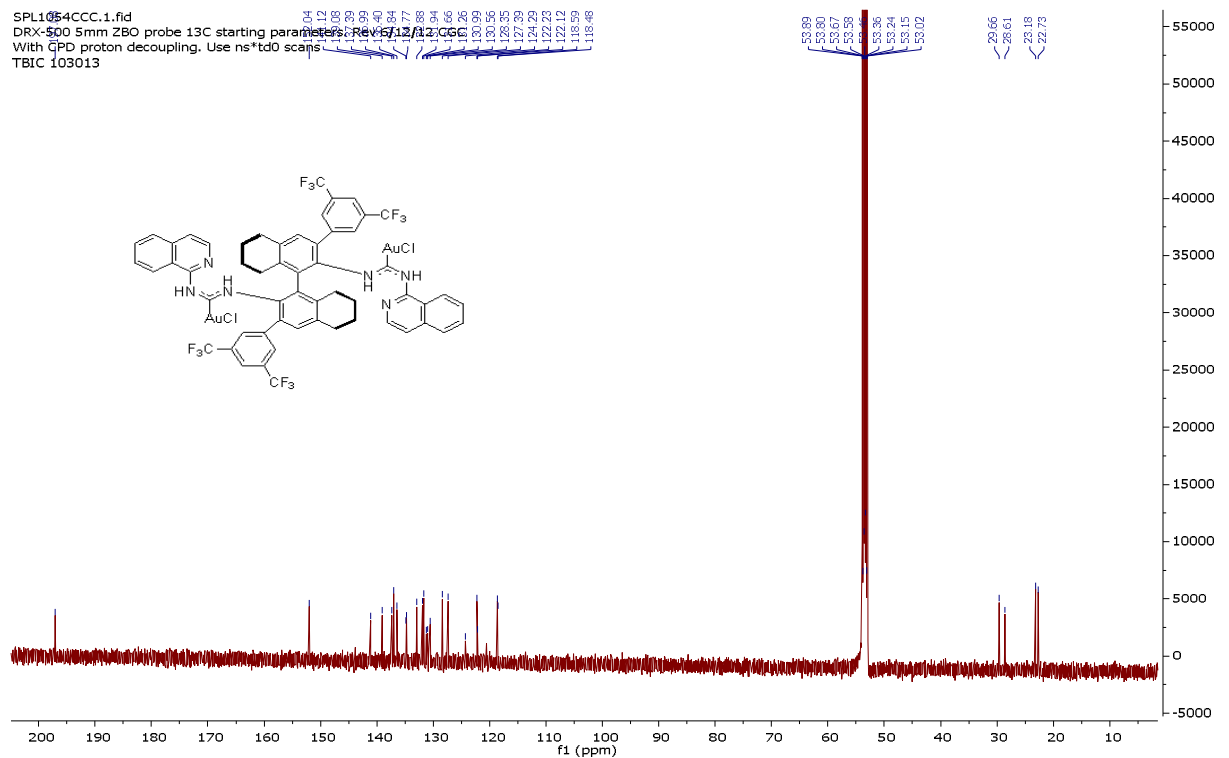

# Complex L23\*(AuCl)<sub>2</sub>

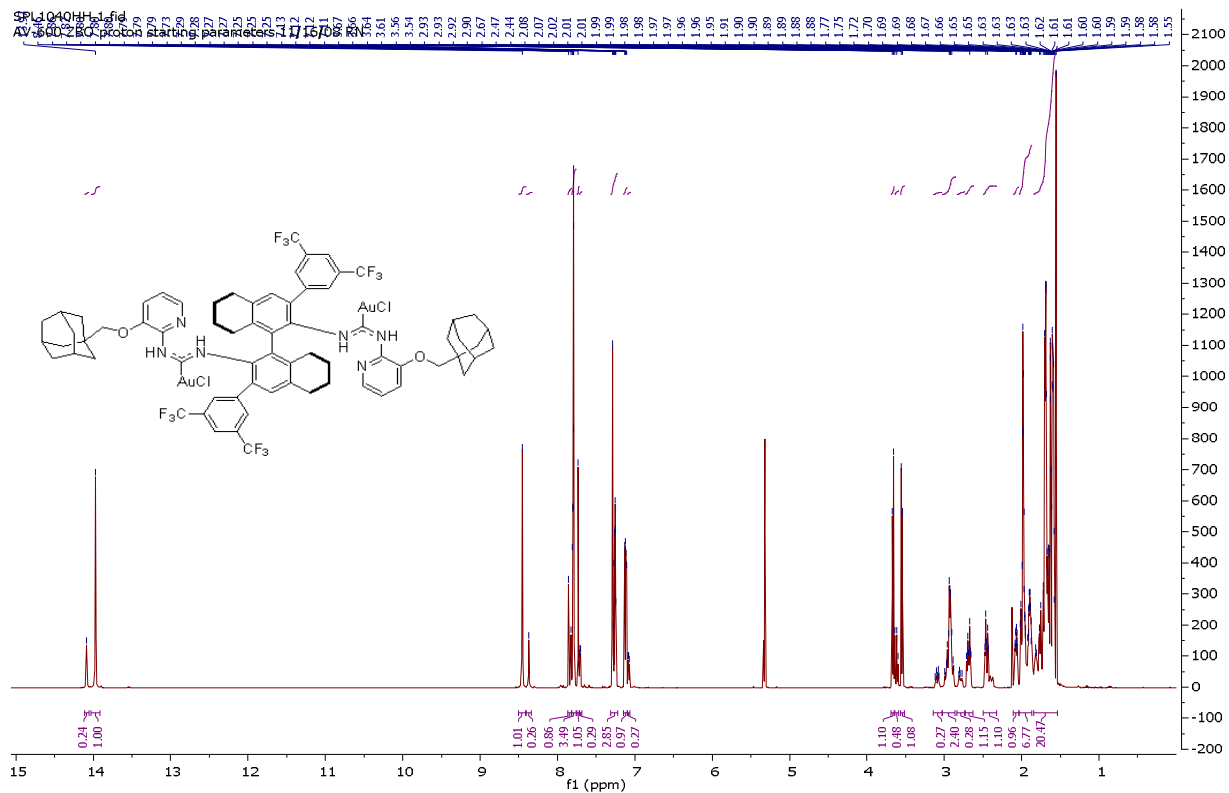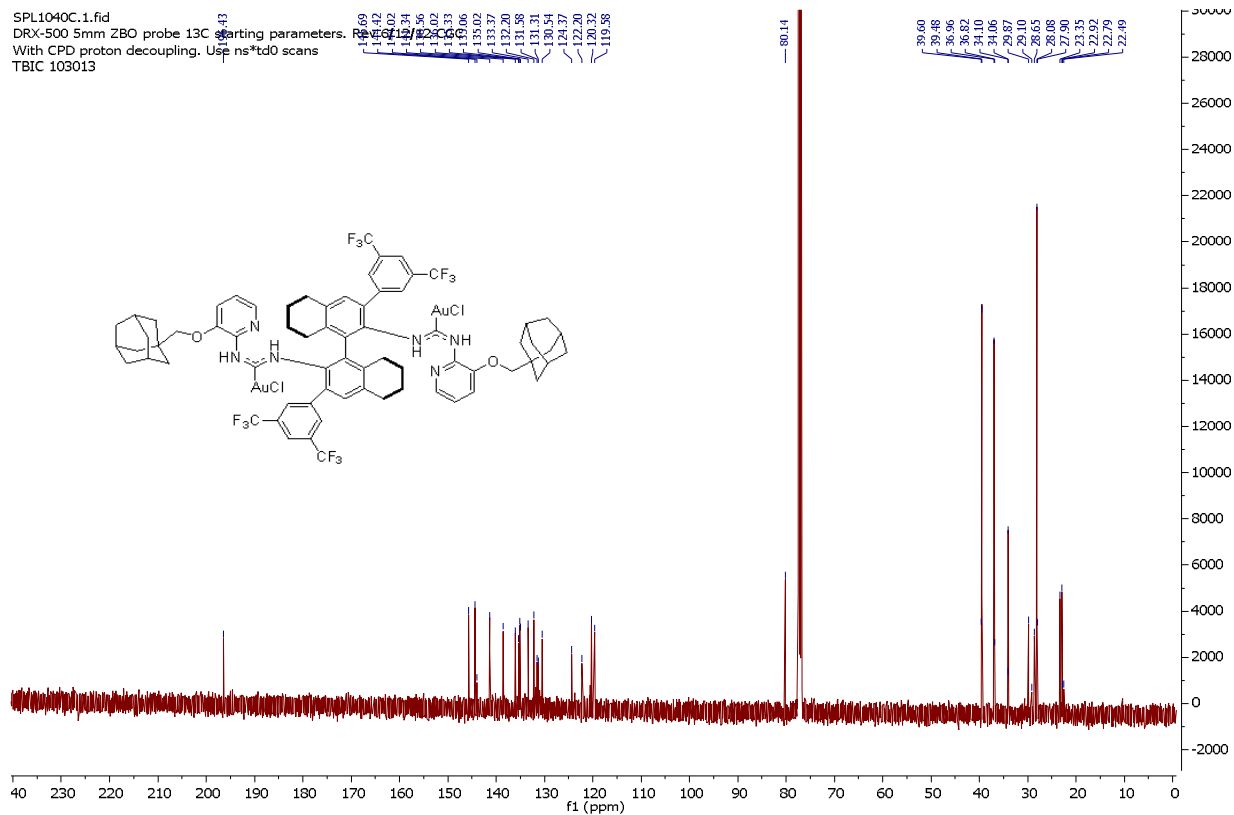

# Complex L24\*(AuCl)<sub>2</sub>

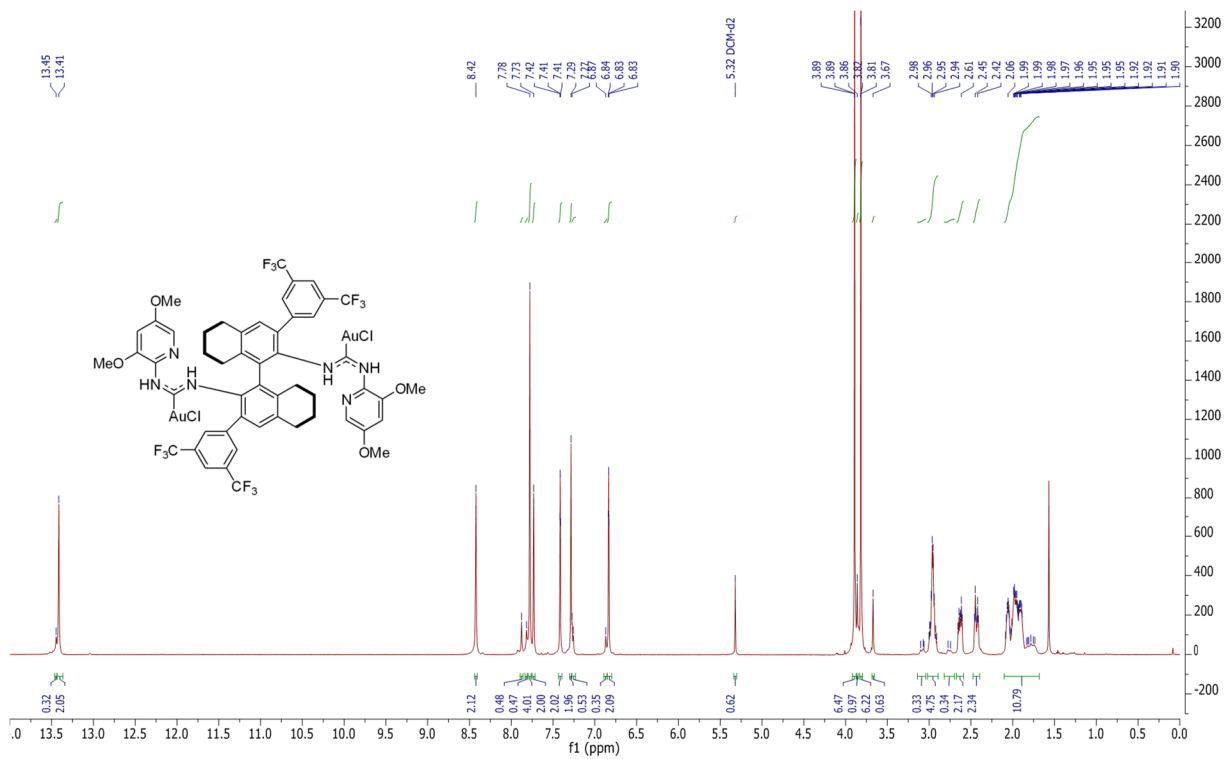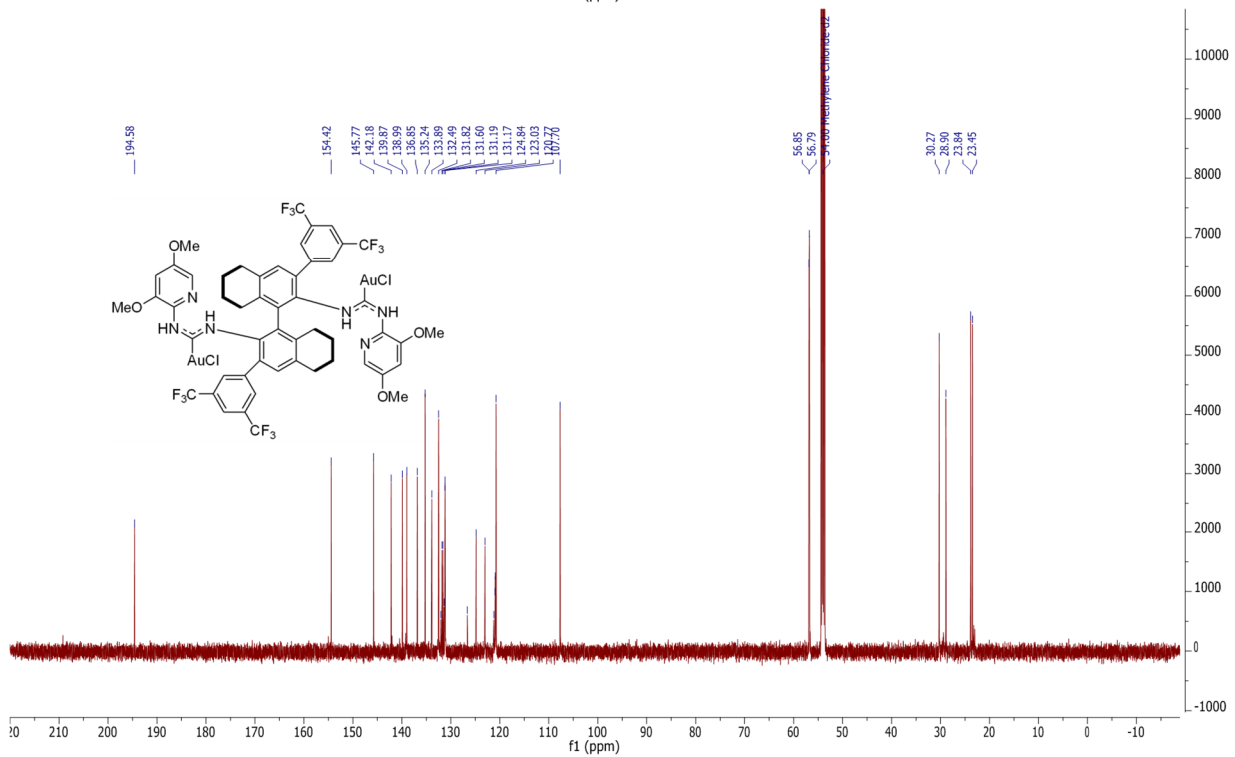

# Complex L25\*(AuCl)<sub>2</sub>

SPL1048H.1.fid

AVQ-400 QNP Protein starting parameters. 7/16/03. Revised 7/22/03 RN

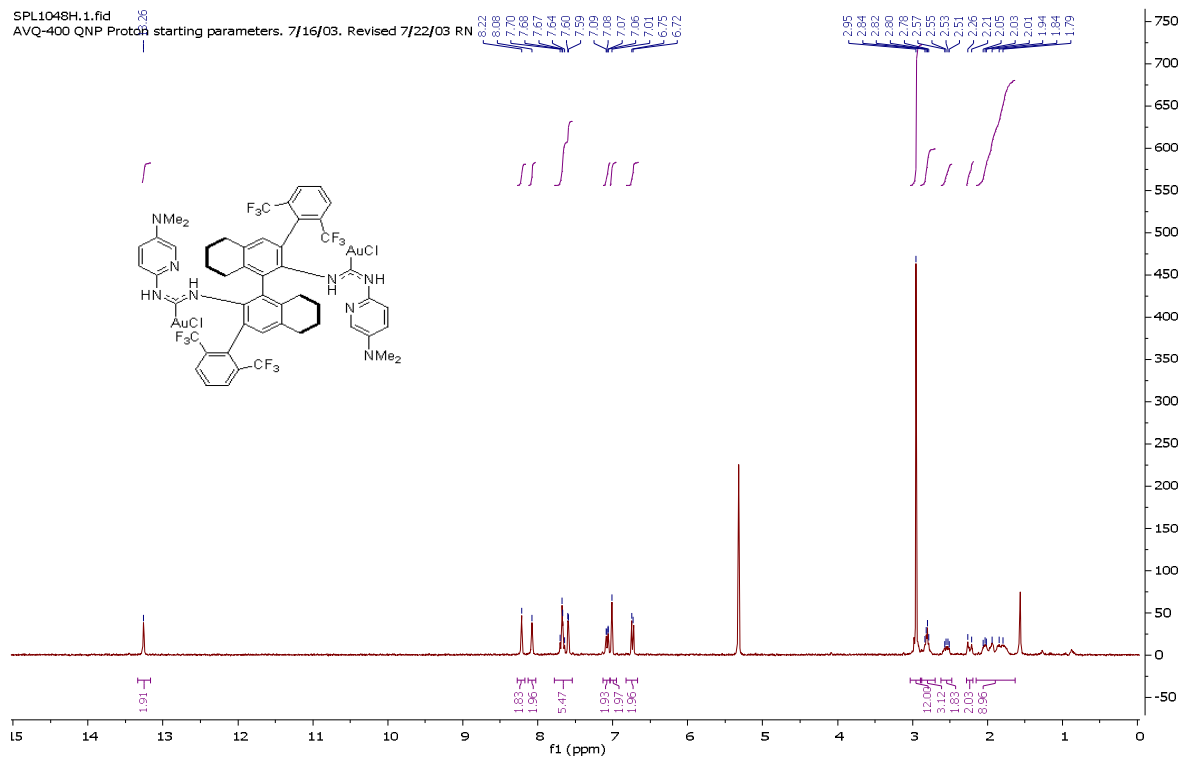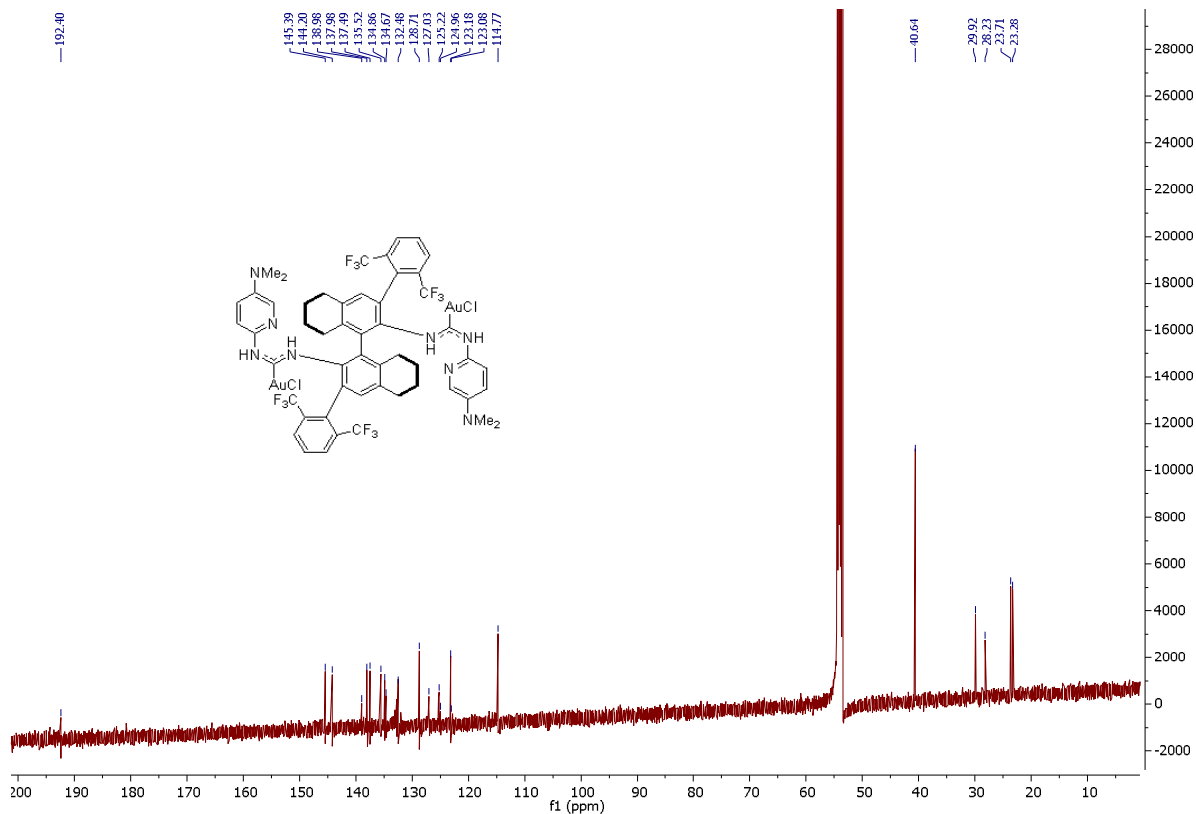

# Complex L26\*(AuCl)<sub>2</sub>

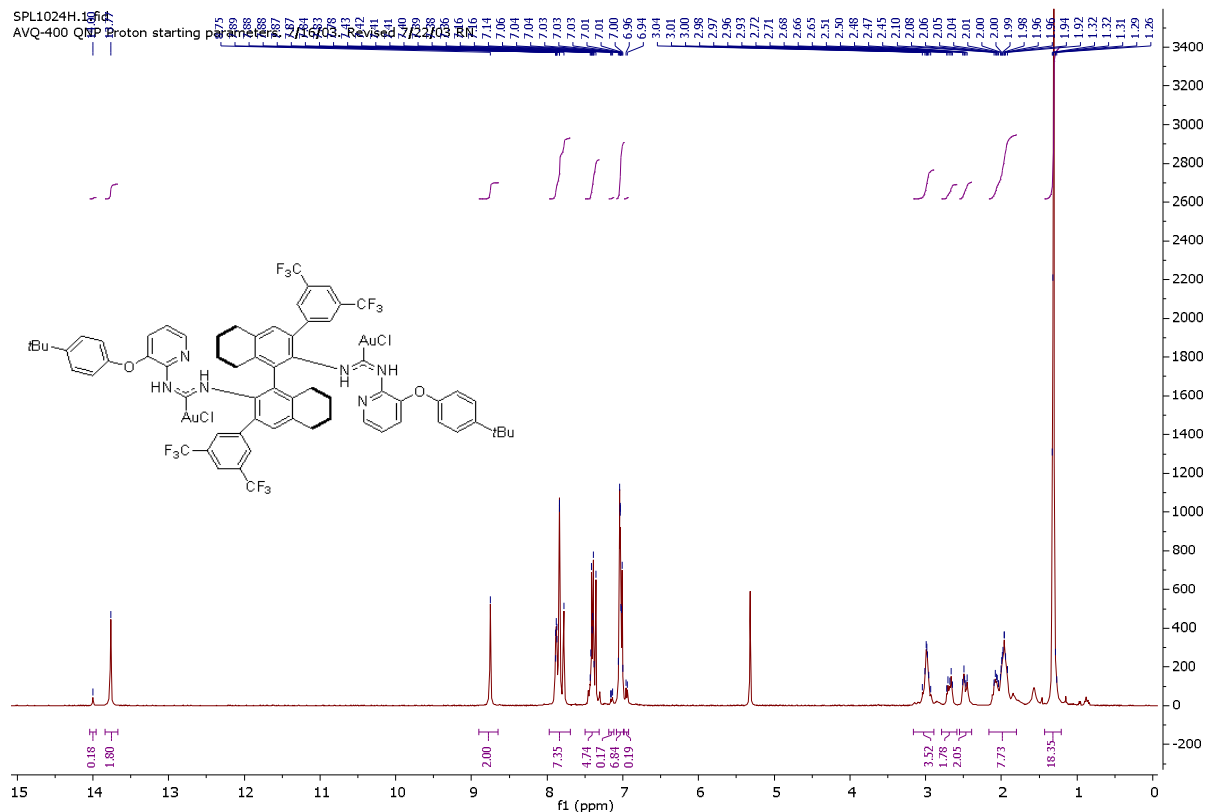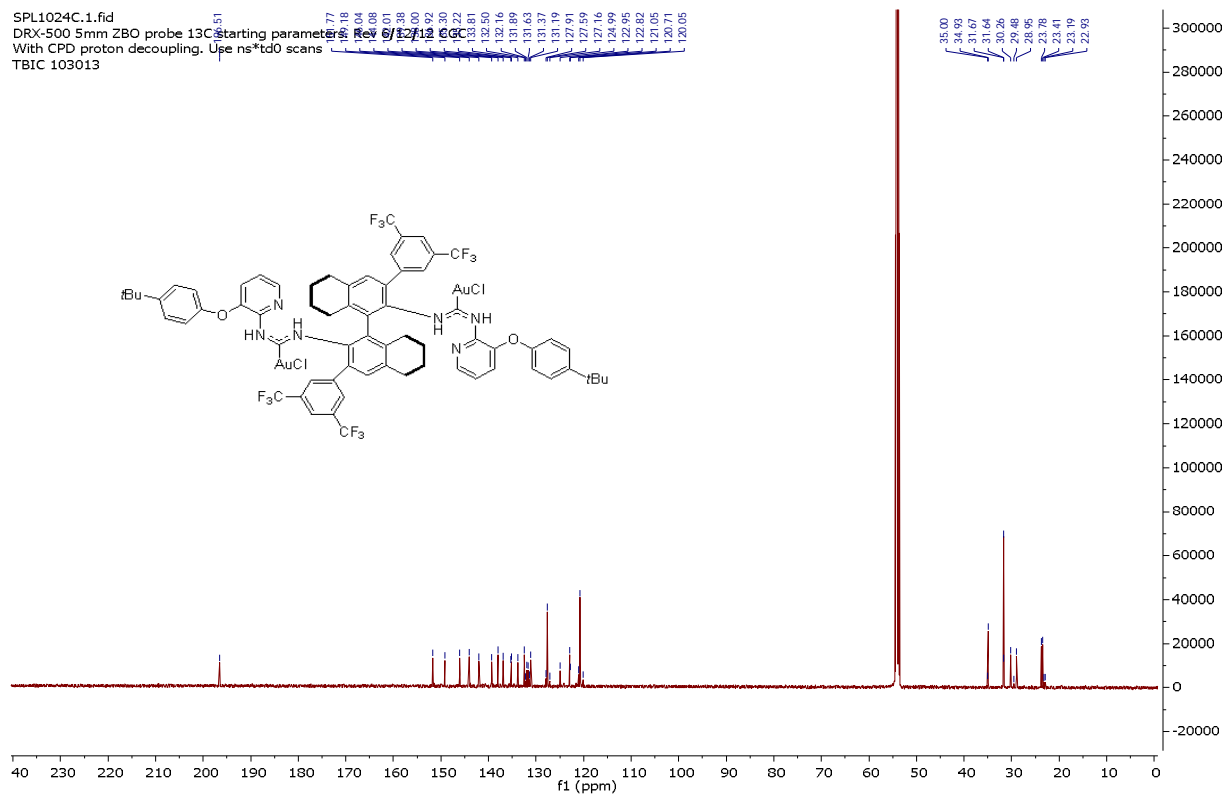



# Complex L28\*(AuCl)<sub>2</sub>

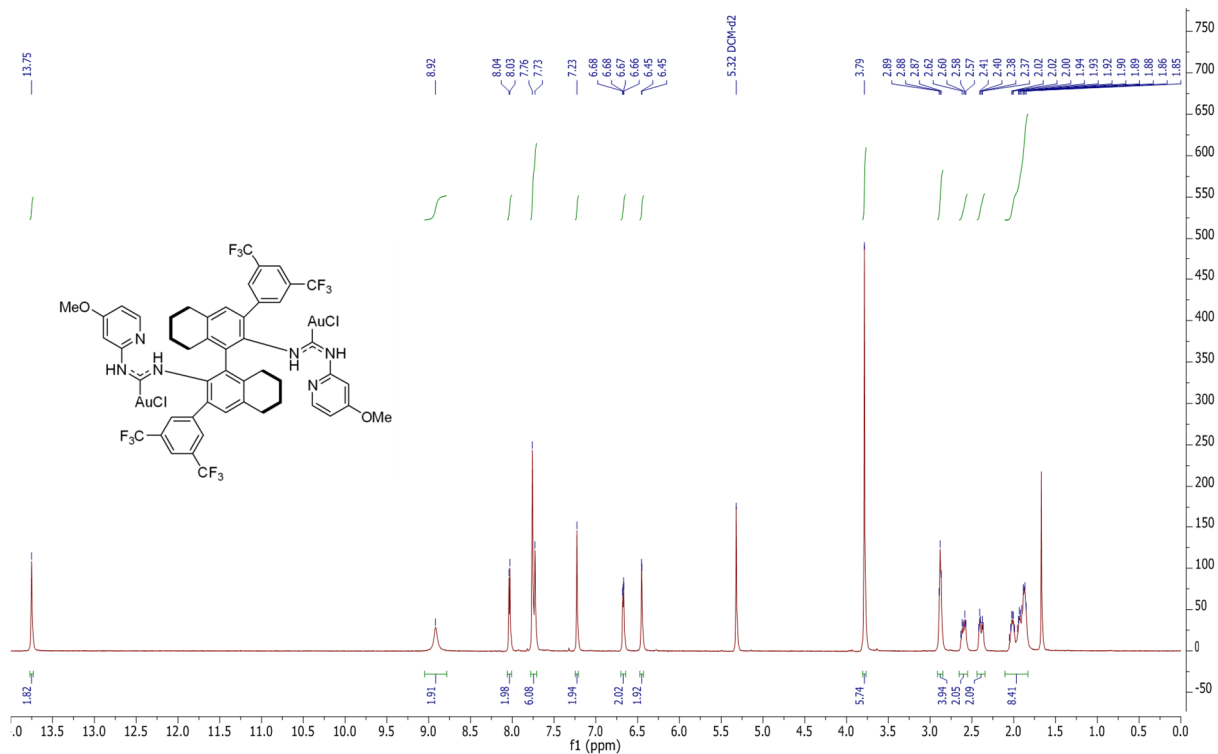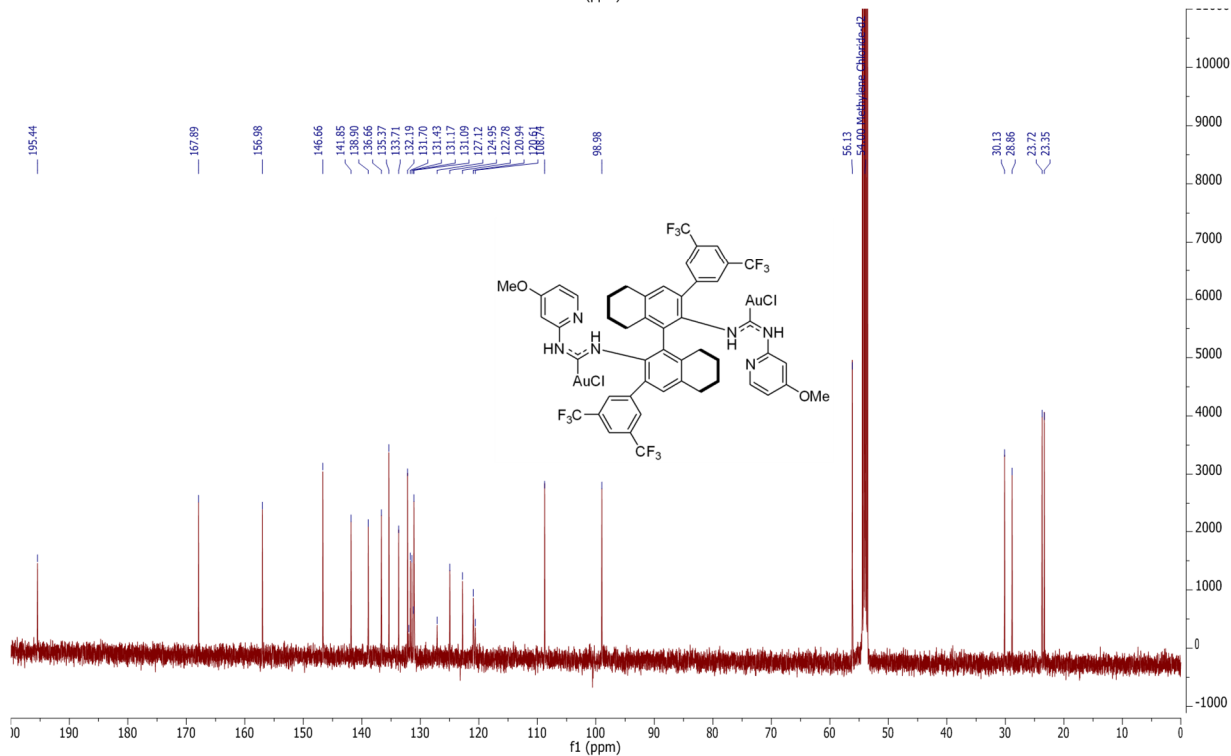





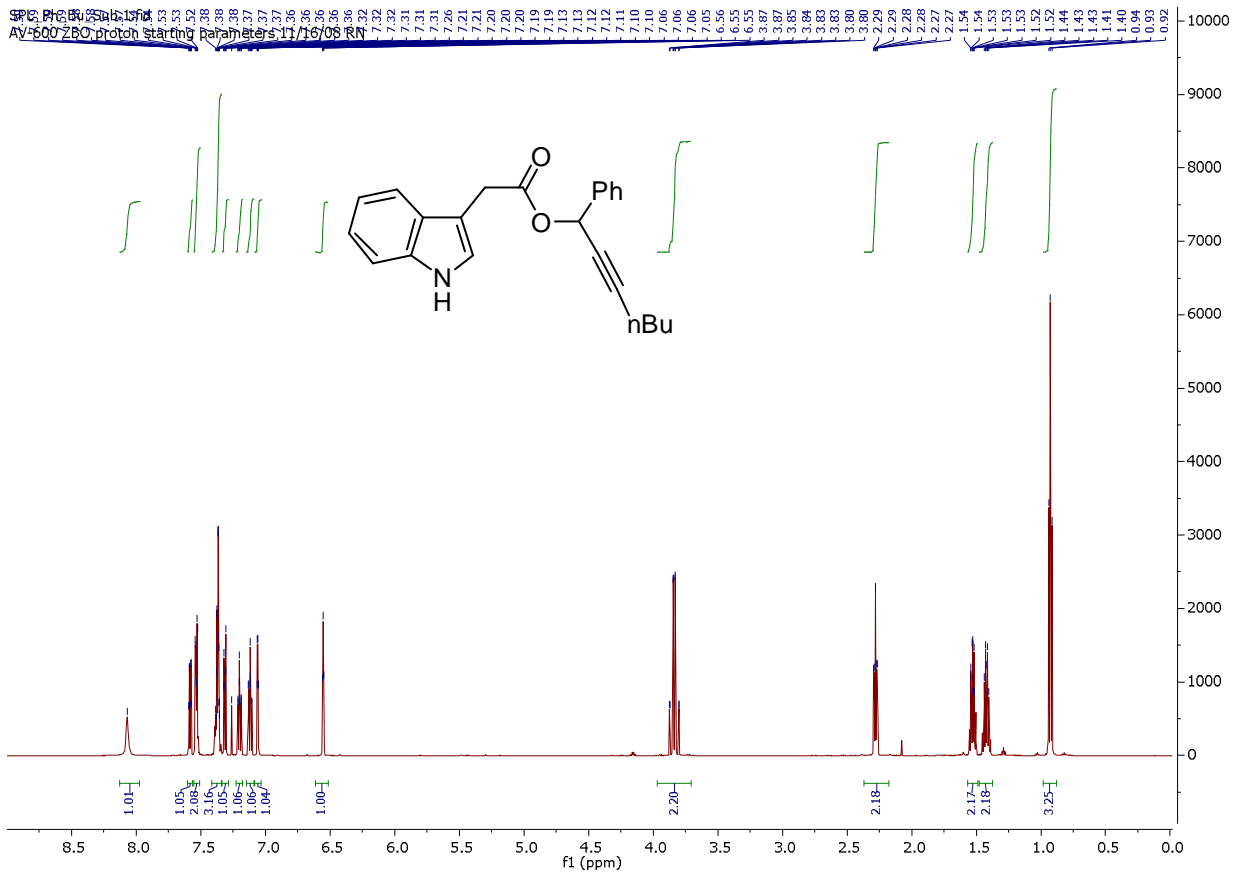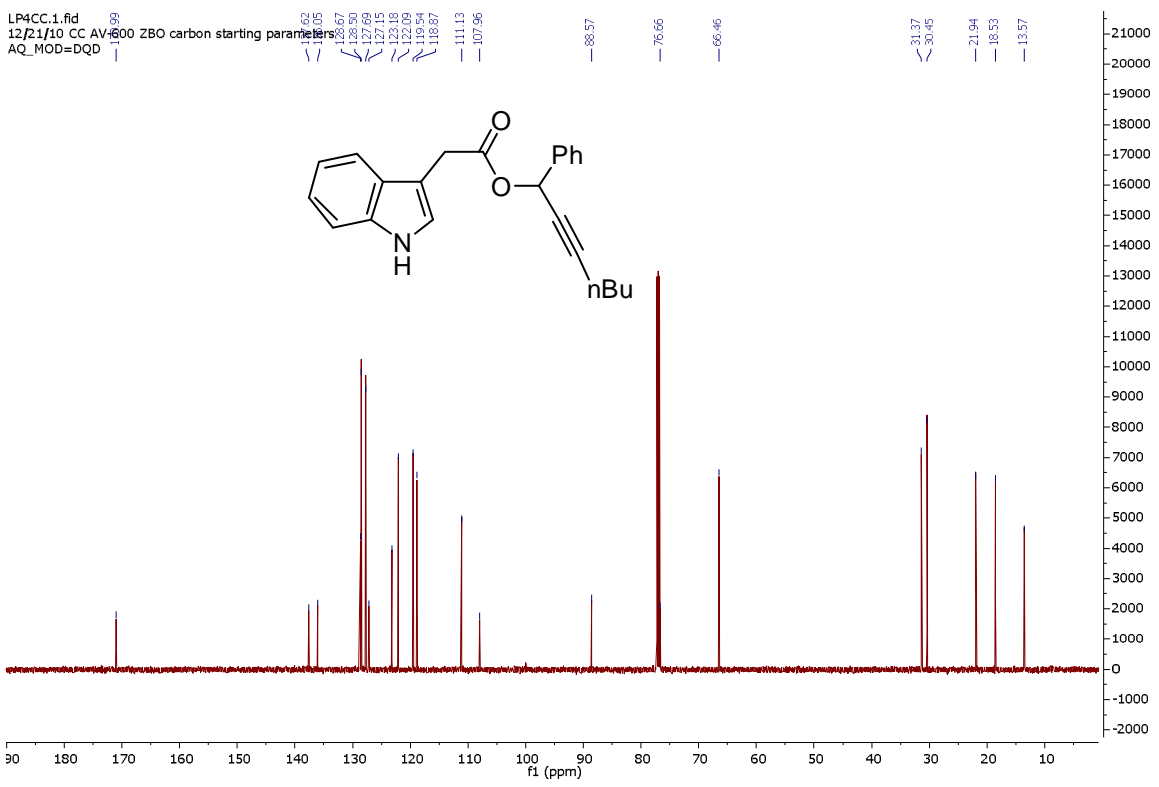

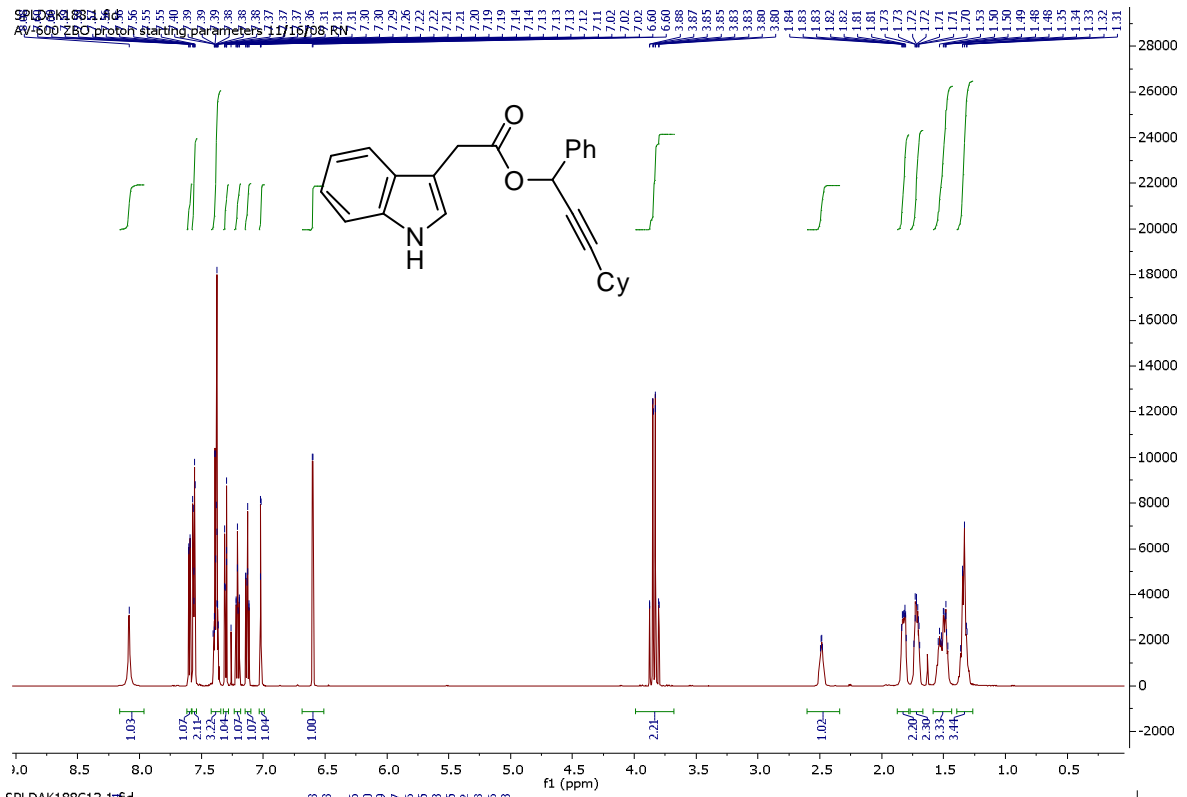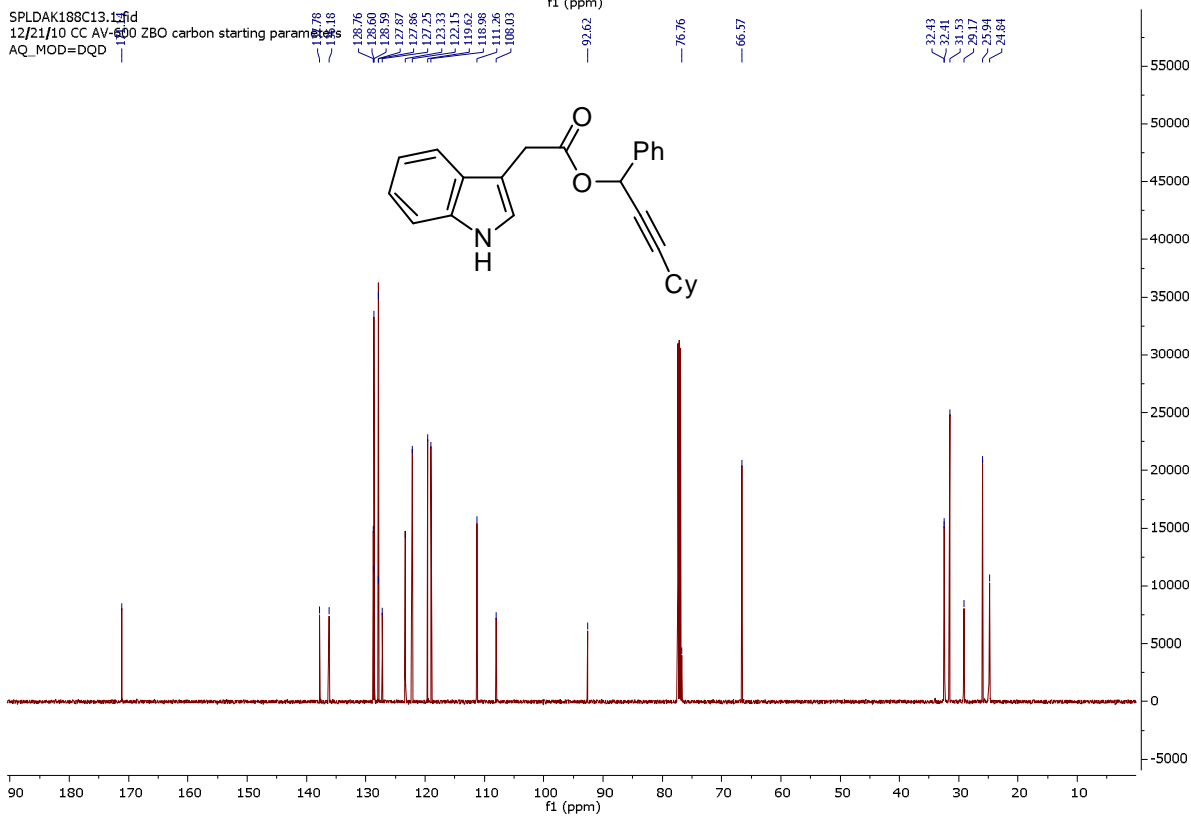

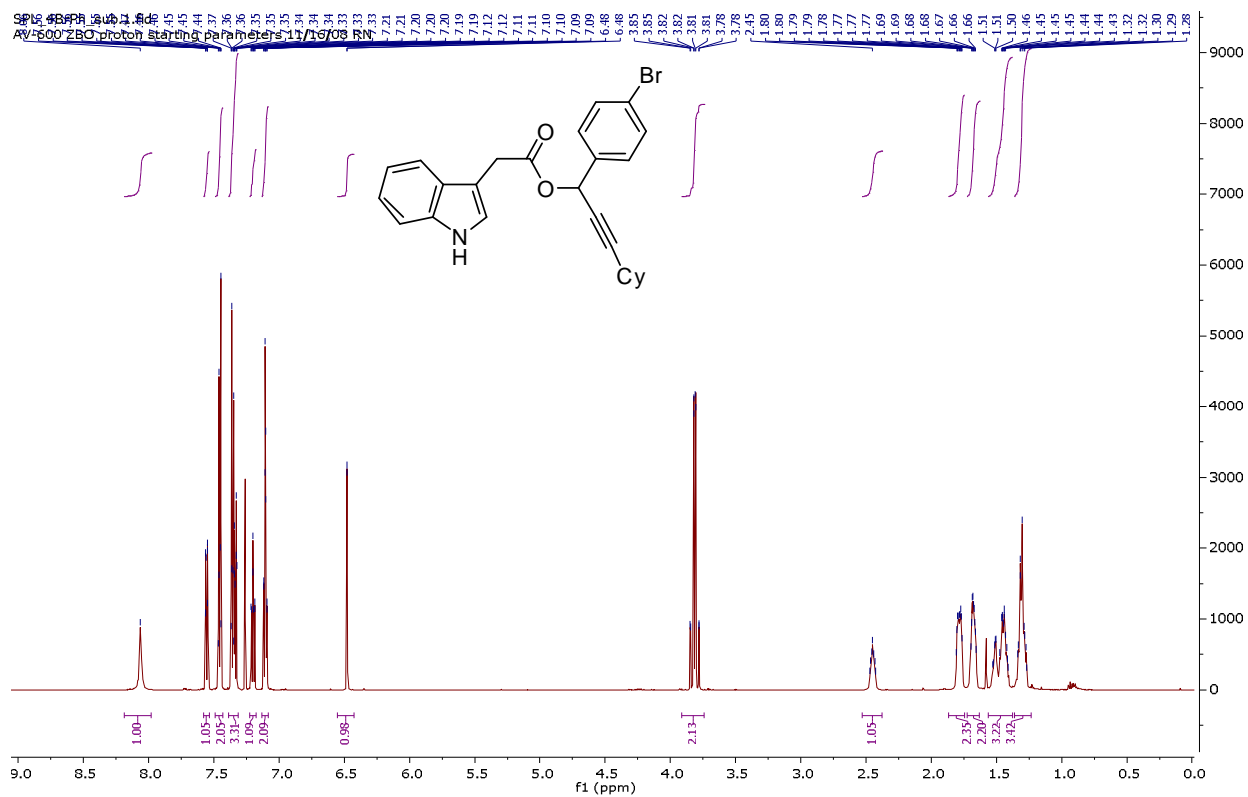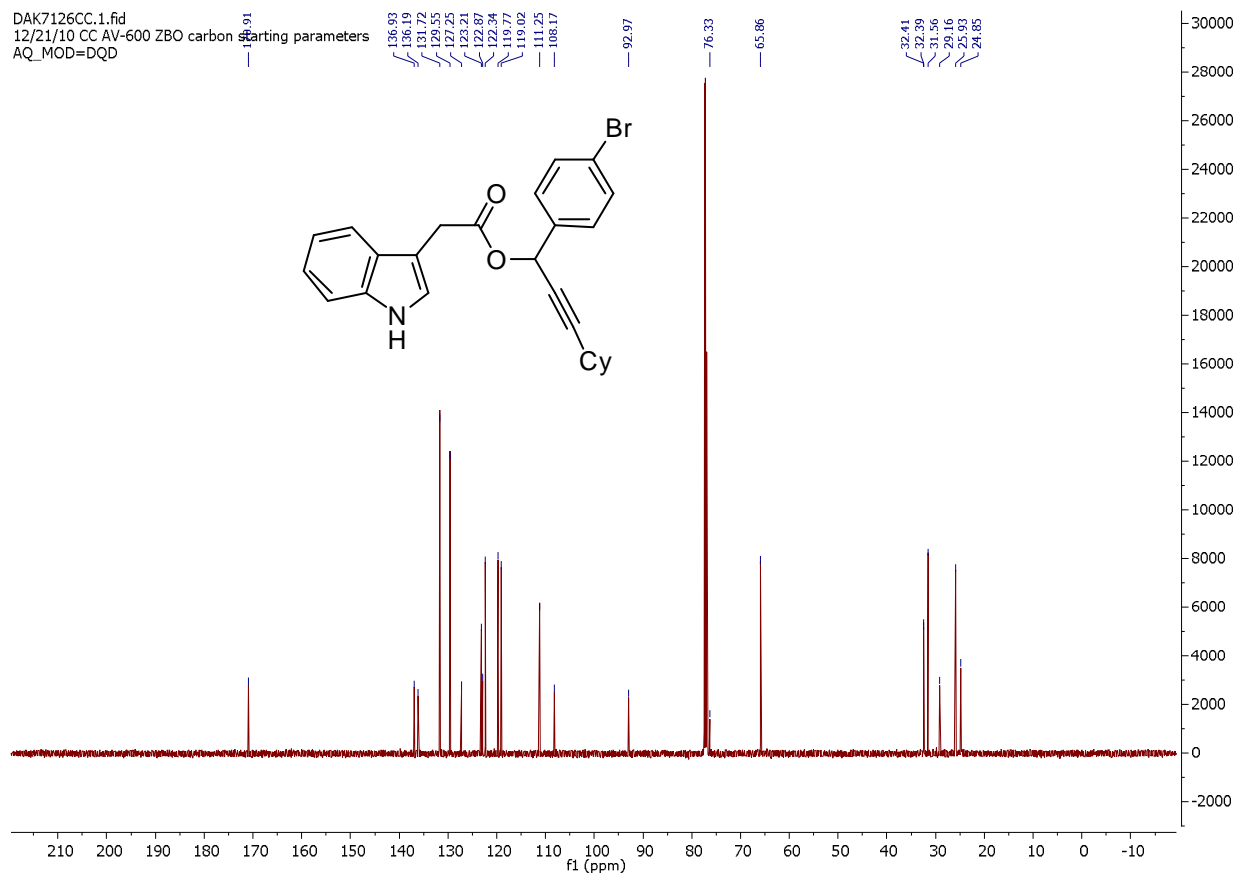

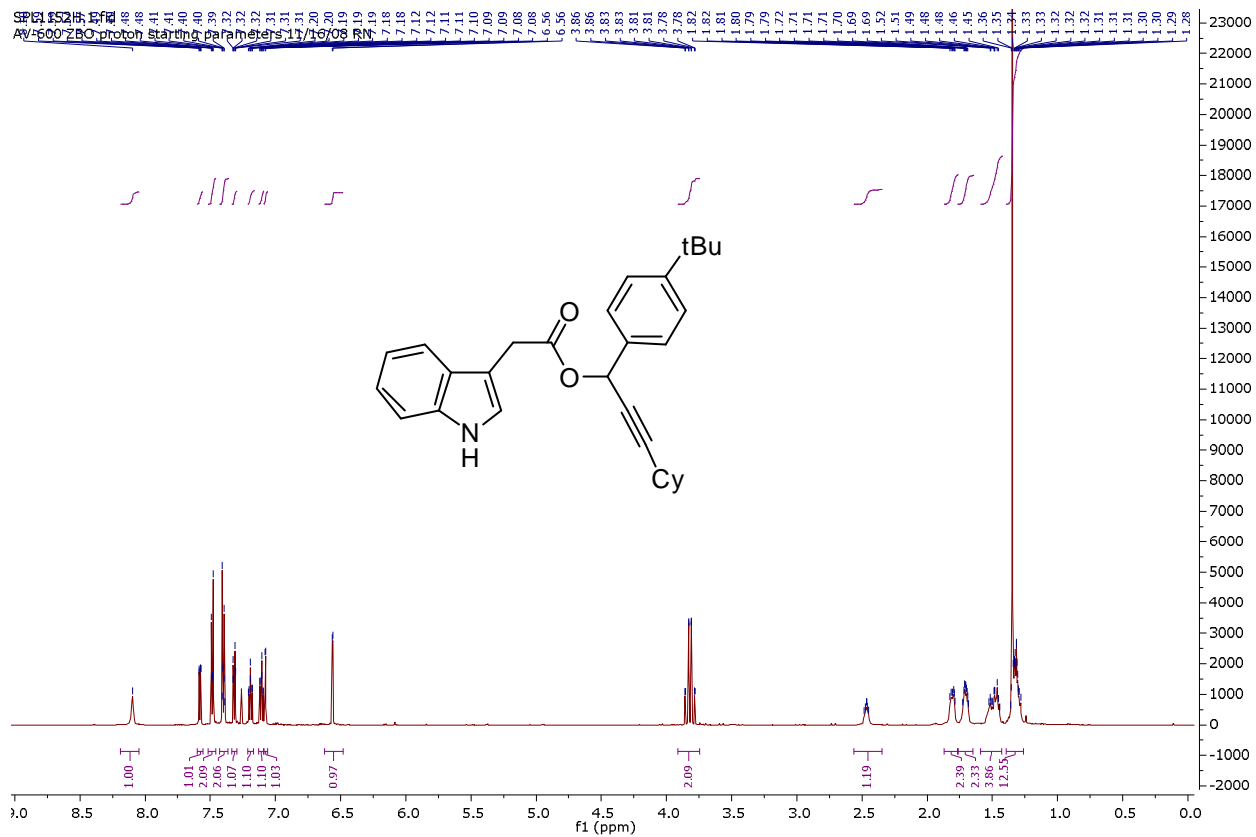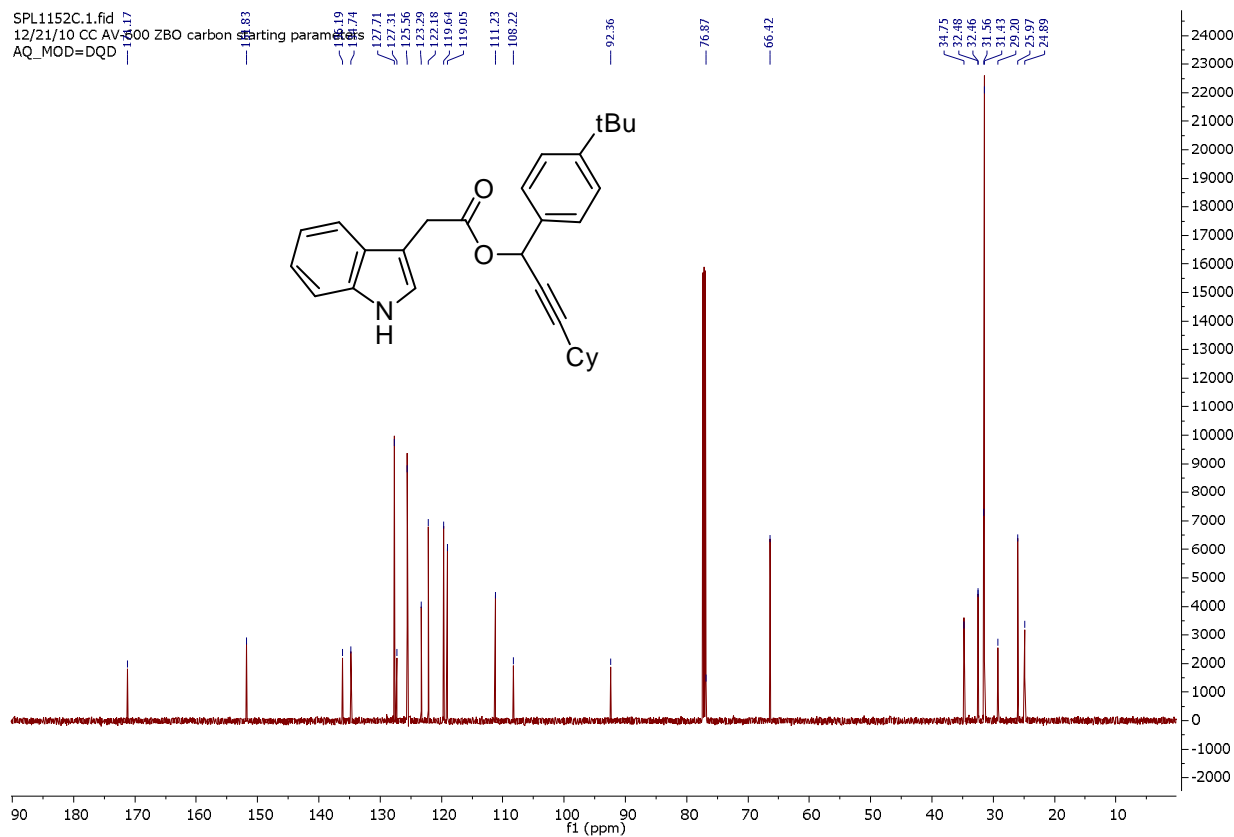

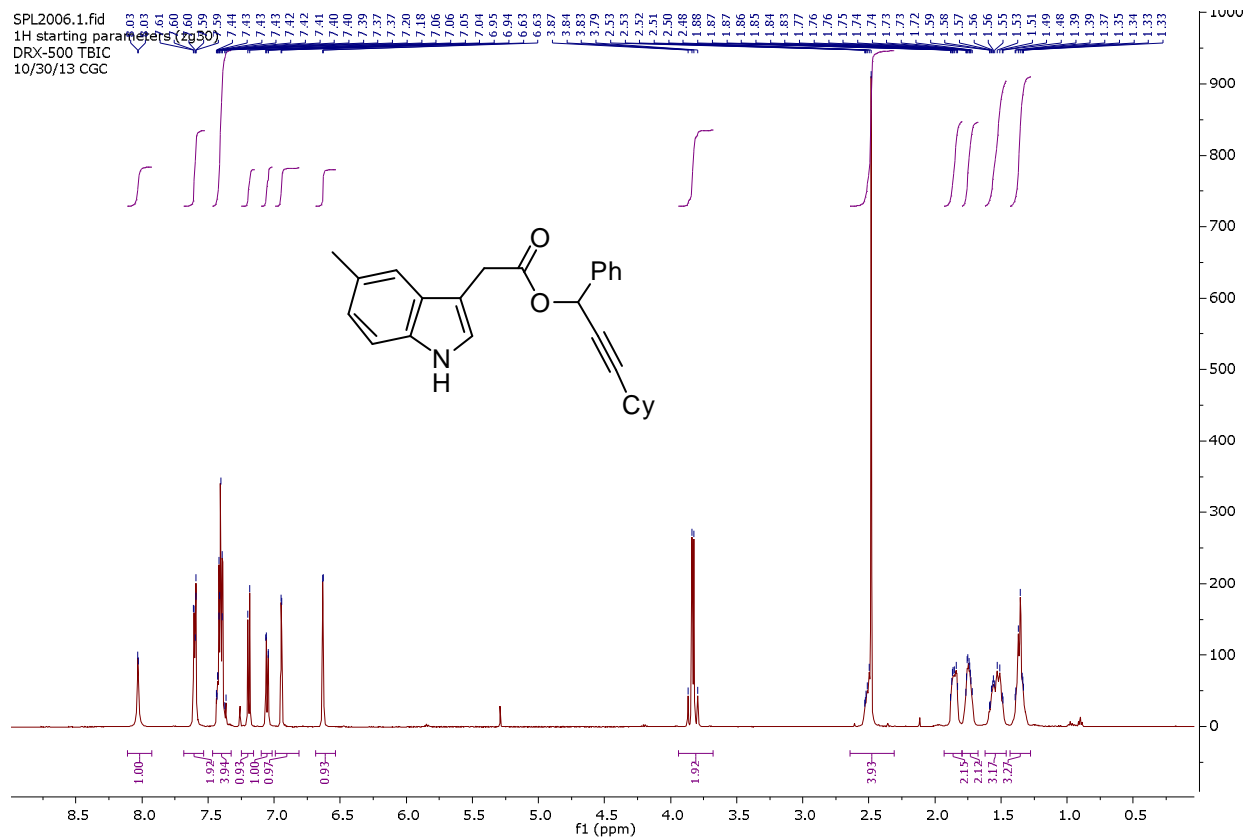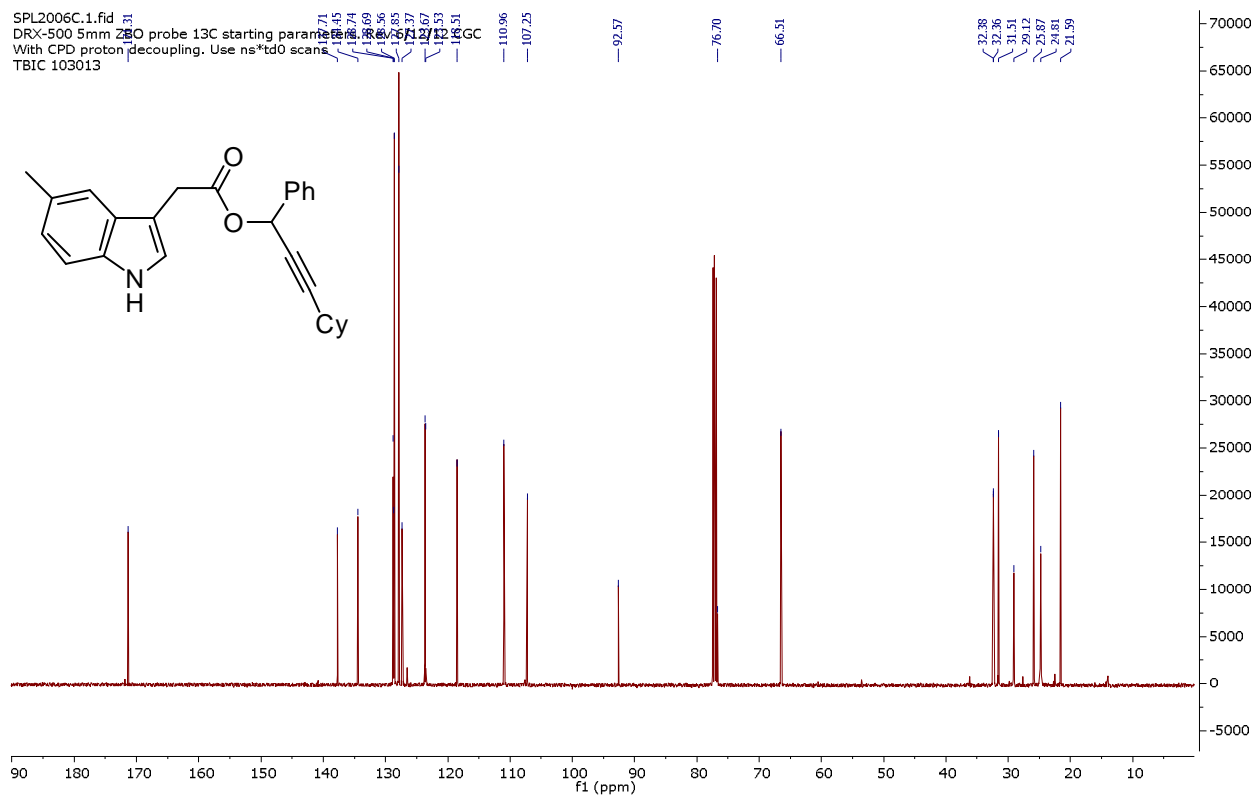

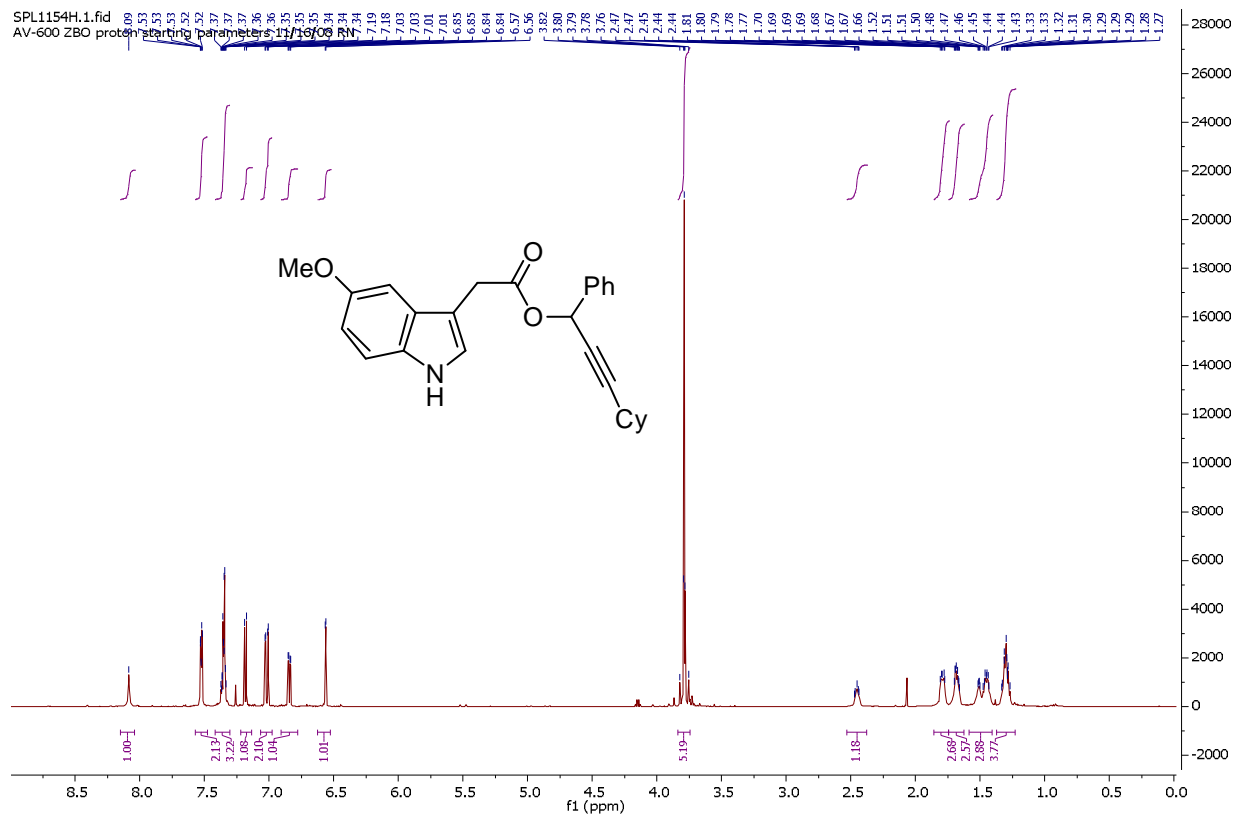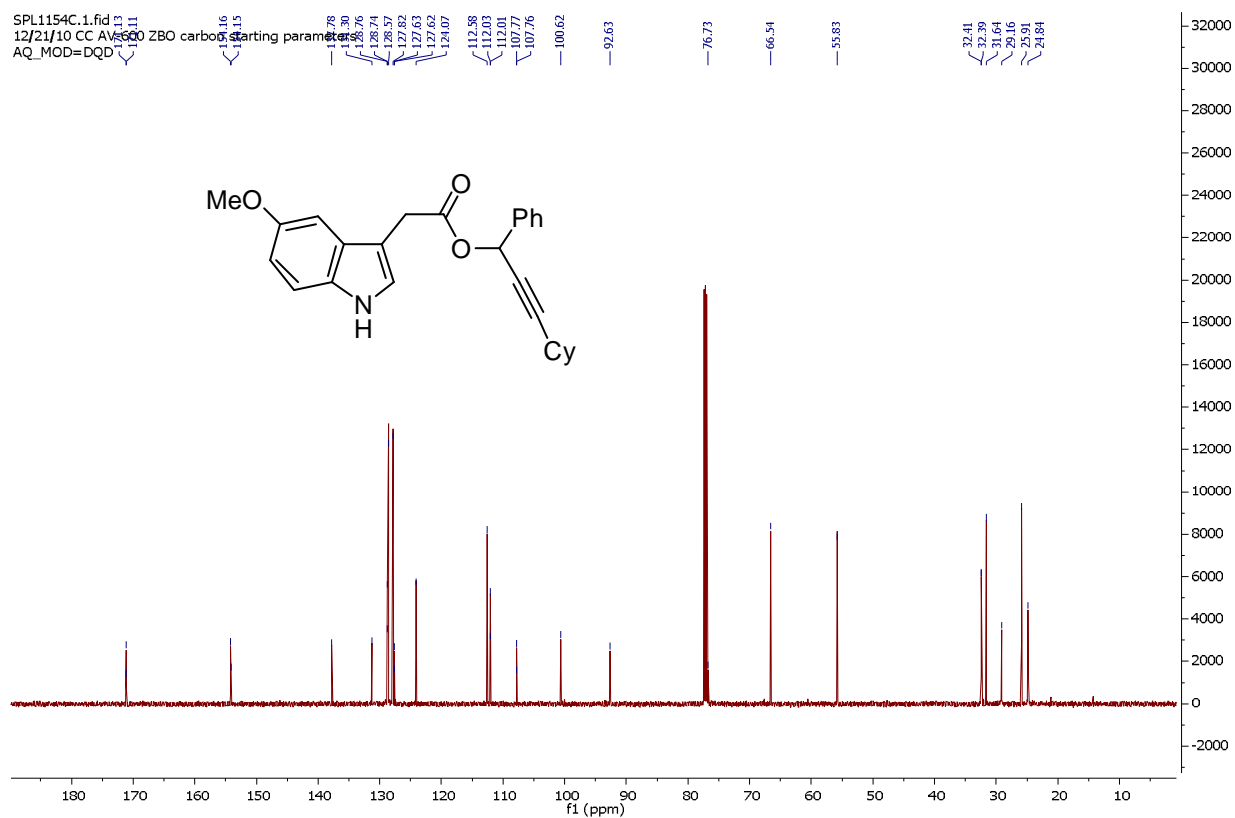





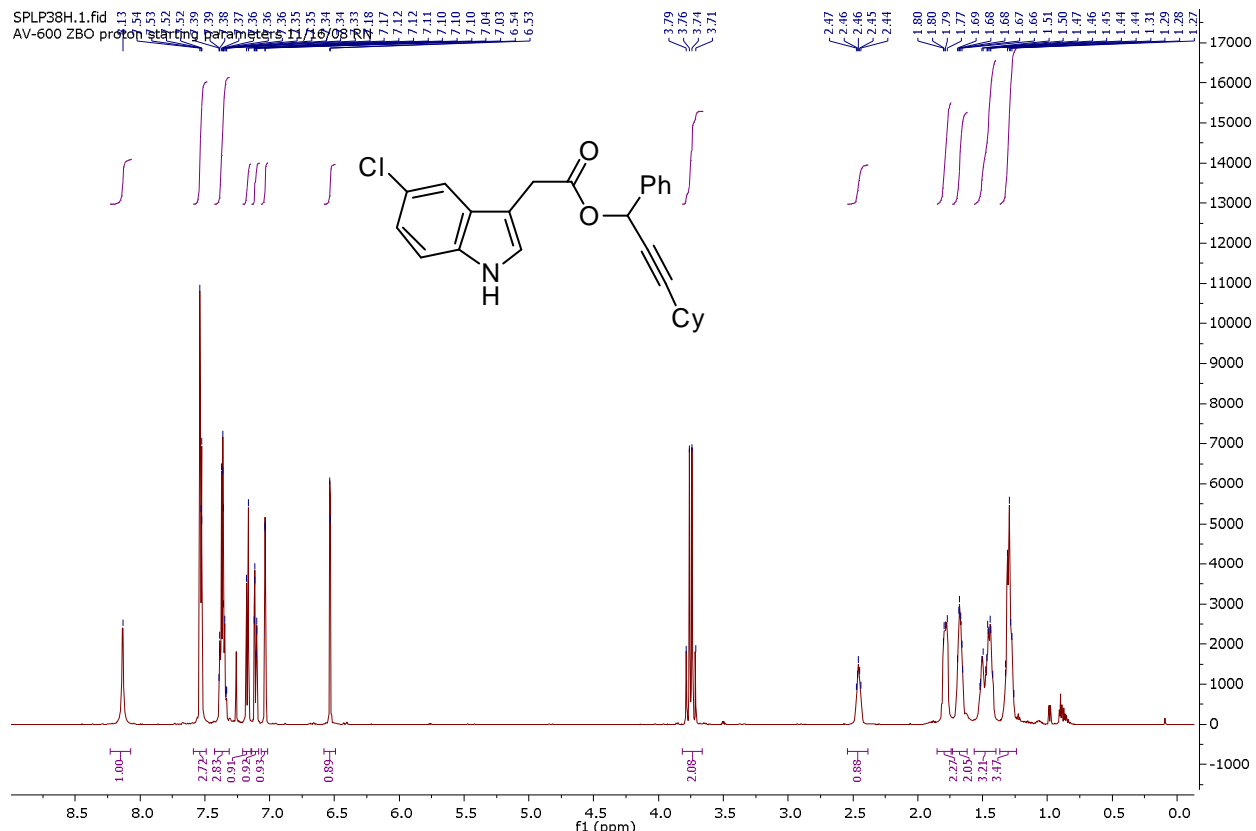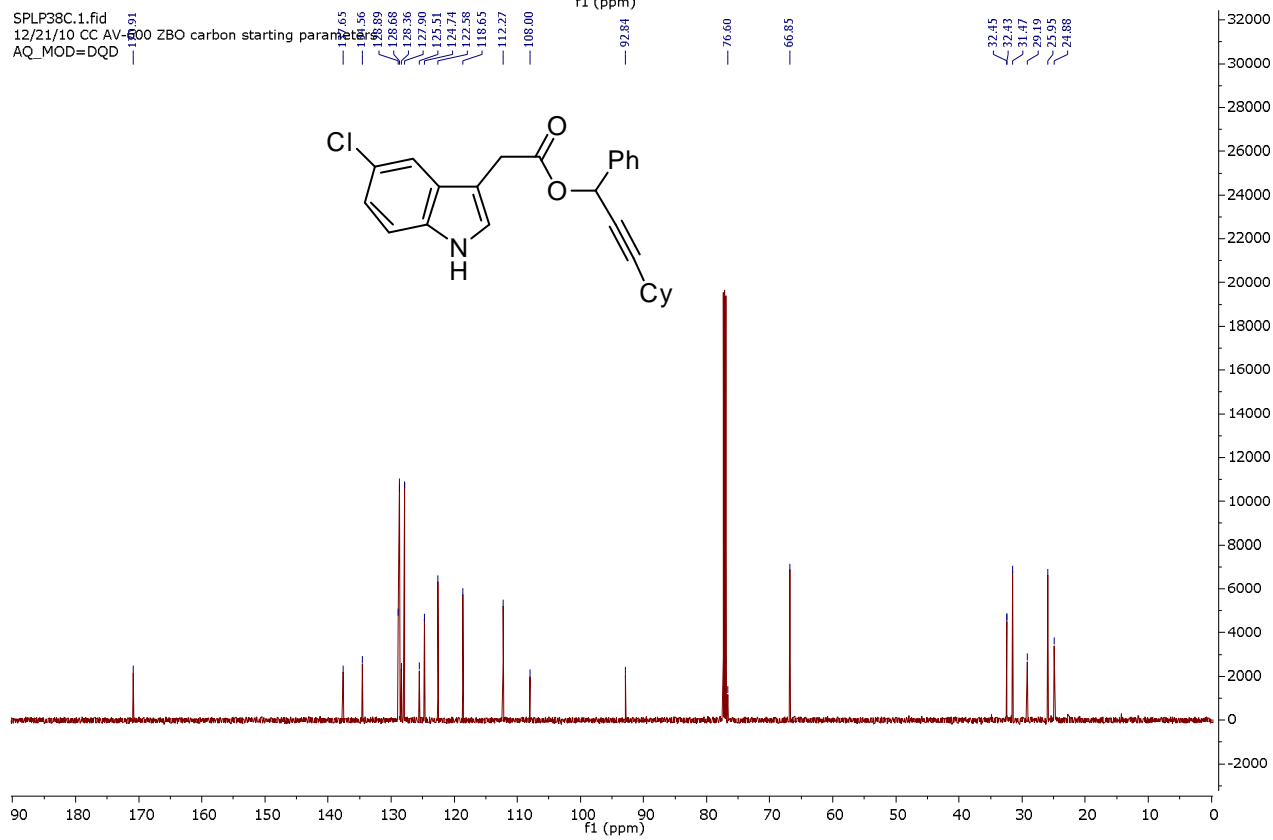



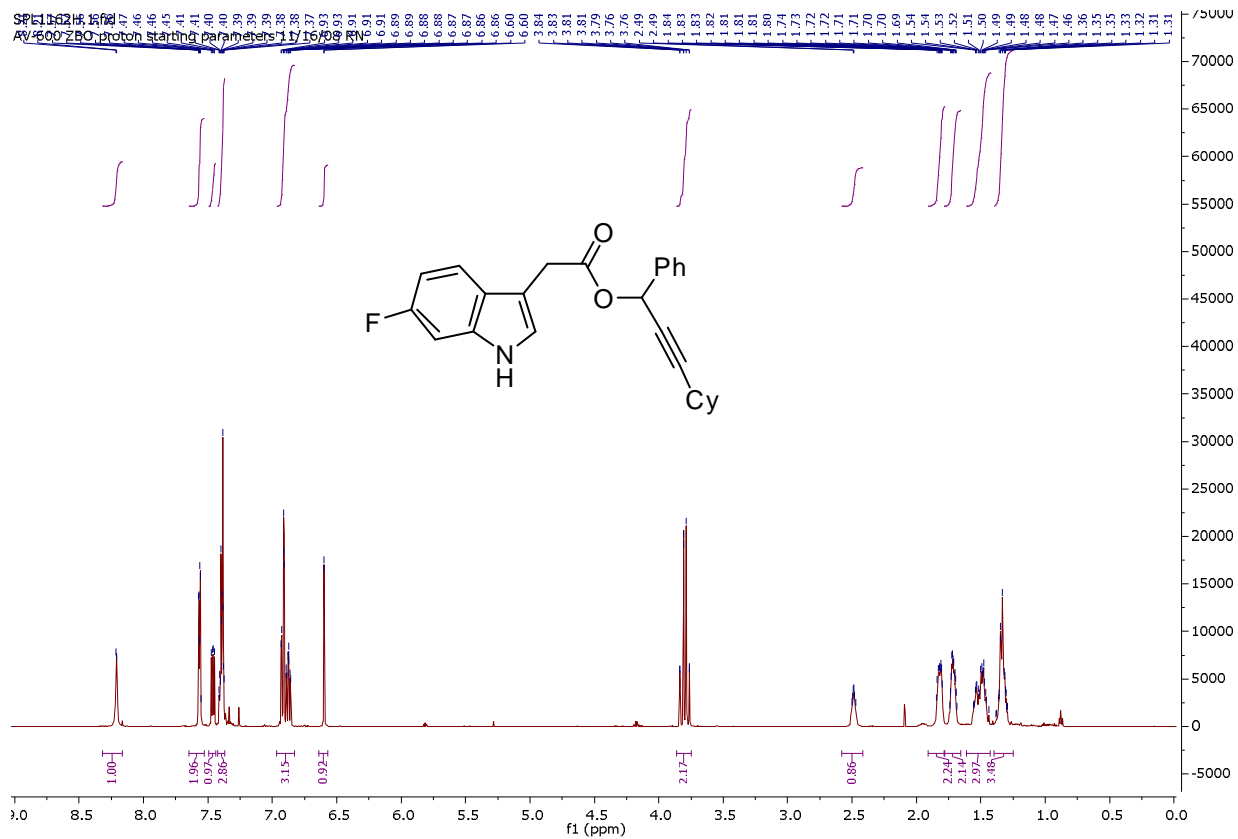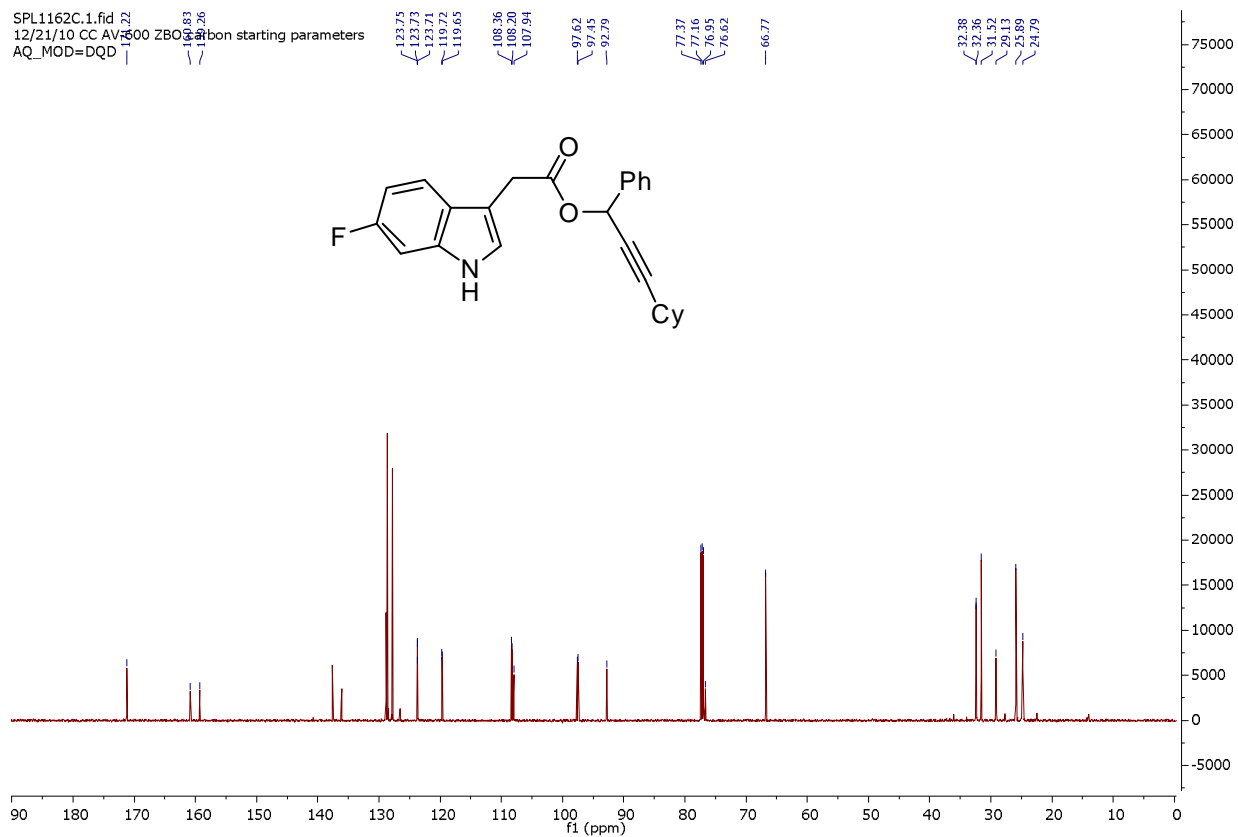



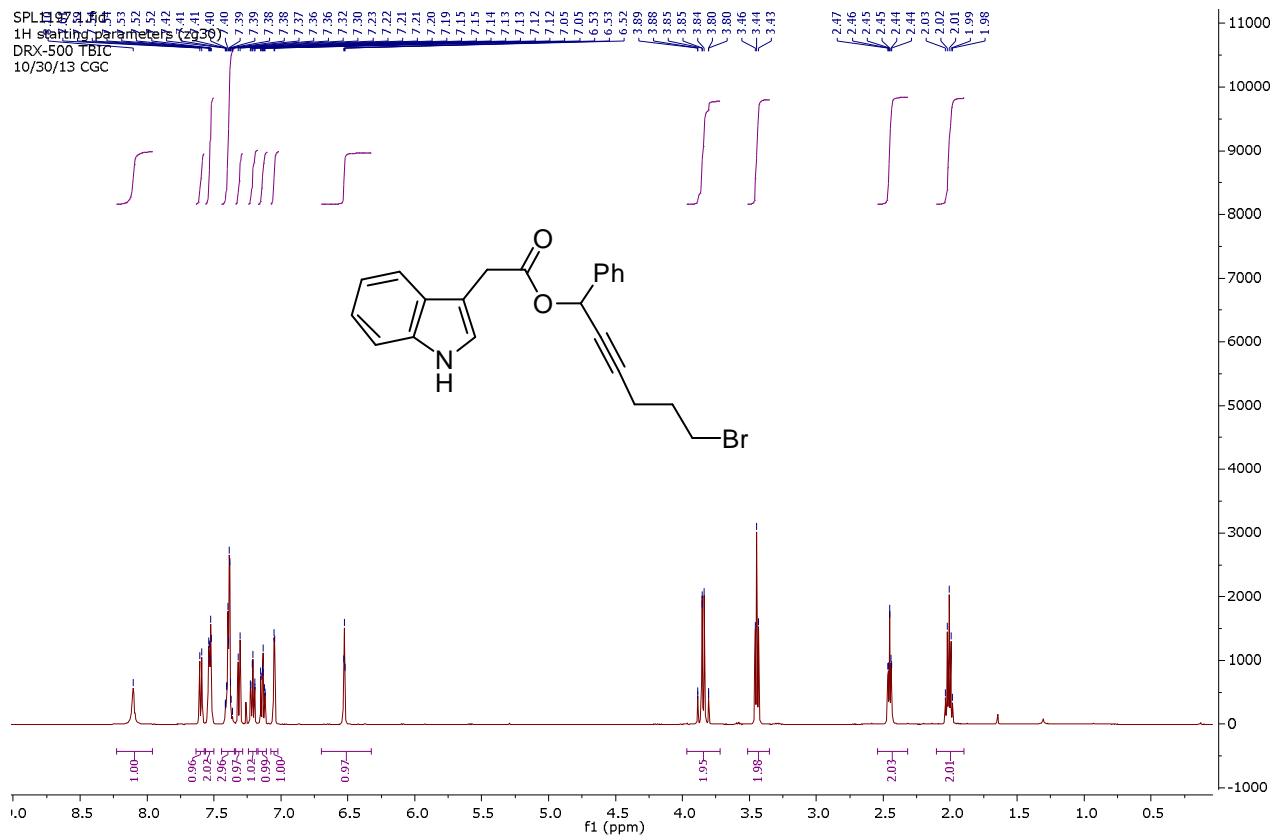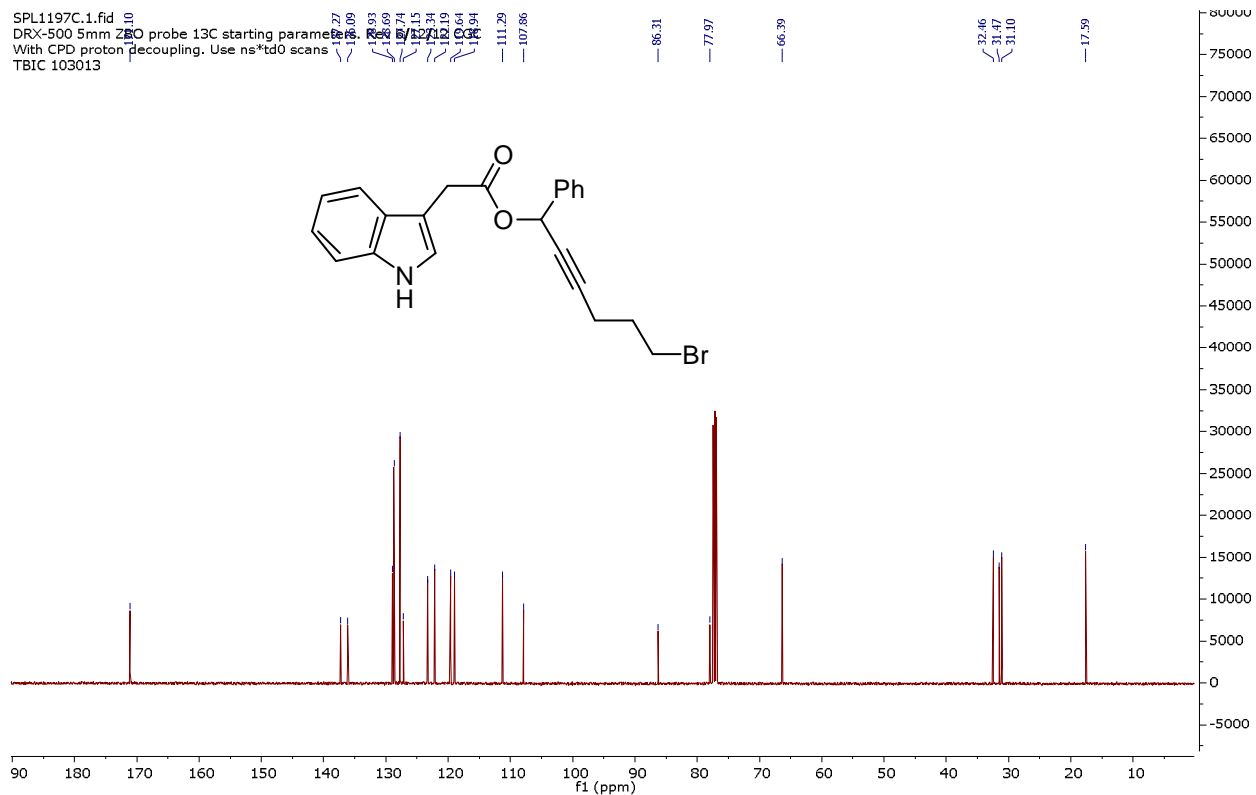

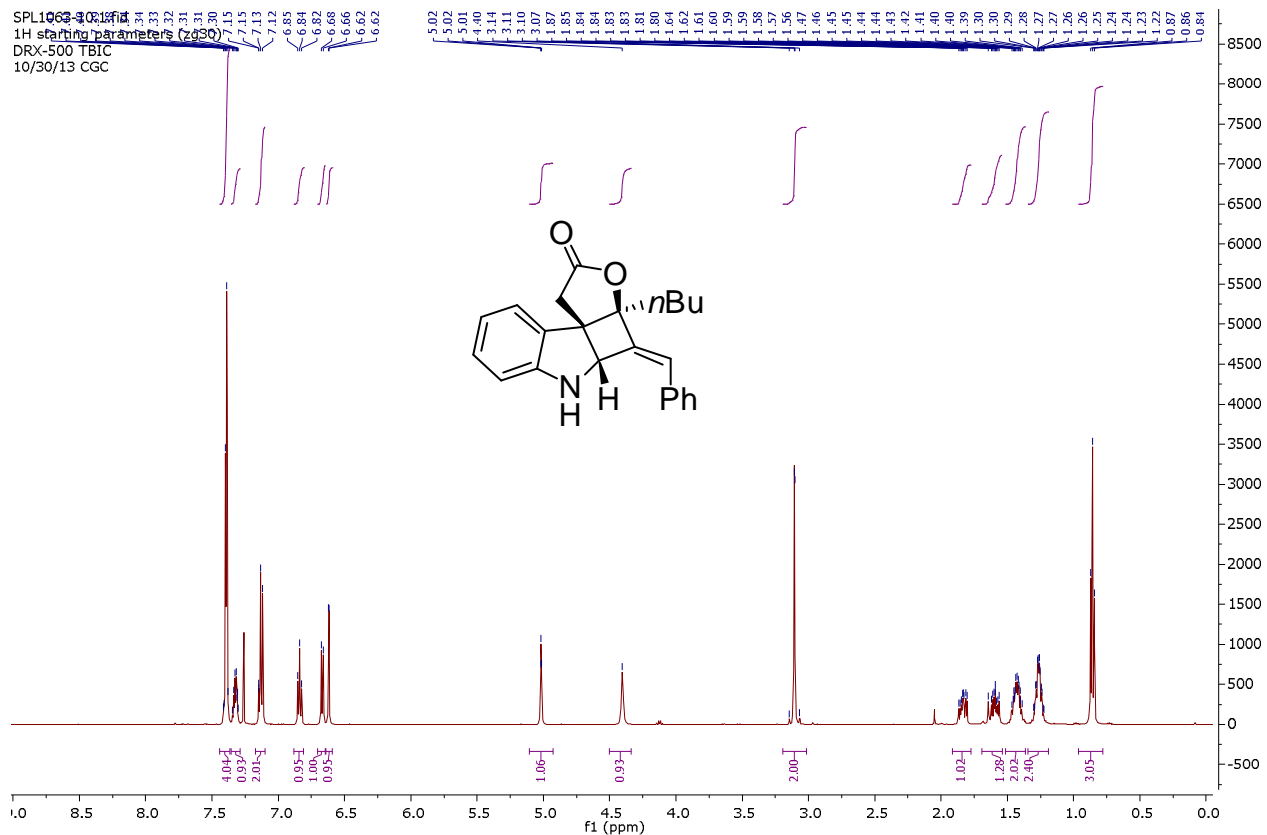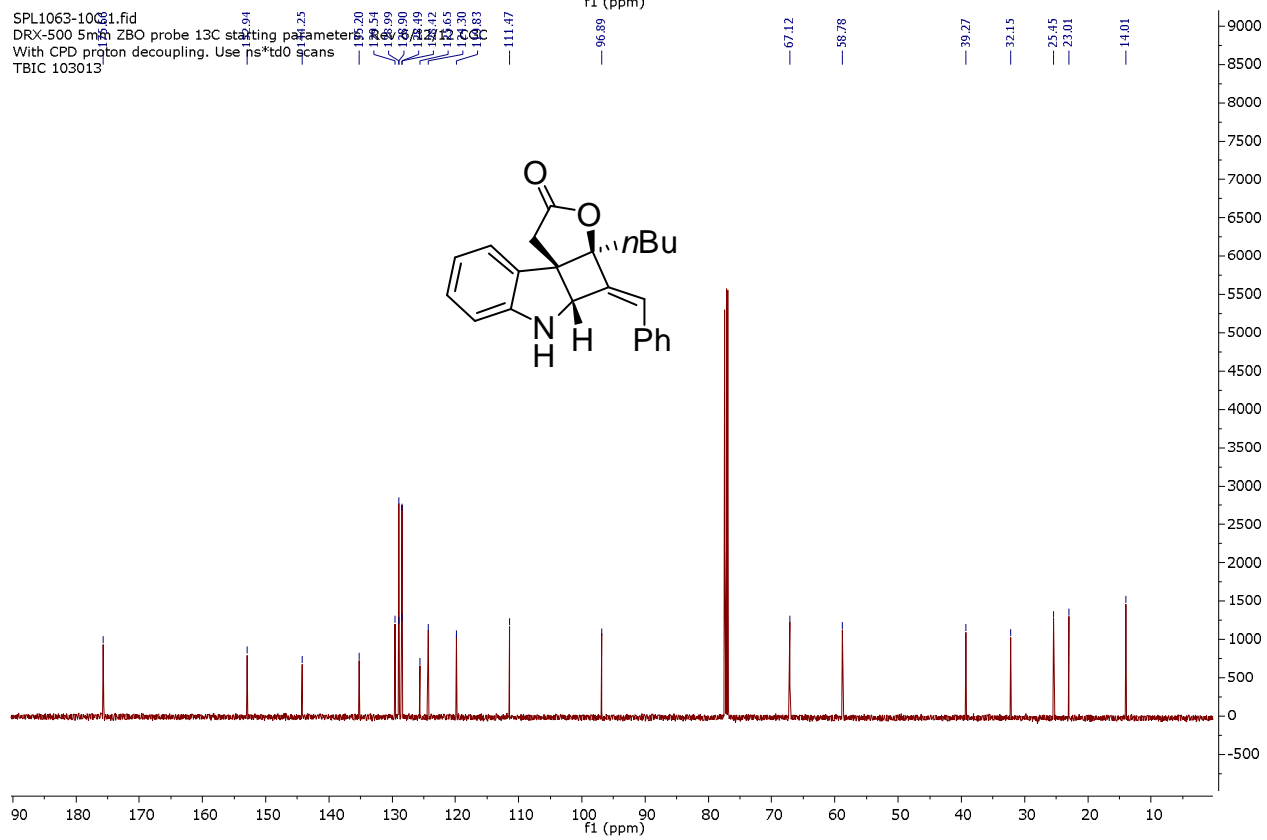

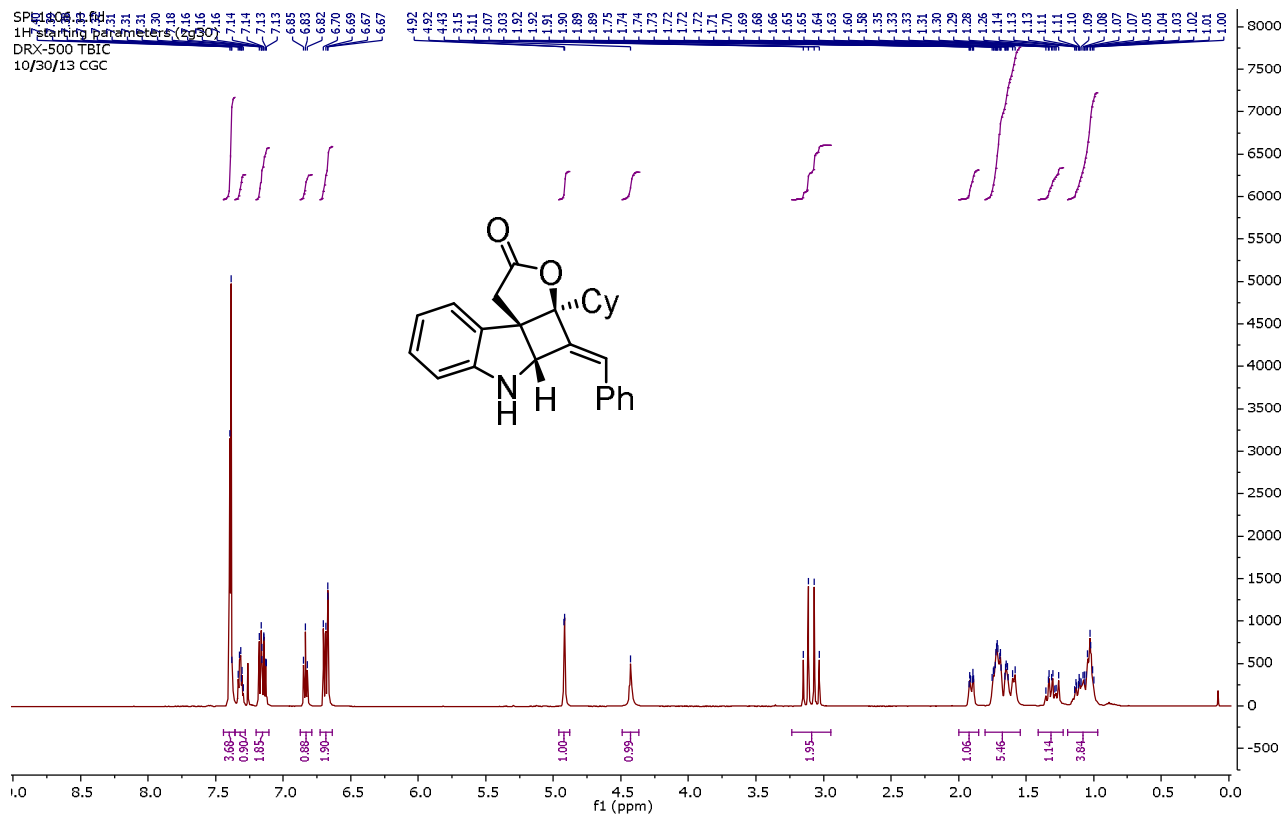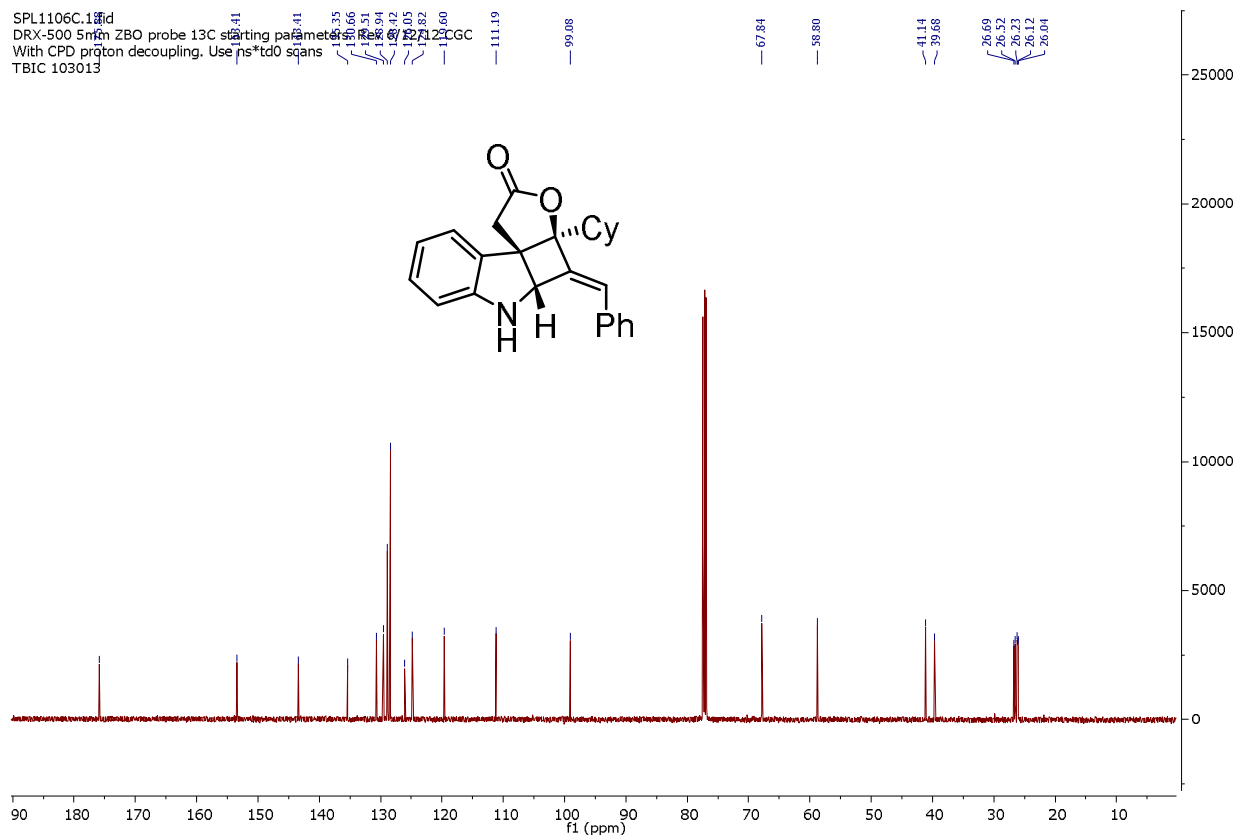





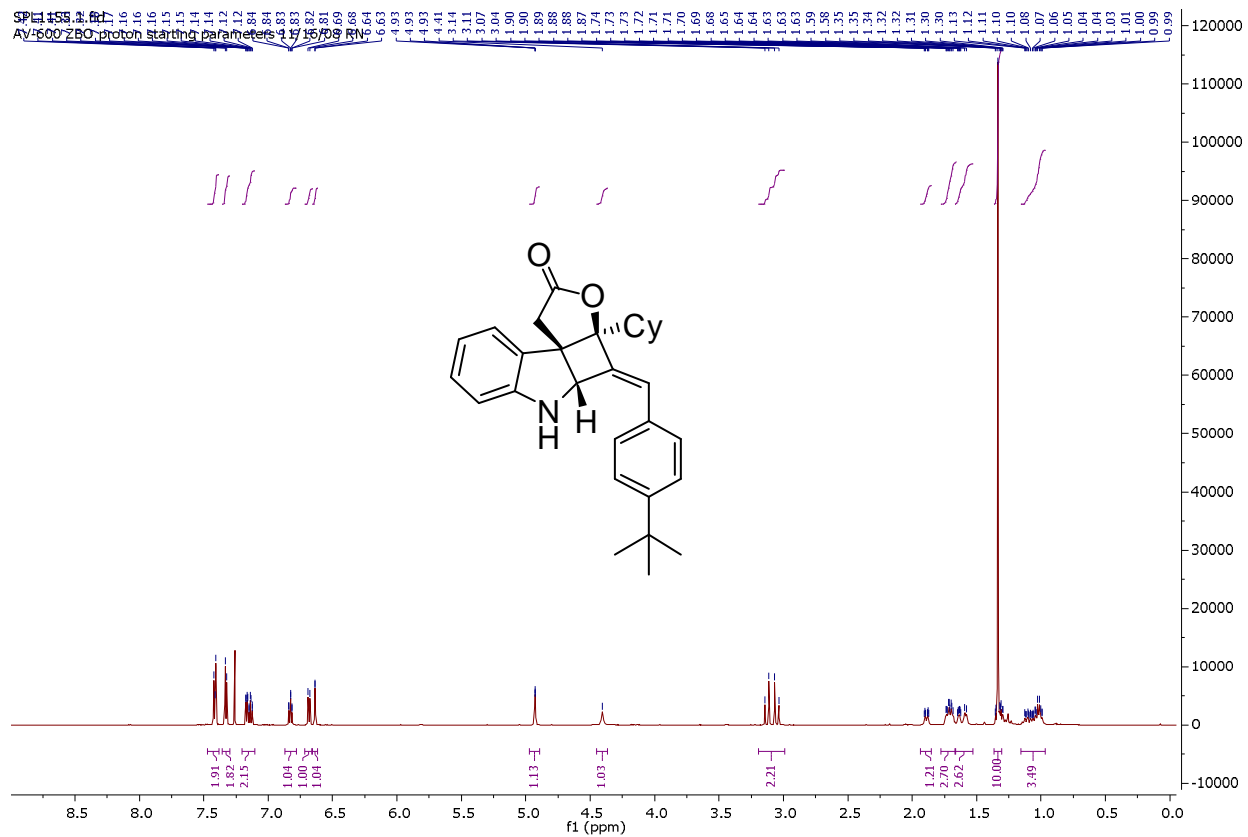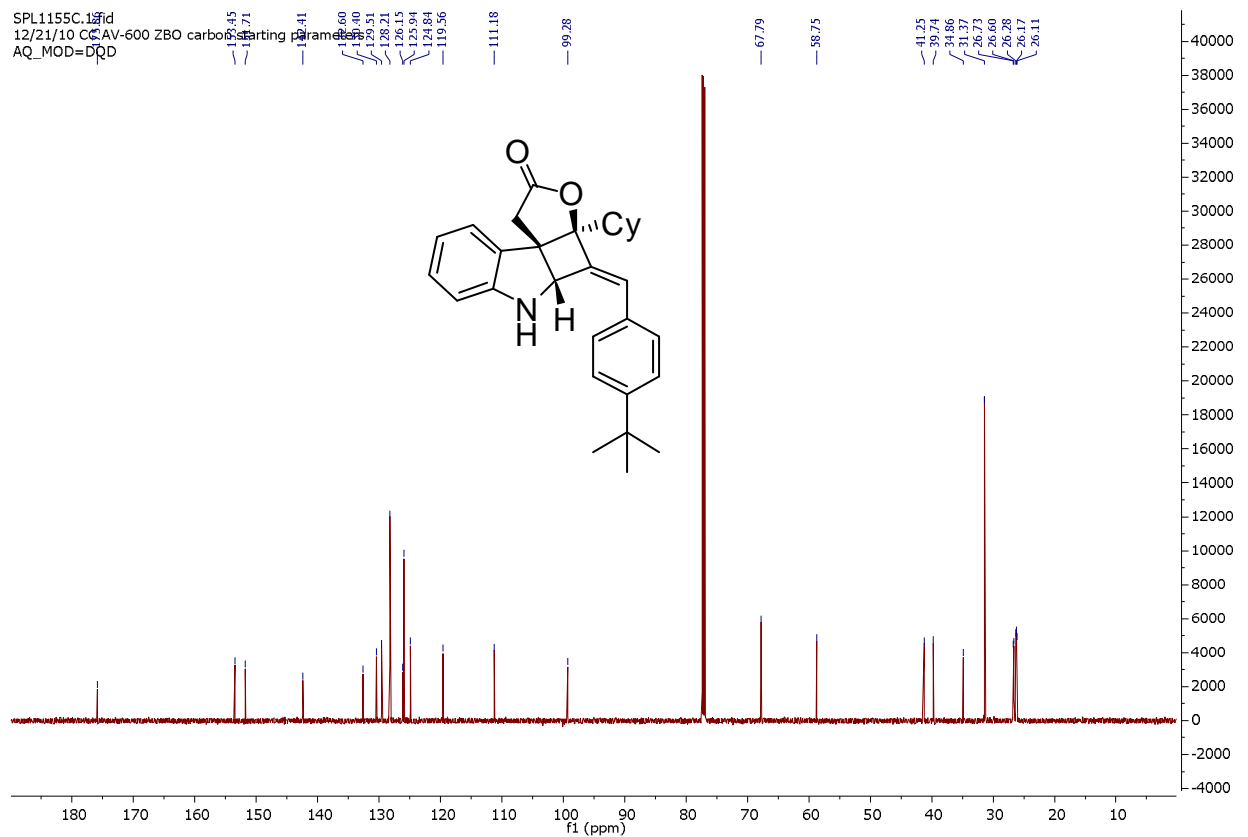

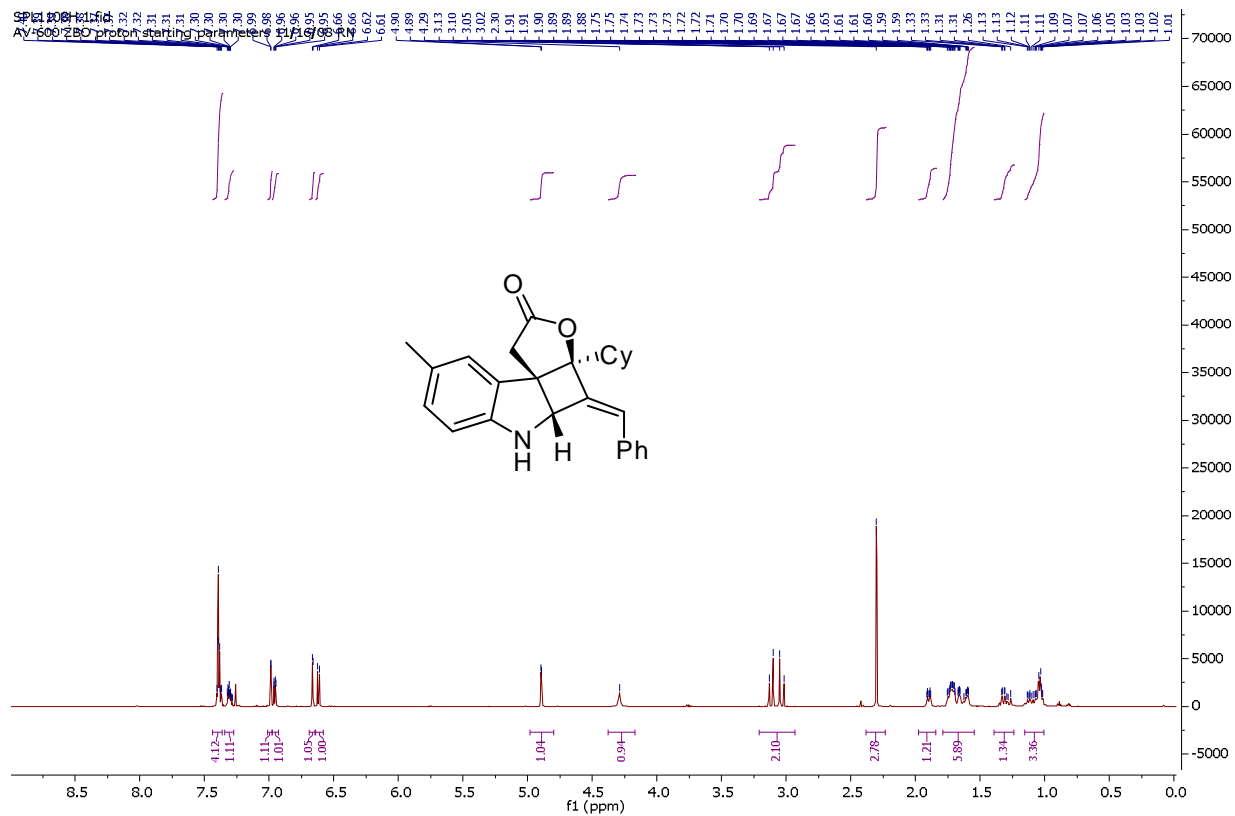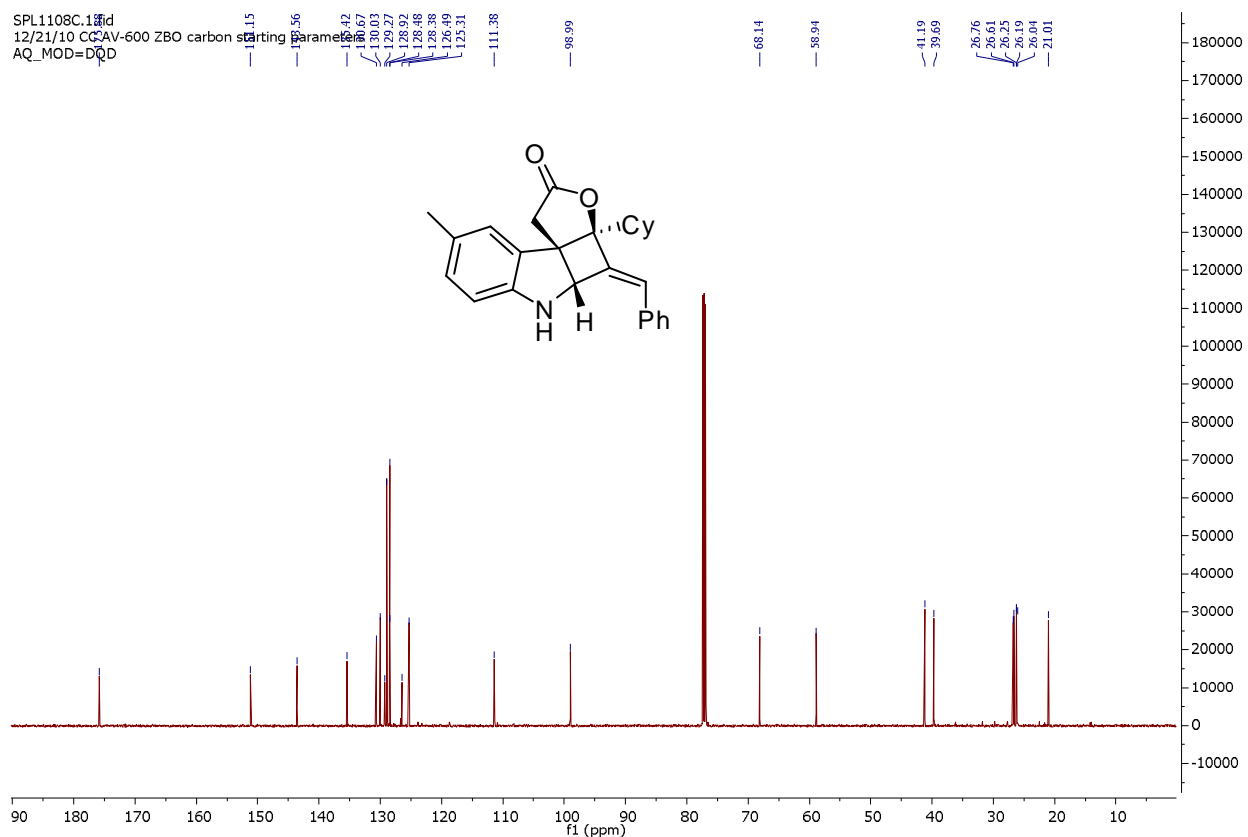

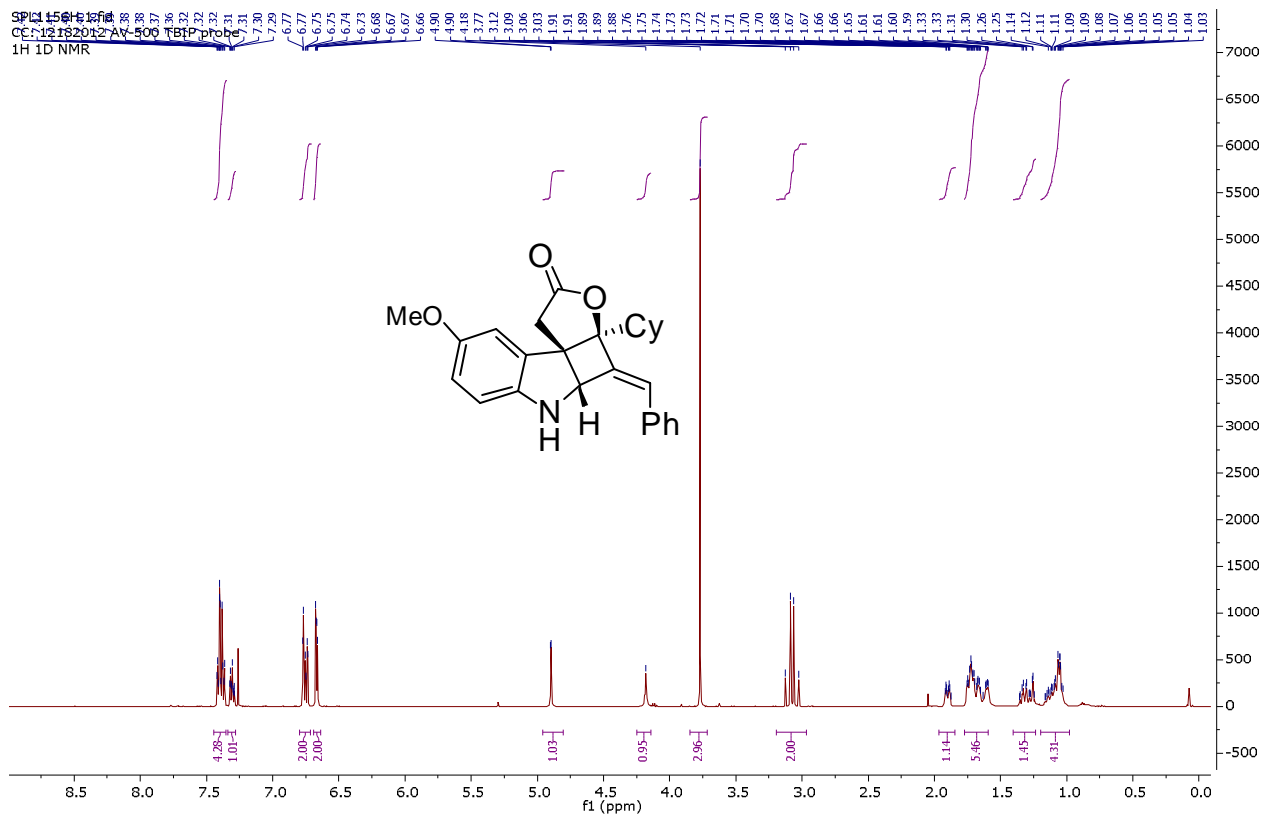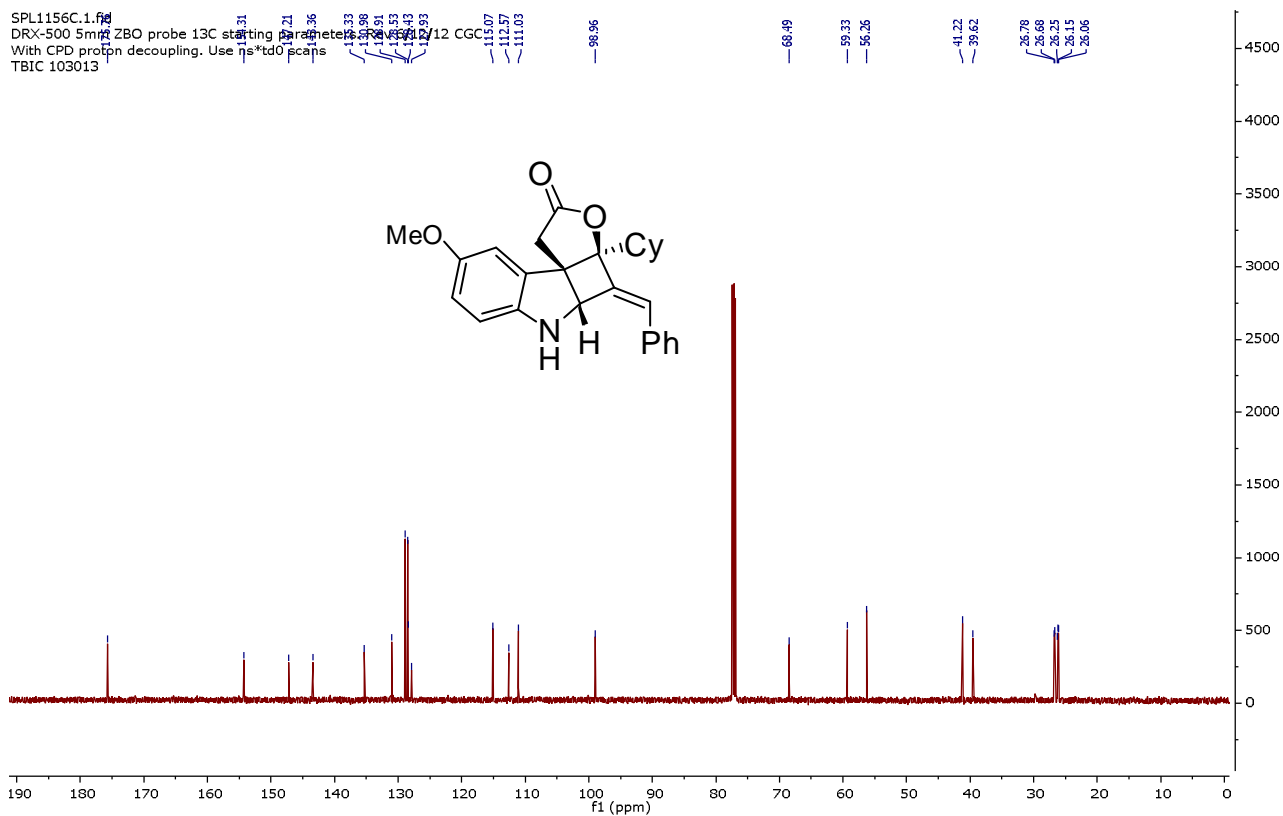

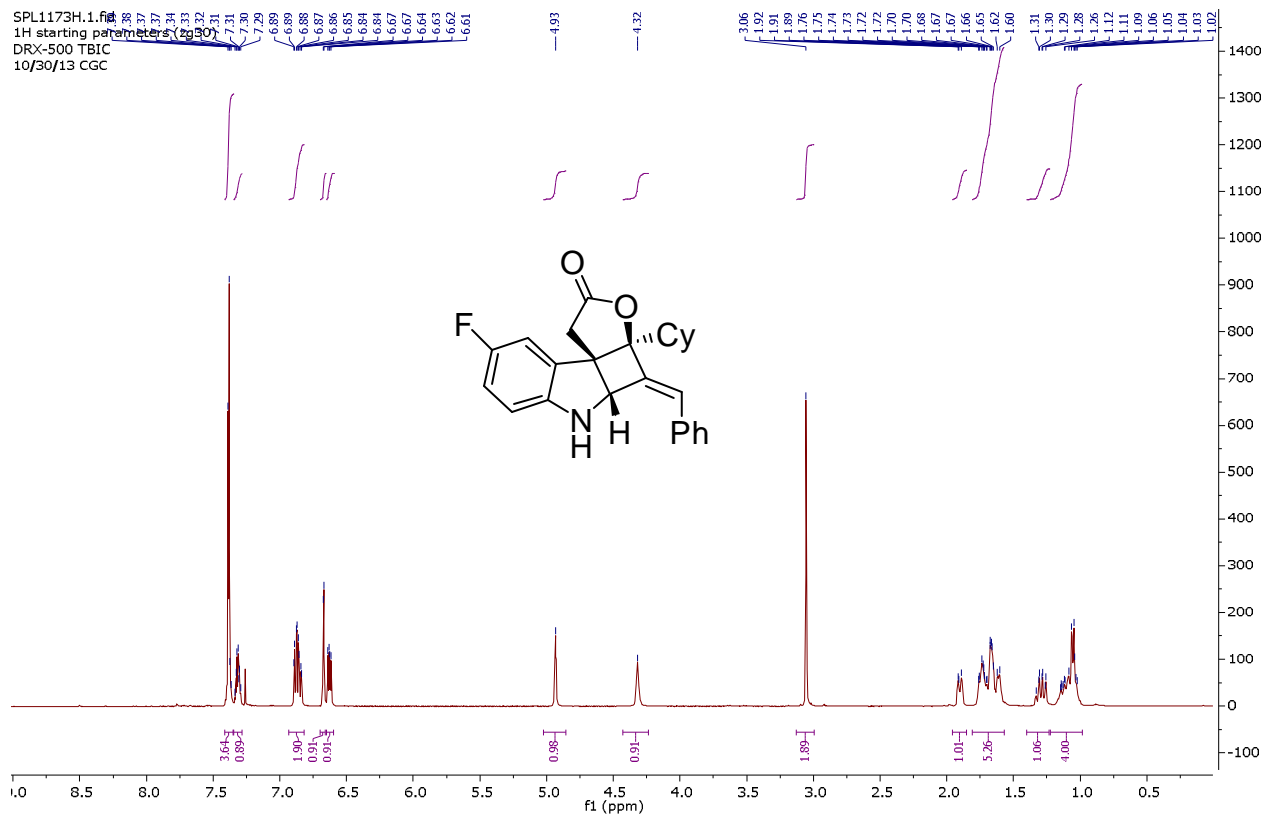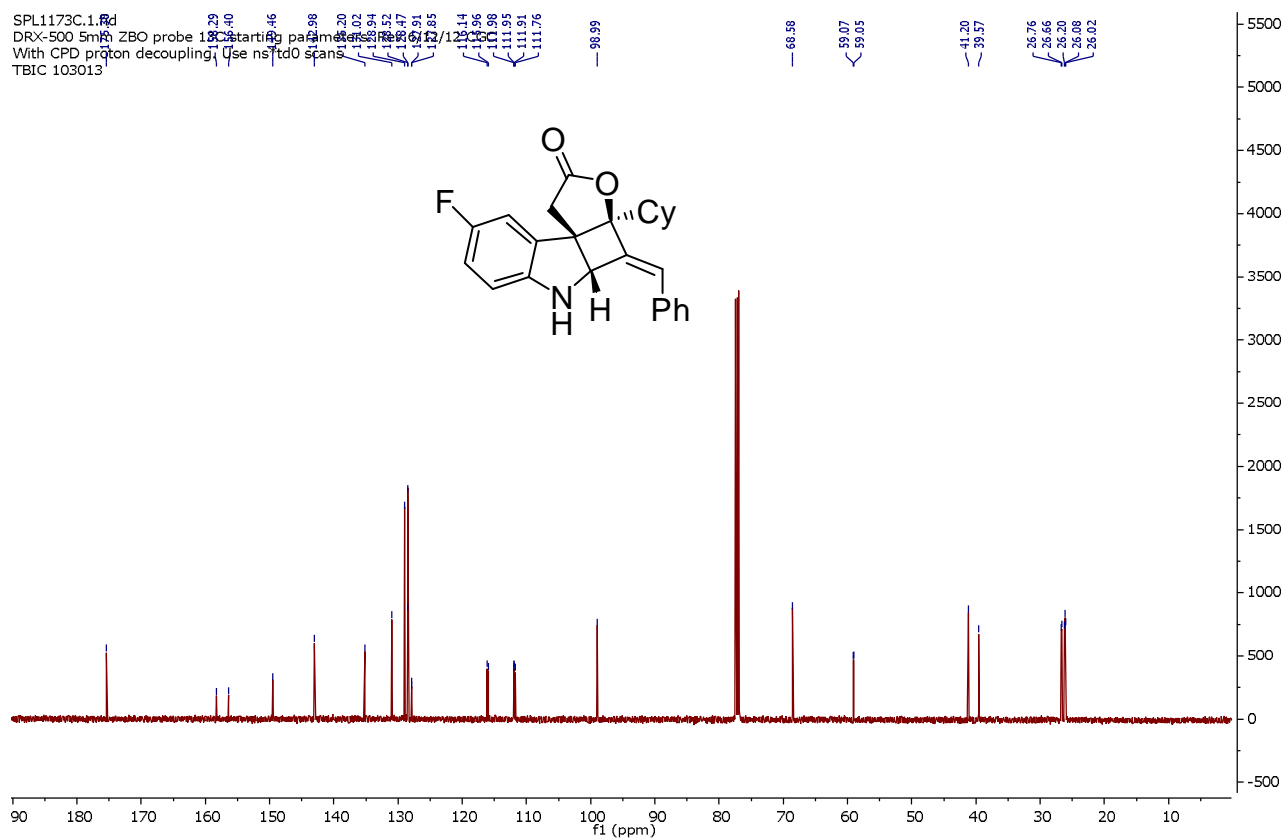

SPL1173F.1.fid  
 AVQ-400 QNP Probe 19F starting parameters. (revised P1, 2/12/04 RNS)  
 chemical shifts relative to CFCl3 at 0 ppm (062103 HvH)  
 sw 239.28 ppm; o1p 0 ppm

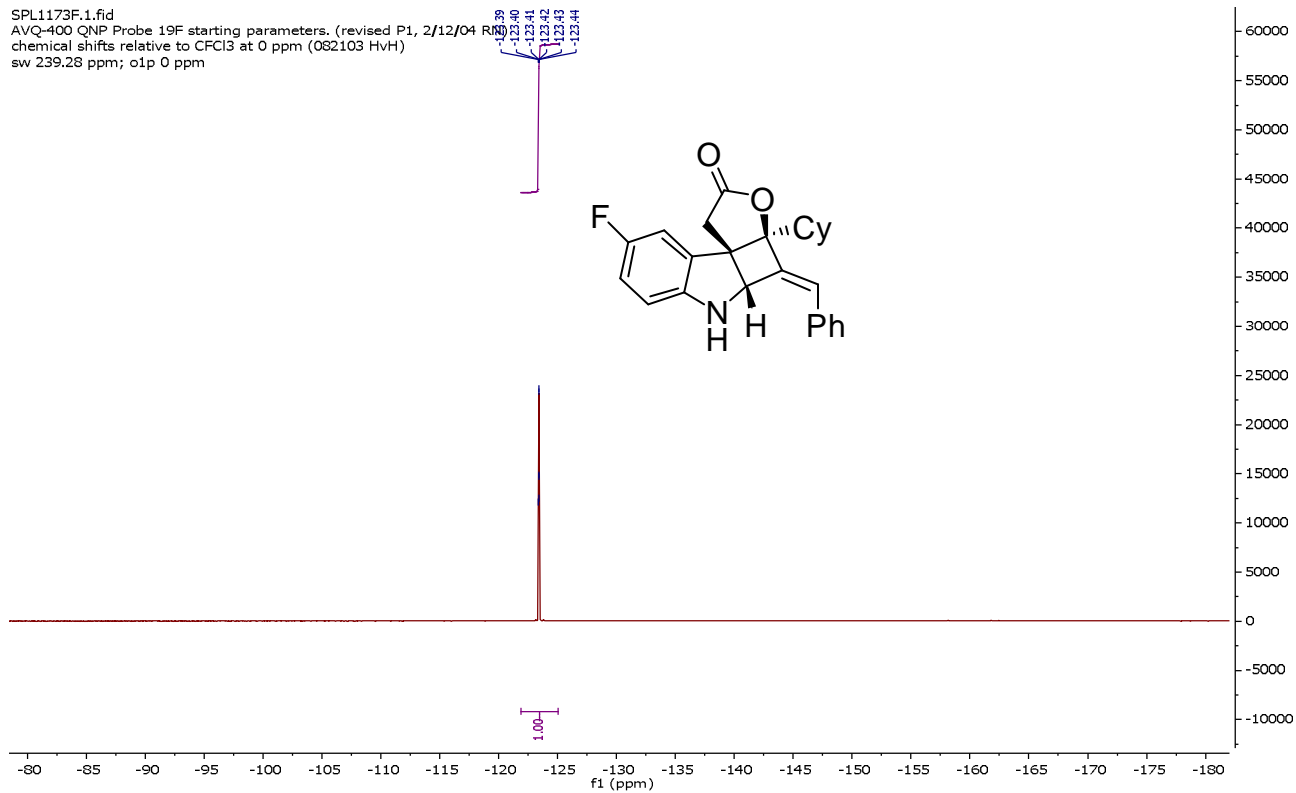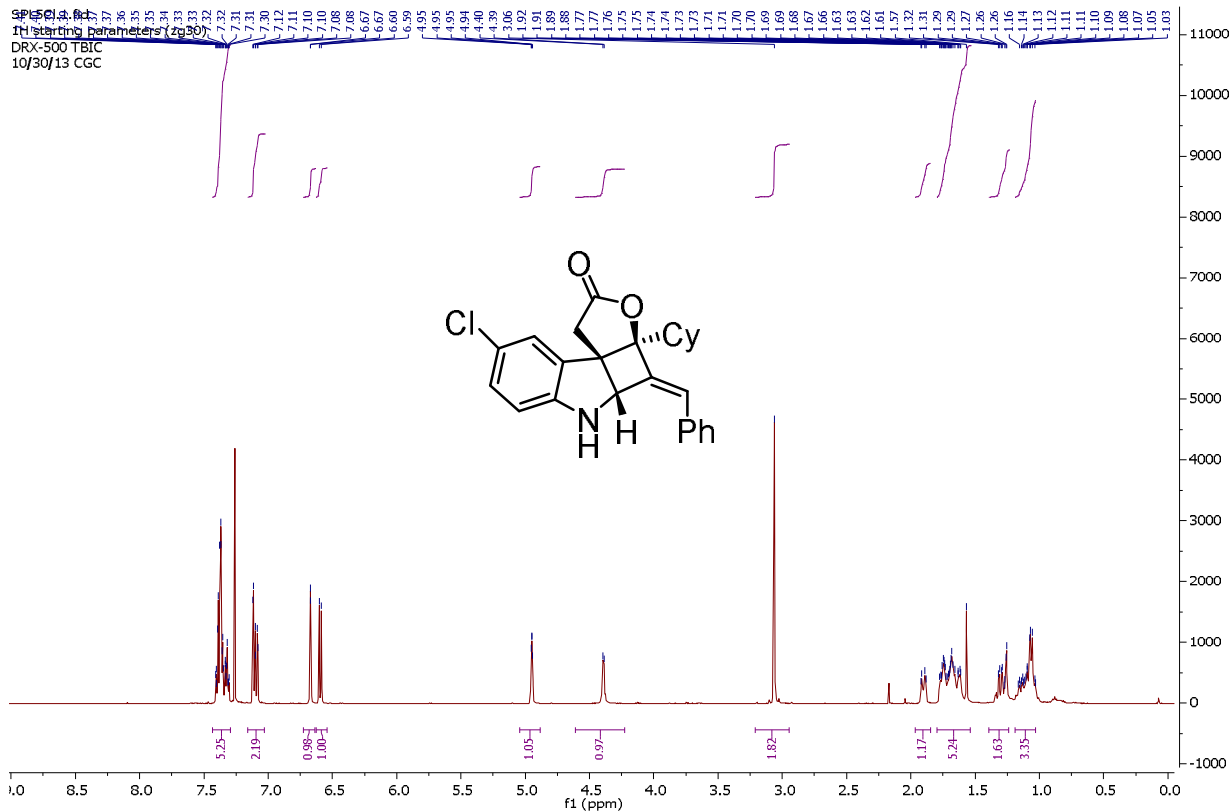





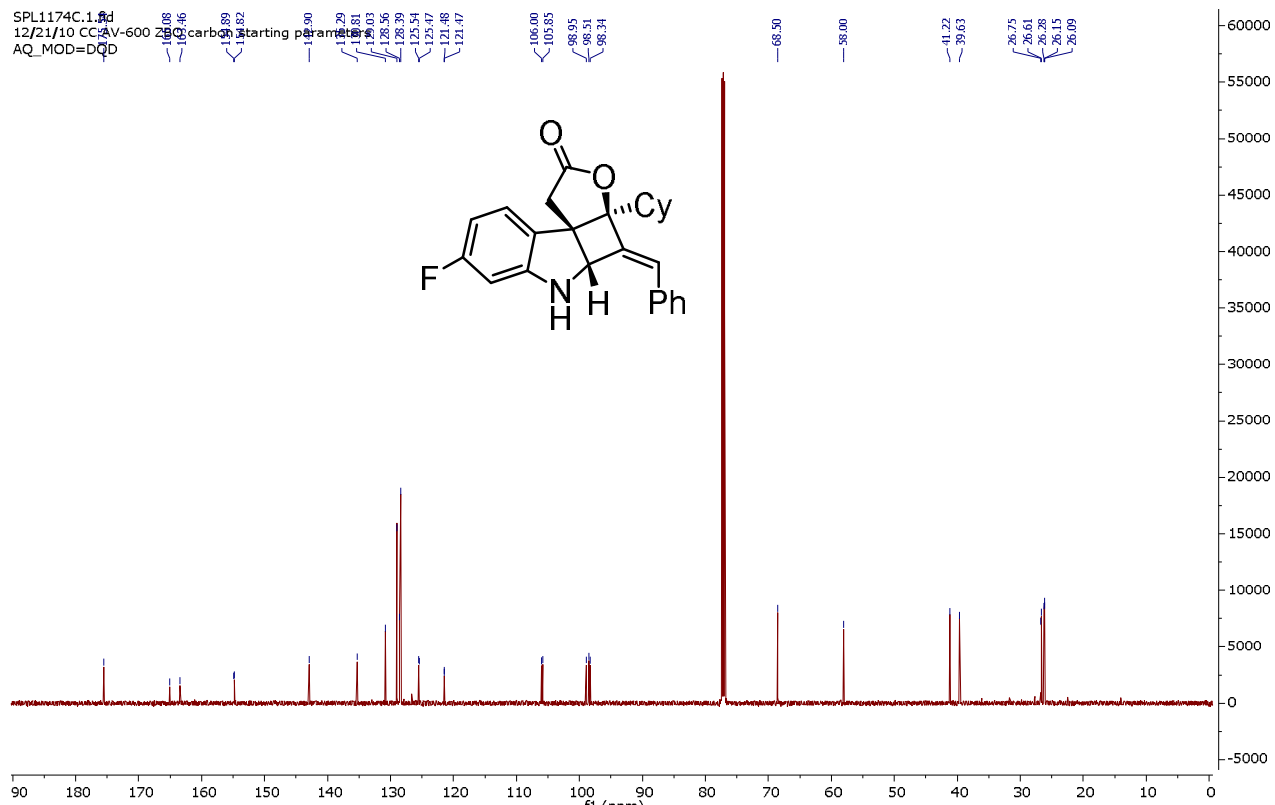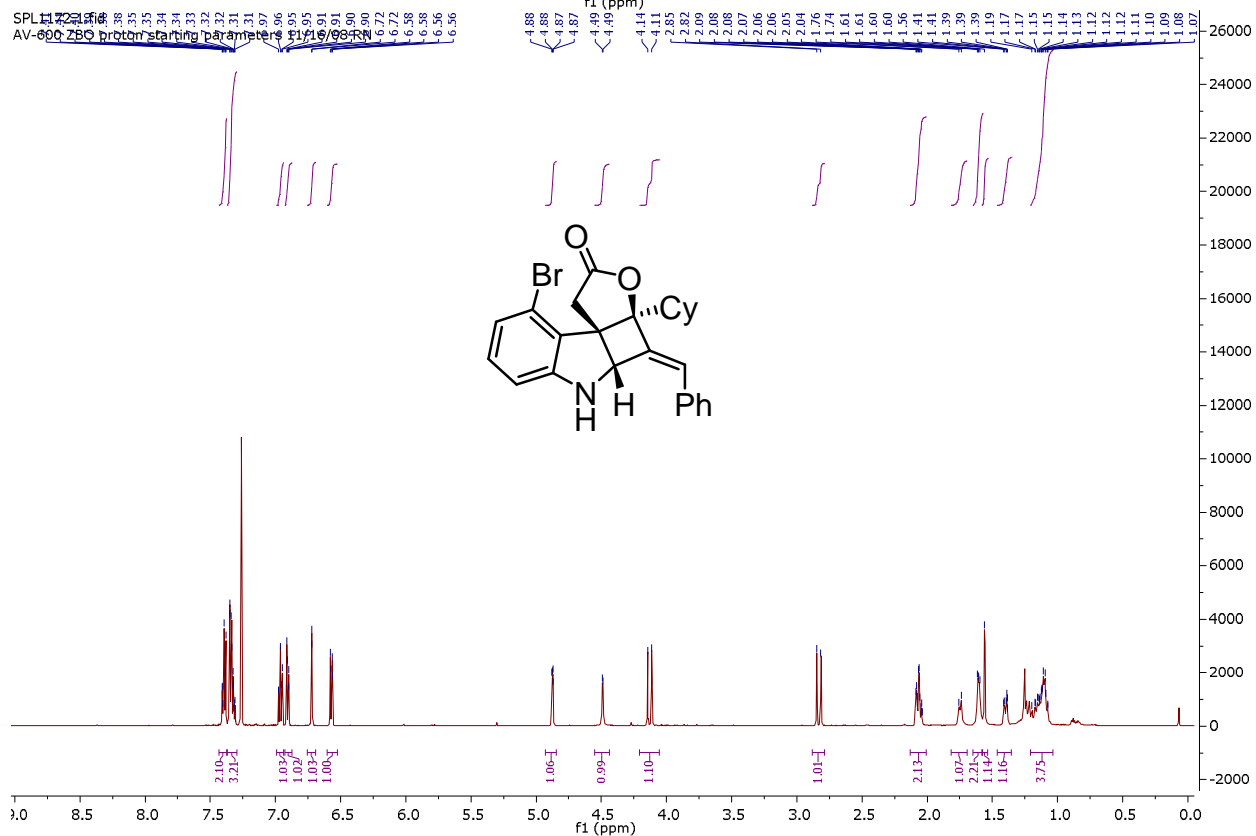



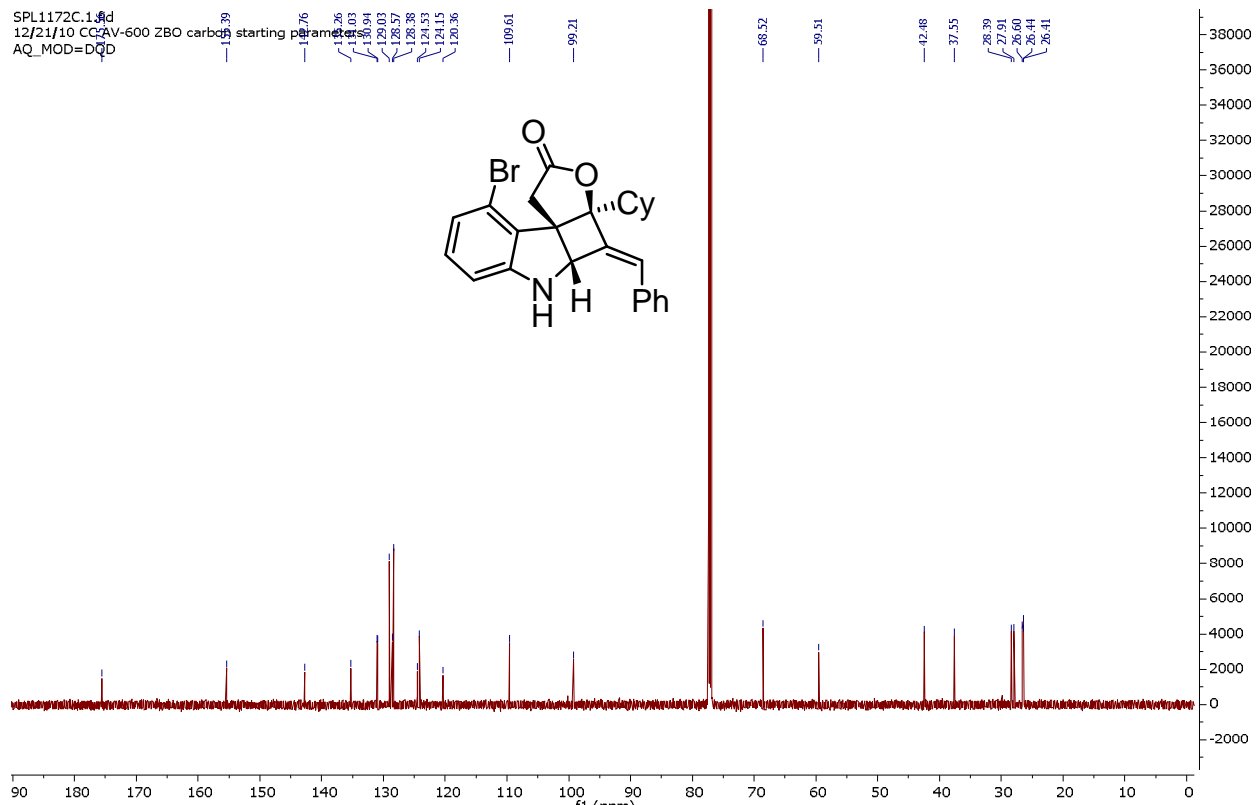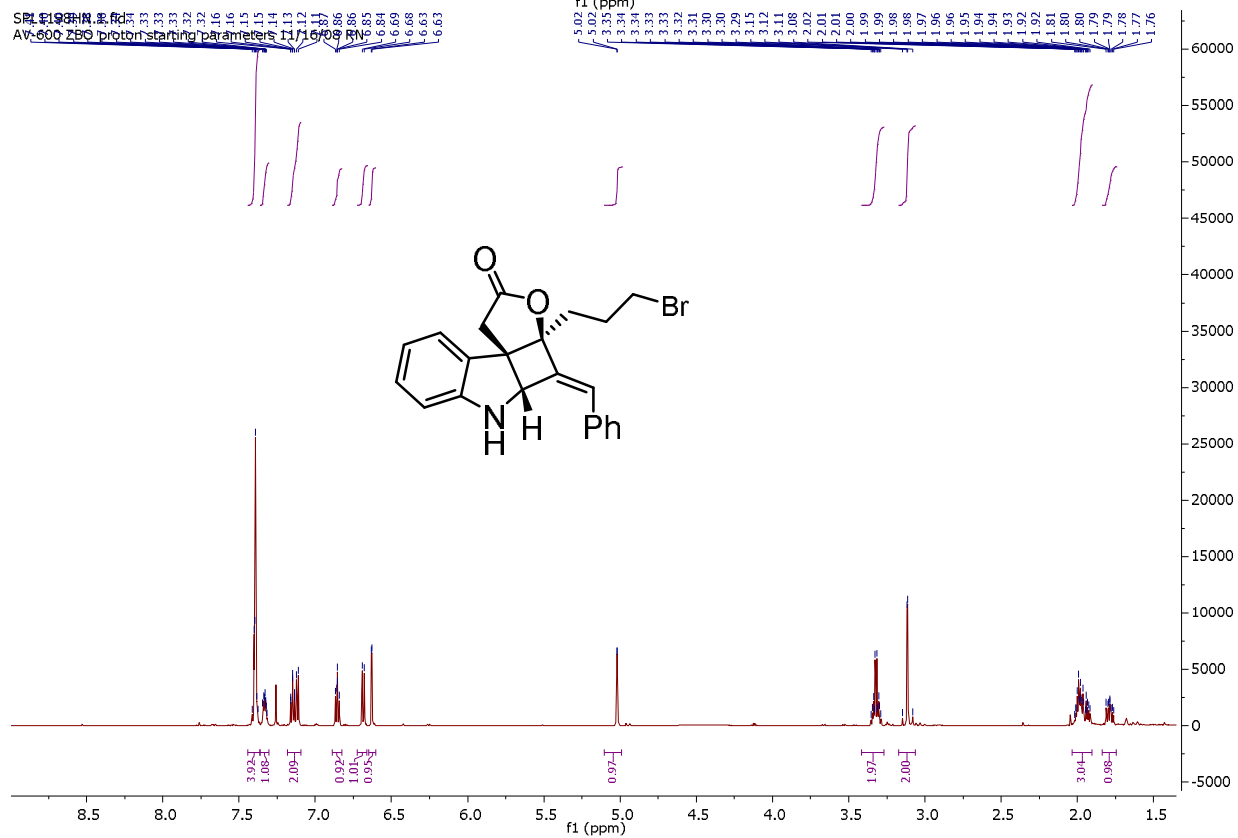

SPL1198CN.fid  
12/21/10 CC-0 AV-600 ZBO carbon  
AQ\_MOD=DD

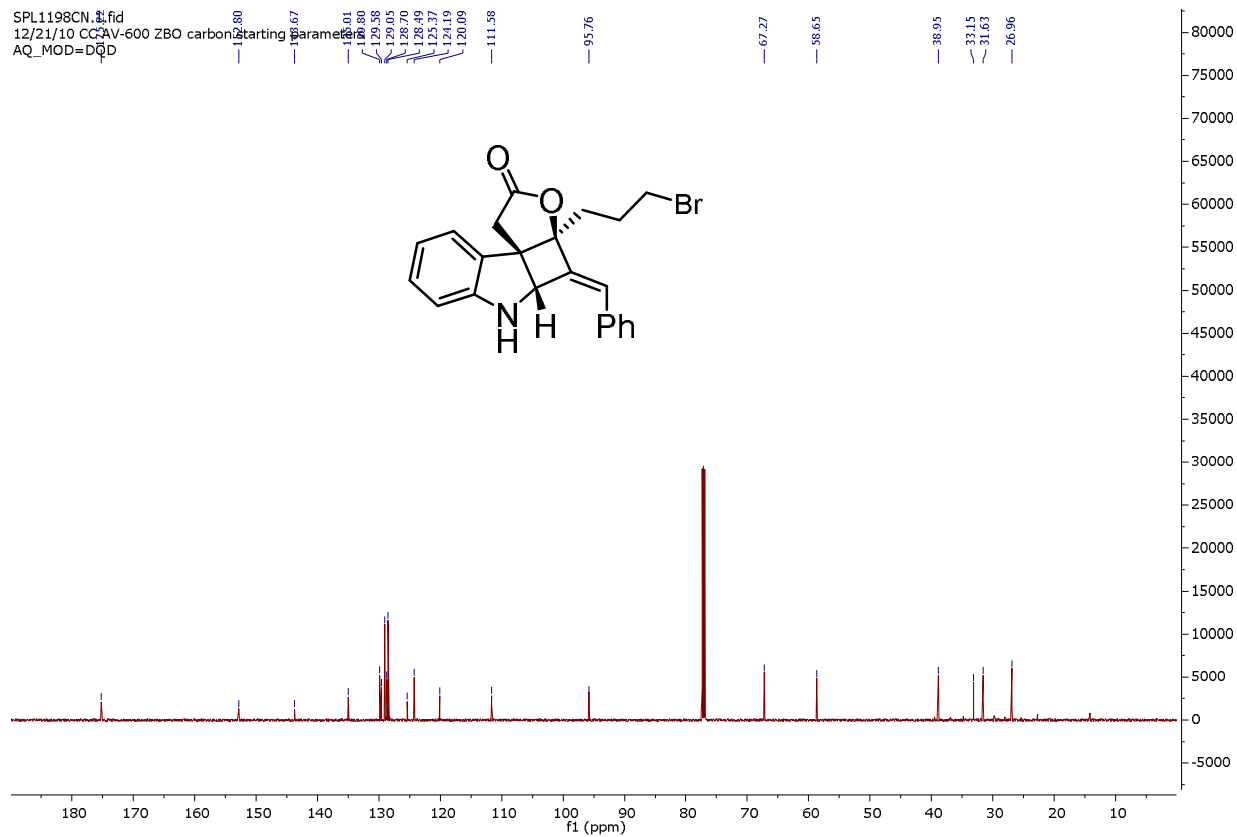

## Computed Geometry Coordinates

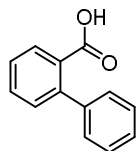

|   |             |             |             |
|---|-------------|-------------|-------------|
| C | -2.24798100 | -2.31010000 | 0.21151600  |
| C | -1.42131500 | 0.32817700  | -0.05000000 |
| C | -0.45659100 | -0.68594900 | 0.03297000  |
| C | -0.89759700 | -2.00189900 | 0.15987900  |
| H | -2.56018900 | -3.34173100 | 0.31203200  |
| H | -0.15853500 | -2.78885500 | 0.24495100  |
| C | 3.76482600  | -0.03304500 | 0.15712900  |
| C | 2.93087100  | 0.63163400  | 1.04685700  |
| C | 1.56112300  | 0.43597200  | 0.99420600  |
| C | 1.00544100  | -0.42905400 | 0.05447100  |
| C | 1.84804400  | -1.09965300 | -0.82666700 |
| C | 3.22016400  | -0.89811300 | -0.78022700 |
| H | 4.83501900  | 0.12342300  | 0.19507200  |
| H | 0.91187500  | 0.95247000  | 1.69147100  |
| H | 1.42132700  | -1.76814700 | -1.56470000 |
| C | -2.77717800 | 0.01644300  | 0.02728600  |
| H | -3.50222700 | 0.81618900  | -0.03401800 |
| C | -3.19398300 | -1.29777700 | 0.15309500  |
| H | -4.24970500 | -1.52890600 | 0.20177100  |
| H | 3.34967500  | 1.30486500  | 1.78369700  |
| H | 3.86332400  | -1.41649400 | -1.47970600 |
| C | -1.03618800 | 1.74166300  | -0.33042700 |
| O | -0.06717300 | 2.09795200  | -0.93883700 |
| O | -1.94123500 | 2.62174600  | 0.14822500  |
| H | -1.64111000 | 3.49982400  | -0.12619300 |

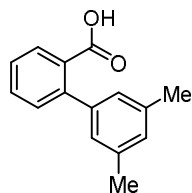

|   |             |             |             |
|---|-------------|-------------|-------------|
| C | 2.72238200  | -2.22932100 | -0.81305100 |
| C | 1.94643700  | 0.25389500  | 0.15711100  |
| C | 0.96201900  | -0.67717700 | -0.20193900 |
| C | 1.37836700  | -1.91789600 | -0.68250900 |
| H | 3.01499100  | -3.20105600 | -1.18992600 |
| H | 0.62411000  | -2.63567500 | -0.98028300 |
| C | -3.22632400 | 0.06594800  | -0.14727900 |
| C | -2.39036400 | 0.95801800  | -0.80863500 |
| C | -1.02187900 | 0.71532500  | -0.80472600 |
| C | -0.49391900 | -0.39192500 | -0.15304900 |
| C | -1.35396700 | -1.27404900 | 0.49504900  |

|   |             |             |             |
|---|-------------|-------------|-------------|
| C | -2.72485800 | -1.05201700 | 0.51253000  |
| H | -4.29685300 | 0.24377900  | -0.14780900 |
| H | -0.35714100 | 1.39458300  | -1.32866900 |
| H | -0.94256300 | -2.13693100 | 1.00712900  |
| C | 3.29644100  | -0.05337000 | 0.00026400  |
| H | 4.03664700  | 0.68426400  | 0.27822700  |
| C | 3.68815600  | -1.29218100 | -0.47781000 |
| H | 4.73941400  | -1.52390700 | -0.58501500 |
| C | -2.94300300 | 2.17344900  | -1.50090200 |
| H | -2.49422000 | 2.30249600  | -2.48656300 |
| H | -4.02320100 | 2.10269400  | -1.62282000 |
| H | -2.72801800 | 3.07433800  | -0.92229300 |
| C | -3.64634000 | -1.97982400 | 1.25538500  |
| H | -3.20488300 | -2.96974400 | 1.36685900  |
| H | -3.85281900 | -1.59399900 | 2.25620100  |
| H | -4.60108500 | -2.08438400 | 0.73968500  |
| C | 1.59096800  | 1.54534200  | 0.81382600  |
| O | 0.64229100  | 1.73825600  | 1.51987600  |
| O | 2.50239900  | 2.51060900  | 0.56503500  |
| H | 2.22340200  | 3.28731700  | 1.07041300  |

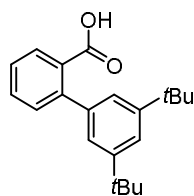

|   |             |             |             |
|---|-------------|-------------|-------------|
| C | 3.63252700  | -2.11413000 | -1.49593500 |
| C | 2.97514100  | -0.06077000 | 0.25373100  |
| C | 1.94763900  | -0.75280400 | -0.40426600 |
| C | 2.30545200  | -1.78080000 | -1.27510700 |
| H | 3.87800800  | -2.91763200 | -2.17862400 |
| H | 1.51915200  | -2.30553200 | -1.80353900 |
| C | -2.17108800 | 0.22437800  | -0.09321300 |
| C | -1.25304400 | 1.24580800  | -0.36909500 |
| C | 0.08625100  | 0.91056400  | -0.45806300 |
| C | 0.51130700  | -0.40518800 | -0.26761000 |
| C | -0.42170200 | -1.39216300 | -0.00199500 |
| C | -1.78373500 | -1.09372100 | 0.09229800  |
| H | -3.21914800 | 0.48147700  | -0.02403200 |
| H | 0.83134600  | 1.66383800  | -0.67722400 |
| H | -0.07446900 | -2.40656100 | 0.15722100  |
| C | 4.30886100  | -0.38049400 | 0.00827100  |
| H | 5.08306100  | 0.17255300  | 0.52202600  |
| C | 4.64151400  | -1.40725500 | -0.85877300 |
| H | 5.68022800  | -1.65370300 | -1.03406600 |
| C | -1.75942000 | 2.67609000  | -0.54847500 |
| C | -2.77396000 | -2.21469200 | 0.40475500  |
| C | -2.75526400 | 2.72704200  | -1.71510200 |
| H | -3.61287100 | 2.07680200  | -1.53951400 |
| H | -3.12706700 | 3.74562100  | -1.84700500 |

|   |             |             |             |
|---|-------------|-------------|-------------|
| H | -2.27678400 | 2.41166500  | -2.64416800 |
| C | -2.45995900 | 3.12692500  | 0.74090800  |
| H | -2.81860400 | 4.15309200  | 0.63308700  |
| H | -3.31704300 | 2.49464000  | 0.97602400  |
| H | -1.77007100 | 3.08721900  | 1.58575100  |
| C | -0.62453200 | 3.65697400  | -0.84163600 |
| H | 0.09849700  | 3.68526400  | -0.02393300 |
| H | -0.09717000 | 3.39965700  | -1.76211600 |
| H | -1.03522900 | 4.66100700  | -0.96104500 |
| C | -4.22002300 | -1.72066200 | 0.43682000  |
| H | -4.36969100 | -0.96538000 | 1.21056100  |
| H | -4.52165500 | -1.29784400 | -0.52362600 |
| H | -4.88385800 | -2.55857500 | 0.65674000  |
| C | -2.43919500 | -2.81504900 | 1.77713500  |
| H | -3.13465900 | -3.62384800 | 2.01272700  |
| H | -1.42734700 | -3.22063300 | 1.80074000  |
| H | -2.51511100 | -2.05566700 | 2.55732400  |
| C | -2.66362200 | -3.30630100 | -0.66859200 |
| H | -1.66175600 | -3.73563500 | -0.70345600 |
| H | -3.36834400 | -4.11359400 | -0.45699000 |
| H | -2.89184500 | -2.89988700 | -1.65580500 |
| C | 2.68113900  | 0.95378600  | 1.30730200  |
| O | 1.73678800  | 0.95004000  | 2.04528500  |
| O | 3.64364500  | 1.89795000  | 1.38664200  |
| H | 3.40324400  | 2.47250500  | 2.12737600  |

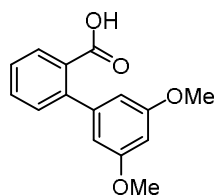

|   |             |             |             |
|---|-------------|-------------|-------------|
| C | 3.30900600  | -2.04478900 | -1.13939600 |
| C | 2.47609300  | 0.23485400  | 0.20862400  |
| C | 1.51510900  | -0.65163300 | -0.29507900 |
| C | 1.95766000  | -1.79068900 | -0.96413000 |
| H | 3.62339400  | -2.93758000 | -1.66476600 |
| H | 1.21995100  | -2.47150400 | -1.36993800 |
| C | -2.70417500 | 0.00979800  | -0.11825700 |
| C | -1.85485300 | 0.98203600  | -0.64667900 |
| C | -0.48361700 | 0.77810900  | -0.69454000 |
| C | 0.05288600  | -0.40580200 | -0.20655800 |
| C | -0.77776600 | -1.38939600 | 0.31215100  |
| C | -2.14966900 | -1.17551100 | 0.35953900  |
| H | -3.76856000 | 0.17254200  | -0.08126900 |
| H | 0.14611000  | 1.55090900  | -1.11541000 |
| C | 3.83255100  | -0.01040600 | 0.00797900  |
| H | 4.55519000  | 0.69232700  | 0.39958500  |
| C | 4.25252300  | -1.14889800 | -0.65896400 |
| H | 5.30871300  | -1.33600000 | -0.79990700 |
| H | -0.37775300 | -2.31316300 | 0.70778100  |
| O | -2.29693900 | 2.16461600  | -1.14462200 |

|   |             |             |             |
|---|-------------|-------------|-------------|
| O | -2.88758100 | -2.18185700 | 0.89309200  |
| C | -3.67923000 | 2.42889500  | -1.10436600 |
| H | -4.05249400 | 2.43448800  | -0.07637500 |
| H | -3.81288200 | 3.41535200  | -1.54066800 |
| H | -4.24186800 | 1.69608800  | -1.69009400 |
| C | -4.28234400 | -2.01051000 | 0.97968900  |
| H | -4.67255900 | -2.91805900 | 1.43294600  |
| H | -4.53913300 | -1.15269400 | 1.60761400  |
| H | -4.72914800 | -1.88073300 | -0.01024500 |
| C | 2.08820200  | 1.39510900  | 1.06268100  |
| O | 1.15643600  | 1.43152000  | 1.81459600  |
| O | 2.94967700  | 2.42746100  | 0.93975200  |
| H | 2.65403400  | 3.10709700  | 1.56202800  |

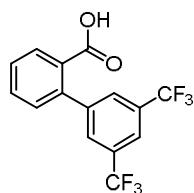

|   |             |             |             |
|---|-------------|-------------|-------------|
| C | 3.63613800  | -1.93068400 | -1.63025400 |
| C | 2.96873300  | -0.00570900 | 0.26129900  |
| C | 1.94837900  | -0.66664100 | -0.43853200 |
| C | 2.30614800  | -1.63036700 | -1.37760100 |
| H | 3.88519500  | -2.68324400 | -2.36728800 |
| H | 1.52283900  | -2.13286400 | -1.93151500 |
| C | -2.23127800 | 0.19058200  | -0.06039000 |
| C | -1.32260100 | 1.20362800  | -0.35089200 |
| C | 0.02674600  | 0.93892400  | -0.45518800 |
| C | 0.50464100  | -0.35936100 | -0.27090900 |
| C | -0.39819300 | -1.37237000 | 0.00732400  |
| C | -1.75709200 | -1.09248100 | 0.11554200  |
| H | -3.28818800 | 0.40577900  | 0.02327700  |
| H | 0.71792300  | 1.74013800  | -0.68139200 |
| H | -0.04326300 | -2.38504400 | 0.15879800  |
| C | 4.30309500  | -0.29834500 | -0.01087800 |
| H | 5.07533600  | 0.22262300  | 0.53719900  |
| C | 4.63975800  | -1.25768300 | -0.95089000 |
| H | 5.67985000  | -1.48041200 | -1.14797400 |
| C | -1.85453100 | 2.59383900  | -0.56361500 |
| C | -2.69252400 | -2.22534100 | 0.43439400  |
| F | -2.57195600 | 3.01143000  | 0.48575600  |
| F | -2.66568300 | 2.64789100  | -1.62888200 |
| F | -0.88037600 | 3.48471100  | -0.76256000 |
| F | -3.96782700 | -1.83505200 | 0.47326100  |
| F | -2.40674300 | -2.77799200 | 1.61952500  |
| F | -2.60126200 | -3.20450500 | -0.47668000 |
| C | 2.65526300  | 0.93978300  | 1.37227600  |
| O | 3.68302300  | 1.76426100  | 1.64942400  |
| H | 3.40883100  | 2.30691000  | 2.40264800  |
| O | 1.62823000  | 0.97338000  | 1.99087100  |

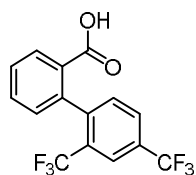

|   |             |             |             |
|---|-------------|-------------|-------------|
| C | 3.51696500  | -1.30158600 | -1.99382100 |
| C | 2.61946400  | -0.53744400 | 0.52229500  |
| C | 1.69331200  | -0.76190300 | -0.50223800 |
| C | 2.16013500  | -1.14745900 | -1.75460100 |
| H | 3.85786800  | -1.60070000 | -2.97641900 |
| H | 1.44439100  | -1.31136300 | -2.55040800 |
| C | -2.54544600 | -0.45739800 | -0.02947900 |
| C | -1.80531100 | 0.69956300  | -0.19888800 |
| C | -0.42906400 | 0.61978700  | -0.34825400 |
| C | 0.21945500  | -0.61614900 | -0.32122800 |
| C | -0.54755000 | -1.76658200 | -0.16803400 |
| C | -1.92047700 | -1.69447700 | -0.01891100 |
| C | 3.98195200  | -0.68143500 | 0.27293200  |
| H | 4.68353400  | -0.49727500 | 1.07411400  |
| C | 4.43184700  | -1.06486300 | -0.97894700 |
| H | 5.49212900  | -1.17861800 | -1.16105800 |
| H | -0.04868500 | -2.72668800 | -0.14585100 |
| C | 0.35512000  | 1.89369800  | -0.54328100 |
| C | -4.04138200 | -0.39467400 | 0.09459200  |
| F | -4.47393700 | 0.83315100  | 0.39144900  |
| F | -4.49299100 | -1.22144800 | 1.04490200  |
| F | -4.64283800 | -0.75862200 | -1.04761300 |
| F | -0.44324500 | 2.95950600  | -0.64736900 |
| F | 1.19180500  | 2.13592400  | 0.47598200  |
| F | 1.10106900  | 1.85511800  | -1.65439700 |
| H | -2.29781600 | 1.66107900  | -0.21579700 |
| H | -2.50473500 | -2.59611800 | 0.11354400  |
| C | 2.15378200  | -0.18387400 | 1.89317300  |
| O | 1.03658600  | -0.33107900 | 2.30578100  |
| O | 3.13934200  | 0.31622300  | 2.65904400  |
| H | 2.75030300  | 0.50464300  | 3.52482400  |

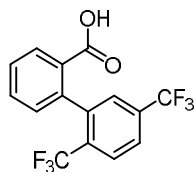

|   |             |             |             |
|---|-------------|-------------|-------------|
| C | 2.60466500  | -1.85011800 | -2.19493200 |
| C | 2.06919000  | -1.09936800 | 0.42662000  |
| C | 1.17827700  | -0.73896000 | -0.59066700 |
| C | 1.46087400  | -1.12574100 | -1.89645600 |
| H | 2.80521900  | -2.13807800 | -3.21881900 |
| H | 0.77704400  | -0.83913100 | -2.68550900 |
| C | -2.49977700 | 1.37897500  | 0.05138900  |
| C | -1.30989900 | 2.08570000  | -0.01658100 |

|   |             |             |             |
|---|-------------|-------------|-------------|
| C | -0.11098000 | 1.42015500  | -0.21902400 |
| C | -0.07823700 | 0.02896800  | -0.34599400 |
| C | -1.27792400 | -0.66674200 | -0.29518700 |
| C | -2.47494400 | 0.00345100  | -0.09720500 |
| C | 3.22171900  | -1.81864200 | 0.11921900  |
| H | 3.90106800  | -2.08405900 | 0.91655300  |
| C | 3.48958300  | -2.19646800 | -1.18522400 |
| H | 4.38526800  | -2.75881600 | -1.41272600 |
| H | -1.27089400 | -1.74389900 | -0.40258900 |
| C | 1.16357100  | 2.22238500  | -0.30878100 |
| F | 0.93224900  | 3.53695300  | -0.24805000 |
| F | 2.01479300  | 1.93334500  | 0.68464400  |
| F | 1.81473500  | 1.99432100  | -1.45662800 |
| H | -1.31409200 | 3.16161300  | 0.08142900  |
| H | -3.43730300 | 1.89489100  | 0.20479700  |
| C | -3.74976800 | -0.78898300 | 0.00274500  |
| F | -4.82136300 | -0.05508900 | -0.31435500 |
| F | -3.94409400 | -1.24959100 | 1.24447000  |
| F | -3.73822200 | -1.85215200 | -0.80891200 |
| C | 1.77698600  | -0.74661800 | 1.84513800  |
| O | 0.71795700  | -0.36821300 | 2.26405100  |
| O | 2.84371200  | -0.91158200 | 2.64787000  |
| H | 2.55745700  | -0.67221200 | 3.54061400  |

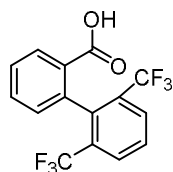

|   |             |             |             |
|---|-------------|-------------|-------------|
| C | -0.70182600 | -2.41607200 | -2.20319300 |
| C | -0.63410400 | -1.63558300 | 0.46244200  |
| C | -0.22366900 | -0.73952500 | -0.53141800 |
| C | -0.26358300 | -1.14648300 | -1.85923000 |
| H | -0.72384500 | -2.71133200 | -3.24418100 |
| H | 0.05209900  | -0.45380700 | -2.62887500 |
| C | 1.15706400  | 3.25728100  | 0.26229400  |
| C | 2.06019500  | 2.21336600  | 0.17300500  |
| C | 1.61392700  | 0.92390200  | -0.07626700 |
| C | 0.25408700  | 0.64807900  | -0.23617700 |
| C | -0.63959300 | 1.71879200  | -0.15469200 |
| C | -0.19345300 | 3.00818800  | 0.09575400  |
| C | -1.07524100 | -2.90755000 | 0.11104500  |
| H | -1.38877200 | -3.58686600 | 0.89046900  |
| C | -1.10909700 | -3.29982600 | -1.21655200 |
| H | -1.45137700 | -4.29202900 | -1.47842000 |
| C | 2.63405400  | -0.18582500 | -0.16907400 |
| F | 3.86245700  | 0.24395400  | 0.13911400  |
| F | 2.36244800  | -1.20277500 | 0.65479300  |
| F | 2.70546800  | -0.69307500 | -1.40845900 |
| H | 3.11755700  | 2.39560100  | 0.30111300  |
| H | 1.50462800  | 4.26175100  | 0.46046300  |



|   |             |             |             |
|---|-------------|-------------|-------------|
| C | -2.12262800 | 1.48825200  | -0.32172800 |
| F | -2.61223700 | 0.64637000  | 0.59646500  |
| F | -2.81660000 | 2.62585200  | -0.20954300 |
| F | -2.42044100 | 0.97412500  | -1.52215700 |
| H | -0.90810800 | 3.81584500  | 0.16250100  |
| C | -0.58628400 | -1.23855600 | 1.89720300  |
| O | -0.14866400 | -0.20369800 | 2.32045900  |
| O | -1.09339000 | -2.18054100 | 2.71337000  |
| H | -1.01470800 | -1.83595900 | 3.61391500  |

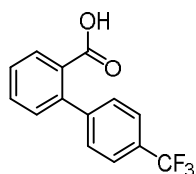

|   |             |             |             |
|---|-------------|-------------|-------------|
| C | -3.63388600 | -2.26666900 | 0.25458500  |
| C | -2.75125400 | 0.35257600  | -0.03047700 |
| C | -1.81125200 | -0.68607000 | 0.02753000  |
| C | -2.27807000 | -1.99128800 | 0.16647600  |
| H | -3.96808500 | -3.29036900 | 0.36387200  |
| H | -1.55638400 | -2.79622400 | 0.22965800  |
| C | 2.42006700  | -0.16483400 | 0.01356900  |
| C | 1.64675000  | 0.49846200  | 0.95978000  |
| C | 0.27451500  | 0.34594700  | 0.95101100  |
| C | -0.34172500 | -0.47027800 | 0.00317000  |
| C | 0.44466400  | -1.13569500 | -0.92937300 |
| C | 1.82404900  | -0.98113200 | -0.93148200 |
| H | -0.33086500 | 0.86145100  | 1.68616800  |
| H | -0.02813100 | -1.76465500 | -1.67318500 |
| C | -4.11159200 | 0.07217100  | 0.07834400  |
| H | -4.81896800 | 0.88826800  | 0.03258200  |
| C | -4.55581000 | -1.23186500 | 0.21762500  |
| H | -5.61513100 | -1.43769200 | 0.29264800  |
| H | 2.12280600  | 1.13258600  | 1.69697200  |
| H | 2.42983600  | -1.48982300 | -1.66857100 |
| C | 3.91057000  | 0.00691100  | 0.05648700  |
| F | 4.26031200  | 1.29961600  | 0.08714100  |
| F | 4.44234200  | -0.55555200 | 1.15307800  |
| F | 4.51810300  | -0.54371600 | -0.99887300 |
| C | -2.33151400 | 1.75594400  | -0.31167700 |
| O | -1.32218400 | 2.08579900  | -0.86797000 |
| O | -3.24527600 | 2.65687400  | 0.10268300  |
| H | -2.91529600 | 3.52686400  | -0.16335700 |

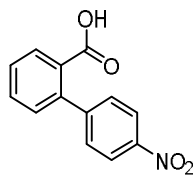

|   |             |             |             |
|---|-------------|-------------|-------------|
| C | -3.27010900 | -2.25728700 | 0.34111000  |
| C | -2.39674500 | 0.35183100  | -0.05072100 |

|   |             |             |             |
|---|-------------|-------------|-------------|
| C | -1.45385300 | -0.67970800 | 0.06105800  |
| C | -1.91456700 | -1.98018600 | 0.25146000  |
| H | -3.60095500 | -3.27675900 | 0.49193600  |
| H | -1.18998300 | -2.77844800 | 0.35365500  |
| C | 2.75013100  | -0.14761600 | 0.06173400  |
| C | 1.99264800  | 0.54199300  | 0.99283500  |
| C | 0.62054100  | 0.38083300  | 0.97363200  |
| C | 0.01488700  | -0.45820600 | 0.03961300  |
| C | 0.80778500  | -1.14505700 | -0.87593000 |
| C | 2.18413000  | -0.98929800 | -0.87634600 |
| H | 0.00797300  | 0.90958200  | 1.69280100  |
| H | 0.34004100  | -1.79296700 | -1.60612900 |
| C | -3.75646200 | 0.06984000  | 0.05726500  |
| H | -4.46749300 | 0.87907400  | -0.03185600 |
| C | -4.19569200 | -1.22913300 | 0.25078000  |
| H | -5.25469300 | -1.43656200 | 0.32553200  |
| H | 2.48069400  | 1.18546700  | 1.70986700  |
| H | 2.81569500  | -1.50351900 | -1.58572600 |
| N | 4.21440000  | 0.01951800  | 0.07341700  |
| O | 4.68745700  | 0.75185700  | 0.91224900  |
| O | 4.85385800  | -0.58694500 | -0.75562000 |
| C | -1.97548300 | 1.74237200  | -0.38780500 |
| O | -0.94788500 | 2.04868300  | -0.92427100 |
| O | -2.90635000 | 2.65641900  | -0.05099400 |
| H | -2.57198300 | 3.51513300  | -0.34702200 |

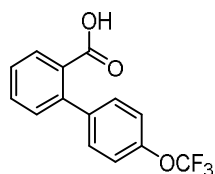

|   |             |             |             |
|---|-------------|-------------|-------------|
| C | -4.14857200 | -2.05395000 | 0.46984500  |
| C | -3.02996900 | 0.44579600  | 0.00543400  |
| C | -2.19790000 | -0.68322000 | 0.02819500  |
| C | -2.78467800 | -1.92610400 | 0.25915300  |
| H | -4.57548900 | -3.03294200 | 0.64661500  |
| H | -2.14763700 | -2.80103300 | 0.29743400  |
| C | 2.04528300  | -0.57281600 | -0.33592100 |
| C | 1.42354600  | 0.25385900  | 0.58659600  |
| C | 0.04150400  | 0.22079500  | 0.68068900  |
| C | -0.72342800 | -0.61796400 | -0.12187100 |
| C | -0.06905600 | -1.44309700 | -1.03206000 |
| C | 1.30939400  | -1.42063200 | -1.14608000 |
| H | -0.44911100 | 0.86095200  | 1.40370100  |
| H | -0.64802900 | -2.09621800 | -1.67310400 |
| C | -4.39631700 | 0.31565600  | 0.24454400  |
| H | -5.01666000 | 1.20093400  | 0.22899400  |
| C | -4.95917200 | -0.92867700 | 0.47183800  |
| H | -6.02305600 | -1.01875200 | 0.64575900  |
| H | 1.98982100  | 0.91336900  | 1.22647200  |
| H | 1.82868300  | -2.04731800 | -1.85808000 |

|   |             |             |             |
|---|-------------|-------------|-------------|
| O | 3.41876500  | -0.63994200 | -0.53594300 |
| C | 4.25981300  | 0.11819900  | 0.18672400  |
| F | 4.04866300  | 1.42516700  | 0.01877300  |
| F | 4.17909700  | -0.12993900 | 1.49627400  |
| F | 5.48871700  | -0.15731500 | -0.21021500 |
| C | -2.50639100 | 1.78842300  | -0.38160900 |
| O | -1.57338000 | 1.99554900  | -1.10496800 |
| O | -3.23628400 | 2.79267500  | 0.14668100  |
| H | -2.86395600 | 3.61591900  | -0.20030800 |

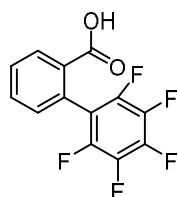

|   |             |             |             |
|---|-------------|-------------|-------------|
| C | -3.06230900 | 2.01602200  | -1.11414000 |
| C | -2.24727000 | -0.27590800 | 0.23363400  |
| C | -1.28608600 | 0.59857400  | -0.29028000 |
| C | -1.71258800 | 1.74064600  | -0.96008000 |
| H | -3.37000800 | 2.91171700  | -1.63777000 |
| H | -0.97206400 | 2.41485300  | -1.37067200 |
| C | 2.93925700  | -0.08778800 | -0.07996600 |
| C | 2.11387900  | -1.02179000 | -0.68518400 |
| C | 0.75350000  | -0.79352300 | -0.73681800 |
| C | 0.17485200  | 0.34857500  | -0.20069100 |
| C | 1.02745000  | 1.26803700  | 0.39051900  |
| C | 2.39506800  | 1.06199400  | 0.46097900  |
| C | -3.60081800 | -0.00131700 | 0.06004800  |
| H | -4.32975500 | -0.68840200 | 0.46547100  |
| C | -4.01033500 | 1.14104200  | -0.60731400 |
| H | -5.06540700 | 1.34640000  | -0.72926800 |
| F | -0.01509700 | -1.71267900 | -1.31526800 |
| F | 2.63599800  | -2.12329100 | -1.20766800 |
| F | 4.24562500  | -0.29534200 | -0.02390600 |
| F | 3.18204000  | 1.95852700  | 1.04141100  |
| F | 0.53846600  | 2.38169800  | 0.93203800  |
| C | -1.84455800 | -1.46692100 | 1.03602800  |
| O | -0.77360800 | -1.62840000 | 1.55305900  |
| O | -2.83753900 | -2.36505300 | 1.15726800  |
| H | -2.49712900 | -3.08301200 | 1.70975400  |

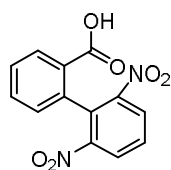

|   |             |             |             |
|---|-------------|-------------|-------------|
| C | -2.32935500 | -0.00019800 | -2.37645700 |
| C | -1.76046900 | -0.00037700 | 0.34283100  |
| C | -0.71614100 | -0.00011500 | -0.58527200 |
| C | -1.00906800 | -0.00003400 | -1.93995700 |
| H | -2.54138400 | -0.00014800 | -3.43760400 |

|   |             |             |             |
|---|-------------|-------------|-------------|
| H | -0.19913000 | 0.00018500  | -2.65908600 |
| C | 3.52154100  | 0.00098300  | 0.28314400  |
| C | 2.83575800  | 1.19407600  | 0.14544800  |
| C | 1.47277000  | 1.17139800  | -0.08861800 |
| C | 0.72616600  | 0.00015900  | -0.19840600 |
| C | 1.47348600  | -1.17065800 | -0.08887400 |
| C | 2.83648600  | -1.19250600 | 0.14521700  |
| C | -3.07454900 | -0.00051600 | -0.09865500 |
| H | -3.87274300 | -0.00074100 | 0.62978300  |
| C | -3.36227200 | -0.00042000 | -1.45703000 |
| H | -4.39105600 | -0.00053800 | -1.79114800 |
| H | 3.33658300  | 2.14920000  | 0.21430700  |
| H | 3.33790500  | -2.14732800 | 0.21391300  |
| C | -1.44885600 | -0.00068100 | 1.79560800  |
| O | -0.34204000 | -0.00101600 | 2.26406200  |
| O | -2.54852200 | -0.00061600 | 2.56657700  |
| H | -2.24489200 | -0.00099200 | 3.48510000  |
| N | 0.81769900  | 2.49010500  | -0.21218500 |
| O | -0.31256900 | 2.60139100  | 0.19465700  |
| O | 1.47725300  | 3.38040100  | -0.69933000 |
| H | 4.58342100  | 0.00128300  | 0.48361400  |
| N | 0.81922700  | -2.48975800 | -0.21268100 |
| O | 1.47963600  | -3.37979700 | -0.69914000 |
| O | -0.31127900 | -2.60161500 | 0.19333700  |

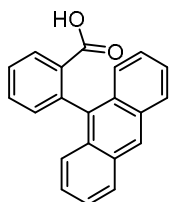

|   |             |             |             |
|---|-------------|-------------|-------------|
| C | -0.19778900 | -0.03719500 | -0.35636000 |
| C | -0.98042700 | -1.18901900 | -0.21354500 |
| C | -0.78275600 | 1.23414100  | -0.31289000 |
| C | -0.42068300 | -2.50362000 | -0.25011000 |
| C | -2.39001300 | -1.06064400 | -0.00296800 |
| C | -2.19284700 | 1.35297300  | -0.09927800 |
| C | -0.02030500 | 2.43390100  | -0.46484300 |
| C | -1.20419300 | -3.60327100 | -0.09929800 |
| H | 0.64579400  | -2.61540200 | -0.39869700 |
| C | -3.17672600 | -2.24205300 | 0.14814700  |
| C | -2.96181300 | 0.20515200  | 0.05284400  |
| C | -2.77676100 | 2.65441500  | -0.04656100 |
| H | 1.04699700  | 2.35980800  | -0.63035300 |
| C | -0.61479100 | 3.65421900  | -0.40826300 |
| C | -2.60672400 | -3.47295400 | 0.10107300  |
| H | -0.76164300 | -4.59066700 | -0.12910400 |
| H | -4.24327900 | -2.13071900 | 0.30420800  |
| H | -4.02988100 | 0.29919300  | 0.21657100  |
| C | -2.01676000 | 3.76912600  | -0.19511700 |
| H | -3.84530500 | 2.73029200  | 0.11671500  |

|   |             |             |             |
|---|-------------|-------------|-------------|
| H | -0.02053800 | 4.55138100  | -0.52528900 |
| H | -3.21358900 | -4.36160500 | 0.21753300  |
| H | -2.47120800 | 4.75048500  | -0.15128300 |
| C | 1.26630200  | -0.16459900 | -0.60799300 |
| C | 2.23718400  | -0.09958700 | 0.40015900  |
| C | 1.68892700  | -0.33779700 | -1.92336000 |
| C | 3.59002600  | -0.20242600 | 0.07636200  |
| C | 3.03448900  | -0.44535300 | -2.23969100 |
| H | 0.93951000  | -0.38734000 | -2.70373400 |
| C | 3.99062100  | -0.37668900 | -1.23672400 |
| H | 4.32375100  | -0.14571900 | 0.86770400  |
| H | 3.33513600  | -0.58040100 | -3.27085600 |
| H | 5.04274400  | -0.45790700 | -1.47515300 |
| C | 1.83657200  | 0.06818300  | 1.82698800  |
| O | 0.71712600  | 0.02709300  | 2.25320400  |
| O | 2.89582700  | 0.27304200  | 2.63882700  |
| H | 2.53869600  | 0.35610000  | 3.53404000  |

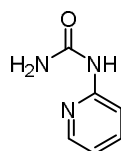

|   |             |             |             |
|---|-------------|-------------|-------------|
| C | -1.84315400 | 1.31777600  | 0.00007000  |
| C | -2.89905600 | 0.43197200  | 0.00009600  |
| C | -2.59963600 | -0.92899800 | 0.00007000  |
| C | -1.28644200 | -1.33302500 | 0.00001900  |
| C | -0.28115700 | -0.35181000 | -0.00000500 |
| H | -2.01957900 | 2.38632300  | 0.00009000  |
| H | -3.91739900 | 0.78918900  | 0.00013500  |
| H | -3.39091300 | -1.66633700 | 0.00008900  |
| N | -0.56024400 | 0.94648700  | 0.00002100  |
| C | 2.24937500  | -0.06357000 | -0.00005900 |
| N | 2.16550500  | 1.28113100  | -0.00012300 |
| H | 3.03325400  | 1.78482500  | -0.00004900 |
| H | 1.26422500  | 1.73543900  | -0.00004100 |
| O | 3.28831900  | -0.69235900 | -0.00002600 |
| N | 1.03781700  | -0.76797700 | -0.00005600 |
| H | 1.20283700  | -1.76170200 | -0.00004800 |
| H | -1.02010700 | -2.38042400 | -0.00000200 |

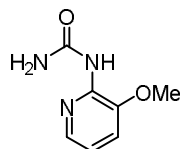

|   |             |             |             |
|---|-------------|-------------|-------------|
| C | 0.77905700  | 2.37196500  | 0.00007600  |
| C | 2.07490000  | 1.92197400  | 0.00010600  |
| C | 2.30258900  | 0.54109200  | -0.00000300 |
| C | 1.22476900  | -0.30875900 | -0.00013600 |
| C | -0.08188200 | 0.24738500  | -0.00017700 |
| H | 0.55477700  | 3.43027200  | 0.00016700  |

|   |             |             |             |
|---|-------------|-------------|-------------|
| H | 2.90059700  | 2.61724300  | 0.00021700  |
| H | 3.31128900  | 0.15535800  | 0.00003400  |
| N | -0.28131000 | 1.55052800  | -0.00006200 |
| C | -2.52111800 | -0.44013700 | 0.00002300  |
| N | -2.94076300 | 0.84145900  | 0.00006600  |
| H | -2.27247100 | 1.59781400  | 0.00006800  |
| H | -3.93314300 | 0.98871700  | 0.00029600  |
| O | -3.25593300 | -1.40674000 | 0.00025100  |
| N | -1.13574400 | -0.64169400 | -0.00034300 |
| H | -0.89224200 | -1.62002800 | -0.00050900 |
| O | 1.27858500  | -1.66324800 | -0.00028500 |
| C | 2.55849800  | -2.26211600 | 0.00028900  |
| H | 2.39328800  | -3.33454900 | 0.00028400  |
| H | 3.12064400  | -1.97775000 | -0.89158900 |
| H | 3.11987700  | -1.97765100 | 0.89261300  |

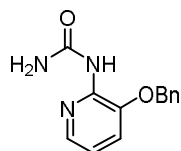

|   |             |             |             |
|---|-------------|-------------|-------------|
| C | 3.52492000  | -1.92222500 | 0.12453900  |
| C | 2.52836700  | -2.86364100 | 0.17202600  |
| C | 1.19804200  | -2.43235000 | 0.11658700  |
| C | 0.94121000  | -1.08744500 | 0.01803000  |
| C | 2.03719600  | -0.18539900 | -0.02879400 |
| H | 4.56718300  | -2.20912000 | 0.16575800  |
| H | 2.76483500  | -3.91391500 | 0.25050300  |
| H | 0.39138700  | -3.14947500 | 0.15045400  |
| N | 3.28527900  | -0.60627400 | 0.02481600  |
| C | 2.55068800  | 2.29161200  | -0.17948000 |
| N | 3.88066300  | 2.07654300  | -0.11969500 |
| H | 4.24404400  | 1.13682000  | -0.05961900 |
| H | 4.46869000  | 2.88842100  | -0.16005700 |
| O | 2.03206000  | 3.38594500  | -0.26706700 |
| N | 1.73353800  | 1.15581500  | -0.13197700 |
| H | 0.75365200  | 1.38733800  | -0.18965800 |
| O | -0.28311200 | -0.50935800 | -0.04335300 |
| C | -1.41792800 | -1.35537800 | 0.05308500  |
| H | -1.42683900 | -2.06091300 | -0.78220600 |
| H | -1.35364900 | -1.92824000 | 0.98468100  |
| C | -2.65823400 | -0.50894300 | 0.03820100  |
| C | -3.77432200 | -0.92287500 | -0.67693500 |
| C | -2.71402700 | 0.67593200  | 0.76524700  |
| C | -4.93937100 | -0.16806900 | -0.66116100 |
| H | -3.73188100 | -1.83747900 | -1.25539100 |
| C | -3.87333300 | 1.43529200  | 0.77343000  |
| H | -1.84389100 | 1.00587900  | 1.31707200  |
| C | -4.98989300 | 1.01312400  | 0.06316900  |
| H | -5.80213900 | -0.49831300 | -1.22312800 |
| H | -3.90582900 | 2.35885800  | 1.33482800  |
| H | -5.89339800 | 1.60703500  | 0.07045800  |

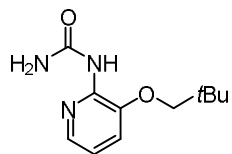

|   |             |             |             |
|---|-------------|-------------|-------------|
| C | 2.59144900  | 2.37566900  | 0.00021000  |
| C | 1.41376400  | 3.07902800  | 0.00000800  |
| C | 0.20861500  | 2.36742400  | -0.00022100 |
| C | 0.24923700  | 0.99496600  | -0.00023300 |
| C | 1.51589100  | 0.35245400  | -0.00002900 |
| H | 3.54642000  | 2.88391200  | 0.00039800  |
| H | 1.41650900  | 4.15853100  | 0.00002000  |
| H | -0.73518400 | 2.89200800  | -0.00040100 |
| N | 2.64331300  | 1.03506400  | 0.00019400  |
| C | 2.55151400  | -1.96124000 | -0.00002900 |
| N | 3.80414700  | -1.46193000 | 0.00002600  |
| H | 3.95572200  | -0.46392200 | 0.00048700  |
| H | 4.55353800  | -2.12891600 | 0.00054100  |
| O | 2.28028900  | -3.14521200 | -0.00008800 |
| N | 1.50986900  | -1.02726500 | -0.00010700 |
| H | 0.60257300  | -1.46657800 | -0.00011900 |
| O | -0.81942200 | 0.16452800  | -0.00043800 |
| C | -2.11524600 | 0.74248400  | -0.00021500 |
| H | -2.23004800 | 1.37146600  | 0.88962700  |
| H | -2.23041900 | 1.37132500  | -0.89010900 |
| C | -3.16115900 | -0.36499200 | 0.00009100  |
| C | -3.00789300 | -1.22649200 | 1.25320500  |
| H | -3.77838000 | -1.99809100 | 1.27406900  |
| H | -2.03565600 | -1.71739200 | 1.27804000  |
| H | -3.10927300 | -0.62260200 | 2.15700400  |
| C | -3.00827400 | -1.22682700 | -1.25283100 |
| H | -3.77878200 | -1.99841700 | -1.27324600 |
| H | -3.10991600 | -0.62317900 | -2.15676400 |
| H | -2.03605100 | -1.71774500 | -1.27781800 |
| C | -4.53247000 | 0.31033600  | 0.00020800  |
| H | -5.32041900 | -0.44321600 | 0.00048700  |
| H | -4.66556100 | 0.93533200  | 0.88521800  |
| H | -4.66587500 | 0.93501200  | -0.88498000 |

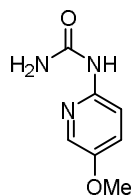

|   |             |             |             |
|---|-------------|-------------|-------------|
| C | 1.22407900  | -0.81384600 | -0.00111000 |
| C | 2.08473500  | 0.26601400  | -0.00004000 |
| C | 1.52269300  | 1.54648200  | 0.00047700  |
| C | 0.16135300  | 1.68469400  | 0.00017600  |
| C | -0.63983000 | 0.52747100  | -0.00084000 |
| H | 1.59214200  | -1.83012700 | -0.00188400 |

|   |             |             |             |
|---|-------------|-------------|-------------|
| H | 2.17886600  | 2.40610300  | 0.00129000  |
| N | -0.11056500 | -0.68116600 | -0.00153800 |
| C | -3.06897500 | -0.23707600 | 0.00032000  |
| N | -2.72413100 | -1.54113800 | 0.00128500  |
| H | -1.75230600 | -1.81217700 | -0.00081300 |
| H | -3.47688700 | -2.20432500 | -0.00010000 |
| O | -4.21295400 | 0.17305200  | 0.00082300  |
| N | -2.01971500 | 0.68601900  | -0.00094600 |
| H | -2.37050500 | 1.62990500  | -0.00172200 |
| O | 3.43897000  | 0.19185100  | 0.00054000  |
| C | 4.01156400  | -1.09833000 | 0.00065100  |
| H | 5.08745100  | -0.95512400 | 0.00104300  |
| H | 3.71825900  | -1.65807100 | 0.89206200  |
| H | 3.71889500  | -1.65795200 | -0.89104900 |
| H | -0.29688000 | 2.66408000  | 0.00085600  |

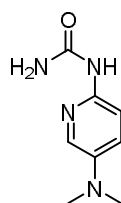

|   |             |             |             |
|---|-------------|-------------|-------------|
| C | 0.81039500  | 0.91164700  | -0.02746700 |
| C | 1.73690700  | -0.11360900 | -0.15263200 |
| C | 1.20626400  | -1.41092700 | -0.24913400 |
| C | -0.14735700 | -1.61109600 | -0.20681700 |
| C | -0.99711800 | -0.49937200 | -0.07731600 |
| H | 1.12884800  | 1.94163800  | 0.04641800  |
| H | 1.86577100  | -2.25712600 | -0.38220300 |
| N | -0.51614500 | 0.72703400  | 0.00078200  |
| C | -3.45208300 | 0.15565500  | 0.07619800  |
| N | -3.15884300 | 1.46910600  | 0.16735900  |
| H | -3.93658900 | 2.09803100  | 0.24403900  |
| H | -2.19838200 | 1.77889600  | 0.15044300  |
| O | -4.57869000 | -0.30112000 | 0.08585600  |
| N | -2.36822800 | -0.71831600 | -0.03517900 |
| H | -2.68008500 | -1.67364300 | -0.09804400 |
| H | -0.56183400 | -2.60675700 | -0.28662700 |
| N | 3.12299500  | 0.10085000  | -0.23681000 |
| C | 3.94237900  | -0.70185700 | 0.65977800  |
| H | 4.98508500  | -0.61833300 | 0.35765000  |
| H | 3.85159800  | -0.36816200 | 1.70240500  |
| H | 3.66314700  | -1.74984300 | 0.61018200  |
| C | 3.55349000  | 1.48284000  | -0.26564200 |
| H | 4.62477400  | 1.50860500  | -0.45550100 |
| H | 3.05103500  | 2.01604700  | -1.07092400 |
| H | 3.36043600  | 2.00920100  | 0.68045000  |

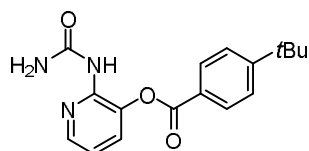



|   |             |             |             |
|---|-------------|-------------|-------------|
| C | 2.07117900  | -1.30367800 | 2.39528400  |
| C | 0.96644300  | -2.10389100 | 2.20836100  |
| C | 0.37322500  | -2.11795100 | 0.94725800  |
| C | 0.90560800  | -1.33100400 | -0.04088200 |
| C | 2.04370100  | -0.54565300 | 0.23284000  |
| H | 2.56680600  | -1.25844300 | 3.35619200  |
| H | 0.57602500  | -2.70447800 | 3.01546600  |
| H | -0.49299600 | -2.73174500 | 0.73556200  |
| N | 2.60303200  | -0.54358600 | 1.43211700  |
| O | 0.41469200  | -1.30032000 | -1.32361200 |
| C | 3.61699300  | 1.13017700  | -0.84128400 |
| N | 4.28774600  | 1.32610000  | 0.31243900  |
| H | 5.08627000  | 1.93225000  | 0.26587300  |
| H | 4.06480000  | 0.78000800  | 1.13136000  |
| O | 3.87013100  | 1.68294200  | -1.89061000 |
| N | 2.54065600  | 0.23168100  | -0.79240400 |
| H | 2.10116800  | 0.11874100  | -1.69370100 |
| C | -0.95581000 | -1.27675400 | -1.52791500 |
| O | -1.42528200 | -2.00127700 | -2.34644700 |
| C | -1.72258900 | -0.27969500 | -0.73422500 |
| C | -1.13302700 | 0.88119900  | -0.25352800 |
| C | -3.07916900 | -0.51899900 | -0.53597700 |
| C | -1.89467500 | 1.81855400  | 0.43694400  |
| H | -0.08242500 | 1.07678500  | -0.43021900 |
| C | -3.85305400 | 0.39090900  | 0.16764800  |
| H | -3.51579500 | -1.42304500 | -0.93978500 |
| C | -3.24203300 | 1.54978000  | 0.64528700  |
| H | -3.84080400 | 2.26832700  | 1.19476400  |
| C | -1.27221400 | 3.09879100  | 0.92001200  |
| H | -1.24217400 | 3.83669700  | 0.11682600  |
| H | -1.84051700 | 3.52617100  | 1.74404400  |
| H | -0.24845700 | 2.93550500  | 1.25371600  |
| C | -5.31537100 | 0.14644100  | 0.41635700  |
| H | -5.64997000 | -0.76782700 | -0.06904000 |
| H | -5.51714300 | 0.05824200  | 1.48444700  |
| H | -5.91639800 | 0.97333400  | 0.03768100  |

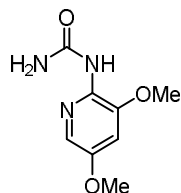

|   |             |             |             |
|---|-------------|-------------|-------------|
| C | 1.24350400  | -1.38110800 | 0.00013200  |
| C | 2.08912500  | -0.29635500 | 0.00010100  |
| C | 1.53170600  | 0.99159200  | -0.00007400 |
| C | 0.17000900  | 1.12523700  | -0.00010000 |
| C | -0.63528000 | -0.04786200 | 0.00017000  |
| H | 1.61177100  | -2.39596100 | 0.00011900  |
| H | 2.19720400  | 1.84178200  | -0.00024600 |
| N | -0.09591800 | -1.24180900 | 0.00014600  |
| C | -3.06155300 | -0.77838400 | -0.00003200 |

|   |             |             |             |
|---|-------------|-------------|-------------|
| N | -2.72088200 | -2.08465400 | 0.00024400  |
| H | -1.75034400 | -2.36030400 | 0.00016500  |
| H | -3.47602100 | -2.74500500 | -0.00014100 |
| O | -4.20479100 | -0.36683300 | -0.00034000 |
| N | -2.00712200 | 0.13679400  | 0.00018400  |
| H | -2.32751400 | 1.09234100  | 0.00012600  |
| O | -0.50584200 | 2.29696200  | -0.00048800 |
| C | 0.25724900  | 3.48730600  | 0.00027600  |
| H | -0.45507700 | 4.30573000  | 0.00047200  |
| H | 0.88387700  | 3.54469100  | 0.89246300  |
| H | 0.88428200  | 3.54559000  | -0.89157500 |
| O | 3.44463700  | -0.35353300 | 0.00028400  |
| C | 4.02912400  | -1.63841700 | -0.00036500 |
| H | 5.10376000  | -1.48551200 | -0.00154600 |
| H | 3.74110600  | -2.20028500 | 0.89127700  |
| H | 3.73907700  | -2.20019800 | -0.89143500 |

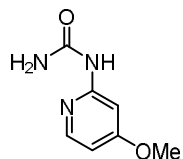

|   |             |             |             |
|---|-------------|-------------|-------------|
| C | -0.71088800 | 1.79036800  | -0.00006600 |
| C | -1.92543600 | 1.13473800  | 0.00003800  |
| C | -1.89500900 | -0.26317400 | -0.00012400 |
| C | -0.67195300 | -0.90929600 | -0.00032200 |
| C | 0.49279200  | -0.14207300 | -0.00051000 |
| H | -0.68990900 | 2.87351500  | 0.00006700  |
| N | 0.47724300  | 1.19205200  | -0.00037100 |
| C | 3.03166900  | -0.34452900 | 0.00015000  |
| N | 3.20968200  | 0.99105600  | -0.00004900 |
| H | 2.41202000  | 1.61001700  | 0.00061900  |
| H | 4.15854200  | 1.31683600  | 0.00197300  |
| O | 3.93076700  | -1.16153200 | 0.00081200  |
| N | 1.70815500  | -0.80330200 | -0.00080300 |
| H | 1.67926600  | -1.81016000 | -0.00116500 |
| H | -0.63840800 | -1.98921700 | -0.00035000 |
| H | -2.84417000 | 1.69757000  | 0.00025200  |
| O | -2.98933100 | -1.04528700 | -0.00003500 |
| C | -4.25635500 | -0.41437500 | 0.00059700  |
| H | -4.99007200 | -1.21384500 | 0.00217200  |
| H | -4.38573600 | 0.20152100  | 0.89217400  |
| H | -4.38750200 | 0.19971700  | -0.89197200 |

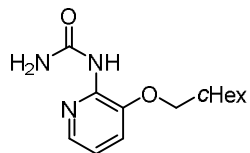

|   |            |             |            |
|---|------------|-------------|------------|
| C | 3.62814300 | -2.03595300 | 0.28016600 |
| C | 2.57645000 | -2.91655600 | 0.26863800 |
| C | 1.28167000 | -2.41109700 | 0.10486600 |

|   |             |             |             |
|---|-------------|-------------|-------------|
| C | 1.11174000  | -1.05601500 | -0.03764600 |
| C | 2.26047000  | -0.22096100 | -0.01393000 |
| H | 4.64566500  | -2.38161900 | 0.40459600  |
| H | 2.74399200  | -3.97675300 | 0.38365500  |
| H | 0.43288200  | -3.07844400 | 0.09150300  |
| N | 3.47438200  | -0.71051200 | 0.14109700  |
| C | 2.92677800  | 2.21871500  | -0.18024200 |
| N | 4.23560300  | 1.92932000  | -0.03181100 |
| H | 4.53673300  | 0.97273100  | 0.08346000  |
| H | 4.87145800  | 2.70516200  | -0.04551500 |
| O | 2.48009800  | 3.33886500  | -0.32564000 |
| N | 2.04401000  | 1.13365200  | -0.16092600 |
| H | 1.08426600  | 1.41839700  | -0.27980600 |
| O | -0.06746800 | -0.41273100 | -0.20336200 |
| C | -1.25609000 | -1.19009000 | -0.21735000 |
| H | -1.33589600 | -1.74771100 | 0.72326500  |
| H | -1.20903500 | -1.90822100 | -1.04244400 |
| C | -2.44213200 | -0.26275000 | -0.37872400 |
| C | -3.72534800 | -1.08238000 | -0.52171300 |
| C | -2.55794900 | 0.71736600  | 0.78874800  |
| H | -2.29284100 | 0.31044600  | -1.30059900 |
| C | -4.94878100 | -0.18080600 | -0.67142300 |
| H | -3.84690800 | -1.70694100 | 0.37076800  |
| H | -3.64584600 | -1.75920600 | -1.37530900 |
| C | -3.77967100 | 1.62032100  | 0.63861200  |
| H | -2.64529300 | 0.14138200  | 1.71763900  |
| H | -1.64878100 | 1.31329400  | 0.86894000  |
| C | -5.05814100 | 0.79872200  | 0.49453800  |
| H | -5.85241300 | -0.78661100 | -0.74768700 |
| H | -4.86426300 | 0.38205100  | -1.60596900 |
| H | -3.85318900 | 2.29439500  | 1.49250100  |
| H | -3.65359900 | 2.24793600  | -0.24886600 |
| H | -5.91871700 | 1.45448200  | 0.35740000  |
| H | -5.23004500 | 0.23783900  | 1.41873000  |

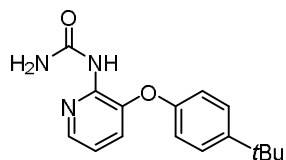

|   |             |             |             |
|---|-------------|-------------|-------------|
| C | -3.38662400 | 2.58214600  | 0.00133200  |
| C | -2.05281400 | 2.88644200  | 0.12578000  |
| C | -1.13474500 | 1.83599600  | 0.20581500  |
| C | -1.60246700 | 0.54788200  | 0.15480300  |
| C | -2.99473800 | 0.32371300  | 0.02932600  |
| H | -4.13308400 | 3.36244400  | -0.06622100 |
| H | -1.72208400 | 3.91331400  | 0.16152100  |
| H | -0.07508000 | 2.02456300  | 0.30563100  |
| N | -3.85063400 | 1.32638600  | -0.04481000 |
| C | -4.69737500 | -1.54736000 | -0.12344200 |
| N | -5.72618800 | -0.67978200 | -0.21188700 |
| H | -5.55847600 | 0.31534200  | -0.19527400 |

|   |             |             |             |
|---|-------------|-------------|-------------|
| H | -6.64327200 | -1.07847300 | -0.29253600 |
| O | -4.81155000 | -2.75601200 | -0.13615000 |
| N | -3.41892100 | -0.98814800 | -0.00995800 |
| H | -2.69928800 | -1.69174700 | 0.05232800  |
| O | -0.83302000 | -0.57928100 | 0.23913600  |
| C | 0.54339100  | -0.43882800 | 0.16557400  |
| C | 1.29815000  | -0.61078400 | 1.30608100  |
| C | 1.14992300  | -0.17325000 | -1.05246700 |
| C | 2.68434600  | -0.51954200 | 1.22690800  |
| H | 0.80269800  | -0.82118500 | 2.24377500  |
| C | 2.52837400  | -0.08121900 | -1.11200900 |
| H | 0.53896200  | -0.04517100 | -1.93605800 |
| C | 3.32754800  | -0.25183400 | 0.02308500  |
| H | 3.25723900  | -0.66319600 | 2.13091200  |
| H | 2.99085500  | 0.12166100  | -2.06892800 |
| C | 4.84588300  | -0.14622000 | -0.10147900 |
| C | 5.21772000  | 1.24661500  | -0.62873900 |
| H | 6.30142500  | 1.33260600  | -0.72304700 |
| H | 4.77986100  | 1.43544200  | -1.60863000 |
| H | 4.86932900  | 2.02293200  | 0.05357400  |
| C | 5.34989800  | -1.21255000 | -1.08402000 |
| H | 6.43483900  | -1.14740400 | -1.18095400 |
| H | 5.09496500  | -2.21258900 | -0.73159900 |
| H | 4.91575700  | -1.08251000 | -2.07504900 |
| C | 5.54910900  | -0.35616300 | 1.23896200  |
| H | 5.24626300  | 0.39206100  | 1.97271100  |
| H | 5.34558600  | -1.34643000 | 1.64844400  |
| H | 6.62680000  | -0.26877000 | 1.09903300  |

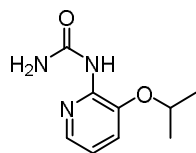

|   |             |             |             |
|---|-------------|-------------|-------------|
| C | 1.04422400  | 2.68741700  | -0.06727900 |
| C | -0.30700100 | 2.90749400  | -0.15502100 |
| C | -1.16472800 | 1.80283600  | -0.19066900 |
| C | -0.62820700 | 0.53905300  | -0.13998700 |
| C | 0.78446000  | 0.41031900  | -0.05001100 |
| H | 1.74470300  | 3.51118200  | -0.03417800 |
| H | -0.70110400 | 3.91181100  | -0.19246400 |
| H | -2.23238700 | 1.95063600  | -0.25368700 |
| N | 1.58149300  | 1.46017900  | -0.01575800 |
| C | 2.59818300  | -1.35504500 | 0.08220000  |
| N | 3.57670300  | -0.42806600 | 0.13065300  |
| H | 3.34984500  | 0.55512700  | 0.10340700  |
| H | 4.51746600  | -0.77129300 | 0.19038700  |
| O | 2.78402700  | -2.55513400 | 0.10813000  |
| N | 1.28760600  | -0.87329300 | -0.00305700 |
| H | 0.60739900  | -1.61649900 | -0.03744000 |
| O | -1.30708000 | -0.63250500 | -0.18518400 |
| C | -2.73916600 | -0.62045700 | -0.19778600 |

|   |             |             |             |
|---|-------------|-------------|-------------|
| H | -3.06949300 | 0.13077600  | -0.92027900 |
| C | -3.27736900 | -0.30622700 | 1.18750000  |
| H | -2.90774300 | 0.64697900  | 1.56128400  |
| H | -4.36611500 | -0.26869600 | 1.16468300  |
| H | -2.97173800 | -1.08866500 | 1.88213400  |
| C | -3.16120400 | -1.99304600 | -0.67770600 |
| H | -4.24776500 | -2.05552000 | -0.71950200 |
| H | -2.75870400 | -2.19506600 | -1.66836300 |
| H | -2.79570100 | -2.75546800 | 0.01013800  |

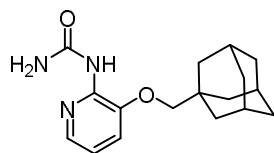

|   |             |             |             |
|---|-------------|-------------|-------------|
| C | -4.46967600 | -1.87185900 | -0.00910000 |
| C | -3.50601900 | -2.84828000 | -0.01563200 |
| C | -2.16079500 | -2.46271100 | 0.00239500  |
| C | -1.85608200 | -1.12398100 | 0.03026200  |
| C | -2.92091800 | -0.18437400 | 0.02919500  |
| H | -5.52169100 | -2.12421800 | -0.02239900 |
| H | -3.77991400 | -3.89247000 | -0.03459800 |
| H | -1.37799100 | -3.20671300 | -0.00466900 |
| N | -4.18350800 | -0.56123700 | 0.01123600  |
| C | -3.33985200 | 2.31497900  | -0.00255900 |
| N | -4.67738600 | 2.14632300  | -0.03648900 |
| H | -5.07408000 | 1.21802200  | -0.03264800 |
| H | -5.23435300 | 2.97944200  | -0.08178200 |
| O | -2.77940000 | 3.39270800  | -0.01010200 |
| N | -2.56797800 | 1.14960300  | 0.04536100  |
| H | -1.57923900 | 1.34523100  | 0.05922800  |
| O | -0.61540500 | -0.58638300 | 0.05788900  |
| C | 0.49890700  | -1.45935500 | -0.05566400 |
| H | 0.49022700  | -2.17255400 | 0.77675000  |
| H | 0.42111600  | -2.01747500 | -0.99625700 |
| C | 1.77761700  | -0.64425600 | -0.02711900 |
| C | 1.93463200  | 0.07723500  | 1.31974000  |
| C | 2.96327600  | -1.60200800 | -0.21787700 |
| C | 1.79483100  | 0.39555900  | -1.15803500 |
| H | 1.91720200  | -0.65878300 | 2.13037200  |
| H | 1.09167300  | 0.75432000  | 1.47563600  |
| C | 3.25199000  | 0.85842600  | 1.34769200  |
| H | 2.85963200  | -2.12948100 | -1.17142300 |
| H | 2.95870400  | -2.35608800 | 0.57601500  |
| C | 4.28373700  | -0.82464500 | -0.19296500 |
| H | 0.95152200  | 1.08009100  | -1.04553500 |
| H | 1.67615700  | -0.11122000 | -2.12141900 |
| C | 3.11133200  | 1.17831600  | -1.13224000 |
| H | 3.34953600  | 1.36582100  | 2.30898300  |
| C | 4.42493400  | -0.10826900 | 1.15438200  |
| C | 3.25126800  | 1.89314800  | 0.21636600  |
| H | 5.11311300  | -1.52081700 | -0.32958000 |

|   |            |             |             |
|---|------------|-------------|-------------|
| C | 4.28420700 | 0.21183800  | -1.32282900 |
| H | 3.10722200 | 1.91372800  | -1.93855300 |
| H | 4.44449100 | -0.83951800 | 1.96709400  |
| H | 5.36985500 | 0.43995400  | 1.18698500  |
| H | 2.42759000 | 2.59812800  | 0.35342900  |
| H | 4.18016700 | 2.46862300  | 0.23710200  |
| H | 5.22765000 | 0.76344100  | -1.32086400 |
| H | 4.20162800 | -0.28944600 | -2.29098400 |

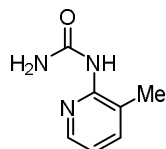

|   |             |             |             |
|---|-------------|-------------|-------------|
| C | -1.56999700 | -1.79667700 | -0.00012000 |
| C | -2.71170100 | -1.02775700 | -0.00011500 |
| C | -2.55687500 | 0.35645100  | -0.00002300 |
| C | -1.30242700 | 0.92565700  | 0.00006100  |
| C | -0.20103400 | 0.03875900  | 0.00007000  |
| H | -1.62662500 | -2.87798900 | -0.00020000 |
| H | -3.68833100 | -1.48733800 | -0.00018700 |
| H | -3.42672000 | 1.00169300  | -0.00003500 |
| N | -0.33881100 | -1.28052600 | -0.00002300 |
| C | 2.34754800  | 0.00114700  | -0.00003400 |
| N | 2.39825300  | -1.34461100 | 0.00034500  |
| H | 3.31163500  | -1.75985900 | 0.00023100  |
| H | 1.54451100  | -1.88367600 | 0.00017200  |
| O | 3.31911500  | 0.73052800  | -0.00039600 |
| N | 1.07199000  | 0.58392100  | 0.00012200  |
| H | 1.14627500  | 1.58758600  | 0.00018000  |
| C | -1.10193800 | 2.41189600  | 0.00009400  |
| H | -0.54715900 | 2.74087400  | 0.88181800  |
| H | -0.54738300 | 2.74091700  | -0.88175400 |
| H | -2.06060900 | 2.92522800  | 0.00023600  |

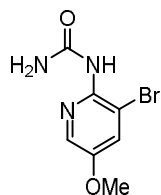

|   |             |             |             |
|---|-------------|-------------|-------------|
| C | 1.71338400  | -1.44555100 | -0.00002800 |
| C | 2.34320100  | -0.21620800 | 0.00004900  |
| C | 1.53746400  | 0.92422400  | 0.00009700  |
| C | 0.17592100  | 0.78421000  | 0.00002900  |
| C | -0.39943600 | -0.50749700 | -0.00005900 |
| H | 2.27241800  | -2.37032800 | -0.00006500 |
| H | 1.99987700  | 1.90092000  | 0.00014600  |
| N | 0.38191200  | -1.57204700 | -0.00006300 |
| C | -2.59206000 | -1.78827300 | -0.00004100 |
| N | -1.97158700 | -2.98546900 | 0.00051300  |
| H | -0.96504200 | -3.04103500 | 0.00063200  |

|    |             |             |             |
|----|-------------|-------------|-------------|
| H  | -2.56328200 | -3.79574000 | 0.00060000  |
| O  | -3.79629100 | -1.63779800 | -0.00031700 |
| N  | -1.77261600 | -0.65139600 | -0.00046700 |
| H  | -2.32338000 | 0.19293900  | 0.00048900  |
| O  | 3.68194900  | -0.01465500 | 0.00006900  |
| C  | 4.50430100  | -1.16353500 | -0.00016100 |
| H  | 5.52841200  | -0.80464600 | -0.00082500 |
| H  | 4.33075400  | -1.76970600 | 0.89197800  |
| H  | 4.32967800  | -1.77002500 | -0.89189500 |
| Br | -0.91015200 | 2.33186900  | 0.00004900  |

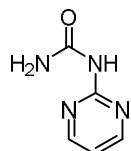

|   |             |             |             |
|---|-------------|-------------|-------------|
| C | 1.87032300  | 1.29561900  | -0.00013500 |
| C | 2.88209500  | 0.35710600  | 0.00018200  |
| C | 2.47452900  | -0.97104400 | 0.00026200  |
| C | 0.30355000  | -0.33811400 | -0.00020800 |
| H | 2.08860200  | 2.35686700  | -0.00023900 |
| N | 0.58168100  | 0.96603400  | -0.00030900 |
| C | -2.22328900 | -0.06955100 | -0.00000500 |
| N | -2.15622000 | 1.27676100  | 0.00037700  |
| H | -3.03091400 | 1.76841000  | 0.00039700  |
| H | -1.26536700 | 1.74843300  | -0.00017100 |
| O | -3.25307500 | -0.70938300 | 0.00013700  |
| N | -1.00173100 | -0.76068100 | -0.00047700 |
| H | -1.12239900 | -1.76229300 | -0.00001600 |
| H | 3.92318900  | 0.63711100  | 0.00035200  |
| H | 3.19850600  | -1.77775800 | 0.00050200  |
| N | 1.20337500  | -1.33065800 | 0.00005200  |

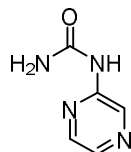

|   |             |             |             |
|---|-------------|-------------|-------------|
| C | 1.87799200  | 1.28460400  | 0.00013800  |
| C | 2.87563100  | 0.33496100  | -0.00004700 |
| C | 0.28758400  | -0.33127200 | -0.00004200 |
| H | 2.11159100  | 2.34131900  | 0.00030700  |
| N | 0.58255500  | 0.95937300  | 0.00013900  |
| C | -2.23953700 | -0.05934300 | -0.00005400 |
| N | -2.15935600 | 1.28561000  | -0.00022300 |
| H | -3.02940500 | 1.78589400  | 0.00014400  |
| H | -1.26475100 | 1.75046300  | -0.00015700 |
| O | -3.27344100 | -0.69266700 | 0.00023900  |
| N | -1.02196800 | -0.75896200 | -0.00023300 |
| H | -1.17917300 | -1.75474000 | 0.00020300  |
| H | 3.92030100  | 0.61177600  | -0.00018600 |
| N | 2.58127000  | -0.97127100 | -0.00002800 |

|   |            |             |            |
|---|------------|-------------|------------|
| C | 1.31291300 | -1.30208100 | 0.00003300 |
| H | 1.06396100 | -2.35784300 | 0.00003300 |

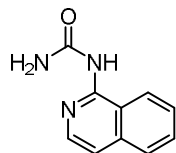

|   |             |             |             |
|---|-------------|-------------|-------------|
| C | 2.97760400  | -0.59818300 | 0.00003700  |
| N | 3.47077200  | 0.65308000  | -0.00039300 |
| H | 4.47002800  | 0.74339200  | 0.00041600  |
| H | 2.84000300  | 1.44209900  | 0.00003600  |
| O | 3.64743800  | -1.61113200 | 0.00034000  |
| N | 1.57760400  | -0.72516300 | 0.00005100  |
| H | 1.32281500  | -1.69699200 | 0.00051600  |
| C | 0.56685000  | 0.21279800  | -0.00006600 |
| C | -0.79919600 | -0.25515700 | -0.00008400 |
| C | -1.16873800 | -1.61713500 | -0.00025300 |
| C | -1.81229500 | 0.72764200  | 0.00006500  |
| C | -0.11820000 | 2.40824700  | -0.00002500 |
| C | -2.48807200 | -1.98361200 | -0.00015000 |
| H | -0.42405100 | -2.40047700 | -0.00055800 |
| C | -3.16520800 | 0.32306400  | 0.00017100  |
| C | -1.43793600 | 2.09541400  | 0.00008900  |
| H | 0.21195000  | 3.43878700  | -0.00007100 |
| C | -3.49686200 | -1.00309700 | 0.00009700  |
| H | -2.75542700 | -3.03102200 | -0.00028300 |
| H | -3.93357800 | 1.08525900  | 0.00030400  |
| H | -2.19471800 | 2.86677200  | 0.00015600  |
| H | -4.53573400 | -1.30389300 | 0.00018900  |
| N | 0.87612700  | 1.48426300  | -0.00004500 |

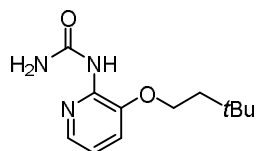

|   |             |             |             |
|---|-------------|-------------|-------------|
| C | 3.05894200  | 2.37253500  | -0.01188900 |
| C | 1.84379300  | 3.00895100  | -0.00207400 |
| C | 0.68073600  | 2.23063100  | 0.01175000  |
| C | 0.79758300  | 0.86261200  | 0.01467600  |
| C | 2.09819800  | 0.29179700  | 0.00496900  |
| H | 3.98397900  | 2.93352800  | -0.02336600 |
| H | 1.78593500  | 4.08691100  | -0.00519600 |
| H | -0.29065900 | 2.70227300  | 0.02045300  |
| N | 3.18559100  | 1.03717900  | -0.00810000 |
| C | 3.26246400  | -1.95920400 | -0.00043900 |
| N | 4.48472700  | -1.38940300 | -0.01587000 |
| H | 4.57939600  | -0.38455700 | -0.02048900 |
| H | 5.27053300  | -2.01281800 | -0.02445100 |
| O | 3.05995300  | -3.15663500 | 0.00519400  |
| N | 2.16948200  | -1.08571400 | 0.00944100  |



|   |             |             |             |
|---|-------------|-------------|-------------|
| H | 1.28778300  | -1.57448200 | 0.02001500  |
| O | -0.22413900 | -0.02553900 | 0.02552300  |
| C | -1.55129300 | 0.48512300  | 0.00732800  |
| H | -1.71082800 | 1.10122600  | 0.89709000  |
| H | -1.67876100 | 1.11409400  | -0.87814900 |
| C | -3.98455900 | -0.36403900 | -0.00566200 |
| C | -2.48652200 | -0.70518100 | -0.02213100 |
| H | -2.25452800 | -1.34159300 | 0.83572200  |
| H | -2.26203800 | -1.28727700 | -0.91967700 |
| C | -4.35175900 | 0.53713700  | -1.18664700 |
| H | -5.43343300 | 0.67195100  | -1.23592000 |
| H | -3.90276900 | 1.52739300  | -1.09631600 |
| H | -4.02328100 | 0.09791900  | -2.13095300 |
| C | -4.37523300 | 0.32282300  | 1.30451000  |
| H | -5.45436000 | 0.48127100  | 1.33888800  |
| H | -4.09776100 | -0.29027500 | 2.16401700  |
| H | -3.89975200 | 1.29848400  | 1.41378900  |
| C | -4.75854900 | -1.67797900 | -0.12214700 |
| H | -5.83385300 | -1.49404500 | -0.10119400 |
| H | -4.52034200 | -2.19053700 | -1.05573900 |
| H | -4.51320000 | -2.34775000 | 0.70397900  |

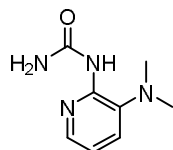

|   |             |             |             |
|---|-------------|-------------|-------------|
| C | 0.31319800  | 2.64493100  | 0.09992400  |
| C | 1.66249100  | 2.39010100  | 0.03115600  |
| C | 2.07519900  | 1.05992400  | -0.05014800 |
| C | 1.14167000  | 0.04667700  | -0.06954100 |
| C | -0.22807800 | 0.42385500  | -0.04663500 |
| H | -0.06049600 | 3.65774400  | 0.18038500  |
| H | 2.37848200  | 3.19792900  | 0.05020100  |
| H | 3.12941400  | 0.82227400  | -0.09083300 |
| N | -0.61646600 | 1.68442100  | 0.05459800  |
| C | -2.55935100 | -0.57825700 | -0.12833500 |
| N | -3.14768600 | 0.60410700  | 0.15249600  |
| H | -4.14995600 | 0.62142900  | 0.10453600  |
| H | -2.59223000 | 1.44685900  | 0.17766200  |
| O | -3.15902200 | -1.61564400 | -0.32742900 |
| N | -1.16111100 | -0.58839000 | -0.15414000 |
| H | -0.78565200 | -1.49205000 | -0.40327000 |
| N | 1.45721900  | -1.33305700 | -0.13803400 |
| C | 1.29452900  | -2.01848900 | 1.14496600  |
| H | 1.36596200  | -3.09404400 | 0.98698700  |
| H | 2.07030100  | -1.71369200 | 1.85953800  |
| H | 0.32080300  | -1.79472800 | 1.57595200  |
| C | 2.74195400  | -1.64701300 | -0.73633800 |
| H | 3.58990500  | -1.38005400 | -0.09060400 |
| H | 2.78751000  | -2.71975600 | -0.91903800 |
| H | 2.84477900  | -1.12669500 | -1.68681200 |

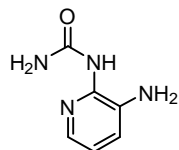

|   |             |             |             |
|---|-------------|-------------|-------------|
| C | 1.59923600  | -1.76754700 | -0.04921200 |
| C | 2.72323300  | -0.97346100 | -0.05491100 |
| C | 2.55315700  | 0.40791500  | -0.00584300 |
| C | 1.28439900  | 0.94396400  | 0.02722700  |
| C | 0.19467000  | 0.04200100  | -0.02649300 |
| H | 1.67600500  | -2.84677100 | -0.06137400 |
| H | 3.70912500  | -1.41278700 | -0.07857500 |
| H | 3.41108400  | 1.06863300  | 0.02222300  |
| N | 0.35868900  | -1.26819500 | -0.04059800 |
| C | -2.34596600 | 0.00011400  | -0.01769900 |
| N | -2.38031500 | -1.32355000 | 0.24903400  |
| H | -3.28569500 | -1.75491500 | 0.20279300  |
| H | -1.52780600 | -1.86230000 | 0.18908000  |
| O | -3.32640100 | 0.69726100  | -0.18197600 |
| N | -1.07835700 | 0.59442800  | -0.05947400 |
| H | -1.13837100 | 1.56139100  | -0.34053200 |
| N | 1.02675500  | 2.32235400  | 0.04976000  |
| H | 0.36238500  | 2.59666800  | 0.76249200  |
| H | 1.86469200  | 2.87881700  | 0.13024200  |

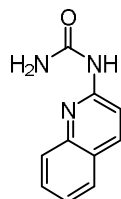

|   |             |             |             |
|---|-------------|-------------|-------------|
| C | 3.28540100  | -0.36104900 | 0.00002400  |
| N | 2.78813200  | -1.61210200 | -0.00003400 |
| H | 3.45498600  | -2.36167000 | 0.00014100  |
| H | 1.78920500  | -1.76056500 | -0.00006700 |
| O | 4.46654000  | -0.08050100 | 0.00018400  |
| N | 2.34600200  | 0.68175300  | -0.00015300 |
| H | 2.80485600  | 1.57823600  | 0.00007100  |
| C | 0.96472900  | 0.67947100  | -0.00008000 |
| C | 0.32352800  | 1.95799400  | -0.00003400 |
| C | -1.06094700 | -0.40775700 | -0.00003500 |
| C | -1.02930800 | 2.00811100  | 0.00001500  |
| H | 0.92390800  | 2.85727100  | -0.00004200 |
| C | -1.78314700 | 0.80573400  | 0.00001700  |
| C | -1.77484700 | -1.62403900 | -0.00003700 |
| H | -1.54727300 | 2.95914800  | 0.00005200  |
| C | -3.19193400 | 0.78059000  | 0.00006800  |
| C | -3.14429400 | -1.62243000 | 0.00001300  |
| H | -1.21113200 | -2.54673600 | -0.00007800 |
| C | -3.86405700 | -0.41193500 | 0.00006700  |

|   |             |             |             |
|---|-------------|-------------|-------------|
| H | -3.73109500 | 1.71970700  | 0.00011000  |
| H | -3.68200700 | -2.56086700 | 0.00001100  |
| H | -4.94475900 | -0.42916700 | 0.00010600  |
| N | 0.30304300  | -0.44671800 | -0.00008200 |

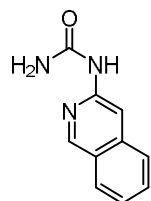

|   |             |             |             |
|---|-------------|-------------|-------------|
| C | -3.49028800 | -0.17094300 | 0.00001200  |
| N | -3.51361400 | 1.17737100  | 0.00003600  |
| H | -4.41952700 | 1.60809600  | 0.00008100  |
| H | -2.65382500 | 1.70399900  | 0.00000000  |
| O | -4.48137900 | -0.87411900 | 0.00004500  |
| N | -2.23324100 | -0.78570100 | -0.00006300 |
| H | -2.33108100 | -1.78824100 | -0.00001600 |
| C | -0.93944100 | -0.28845400 | -0.00003400 |
| C | 0.12405200  | -1.16699600 | -0.00001900 |
| C | 1.43438900  | -0.66695600 | -0.00000400 |
| H | -0.04870200 | -2.23521700 | -0.00001900 |
| C | 0.44945900  | 1.53075800  | -0.00002200 |
| C | 1.61191100  | 0.73726400  | -0.00000600 |
| C | 2.58814800  | -1.49361800 | 0.00001200  |
| H | 0.54761100  | 2.61216500  | -0.00002400 |
| C | 2.91400800  | 1.29033200  | 0.00000800  |
| C | 3.83240000  | -0.93442600 | 0.00002500  |
| H | 2.46421100  | -2.56866200 | 0.00001200  |
| C | 4.00444000  | 0.47174500  | 0.00002300  |
| H | 3.02655700  | 2.36729400  | 0.00000700  |
| H | 4.70638700  | -1.57201700 | 0.00003600  |
| H | 5.00219300  | 0.88714800  | 0.00003500  |
| N | -0.76989600 | 1.05492300  | -0.00003700 |
